# Supplementary material for: Comparative Proteomics Reveals Strain-Specific β-TrCP Degradation via Rotavirus NSP1 Hijacking a Host Cullin-3-Rbx1 Complex
Source: PLoS Pathog. 2016 Oct 5;12(10):e1005929. doi: 10.1371/journal.ppat.1005929 (PMC5051689; doi:10.1371/journal.ppat.1005929)
Supplement: S6 Table — (XLSX) [file ppat.1005929.s013.xlsx]

## Sheet: Global
Rank Number	Protein Name	SA11-5S_01	SA11-5S_02	SA11-5S_03	SA11-5S_04	SA11-5S_05	SA11-5S_06	SA11-5S_07	SA11-5S_08	CONTAMINANT	MAX	SUM
1	'>gi|41399285|ref|NP_955472.1| 60 kDa heat shock protein, mitochondrial [Homo sapiens]'	23	17	41	116	264	51	25	1	0	264	538
2	'>SA11-5S-N-NSP1'	50	45	51	90	204	83	67	4	0	204	594
3	'>gi|13654237|ref|NP_008835.5| DNA-dependent protein kinase catalytic subunit isoform 1 [Homo sapiens]'	141	168	53	NaN	NaN	NaN	NaN	NaN	0	168	362
4	'>gi|57013276|ref|NP_006073.2| tubulin alpha-1B chain [Homo sapiens]'	19	17	NaN	1	129	42	NaN	NaN	0	129	208
5	'>gi|29788785|ref|NP_821133.1| tubulin beta chain isoform b [Homo sapiens]'	20	25	22	36	127	28	13	3	0	127	274
6	'>gi|153945728|ref|NP_005900.2| microtubule-associated protein 1B [Homo sapiens]'	63	88	20	20	13	4	NaN	NaN	0	88	208
7	'>gi|4504733|ref|NP_003595.1| insulin receptor substrate 4 [Homo sapiens]'	8	6	82	NaN	NaN	13	5	NaN	0	82	114
8	'>gi|5729877|ref|NP_006588.1| heat shock cognate 71 kDa protein isoform 1 [Homo sapiens]'	8	NaN	23	60	78	NaN	3	NaN	0	78	172
9	'>gi|578838539|ref|XP_006724776.1| PREDICTED: insulin receptor substrate 4 isoform X2 [Homo sapiens]'	NaN	NaN	NaN	78	45	NaN	NaN	NaN	0	78	123
10	'>gi|154146191|ref|NP_005339.3| heat shock protein HSP 90-alpha isoform 2 [Homo sapiens]'	NaN	NaN	11	65	9	NaN	NaN	NaN	0	65	85
11	'>gi|58530840|ref|NP_004406.2| desmoplakin isoform I [Homo sapiens]'	44	47	52	47	27	63	15	26	0	63	321
12	'>gi|4557553|ref|NP_000108.1| emerin [Homo sapiens]'	NaN	NaN	NaN	6	28	61	2	NaN	0	61	97
13	'>gi|61676188|ref|NP_113584.3| E3 ubiquitin-protein ligase HUWE1 [Homo sapiens]'	60	25	5	NaN	NaN	NaN	NaN	NaN	0	60	90
14	'>gi|283436222|ref|NP_001164006.1| ATPase family AAA domain-containing protein 3A isoform 2 [Homo sapiens]'	NaN	NaN	NaN	25	59	NaN	NaN	NaN	0	59	84
15	'>gi|237681109|ref|NP_001153705.1| sodium/potassium-transporting ATPase subunit alpha-1 isoform c [Homo sapiens]'	NaN	NaN	12	56	NaN	NaN	NaN	NaN	0	56	68
16	'>gi|5031741|ref|NP_005871.1| dnaJ homolog subfamily A member 2 [Homo sapiens]'	2	1	NaN	9	54	22	4	NaN	0	54	92
17	'>gi|33350932|ref|NP_001367.2| cytoplasmic dynein 1 heavy chain 1 [Homo sapiens]'	51	NaN	NaN	NaN	NaN	NaN	NaN	NaN	0	51	51
18	'>gi|22202629|ref|NP_665811.1| apoptosis-inducing factor 1, mitochondrial isoform 2 precursor [Homo sapiens]'	NaN	NaN	8	35	50	7	NaN	NaN	0	50	100
19	'>gi|24638454|ref|NP_733765.1| sarcoplasmic/endoplasmic reticulum calcium ATPase 2 isoform b [Homo sapiens]'	NaN	NaN	NaN	50	NaN	NaN	NaN	NaN	0	50	50
20	'>gi|528524479|ref|NP_001268649.1| polyubiquitin-B precursor [Homo sapiens]'	12	9	NaN	49	44	14	12	1	0	49	141
21	'>gi|167466173|ref|NP_005337.2| heat shock 70 kDa protein 1A/1B [Homo sapiens]'	1	NaN	5	29	49	NaN	NaN	NaN	0	49	84
22	'>gi|54607053|ref|NP_006827.1| translational activator GCN1 [Homo sapiens]'	NaN	46	4	NaN	NaN	NaN	NaN	NaN	0	46	50
23	'>gi|157412270|ref|NP_112480.2| heterogeneous nuclear ribonucleoprotein M isoform b [Homo sapiens]'	NaN	NaN	NaN	41	32	NaN	NaN	NaN	0	41	73
24	'>gi|148470406|ref|NP_001091676.1| heterogeneous nuclear ribonucleoprotein F [Homo sapiens]'	2	NaN	5	3	39	16	4	1	0	39	70
25	'>gi|4504511|ref|NP_001530.1| dnaJ homolog subfamily A member 1 [Homo sapiens]'	NaN	1	NaN	9	39	11	4	NaN	0	39	64
26	'>gi|48762932|ref|NP_006576.2| T-complex protein 1 subunit theta isoform 1 [Homo sapiens]'	NaN	NaN	NaN	11	39	NaN	NaN	NaN	0	39	50
27	'>gi|8051636|ref|NP_009166.2| exportin-T [Homo sapiens]'	NaN	NaN	7	38	NaN	NaN	NaN	NaN	0	38	45
28	'>gi|578833177|ref|XP_005259911.2| PREDICTED: A-kinase anchor protein 8-like isoform X1 [Homo sapiens]'	NaN	NaN	NaN	38	NaN	NaN	NaN	NaN	0	38	38
29	'>gi|55770844|ref|NP_001894.2| catenin alpha-1 isoform 1 [Homo sapiens]'	NaN	NaN	10	37	NaN	NaN	NaN	NaN	0	37	47
30	'>gi|208022622|ref|NP_001129064.1| ubiquitin-40S ribosomal protein S27a precursor [Homo sapiens]'	NaN	NaN	37	NaN	NaN	NaN	NaN	NaN	0	37	37
31	'>gi|431822408|ref|NP_001258901.1| heat shock protein HSP 90-beta isoform c [Homo sapiens]'	5	7	22	35	24	3	2	NaN	0	35	98
32	'>gi|148529014|ref|NP_001914.3| DNA damage-binding protein 1 [Homo sapiens]'	NaN	NaN	35	22	NaN	NaN	NaN	NaN	0	35	57
33	'>gi|393715091|ref|NP_001257328.1| tubulin alpha-1A chain isoform 1 [Homo sapiens]'	NaN	NaN	NaN	35	NaN	NaN	NaN	NaN	0	35	35
34	'>gi|156071459|ref|NP_001143.2| ADP/ATP translocase 2 [Homo sapiens]'	NaN	NaN	NaN	4	9	34	5	NaN	0	34	52
35	'>gi|24307939|ref|NP_036205.1| T-complex protein 1 subunit epsilon [Homo sapiens]'	NaN	NaN	NaN	11	34	NaN	NaN	NaN	0	34	45
36	'>gi|48526509|ref|NP_001001563.1| mitochondrial import inner membrane translocase subunit TIM50 [Homo sapiens]'	NaN	NaN	NaN	2	27	33	2	NaN	0	33	64
37	'>gi|41872631|ref|NP_004095.4| fatty acid synthase [Homo sapiens]'	NaN	33	3	NaN	NaN	NaN	NaN	NaN	0	33	36
38	'>gi|18105007|ref|NP_004332.2| CAD protein [Homo sapiens]'	NaN	32	28	NaN	NaN	NaN	NaN	NaN	0	32	60
39	'>gi|100913206|ref|NP_001348.2| ATP-dependent RNA helicase A [Homo sapiens]'	NaN	NaN	32	3	NaN	NaN	NaN	NaN	0	32	35
40	'>gi|4503131|ref|NP_001895.1| catenin beta-1 [Homo sapiens]'	NaN	NaN	NaN	31	2	NaN	NaN	NaN	0	31	33
41	'>gi|5031753|ref|NP_005511.1| heterogeneous nuclear ribonucleoprotein H [Homo sapiens]'	NaN	NaN	NaN	NaN	31	NaN	NaN	NaN	0	31	31
42	'>gi|4505775|ref|NP_002626.1| phosphate carrier protein, mitochondrial isoform b precursor [Homo sapiens]'	NaN	1	NaN	3	10	30	5	NaN	0	30	49
43	'>gi|355477267|ref|NP_001239051.1| PAS domain-containing serine/threonine-protein kinase isoform 3 [Homo sapiens]'	NaN	NaN	30	12	NaN	NaN	NaN	NaN	0	30	42
44	'>gi|5031579|ref|NP_005849.1| A-kinase anchor protein 8 [Homo sapiens]'	NaN	NaN	9	30	1	NaN	NaN	NaN	0	30	40
45	'>gi|530426851|ref|XP_005266190.1| PREDICTED: protein transport protein Sec16A isoform X2 [Homo sapiens]'	NaN	30	NaN	NaN	NaN	NaN	NaN	NaN	0	30	30
46	'>gi|63162572|ref|NP_005989.3| T-complex protein 1 subunit gamma isoform a [Homo sapiens]'	NaN	NaN	NaN	NaN	30	NaN	NaN	NaN	0	30	30
47	'>gi|5032179|ref|NP_005753.1| transcription intermediary factor 1-beta [Homo sapiens]'	NaN	NaN	16	29	NaN	NaN	NaN	NaN	0	29	45
48	'>gi|16751921|ref|NP_444513.1| dermcidin isoform 1 preproprotein [Homo sapiens]'	NaN	NaN	NaN	12	NaN	29	NaN	NaN	0	29	41
49	'>gi|393715095|ref|NP_001257329.1| tubulin alpha-1A chain isoform 2 [Homo sapiens]'	NaN	NaN	27	NaN	NaN	NaN	18	3	0	27	48
50	'>gi|124378039|ref|NP_055681.1| protein transport protein Sec16A isoform 1 [Homo sapiens]'	NaN	NaN	27	NaN	NaN	NaN	NaN	NaN	0	27	27
51	'>gi|354983497|ref|NP_001238980.1| protein-L-isoaspartate(D-aspartate) O-methyltransferase isoform 4 [Homo sapiens]'	NaN	NaN	NaN	NaN	NaN	27	NaN	NaN	0	27	27
52	'>gi|38455427|ref|NP_006421.2| T-complex protein 1 subunit delta isoform a [Homo sapiens]'	NaN	NaN	NaN	5	26	NaN	NaN	NaN	0	26	31
53	'>gi|109255228|ref|NP_055627.2| centrosomal protein of 170 kDa isoform alpha [Homo sapiens]'	NaN	NaN	26	2	NaN	NaN	NaN	NaN	0	26	28
54	'>gi|62122917|ref|NP_001014364.1| filaggrin-2 [Homo sapiens]'	12	12	19	6	1	25	6	5	0	25	86
55	'>gi|4506455|ref|NP_002892.1| reticulocalbin-1 precursor [Homo sapiens]'	NaN	NaN	NaN	NaN	25	10	NaN	NaN	0	25	35
56	'>gi|156523970|ref|NP_001613.2| alpha-2-HS-glycoprotein preproprotein [Homo sapiens]'	NaN	NaN	25	NaN	NaN	NaN	NaN	NaN	0	25	25
57	'>gi|4885281|ref|NP_005262.1| glutamate dehydrogenase 1, mitochondrial precursor [Homo sapiens]'	NaN	NaN	NaN	NaN	25	NaN	NaN	NaN	0	25	25
58	'>gi|110825982|ref|NP_057407.2| E3 ISG15--protein ligase HERC5 [Homo sapiens]'	NaN	NaN	22	24	2	NaN	NaN	NaN	0	24	48
59	'>gi|255918196|ref|NP_001157634.1| serine/threonine-protein phosphatase 6 regulatory subunit 3 isoform 1 [Homo sapiens]'	NaN	NaN	24	12	NaN	NaN	NaN	NaN	0	24	36
60	'>gi|4503165|ref|NP_003581.1| cullin-3 isoform 1 [Homo sapiens]'	NaN	NaN	NaN	24	2	NaN	NaN	NaN	0	24	26
61	'>gi|426214088|ref|NP_001258766.1| reticulocalbin-2 isoform b precursor [Homo sapiens]'	NaN	NaN	2	8	23	15	4	NaN	0	23	52
62	'>gi|11321601|ref|NP_002618.1| ATP-dependent 6-phosphofructokinase, platelet type isoform 1 [Homo sapiens]'	NaN	NaN	NaN	23	12	NaN	NaN	NaN	0	23	35
63	'>gi|5803225|ref|NP_006752.1| 14-3-3 protein epsilon [Homo sapiens]'	NaN	NaN	NaN	NaN	NaN	23	2	NaN	0	23	25
64	'>gi|4503483|ref|NP_001952.1| elongation factor 2 [Homo sapiens]'	NaN	NaN	NaN	23	NaN	NaN	NaN	1	0	23	24
65	'>gi|4757810|ref|NP_004037.1| ATP synthase subunit alpha, mitochondrial isoform a precursor [Homo sapiens]'	NaN	NaN	NaN	NaN	23	NaN	NaN	NaN	0	23	23
66	'>gi|5730023|ref|NP_006657.1| ruvB-like 2 [Homo sapiens]'	NaN	NaN	NaN	NaN	23	NaN	NaN	NaN	0	23	23
67	'>gi|119703744|ref|NP_001933.2| desmoglein-1 preproprotein [Homo sapiens]'	21	19	22	19	10	20	12	15	0	22	138
68	'>RVB Gene 3'	5	6	6	3	5	8	6	22	0	22	61
69	'>gi|261399877|ref|NP_001159757.1| T-complex protein 1 subunit eta isoform d [Homo sapiens]'	NaN	NaN	NaN	8	22	NaN	NaN	NaN	0	22	30
70	'>gi|4504191|ref|NP_000170.1| DNA mismatch repair protein Msh6 isoform 1 [Homo sapiens]'	NaN	NaN	22	NaN	NaN	NaN	NaN	NaN	0	22	22
71	'>gi|148613856|ref|NP_001091974.1| probable ATP-dependent RNA helicase DDX17 isoform 3 [Homo sapiens]'	NaN	NaN	NaN	21	17	NaN	NaN	NaN	0	21	38
72	'>gi|356640224|ref|NP_001239268.1| cadherin-4 isoform 3 [Homo sapiens]'	NaN	NaN	21	8	NaN	NaN	NaN	NaN	0	21	29
73	'>gi|237649019|ref|NP_001153682.1| calcium-binding mitochondrial carrier protein Aralar2 isoform 1 [Homo sapiens]'	NaN	NaN	NaN	5	21	NaN	NaN	NaN	0	21	26
74	'>gi|311771535|ref|NP_001185771.1| T-complex protein 1 subunit beta isoform 2 [Homo sapiens]'	NaN	NaN	NaN	5	21	NaN	NaN	NaN	0	21	26
75	'>gi|7657689|ref|NP_055078.1| ATP-dependent zinc metalloprotease YME1L1 isoform 3 [Homo sapiens]'	NaN	NaN	NaN	2	21	NaN	NaN	NaN	0	21	23
76	'>gi|208609990|ref|NP_055484.3| nuclear pore complex protein Nup93 isoform 1 [Homo sapiens]'	NaN	NaN	NaN	21	NaN	NaN	NaN	NaN	0	21	21
77	'>gi|21361399|ref|NP_055040.2| serine/threonine-protein phosphatase 2A 65 kDa regulatory subunit A alpha isoform [Homo sapiens]'	NaN	NaN	NaN	NaN	21	NaN	NaN	NaN	0	21	21
78	'>gi|117606360|ref|NP_056125.3| PH and SEC7 domain-containing protein 3 isoform a [Homo sapiens]'	NaN	NaN	20	3	NaN	NaN	NaN	NaN	0	20	23
79	'>gi|4506675|ref|NP_002941.1| dolichyl-diphosphooligosaccharide--protein glycosyltransferase subunit 1 precursor [Homo sapiens]'	NaN	NaN	NaN	14	19	NaN	NaN	NaN	0	19	33
80	'>gi|390979647|ref|NP_705833.3| beta/gamma crystallin domain-containing protein 3 [Homo sapiens]'	NaN	19	8	NaN	NaN	NaN	NaN	NaN	0	19	27
81	'>gi|57863257|ref|NP_110379.2| T-complex protein 1 subunit alpha isoform a [Homo sapiens]'	NaN	NaN	NaN	8	19	NaN	NaN	NaN	0	19	27
82	'>gi|4507157|ref|NP_003096.1| sortilin-related receptor preproprotein [Homo sapiens]'	NaN	19	6	NaN	NaN	NaN	NaN	NaN	0	19	25
83	'>gi|66933005|ref|NP_001019820.1| calnexin precursor [Homo sapiens]'	NaN	NaN	NaN	19	3	NaN	NaN	NaN	0	19	22
84	'>gi|225545550|ref|NP_057195.2| telomere length regulation protein TEL2 homolog [Homo sapiens]'	NaN	NaN	NaN	19	NaN	NaN	NaN	NaN	0	19	19
85	'>gi|4502643|ref|NP_001753.1| T-complex protein 1 subunit zeta isoform a [Homo sapiens]'	NaN	NaN	NaN	NaN	19	NaN	NaN	NaN	0	19	19
86	'>gi|4503471|ref|NP_001393.1| elongation factor 1-alpha 1 [Homo sapiens]'	2	4	2	7	18	5	3	1	0	18	42
87	'>gi|4507943|ref|NP_003391.1| exportin-1 [Homo sapiens]'	NaN	NaN	14	18	NaN	NaN	NaN	NaN	0	18	32
88	'>gi|4502551|ref|NP_001210.1| calumenin isoform a precursor [Homo sapiens]'	NaN	NaN	NaN	3	18	10	NaN	NaN	0	18	31
89	'>gi|66392203|ref|NP_001018146.1| NME1-NME2 protein [Homo sapiens]'	NaN	NaN	NaN	NaN	NaN	11	18	NaN	0	18	29
90	'>gi|42822864|ref|NP_976322.1| ribonuclease inhibitor [Homo sapiens]'	1	NaN	1	1	18	4	1	NaN	0	18	26
91	'>gi|618468591|ref|NP_001278557.1| endoribonuclease Dicer isoform 1 [Homo sapiens]'	NaN	2	18	3	NaN	NaN	NaN	NaN	0	18	23
92	'>gi|148664226|ref|NP_004563.2| plakophilin-2 isoform 2b [Homo sapiens]'	NaN	NaN	NaN	18	1	1	NaN	NaN	0	18	20
93	'>gi|5453660|ref|NP_006313.1| gamma-tubulin complex component 3 isoform 1 [Homo sapiens]'	NaN	NaN	NaN	18	NaN	NaN	NaN	NaN	0	18	18
94	'>gi|61744483|ref|NP_001013269.1| 4F2 cell-surface antigen heavy chain isoform f [Homo sapiens]'	NaN	NaN	3	17	4	NaN	NaN	NaN	0	17	24
95	'>gi|166235184|ref|NP_055246.2| paladin [Homo sapiens]'	NaN	NaN	NaN	17	NaN	NaN	NaN	NaN	0	17	17
96	'>gi|21361794|ref|NP_060918.2| cullin-associated NEDD8-dissociated protein 1 [Homo sapiens]'	NaN	NaN	17	NaN	NaN	NaN	NaN	NaN	0	17	17
97	'>gi|57864582|ref|NP_001009931.1| hornerin [Homo sapiens]'	6	8	11	8	3	16	6	2	0	16	60
98	'>gi|5031877|ref|NP_005564.1| lamin-B1 isoform 1 [Homo sapiens]'	NaN	NaN	NaN	11	16	NaN	NaN	NaN	0	16	27
99	'>gi|312433998|ref|NP_001186078.1| lactotransferrin isoform 2 [Homo sapiens]'	2	1	4	16	NaN	1	1	NaN	0	16	25
100	'>gi|29788768|ref|NP_821080.1| tubulin beta-2B chain [Homo sapiens]'	NaN	NaN	NaN	6	16	2	NaN	NaN	0	16	24
101	'>gi|45387945|ref|NP_065779.1| extended synaptotagmin-2 [Homo sapiens]'	NaN	NaN	NaN	16	3	NaN	NaN	NaN	0	16	19
102	'>gi|13435356|ref|NP_006109.2| HCLS1-associated protein X-1 isoform a [Homo sapiens]'	NaN	NaN	NaN	NaN	NaN	16	NaN	NaN	0	16	16
103	'>gi|205360838|ref|NP_005138.3| dnaJ homolog subfamily A member 3, mitochondrial isoform 1 [Homo sapiens]'	NaN	NaN	NaN	NaN	16	NaN	NaN	NaN	0	16	16
104	'>gi|30410796|ref|NP_789839.1| proteasome activator complex subunit 3 isoform 2 [Homo sapiens]'	NaN	NaN	NaN	NaN	NaN	16	NaN	NaN	0	16	16
105	'>gi|578836872|ref|XP_006724172.1| PREDICTED: cdc42 effector protein 1 isoform X3 [Homo sapiens]'	NaN	NaN	NaN	NaN	16	NaN	NaN	NaN	0	16	16
106	'>gi|4502337|ref|NP_001176.1| zinc-alpha-2-glycoprotein precursor [Homo sapiens]'	6	5	5	2	2	15	6	3	0	15	44
107	'>gi|4502027|ref|NP_000468.1| serum albumin preproprotein [Homo sapiens]'	6	7	NaN	NaN	7	1	6	15	0	15	42
108	'>gi|14141161|ref|NP_004492.2| heterogeneous nuclear ribonucleoprotein U isoform b [Homo sapiens]'	NaN	NaN	15	12	NaN	NaN	NaN	NaN	0	15	27
109	'>gi|31621305|ref|NP_573566.2| leucine-rich PPR motif-containing protein, mitochondrial precursor [Homo sapiens]'	NaN	NaN	15	NaN	NaN	NaN	1	NaN	0	15	16
110	'>gi|32189394|ref|NP_001677.2| ATP synthase subunit beta, mitochondrial precursor [Homo sapiens]'	NaN	NaN	NaN	NaN	15	NaN	NaN	NaN	0	15	15
111	'>gi|38201706|ref|NP_060124.2| sterile alpha motif domain-containing protein 9 [Homo sapiens]'	NaN	NaN	15	NaN	NaN	NaN	NaN	NaN	0	15	15
112	'>gi|4506439|ref|NP_002884.1| histone-binding protein RBBP7 isoform 2 [Homo sapiens]'	NaN	NaN	NaN	NaN	15	NaN	NaN	NaN	0	15	15
113	'>gi|4506787|ref|NP_003861.1| ras GTPase-activating-like protein IQGAP1 [Homo sapiens]'	NaN	NaN	15	NaN	NaN	NaN	NaN	NaN	0	15	15
114	'>gi|4504811|ref|NP_002221.1| junction plakoglobin [Homo sapiens]'	14	8	14	14	13	14	6	10	0	14	93
115	'>gi|4501887|ref|NP_001605.1| actin, cytoplasmic 2 [Homo sapiens]'	NaN	NaN	2	14	13	13	5	4	0	14	51
116	'>gi|5174735|ref|NP_006079.1| tubulin beta-4B chain [Homo sapiens]'	3	6	2	6	14	7	2	NaN	0	14	40
117	'>gi|300192933|ref|NP_006787.2| AFG3-like protein 2 [Homo sapiens]'	NaN	NaN	NaN	14	3	NaN	NaN	NaN	0	14	17
118	'>gi|18699732|ref|NP_057260.2| 45 kDa calcium-binding protein isoform 2 precursor [Homo sapiens]'	NaN	NaN	NaN	NaN	14	1	NaN	NaN	0	14	15
119	'>gi|371502112|ref|NP_001243064.1| exportin-2 isoform 2 [Homo sapiens]'	NaN	NaN	1	14	NaN	NaN	NaN	NaN	0	14	15
120	'>gi|226530908|ref|NP_005380.2| protein-L-isoaspartate(D-aspartate) O-methyltransferase isoform 1 [Homo sapiens]'	NaN	NaN	NaN	NaN	NaN	NaN	14	NaN	0	14	14
121	'>gi|4505941|ref|NP_000929.1| DNA-directed RNA polymerase II subunit RPB2 [Homo sapiens]'	NaN	NaN	14	NaN	NaN	NaN	NaN	NaN	0	14	14
122	'>gi|510937039|ref|NP_001265400.1| protein MON2 homolog isoform 4 [Homo sapiens]'	NaN	NaN	14	NaN	NaN	NaN	NaN	NaN	0	14	14
123	'>gi|665505971|ref|NP_001287783.1| dermcidin isoform 2 preproprotein [Homo sapiens]'	9	13	9	NaN	10	NaN	12	2	0	13	55
124	'>gi|290542345|ref|NP_001166599.1| YTH domain-containing family protein 2 isoform 1 [Homo sapiens]'	NaN	NaN	NaN	11	13	1	NaN	NaN	0	13	25
125	'>gi|170932494|ref|NP_003560.2| syntaxin-7 [Homo sapiens]'	NaN	7	NaN	NaN	NaN	4	NaN	13	0	13	24
126	'>gi|16507237|ref|NP_005338.1| 78 kDa glucose-regulated protein precursor [Homo sapiens]'	NaN	NaN	NaN	13	7	2	NaN	NaN	0	13	22
127	'>gi|4502285|ref|NP_001672.1| sarcoplasmic/endoplasmic reticulum calcium ATPase 2 isoform a [Homo sapiens]'	NaN	NaN	13	NaN	7	1	NaN	NaN	0	13	21
128	'>gi|68800243|ref|NP_001560.2| interleukin-1 receptor-associated kinase 1 isoform 1 [Homo sapiens]'	NaN	NaN	NaN	13	8	NaN	NaN	NaN	0	13	21
129	'>gi|62750354|ref|NP_954659.1| matrin-3 isoform a [Homo sapiens]'	NaN	NaN	13	7	NaN	NaN	NaN	NaN	0	13	20
130	'>gi|216548223|ref|NP_055664.3| synaptic vesicle glycoprotein 2A isoform 1 [Homo sapiens]'	NaN	NaN	1	13	3	NaN	NaN	NaN	0	13	17
131	'>gi|574584816|ref|NP_001276058.1| tubulin beta-4A chain isoform 3 [Homo sapiens]'	NaN	NaN	2	NaN	13	NaN	NaN	NaN	0	13	15
132	'>gi|112421013|ref|NP_065859.3| signal-induced proliferation-associated 1-like protein 2 [Homo sapiens]'	NaN	NaN	13	NaN	NaN	NaN	NaN	NaN	0	13	13
133	'>gi|133925803|ref|NP_001076047.1| RNA binding protein fox-1 homolog 2 isoform 5 [Homo sapiens]'	NaN	NaN	NaN	NaN	13	NaN	NaN	NaN	0	13	13
134	'>gi|14165439|ref|NP_002131.2| heterogeneous nuclear ribonucleoprotein K isoform a [Homo sapiens]'	NaN	NaN	NaN	NaN	13	NaN	NaN	NaN	0	13	13
135	'>gi|18643383|ref|NP_079470.1| inositol-trisphosphate 3-kinase C [Homo sapiens]'	NaN	NaN	NaN	13	NaN	NaN	NaN	NaN	0	13	13
136	'>gi|19923142|ref|NP_002256.2| importin subunit beta-1 isoform 1 [Homo sapiens]'	NaN	NaN	NaN	13	NaN	NaN	NaN	NaN	0	13	13
137	'>gi|4506753|ref|NP_003698.1| ruvB-like 1 [Homo sapiens]'	NaN	NaN	NaN	NaN	13	NaN	NaN	NaN	0	13	13
138	'>gi|4508011|ref|NP_003444.1| zinc finger MYM-type protein 2 [Homo sapiens]'	NaN	NaN	13	NaN	NaN	NaN	NaN	NaN	0	13	13
139	'>gi|5453906|ref|NP_006310.1| CDP-diacylglycerol--inositol 3-phosphatidyltransferase isoform 1 [Homo sapiens]'	NaN	NaN	NaN	NaN	NaN	NaN	13	NaN	0	13	13
140	'>gi|66528888|ref|NP_001018125.1| Fanconi anemia group D2 protein isoform b [Homo sapiens]'	NaN	NaN	13	NaN	NaN	NaN	NaN	NaN	0	13	13
141	'>gi|576583524|ref|NP_001276675.1| glyceraldehyde-3-phosphate dehydrogenase isoform 1 [Homo sapiens]'	6	4	3	5	2	12	3	6	0	12	41
142	'>gi|5454064|ref|NP_006319.1| RNA-binding protein 14 isoform 1 [Homo sapiens]'	NaN	NaN	NaN	12	9	NaN	NaN	NaN	0	12	21
143	'>gi|4757834|ref|NP_004273.1| BAG family molecular chaperone regulator 2 [Homo sapiens]'	NaN	NaN	NaN	NaN	1	12	7	NaN	0	12	20
144	'>gi|56181387|ref|NP_005852.2| E3 ubiquitin-protein ligase CHIP isoform a [Homo sapiens]'	NaN	NaN	NaN	NaN	6	12	NaN	NaN	0	12	18
145	'>gi|4505357|ref|NP_002480.1| NADH dehydrogenase [ubiquinone] 1 alpha subcomplex subunit 4 [Homo sapiens]'	NaN	NaN	NaN	NaN	1	2	12	2	0	12	17
146	'>gi|38505222|ref|NP_061895.3| protein disulfide-isomerase TMX3 precursor [Homo sapiens]'	NaN	NaN	NaN	3	12	NaN	NaN	NaN	0	12	15
147	'>gi|73760405|ref|NP_001027454.1| thymopoietin isoform beta [Homo sapiens]'	NaN	NaN	NaN	1	12	2	NaN	NaN	0	12	15
148	'>gi|221316632|ref|NP_001137534.1| coatomer subunit beta [Homo sapiens]'	NaN	NaN	NaN	12	NaN	NaN	NaN	NaN	0	12	12
149	'>gi|26051235|ref|NP_060700.2| nuclear pore complex protein Nup133 [Homo sapiens]'	NaN	NaN	12	NaN	NaN	NaN	NaN	NaN	0	12	12
150	'>gi|301172750|ref|NP_002449.2| mucin-5B precursor [Homo sapiens]'	NaN	NaN	NaN	12	NaN	NaN	NaN	NaN	0	12	12
151	'''>gi|4506019|ref|NP_002708.1| serine/threonine-protein phosphatase 2A 55 kDa regulatory subunit B alpha isoform isoform 1 [Homo s...'' <Preview truncated at 128 characters>'	NaN	NaN	NaN	NaN	12	NaN	NaN	NaN	0	12	12
152	'>gi|4506725|ref|NP_000998.1| 40S ribosomal protein S4, X isoform X isoform [Homo sapiens]'	NaN	NaN	NaN	NaN	NaN	12	NaN	NaN	0	12	12
153	'>gi|62414289|ref|NP_003371.2| vimentin [Homo sapiens]'	NaN	NaN	NaN	NaN	12	NaN	NaN	NaN	0	12	12
154	'>gi|8922665|ref|NP_060686.1| pantothenate kinase 4 [Homo sapiens]'	NaN	NaN	NaN	12	NaN	NaN	NaN	NaN	0	12	12
155	'>gi|5032093|ref|NP_005619.1| neutral amino acid transporter B(0) isoform 1 [Homo sapiens]'	1	NaN	4	11	9	NaN	NaN	NaN	0	11	25
156	'>gi|151101459|ref|NP_055746.3| serine/threonine-protein phosphatase 6 regulatory subunit 1 [Homo sapiens]'	NaN	NaN	11	8	NaN	NaN	NaN	NaN	0	11	19
157	'>gi|308387374|ref|NP_001184147.1| cAMP-specific 3'',5''-cyclic phosphodiesterase 4D isoform PDE4D5 [Homo sapiens]'	2	2	NaN	11	2	NaN	NaN	1	0	11	18
158	'>gi|4505067|ref|NP_002349.1| mitotic spindle assembly checkpoint protein MAD2A [Homo sapiens]'	NaN	NaN	NaN	NaN	NaN	11	7	NaN	0	11	18
159	'>gi|14043072|ref|NP_112533.1| heterogeneous nuclear ribonucleoproteins A2/B1 isoform B1 [Homo sapiens]'	NaN	NaN	NaN	NaN	11	6	NaN	NaN	0	11	17
160	'''>gi|20070197|ref|NP_005207.2| dolichyl-diphosphooligosaccharide--protein glycosyltransferase 48 kDa subunit precursor [Homo sapi...'' <Preview truncated at 128 characters>'	NaN	NaN	NaN	NaN	11	3	NaN	NaN	0	11	14
161	'>gi|4758138|ref|NP_004387.1| probable ATP-dependent RNA helicase DDX5 [Homo sapiens]'	NaN	NaN	NaN	3	11	NaN	NaN	NaN	0	11	14
162	'>gi|13654270|ref|NP_112483.1| ribosomal biogenesis protein LAS1L isoform 1 [Homo sapiens]'	NaN	NaN	2	11	NaN	NaN	NaN	NaN	0	11	13
163	'>gi|17986001|ref|NP_005505.2| major histocompatibility complex, class I, B precursor [Homo sapiens]'	NaN	NaN	NaN	NaN	11	1	NaN	NaN	0	11	12
164	'>gi|237681111|ref|NP_001153706.1| sodium/potassium-transporting ATPase subunit alpha-1 isoform d [Homo sapiens]'	NaN	NaN	NaN	NaN	11	1	NaN	NaN	0	11	12
165	'>gi|145309311|ref|NP_001034680.2| probable ubiquitin carboxyl-terminal hydrolase FAF-X isoform 4 [Homo sapiens]'	NaN	11	NaN	NaN	NaN	NaN	NaN	NaN	0	11	11
166	'>gi|192448443|ref|NP_068758.3| peptidyl-prolyl cis-trans isomerase FKBP10 precursor [Homo sapiens]'	NaN	NaN	NaN	11	NaN	NaN	NaN	NaN	0	11	11
167	'>gi|197927448|ref|NP_060501.3| WD repeat-containing protein 6 [Homo sapiens]'	NaN	NaN	NaN	11	NaN	NaN	NaN	NaN	0	11	11
168	'>gi|212549553|ref|NP_060090.2| interleukin enhancer-binding factor 3 isoform d [Homo sapiens]'	NaN	NaN	NaN	11	NaN	NaN	NaN	NaN	0	11	11
169	'>gi|231573214|ref|NP_056380.2| E3 ubiquitin-protein ligase listerin [Homo sapiens]'	NaN	NaN	11	NaN	NaN	NaN	NaN	NaN	0	11	11
170	'>gi|443497964|ref|NP_001263218.1| cAMP-dependent protein kinase type I-alpha regulatory subunit isoform a [Homo sapiens]'	NaN	NaN	NaN	NaN	11	NaN	NaN	NaN	0	11	11
171	'>gi|530366266|ref|XP_005273220.1| PREDICTED: polymeric immunoglobulin receptor isoform X1 [Homo sapiens]'	NaN	NaN	NaN	11	NaN	NaN	NaN	NaN	0	11	11
172	'>gi|544583486|ref|NP_001269802.1| E3 ubiquitin-protein ligase UBR5 isoform 2 [Homo sapiens]'	NaN	11	NaN	NaN	NaN	NaN	NaN	NaN	0	11	11
173	'>gi|642945631|ref|NP_001254479.2| titin isoform IC [Homo sapiens]'	NaN	11	NaN	NaN	NaN	NaN	NaN	NaN	0	11	11
174	'>gi|223278387|ref|NP_059118.2| calmodulin-like protein 5 [Homo sapiens]'	5	6	6	10	7	9	10	9	0	10	62
175	'>gi|34147630|ref|NP_003312.3| elongation factor Tu, mitochondrial precursor [Homo sapiens]'	7	10	8	6	9	3	8	NaN	0	10	51
176	'>gi|118197272|ref|NP_060506.5| autophagy-related protein 2 homolog B [Homo sapiens]'	NaN	5	10	NaN	5	NaN	NaN	NaN	0	10	20
177	'>gi|29826282|ref|NP_817092.1| protein phosphatase 1G [Homo sapiens]'	NaN	NaN	NaN	8	10	1	NaN	NaN	0	10	19
178	'>gi|24234686|ref|NP_694881.1| heat shock cognate 71 kDa protein isoform 2 [Homo sapiens]'	NaN	5	NaN	NaN	NaN	10	NaN	3	0	10	18
179	'>gi|301171467|ref|NP_001180345.1| ATP-dependent RNA helicase DDX3X isoform 2 [Homo sapiens]'	NaN	NaN	NaN	10	8	NaN	NaN	NaN	0	10	18
180	'>gi|48762920|ref|NP_002617.3| ATP-dependent 6-phosphofructokinase, liver type isoform b [Homo sapiens]'	NaN	NaN	NaN	10	8	NaN	NaN	NaN	0	10	18
181	'>gi|33636719|ref|NP_006342.2| mitochondrial import inner membrane translocase subunit TIM44 [Homo sapiens]'	NaN	NaN	NaN	NaN	7	10	NaN	NaN	0	10	17
182	'>gi|4506667|ref|NP_000993.1| 60S acidic ribosomal protein P0 [Homo sapiens]'	NaN	NaN	NaN	NaN	6	10	NaN	NaN	0	10	16
183	'>gi|117168248|ref|NP_057479.2| very-long-chain (3R)-3-hydroxyacyl-CoA dehydratase 3 [Homo sapiens]'	NaN	NaN	NaN	NaN	4	10	NaN	NaN	0	10	14
184	'>gi|386642862|ref|NP_001245367.1| threonine--tRNA ligase, cytoplasmic isoform 2 [Homo sapiens]'	NaN	NaN	NaN	10	1	NaN	NaN	NaN	0	10	11
185	'>gi|55956788|ref|NP_005372.2| nucleolin [Homo sapiens]'	NaN	NaN	NaN	10	1	NaN	NaN	NaN	0	10	11
186	'>gi|109148539|ref|NP_821158.2| gamma-glutamyltransferase 7 [Homo sapiens]'	NaN	NaN	NaN	10	NaN	NaN	NaN	NaN	0	10	10
187	'>gi|148612818|ref|NP_001091982.1| cGMP-dependent protein kinase 1 isoform 1 [Homo sapiens]'	NaN	NaN	NaN	NaN	NaN	NaN	NaN	10	0	10	10
188	'>gi|218749883|ref|NP_057303.2| endoplasmic reticulum mannosyl-oligosaccharide 1,2-alpha-mannosidase [Homo sapiens]'	NaN	NaN	NaN	10	NaN	NaN	NaN	NaN	0	10	10
189	'>gi|4503481|ref|NP_001395.1| elongation factor 1-gamma [Homo sapiens]'	NaN	NaN	NaN	NaN	10	NaN	NaN	NaN	0	10	10
190	'>gi|544063461|ref|NP_001269550.1| membrane-associated progesterone receptor component 1 isoform 2 [Homo sapiens]'	NaN	NaN	NaN	NaN	NaN	10	NaN	NaN	0	10	10
191	'>gi|612339310|ref|NP_056197.3| E3 ubiquitin-protein ligase HECTD1 [Homo sapiens]'	NaN	10	NaN	NaN	NaN	NaN	NaN	NaN	0	10	10
192	'>gi|83267868|ref|NP_001032584.1| dynein light chain 1, cytoplasmic [Homo sapiens]'	NaN	NaN	NaN	NaN	NaN	NaN	10	NaN	0	10	10
193	'>gi|94721239|ref|NP_038203.2| isoleucine--tRNA ligase, cytoplasmic [Homo sapiens]'	NaN	NaN	10	NaN	NaN	NaN	NaN	NaN	0	10	10
194	'>gi|6912286|ref|NP_036246.1| caspase-14 precursor [Homo sapiens]'	8	5	9	3	NaN	7	NaN	4	0	9	36
195	'>gi|578835525|ref|XP_006723678.1| PREDICTED: protein-glutamine gamma-glutamyltransferase E isoform X1 [Homo sapiens]'	3	3	9	6	2	4	2	2	0	9	31
196	'>gi|4505821|ref|NP_002643.1| prolactin-inducible protein precursor [Homo sapiens]'	2	NaN	2	1	NaN	9	3	3	0	9	20
197	'>gi|428977337|ref|NP_001258803.1| protein AAR2 homolog [Homo sapiens]'	NaN	NaN	NaN	NaN	9	6	NaN	NaN	0	9	15
198	'''>gi|511630715|ref|NP_001265432.1| dolichyl-diphosphooligosaccharide--protein glycosyltransferase subunit STT3A isoform a [Homo s...'' <Preview truncated at 128 characters>'	NaN	NaN	NaN	3	9	NaN	NaN	NaN	0	9	12
199	'>gi|23308577|ref|NP_006614.2| D-3-phosphoglycerate dehydrogenase [Homo sapiens]'	NaN	NaN	NaN	1	9	NaN	NaN	NaN	0	9	10
200	'>gi|5803227|ref|NP_006817.1| 14-3-3 protein theta [Homo sapiens]'	NaN	NaN	NaN	NaN	1	9	NaN	NaN	0	9	10
201	'>gi|109150431|ref|NP_060469.4| E3 ubiquitin-protein ligase RNF31 [Homo sapiens]'	NaN	NaN	9	NaN	NaN	NaN	NaN	NaN	0	9	9
202	'>gi|14389309|ref|NP_116093.1| tubulin alpha-1C chain [Homo sapiens]'	NaN	NaN	NaN	NaN	9	NaN	NaN	NaN	0	9	9
203	'>gi|154354966|ref|NP_001093640.1| mitochondrial inner membrane protein isoform 3 [Homo sapiens]'	NaN	NaN	NaN	9	NaN	NaN	NaN	NaN	0	9	9
204	'>gi|164607124|ref|NP_001106849.1| Fanconi anemia group I protein isoform 1 [Homo sapiens]'	NaN	NaN	9	NaN	NaN	NaN	NaN	NaN	0	9	9
205	'>gi|194578888|ref|NP_001124147.1| calmegin precursor [Homo sapiens]'	NaN	NaN	NaN	9	NaN	NaN	NaN	NaN	0	9	9
206	'>gi|281182727|ref|NP_001162582.1| protein SCO2 homolog, mitochondrial precursor [Homo sapiens]'	NaN	NaN	NaN	NaN	NaN	9	NaN	NaN	0	9	9
207	'>gi|33469968|ref|NP_005907.3| DNA replication licensing factor MCM7 isoform 1 [Homo sapiens]'	NaN	NaN	NaN	9	NaN	NaN	NaN	NaN	0	9	9
208	'>gi|355594753|ref|NP_001822.3| clusterin preproprotein [Homo sapiens]'	NaN	NaN	NaN	NaN	NaN	9	NaN	NaN	0	9	9
209	'>gi|47458811|ref|NP_998814.1| sideroflexin-4 [Homo sapiens]'	NaN	NaN	NaN	NaN	NaN	9	NaN	NaN	0	9	9
210	'>gi|545478189|ref|NP_001269913.1| FERM, RhoGEF and pleckstrin domain-containing protein 2 isoform c [Homo sapiens]'	NaN	NaN	NaN	9	NaN	NaN	NaN	NaN	0	9	9
211	'>gi|5802984|ref|NP_006867.1| N-acetyllactosaminide beta-1,3-N-acetylglucosaminyltransferase [Homo sapiens]'	NaN	NaN	NaN	NaN	9	NaN	NaN	NaN	0	9	9
212	'>gi|58761484|ref|NP_001008800.1| T-complex protein 1 subunit gamma isoform c [Homo sapiens]'	NaN	NaN	NaN	9	NaN	NaN	NaN	NaN	0	9	9
213	'>gi|21614544|ref|NP_002955.2| protein S100-A8 [Homo sapiens]'	5	2	NaN	8	NaN	4	3	NaN	0	8	22
214	'>gi|219879806|ref|NP_001137378.1| TRAF-type zinc finger domain-containing protein 1 [Homo sapiens]'	NaN	NaN	NaN	8	7	NaN	NaN	NaN	0	8	15
215	'>gi|225543215|ref|NP_001139438.1| antigen KI-67 isoform 2 [Homo sapiens]'	NaN	7	8	NaN	NaN	NaN	NaN	NaN	0	8	15
216	'>gi|24234688|ref|NP_004125.3| stress-70 protein, mitochondrial precursor [Homo sapiens]'	NaN	NaN	NaN	8	6	NaN	NaN	NaN	0	8	14
217	'>gi|4502163|ref|NP_001638.1| apolipoprotein D precursor [Homo sapiens]'	3	2	NaN	NaN	NaN	8	NaN	1	0	8	14
218	'>gi|7661968|ref|NP_055481.1| clathrin interactor 1 isoform 2 [Homo sapiens]'	NaN	NaN	NaN	8	6	NaN	NaN	NaN	0	8	14
219	'>gi|21327701|ref|NP_631961.1| TATA-binding protein-associated factor 2N isoform 1 [Homo sapiens]'	NaN	NaN	NaN	8	5	NaN	NaN	NaN	0	8	13
220	'>gi|281604138|ref|NP_001164015.1| serine/threonine-protein phosphatase PGAM5, mitochondrial isoform 2 [Homo sapiens]'	NaN	NaN	NaN	NaN	5	8	NaN	NaN	0	8	13
221	'>gi|14210536|ref|NP_115914.1| tubulin beta-6 chain [Homo sapiens]'	1	NaN	NaN	1	8	1	NaN	NaN	0	8	11
222	'>gi|42734503|ref|NP_976240.1| caprin-1 isoform 2 [Homo sapiens]'	NaN	NaN	3	8	NaN	NaN	NaN	NaN	0	8	11
223	'>gi|50592994|ref|NP_003320.2| thioredoxin isoform 1 [Homo sapiens]'	NaN	NaN	NaN	NaN	NaN	2	8	1	0	8	11
224	'>gi|154350241|ref|NP_065073.3| brefeldin A-inhibited guanine nucleotide-exchange protein 3 [Homo sapiens]'	NaN	8	2	NaN	NaN	NaN	NaN	NaN	0	8	10
225	'>gi|38327552|ref|NP_938405.1| ras GTPase-activating protein-binding protein 1 [Homo sapiens]'	NaN	NaN	NaN	2	8	NaN	NaN	NaN	0	8	10
226	'>gi|4502101|ref|NP_000691.1| annexin A1 [Homo sapiens]'	NaN	NaN	NaN	2	NaN	8	NaN	NaN	0	8	10
227	'>gi|24234683|ref|NP_004642.2| ubiquitin carboxyl-terminal hydrolase 11 [Homo sapiens]'	NaN	NaN	1	8	NaN	NaN	NaN	NaN	0	8	9
228	'>gi|254553334|ref|NP_001156956.1| DDB1- and CUL4-associated factor 11 isoform 1 [Homo sapiens]'	NaN	NaN	NaN	1	8	NaN	NaN	NaN	0	8	9
229	'>gi|4503143|ref|NP_001900.1| cathepsin D preproprotein [Homo sapiens]'	NaN	NaN	NaN	NaN	NaN	8	NaN	1	0	8	9
230	'>gi|5031863|ref|NP_005558.1| galectin-3-binding protein precursor [Homo sapiens]'	NaN	NaN	NaN	8	1	NaN	NaN	NaN	0	8	9
231	'>gi|157388965|ref|NP_689483.3| schlafen family member 11 [Homo sapiens]'	NaN	NaN	NaN	8	NaN	NaN	NaN	NaN	0	8	8
232	'>gi|19920317|ref|NP_006816.2| cytoskeleton-associated protein 4 [Homo sapiens]'	NaN	NaN	NaN	NaN	8	NaN	NaN	NaN	0	8	8
233	'>gi|221307568|ref|NP_001138295.1| C-myc promoter-binding protein isoform 1 [Homo sapiens]'	NaN	NaN	8	NaN	NaN	NaN	NaN	NaN	0	8	8
234	'>gi|224831257|ref|NP_055467.3| importin-13 [Homo sapiens]'	NaN	NaN	NaN	8	NaN	NaN	NaN	NaN	0	8	8
235	'>gi|4506209|ref|NP_002794.1| 26S protease regulatory subunit 7 isoform 1 [Homo sapiens]'	NaN	NaN	NaN	NaN	8	NaN	NaN	NaN	0	8	8
236	'>gi|4758340|ref|NP_004452.1| phenylalanine--tRNA ligase alpha subunit [Homo sapiens]'	NaN	NaN	NaN	NaN	8	NaN	NaN	NaN	0	8	8
237	'>gi|4759068|ref|NP_004580.1| protein SCO1 homolog, mitochondrial [Homo sapiens]'	NaN	NaN	NaN	NaN	NaN	8	NaN	NaN	0	8	8
238	'>gi|4826908|ref|NP_005018.1| phosphatidylinositol 3-kinase regulatory subunit beta [Homo sapiens]'	NaN	NaN	NaN	8	NaN	NaN	NaN	NaN	0	8	8
239	'>gi|530362743|ref|XP_005270979.1| PREDICTED: protein Hook homolog 1 isoform X1 [Homo sapiens]'	NaN	NaN	NaN	8	NaN	NaN	NaN	NaN	0	8	8
240	'>gi|6005824|ref|NP_009121.1| SEC23-interacting protein [Homo sapiens]'	NaN	NaN	8	NaN	NaN	NaN	NaN	NaN	0	8	8
241	'>gi|8922532|ref|NP_060615.1| regulator of microtubule dynamics protein 3 [Homo sapiens]'	NaN	NaN	NaN	NaN	8	NaN	NaN	NaN	0	8	8
242	'>gi|33239451|ref|NP_872590.1| proliferating cell nuclear antigen [Homo sapiens]'	NaN	NaN	NaN	NaN	1	5	7	NaN	0	7	13
243	'''>gi|530414178|ref|XP_005266746.1| PREDICTED: mitochondrial import inner membrane translocase subunit Tim21 isoform X1 [Homo sapi...'' <Preview truncated at 128 characters>'	NaN	NaN	NaN	NaN	NaN	7	6	NaN	0	7	13
244	'>gi|156071462|ref|NP_001627.2| ADP/ATP translocase 3 [Homo sapiens]'	1	NaN	2	NaN	2	7	NaN	NaN	0	7	12
245	'>gi|157384998|ref|NP_002325.2| low-density lipoprotein receptor-related protein 4 precursor [Homo sapiens]'	NaN	5	7	NaN	NaN	NaN	NaN	NaN	0	7	12
246	'>gi|37693993|ref|NP_002504.2| nucleoside diphosphate kinase 3 precursor [Homo sapiens]'	NaN	NaN	NaN	NaN	NaN	5	7	NaN	0	7	12
247	'>gi|201860300|ref|NP_003968.2| AH receptor-interacting protein [Homo sapiens]'	NaN	NaN	NaN	1	3	7	NaN	NaN	0	7	11
248	'>gi|38202257|ref|NP_938148.1| neutral alpha-glucosidase AB isoform 2 precursor [Homo sapiens]'	NaN	NaN	4	7	NaN	NaN	NaN	NaN	0	7	11
249	'>gi|224586884|ref|NP_001138898.1| Y-box-binding protein 3 isoform b [Homo sapiens]'	NaN	NaN	NaN	3	7	NaN	NaN	NaN	0	7	10
250	'>gi|4506195|ref|NP_002785.1| proteasome subunit beta type-2 isoform 1 [Homo sapiens]'	NaN	NaN	NaN	NaN	NaN	3	7	NaN	0	7	10
251	'>gi|197304786|ref|NP_001127854.1| IQ motif and SEC7 domain-containing protein 1 isoform a [Homo sapiens]'	NaN	NaN	7	2	NaN	NaN	NaN	NaN	0	7	9
252	'>gi|354983495|ref|NP_001238979.1| protein-L-isoaspartate(D-aspartate) O-methyltransferase isoform 3 [Homo sapiens]'	NaN	NaN	NaN	NaN	7	2	NaN	NaN	0	7	9
253	'>gi|50345988|ref|NP_001001973.1| ATP synthase subunit gamma, mitochondrial isoform L (liver) precursor [Homo sapiens]'	NaN	NaN	NaN	NaN	2	7	NaN	NaN	0	7	9
254	'>gi|9966881|ref|NP_065134.1| nuclear pore complex protein Nup107 [Homo sapiens]'	NaN	NaN	2	7	NaN	NaN	NaN	NaN	0	7	9
255	'>gi|4885487|ref|NP_005430.1| myeloid leukemia factor 2 [Homo sapiens]'	NaN	NaN	NaN	NaN	1	7	NaN	NaN	0	7	8
256	'>gi|145580631|ref|NP_859052.3| sulfhydryl oxidase 2 precursor [Homo sapiens]'	NaN	NaN	NaN	7	NaN	NaN	NaN	NaN	0	7	7
257	'>gi|156523968|ref|NP_001609.2| poly [ADP-ribose] polymerase 1 [Homo sapiens]'	NaN	NaN	7	NaN	NaN	NaN	NaN	NaN	0	7	7
258	'>gi|193083110|ref|NP_001122384.1| poly(rC)-binding protein 2 isoform e [Homo sapiens]'	NaN	NaN	NaN	NaN	NaN	7	NaN	NaN	0	7	7
259	'>gi|209954811|ref|NP_001129628.1| zinc finger protein 507 [Homo sapiens]'	NaN	NaN	7	NaN	NaN	NaN	NaN	NaN	0	7	7
260	'>gi|254692934|ref|NP_001157108.1| general transcription factor II-I isoform 5 [Homo sapiens]'	NaN	NaN	7	NaN	NaN	NaN	NaN	NaN	0	7	7
261	'>gi|324021738|ref|NP_001191230.1| amyloid beta A4 protein isoform h precursor [Homo sapiens]'	NaN	NaN	7	NaN	NaN	NaN	NaN	NaN	0	7	7
262	'>gi|38569394|ref|NP_003631.2| elongator complex protein 1 [Homo sapiens]'	NaN	NaN	7	NaN	NaN	NaN	NaN	NaN	0	7	7
263	'>gi|386869503|ref|NP_001247435.1| 40S ribosomal protein S3 isoform 2 [Homo sapiens]'	NaN	NaN	NaN	NaN	NaN	7	NaN	NaN	0	7	7
264	'>gi|40807482|ref|NP_149974.2| BPI fold-containing family B member 1 precursor [Homo sapiens]'	NaN	NaN	NaN	7	NaN	NaN	NaN	NaN	0	7	7
265	'>gi|4502167|ref|NP_000475.1| amyloid beta A4 protein isoform a precursor [Homo sapiens]'	NaN	NaN	NaN	7	NaN	NaN	NaN	NaN	0	7	7
266	'>gi|4507401|ref|NP_003192.1| transcription factor A, mitochondrial isoform 1 precursor [Homo sapiens]'	NaN	NaN	NaN	NaN	NaN	7	NaN	NaN	0	7	7
267	'>gi|4885399|ref|NP_005436.1| structural maintenance of chromosomes protein 3 [Homo sapiens]'	NaN	NaN	7	NaN	NaN	NaN	NaN	NaN	0	7	7
268	'>gi|527317371|ref|NP_001268392.1| structural maintenance of chromosomes protein 1A isoform 2 [Homo sapiens]'	NaN	NaN	7	NaN	NaN	NaN	NaN	NaN	0	7	7
269	'>gi|62241042|ref|NP_004437.2| bifunctional glutamate/proline--tRNA ligase [Homo sapiens]'	NaN	NaN	7	NaN	NaN	NaN	NaN	NaN	0	7	7
270	'>gi|66472382|ref|NP_009115.2| nischarin isoform 1 [Homo sapiens]'	NaN	NaN	7	NaN	NaN	NaN	NaN	NaN	0	7	7
271	'>gi|67782356|ref|NP_001255.3| corneodesmosin precursor [Homo sapiens]'	6	5	4	4	3	5	4	3	0	6	34
272	'>gi|13435361|ref|NP_077739.1| desmocollin-1 isoform Dsc1a preproprotein [Homo sapiens]'	3	3	6	5	3	5	3	3	0	6	31
273	'>gi|60097902|ref|NP_002007.1| filaggrin [Homo sapiens]'	4	3	4	5	NaN	6	5	1	0	6	28
274	'>gi|50845388|ref|NP_001002858.1| annexin A2 isoform 1 [Homo sapiens]'	4	6	5	3	1	5	2	NaN	0	6	26
275	'>gi|77539758|ref|NP_001029249.1| histone H4 [Homo sapiens]'	3	1	NaN	3	NaN	6	2	2	0	6	17
276	'>gi|381342476|ref|NP_001244222.1| heterogeneous nuclear ribonucleoprotein H [Homo sapiens]'	NaN	3	1	6	NaN	2	3	NaN	0	6	15
277	'>gi|612407827|ref|NP_055186.3| A-kinase anchor protein 8-like isoform 1 [Homo sapiens]'	NaN	NaN	4	3	6	NaN	NaN	NaN	0	6	13
278	'>gi|291621647|ref|NP_006311.2| membrane-associated progesterone receptor component 2 [Homo sapiens]'	NaN	NaN	NaN	NaN	NaN	5	6	NaN	0	6	11
279	'>gi|4505255|ref|NP_002433.1| RNA-binding protein Musashi homolog 1 [Homo sapiens]'	NaN	NaN	NaN	NaN	5	6	NaN	NaN	0	6	11
280	'>gi|4557894|ref|NP_000230.1| lysozyme C precursor [Homo sapiens]'	1	1	NaN	6	NaN	NaN	2	1	0	6	11
281	'>gi|169404009|ref|NP_003135.2| translocon-associated protein subunit alpha isoform 1 precursor [Homo sapiens]'	NaN	NaN	NaN	1	3	6	NaN	NaN	0	6	10
282	'>gi|251831110|ref|YP_003024029.1| cytochrome c oxidase subunit II (mitochondrion) [Homo sapiens]'	NaN	NaN	NaN	NaN	NaN	4	6	NaN	0	6	10
283	'>gi|41350216|ref|NP_061982.3| chitobiosyldiphosphodolichol beta-mannosyltransferase [Homo sapiens]'	NaN	NaN	NaN	NaN	6	4	NaN	NaN	0	6	10
284	'>gi|10835063|ref|NP_002511.1| nucleophosmin isoform 1 [Homo sapiens]'	3	NaN	NaN	NaN	NaN	6	NaN	NaN	0	6	9
285	'>gi|526253066|ref|NP_001268223.1| zinc finger protein 281 isoform 2 [Homo sapiens]'	NaN	NaN	3	6	NaN	NaN	NaN	NaN	0	6	9
286	'>gi|24475816|ref|NP_612510.1| very-long-chain enoyl-CoA reductase [Homo sapiens]'	NaN	NaN	NaN	NaN	1	6	1	NaN	0	6	8
287	'>gi|30089954|ref|NP_056541.2| DDB1- and CUL4-associated factor 8 [Homo sapiens]'	NaN	NaN	NaN	2	6	NaN	NaN	NaN	0	6	8
288	'>gi|31881785|ref|NP_079023.2| Hermansky-Pudlak syndrome 6 protein [Homo sapiens]'	NaN	NaN	NaN	6	2	NaN	NaN	NaN	0	6	8
289	'>gi|4827067|ref|NP_005087.1| zinc finger MYM-type protein 3 isoform 1 [Homo sapiens]'	NaN	NaN	6	2	NaN	NaN	NaN	NaN	0	6	8
290	'>gi|94536866|ref|NP_660295.2| zymogen granule protein 16 homolog B precursor [Homo sapiens]'	NaN	NaN	NaN	2	NaN	6	NaN	NaN	0	6	8
291	'>gi|108936958|ref|NP_005819.3| DDB1- and CUL4-associated factor 7 [Homo sapiens]'	NaN	NaN	NaN	NaN	1	6	NaN	NaN	0	6	7
292	'>gi|21327708|ref|NP_631946.1| nucleosome assembly protein 1-like 1 [Homo sapiens]'	NaN	NaN	NaN	1	6	NaN	NaN	NaN	0	6	7
293	'>gi|4506711|ref|NP_001021.1| 40S ribosomal protein S27 [Homo sapiens]'	NaN	NaN	NaN	NaN	NaN	1	6	NaN	0	6	7
294	'>gi|54112121|ref|NP_036558.3| splicing factor 3B subunit 3 [Homo sapiens]'	NaN	1	6	NaN	NaN	NaN	NaN	NaN	0	6	7
295	'>gi|145580595|ref|NP_689762.2| coiled-coil domain-containing protein 112 isoform 2 [Homo sapiens]'	NaN	NaN	NaN	NaN	6	NaN	NaN	NaN	0	6	6
296	'>gi|154355000|ref|NP_003676.2| far upstream element-binding protein 2 [Homo sapiens]'	NaN	NaN	NaN	6	NaN	NaN	NaN	NaN	0	6	6
297	'>gi|156104872|ref|NP_006485.2| ETS domain-containing transcription factor ERF isoform 1 [Homo sapiens]'	NaN	NaN	NaN	6	NaN	NaN	NaN	NaN	0	6	6
298	'>gi|156938331|ref|NP_060392.3| pre-mRNA-processing factor 39 [Homo sapiens]'	NaN	NaN	NaN	6	NaN	NaN	NaN	NaN	0	6	6
299	'>gi|157311635|ref|NP_940890.3| protein FAM83H [Homo sapiens]'	NaN	NaN	6	NaN	NaN	NaN	NaN	NaN	0	6	6
300	'>gi|166295173|ref|NP_060710.3| kin of IRRE-like protein 1 isoform 1 precursor [Homo sapiens]'	NaN	NaN	NaN	6	NaN	NaN	NaN	NaN	0	6	6
301	'>gi|169790923|ref|NP_000245.2| methionine synthase isoform 1 [Homo sapiens]'	NaN	NaN	6	NaN	NaN	NaN	NaN	NaN	0	6	6
302	'>gi|182508169|ref|NP_003864.4| neuropilin-1 isoform a precursor [Homo sapiens]'	NaN	NaN	6	NaN	NaN	NaN	NaN	NaN	0	6	6
303	'>gi|183603929|ref|NP_001116827.1| serine/threonine-protein phosphatase 6 catalytic subunit isoform a [Homo sapiens]'	NaN	NaN	NaN	NaN	NaN	6	NaN	NaN	0	6	6
304	'>gi|21359867|ref|NP_001907.2| cytochrome c1, heme protein, mitochondrial precursor [Homo sapiens]'	NaN	NaN	NaN	NaN	NaN	6	NaN	NaN	0	6	6
305	'>gi|215490089|ref|NP_005861.2| histone deacetylase complex subunit SAP18 [Homo sapiens]'	NaN	NaN	NaN	NaN	NaN	6	NaN	NaN	0	6	6
306	'>gi|24308324|ref|NP_115604.1| fatty acyl-CoA reductase 1 [Homo sapiens]'	NaN	NaN	NaN	NaN	6	NaN	NaN	NaN	0	6	6
307	'>gi|24430139|ref|NP_056355.2| RNA polymerase II-associated protein 1 [Homo sapiens]'	NaN	NaN	6	NaN	NaN	NaN	NaN	NaN	0	6	6
308	'>gi|24497453|ref|NP_002523.2| nuclear pore complex protein Nup88 [Homo sapiens]'	NaN	NaN	NaN	6	NaN	NaN	NaN	NaN	0	6	6
309	'>gi|25777602|ref|NP_002799.3| 26S proteasome non-ATPase regulatory subunit 2 isoform 1 [Homo sapiens]'	NaN	NaN	NaN	6	NaN	NaN	NaN	NaN	0	6	6
310	'>gi|260763955|ref|NP_057049.5| NADH dehydrogenase [ubiquinone] 1 alpha subcomplex subunit 13 [Homo sapiens]'	NaN	NaN	NaN	NaN	NaN	NaN	6	NaN	0	6	6
311	'>gi|262206280|ref|NP_003306.3| dnaJ homolog subfamily C member 7 isoform 1 [Homo sapiens]'	NaN	NaN	NaN	NaN	6	NaN	NaN	NaN	0	6	6
312	'>gi|266453768|ref|NP_001160160.1| ATP-dependent 6-phosphofructokinase, muscle type isoform 2 [Homo sapiens]'	NaN	NaN	NaN	6	NaN	NaN	NaN	NaN	0	6	6
313	'>gi|312836798|ref|NP_001186125.1| armadillo repeat-containing protein 6 isoform 1 [Homo sapiens]'	NaN	NaN	NaN	NaN	6	NaN	NaN	NaN	0	6	6
314	'>gi|327365361|ref|NP_056288.2| HEAT repeat-containing protein 5A [Homo sapiens]'	NaN	NaN	NaN	NaN	NaN	NaN	6	NaN	0	6	6
315	'>gi|33188445|ref|NP_036222.3| microtubule-actin cross-linking factor 1 [Homo sapiens]'	6	NaN	NaN	NaN	NaN	NaN	NaN	NaN	0	6	6
316	'>gi|33354281|ref|NP_877499.1| sodium-dependent neutral amino acid transporter B(0)AT2 isoform 1 [Homo sapiens]'	NaN	NaN	NaN	6	NaN	NaN	NaN	NaN	0	6	6
317	'>gi|390608669|ref|NP_001254629.1| prohibitin-2 isoform 3 [Homo sapiens]'	NaN	NaN	NaN	NaN	NaN	6	NaN	NaN	0	6	6
318	'>gi|39995082|ref|NP_060225.4| tRNA (cytosine(34)-C(5))-methyltransferase isoform 1 [Homo sapiens]'	NaN	NaN	NaN	6	NaN	NaN	NaN	NaN	0	6	6
319	'>gi|40254446|ref|NP_003469.2| cullin-5 [Homo sapiens]'	NaN	NaN	NaN	6	NaN	NaN	NaN	NaN	0	6	6
320	'>gi|4503363|ref|NP_003850.1| dolichol-phosphate mannosyltransferase subunit 1 [Homo sapiens]'	NaN	NaN	NaN	NaN	NaN	6	NaN	NaN	0	6	6
321	'>gi|4505211|ref|NP_002419.1| matrix metalloproteinase-15 preproprotein [Homo sapiens]'	NaN	NaN	NaN	NaN	6	NaN	NaN	NaN	0	6	6
322	'>gi|4507873|ref|NP_003363.1| prefoldin subunit 3 [Homo sapiens]'	NaN	NaN	NaN	NaN	NaN	6	NaN	NaN	0	6	6
323	'>gi|46519147|ref|NP_060217.1| ankyrin repeat and KH domain-containing protein 1 isoform 1 [Homo sapiens]'	NaN	6	NaN	NaN	NaN	NaN	NaN	NaN	0	6	6
324	'''>gi|4758786|ref|NP_004541.1| NADH dehydrogenase [ubiquinone] iron-sulfur protein 2, mitochondrial isoform 1 precursor [Homo sapi...'' <Preview truncated at 128 characters>'	NaN	NaN	NaN	NaN	6	NaN	NaN	NaN	0	6	6
325	'>gi|530388540|ref|XP_005251347.1| PREDICTED: transcription elongation factor B polypeptide 1 isoform X1 [Homo sapiens]'	NaN	NaN	NaN	NaN	NaN	NaN	6	NaN	0	6	6
326	'>gi|530420483|ref|XP_005261850.1| PREDICTED: uncharacterized protein KIAA1671 isoform X1 [Homo sapiens]'	NaN	NaN	6	NaN	NaN	NaN	NaN	NaN	0	6	6
327	'>gi|5453690|ref|NP_006136.1| dnaJ homolog subfamily B member 1 isoform 1 [Homo sapiens]'	NaN	NaN	NaN	NaN	6	NaN	NaN	NaN	0	6	6
328	'>gi|5454084|ref|NP_006406.1| serine palmitoyltransferase 1 isoform a [Homo sapiens]'	NaN	NaN	NaN	NaN	6	NaN	NaN	NaN	0	6	6
329	'>gi|568215065|ref|NP_001274745.1| ubiquitin-associated protein 2-like isoform d [Homo sapiens]'	NaN	NaN	6	NaN	NaN	NaN	NaN	NaN	0	6	6
330	'>gi|57222565|ref|NP_001009552.1| serine/threonine-protein phosphatase 2A catalytic subunit beta isoform [Homo sapiens]'	NaN	NaN	NaN	NaN	NaN	6	NaN	NaN	0	6	6
331	'>gi|578832148|ref|XP_006722395.1| PREDICTED: centrosomal protein of 192 kDa isoform X12 [Homo sapiens]'	NaN	NaN	6	NaN	NaN	NaN	NaN	NaN	0	6	6
332	'>gi|578834927|ref|XP_006723457.1| PREDICTED: uncharacterized aarF domain-containing protein kinase 4 isoform X8 [Homo sapiens]'	NaN	NaN	NaN	NaN	6	NaN	NaN	NaN	0	6	6
333	'>gi|7657508|ref|NP_055063.1| E3 ubiquitin-protein ligase RBX1 [Homo sapiens]'	NaN	NaN	NaN	NaN	NaN	NaN	6	NaN	0	6	6
334	'>gi|88759348|ref|NP_078822.3| RING finger protein 219 [Homo sapiens]'	NaN	NaN	NaN	6	NaN	NaN	NaN	NaN	0	6	6
335	'>gi|88900507|ref|NP_001034708.1| protein arginine N-methyltransferase 5 isoform b [Homo sapiens]'	NaN	NaN	NaN	NaN	6	NaN	NaN	NaN	0	6	6
336	'>gi|17998551|ref|NP_536722.1| serpin B12 [Homo sapiens]'	3	5	4	3	3	5	1	4	0	5	28
337	'>gi|346986435|ref|NP_001231367.1| arginase-1 isoform 1 [Homo sapiens]'	3	4	3	3	NaN	5	4	5	0	5	27
338	'>gi|4557014|ref|NP_001743.1| catalase [Homo sapiens]'	4	5	4	2	NaN	4	NaN	4	0	5	23
339	'>gi|258613943|ref|NP_001158222.1| aspartyl/asparaginyl beta-hydroxylase isoform f [Homo sapiens]'	NaN	NaN	4	5	4	NaN	NaN	NaN	0	5	13
340	'>gi|148539848|ref|NP_077741.2| desmocollin-3 isoform Dsc3b preproprotein [Homo sapiens]'	3	NaN	5	3	NaN	NaN	NaN	1	0	5	12
341	'>gi|24797067|ref|NP_002107.3| HLA class I histocompatibility antigen, A-1 alpha chain precursor [Homo sapiens]'	NaN	NaN	NaN	2	4	5	NaN	NaN	0	5	11
342	'>gi|29171705|ref|NP_803182.1| melanoma-associated antigen D2 [Homo sapiens]'	NaN	NaN	NaN	5	5	NaN	NaN	NaN	0	5	10
343	'>gi|31377562|ref|NP_060115.3| HAUS augmin-like complex subunit 6 isoform 1 [Homo sapiens]'	NaN	NaN	5	5	NaN	NaN	NaN	NaN	0	5	10
344	'>gi|325301078|ref|NP_001191456.1| translocon-associated protein subunit delta isoform 3 precursor [Homo sapiens]'	NaN	NaN	NaN	NaN	1	5	4	NaN	0	5	10
345	'>gi|14043070|ref|NP_112420.1| heterogeneous nuclear ribonucleoprotein A1 isoform b [Homo sapiens]'	NaN	NaN	NaN	NaN	4	5	NaN	NaN	0	5	9
346	'>gi|217330646|ref|NP_006704.3| activated RNA polymerase II transcriptional coactivator p15 [Homo sapiens]'	NaN	NaN	NaN	NaN	NaN	4	5	NaN	0	5	9
347	'>gi|557357733|ref|NP_001273433.1| heat shock protein 105 kDa isoform 3 [Homo sapiens]'	NaN	NaN	4	5	NaN	NaN	NaN	NaN	0	5	9
348	'>gi|53829376|ref|NP_001005476.1| plakophilin-4 isoform b [Homo sapiens]'	NaN	NaN	5	3	NaN	NaN	NaN	NaN	0	5	8
349	'>gi|149944680|ref|NP_056117.1| HAUS augmin-like complex subunit 5 [Homo sapiens]'	NaN	NaN	NaN	2	5	NaN	NaN	NaN	0	5	7
350	'>gi|153085470|ref|NP_001093139.1| HIG1 domain family member 1A, mitochondrial isoform b [Homo sapiens]'	NaN	NaN	NaN	NaN	NaN	2	5	NaN	0	5	7
351	'>gi|4506671|ref|NP_000995.1| 60S acidic ribosomal protein P2 [Homo sapiens]'	NaN	NaN	NaN	NaN	NaN	2	5	NaN	0	5	7
352	'>gi|5729875|ref|NP_006658.1| membrane-associated progesterone receptor component 1 isoform 1 [Homo sapiens]'	NaN	NaN	NaN	NaN	2	NaN	5	NaN	0	5	7
353	'>gi|7657369|ref|NP_055037.1| NADH dehydrogenase [ubiquinone] 1 alpha subcomplex subunit 8 [Homo sapiens]'	NaN	NaN	NaN	NaN	NaN	2	5	NaN	0	5	7
354	'>gi|108773787|ref|NP_000312.2| retinoblastoma-associated protein [Homo sapiens]'	NaN	NaN	NaN	5	1	NaN	NaN	NaN	0	5	6
355	'>gi|21361114|ref|NP_003553.2| mitochondrial 2-oxoglutarate/malate carrier protein isoform 1 [Homo sapiens]'	NaN	NaN	NaN	NaN	1	5	NaN	NaN	0	5	6
356	'>gi|296434287|ref|NP_001171809.1| protocadherin-19 isoform c precursor [Homo sapiens]'	NaN	NaN	5	1	NaN	NaN	NaN	NaN	0	5	6
357	'>gi|327315343|ref|NP_001192157.1| sortilin isoform 2 [Homo sapiens]'	NaN	NaN	1	5	NaN	NaN	NaN	NaN	0	5	6
358	'>gi|4504341|ref|NP_003633.1| histone acetyltransferase type B catalytic subunit [Homo sapiens]'	NaN	NaN	NaN	NaN	5	1	NaN	NaN	0	5	6
359	'>gi|4506695|ref|NP_001013.1| 40S ribosomal protein S19 [Homo sapiens]'	NaN	NaN	NaN	NaN	NaN	1	5	NaN	0	5	6
360	'>gi|5174447|ref|NP_006089.1| guanine nucleotide-binding protein subunit beta-2-like 1 [Homo sapiens]'	NaN	NaN	NaN	NaN	1	5	NaN	NaN	0	5	6
361	'>gi|52630342|ref|NP_002108.4| HLA class I histocompatibility antigen, Cw-1 alpha chain precursor [Homo sapiens]'	NaN	NaN	NaN	NaN	5	1	NaN	NaN	0	5	6
362	'>gi|9845502|ref|NP_002286.2| 40S ribosomal protein SA [Homo sapiens]'	NaN	NaN	NaN	NaN	5	1	NaN	NaN	0	5	6
363	'>gi|10835242|ref|NP_006249.1| cGMP-dependent protein kinase 1 isoform 2 [Homo sapiens]'	NaN	5	NaN	NaN	NaN	NaN	NaN	NaN	0	5	5
364	'>gi|110578649|ref|NP_065976.2| VWFA and cache domain-containing protein 1 isoform 1 [Homo sapiens]'	NaN	NaN	5	NaN	NaN	NaN	NaN	NaN	0	5	5
365	'>gi|12056465|ref|NP_001427.2| rRNA 2''-O-methyltransferase fibrillarin [Homo sapiens]'	NaN	NaN	NaN	NaN	NaN	5	NaN	NaN	0	5	5
366	'>gi|133925811|ref|NP_002261.3| transportin-1 isoform 1 [Homo sapiens]'	NaN	NaN	NaN	5	NaN	NaN	NaN	NaN	0	5	5
367	'>gi|14043022|ref|NP_004981.2| methionine--tRNA ligase, cytoplasmic [Homo sapiens]'	NaN	NaN	NaN	5	NaN	NaN	NaN	NaN	0	5	5
368	'>gi|14110420|ref|NP_112738.1| heterogeneous nuclear ribonucleoprotein D0 isoform a [Homo sapiens]'	NaN	NaN	NaN	NaN	5	NaN	NaN	NaN	0	5	5
369	'>gi|149999606|ref|NP_006293.2| mannosyl-oligosaccharide glucosidase isoform 1 [Homo sapiens]'	NaN	NaN	NaN	5	NaN	NaN	NaN	NaN	0	5	5
370	'>gi|150418002|ref|NP_002114.3| HLA class II histocompatibility antigen, DQ beta 1 chain isoform 1 precursor [Homo sapiens]'	NaN	NaN	NaN	NaN	NaN	5	NaN	NaN	0	5	5
371	'>gi|169790839|ref|NP_004163.3| excitatory amino acid transporter 1 isoform 1 [Homo sapiens]'	NaN	NaN	NaN	NaN	5	NaN	NaN	NaN	0	5	5
372	'>gi|19923669|ref|NP_005056.3| protein sel-1 homolog 1 isoform 1 precursor [Homo sapiens]'	NaN	NaN	NaN	5	NaN	NaN	NaN	NaN	0	5	5
373	'''>gi|209413738|ref|NP_001129243.1| dolichyl-diphosphooligosaccharide--protein glycosyltransferase subunit 2 isoform 2 precursor [...'' <Preview truncated at 128 characters>'	NaN	NaN	NaN	NaN	5	NaN	NaN	NaN	0	5	5
374	'>gi|21328448|ref|NP_647539.1| 14-3-3 protein beta/alpha [Homo sapiens]'	NaN	NaN	NaN	NaN	NaN	5	NaN	NaN	0	5	5
375	'>gi|21536320|ref|NP_653333.1| heterogeneous nuclear ribonucleoprotein U-like protein 1 isoform d [Homo sapiens]'	NaN	NaN	NaN	5	NaN	NaN	NaN	NaN	0	5	5
376	'>gi|22035554|ref|NP_663722.1| amyloid beta A4 precursor protein-binding family B member 1 isoform b [Homo sapiens]'	NaN	NaN	NaN	5	NaN	NaN	NaN	NaN	0	5	5
377	'>gi|22748937|ref|NP_065801.1| exportin-5 [Homo sapiens]'	NaN	NaN	5	NaN	NaN	NaN	NaN	NaN	0	5	5
378	'>gi|23308607|ref|NP_110416.1| minor histocompatibility antigen H13 isoform 1 [Homo sapiens]'	NaN	NaN	NaN	NaN	5	NaN	NaN	NaN	0	5	5
379	'>gi|24797106|ref|NP_055428.1| FAS-associated factor 2 [Homo sapiens]'	NaN	NaN	NaN	NaN	5	NaN	NaN	NaN	0	5	5
380	'>gi|299758464|ref|NP_001139685.2| TBC1 domain family member 15 isoform 3 [Homo sapiens]'	NaN	NaN	NaN	NaN	5	NaN	NaN	NaN	0	5	5
381	'>gi|31657129|ref|NP_036525.1| phosphoribosylformylglycinamidine synthase [Homo sapiens]'	NaN	NaN	5	NaN	NaN	NaN	NaN	NaN	0	5	5
382	'>gi|321267511|ref|NP_001189431.1| protein NipSnap homolog 1 isoform 2 [Homo sapiens]'	NaN	NaN	NaN	NaN	NaN	5	NaN	NaN	0	5	5
383	'>gi|33469919|ref|NP_005905.2| DNA replication licensing factor MCM4 [Homo sapiens]'	NaN	NaN	NaN	5	NaN	NaN	NaN	NaN	0	5	5
384	'>gi|33946327|ref|NP_005076.3| nuclear pore complex protein Nup214 [Homo sapiens]'	NaN	5	NaN	NaN	NaN	NaN	NaN	NaN	0	5	5
385	'>gi|342307069|ref|NP_001230122.1| BPI fold-containing family A member 1 precursor [Homo sapiens]'	NaN	NaN	NaN	5	NaN	NaN	NaN	NaN	0	5	5
386	'>gi|372622373|ref|NP_001243241.1| serine/threonine-protein kinase 3 isoform 2 [Homo sapiens]'	NaN	NaN	NaN	NaN	5	NaN	NaN	NaN	0	5	5
387	'>gi|392306969|ref|NP_001254711.1| activating molecule in BECN1-regulated autophagy protein 1 isoform 1 [Homo sapiens]'	NaN	NaN	5	NaN	NaN	NaN	NaN	NaN	0	5	5
388	'''>gi|41327781|ref|NP_951032.1| NADH dehydrogenase [ubiquinone] 1 alpha subcomplex assembly factor 3 isoform a precursor [Homo sap...'' <Preview truncated at 128 characters>'	NaN	NaN	NaN	NaN	NaN	NaN	5	NaN	0	5	5
389	'>gi|42734325|ref|NP_055860.1| wings apart-like protein homolog [Homo sapiens]'	NaN	NaN	5	NaN	NaN	NaN	NaN	NaN	0	5	5
390	'>gi|444299651|ref|NP_653091.3| protein CASC5 isoform 2 [Homo sapiens]'	NaN	NaN	5	NaN	NaN	NaN	NaN	NaN	0	5	5
391	'>gi|4502227|ref|NP_001168.1| ADP-ribosylation factor-like protein 1 isoform 1 [Homo sapiens]'	NaN	NaN	NaN	NaN	NaN	NaN	5	NaN	0	5	5
392	'>gi|4502491|ref|NP_001203.1| complement component 1 Q subcomponent-binding protein, mitochondrial precursor [Homo sapiens]'	NaN	NaN	NaN	NaN	NaN	5	NaN	NaN	0	5	5
393	'>gi|4503009|ref|NP_001864.1| carboxypeptidase E preproprotein [Homo sapiens]'	NaN	NaN	NaN	NaN	NaN	5	NaN	NaN	0	5	5
394	'>gi|4506091|ref|NP_002739.1| mitogen-activated protein kinase 6 [Homo sapiens]'	NaN	NaN	NaN	5	NaN	NaN	NaN	NaN	0	5	5
395	'>gi|4506605|ref|NP_000969.1| 60S ribosomal protein L23 [Homo sapiens]'	NaN	NaN	NaN	NaN	NaN	NaN	5	NaN	0	5	5
396	'>gi|50592988|ref|NP_003357.2| cytochrome b-c1 complex subunit 2, mitochondrial precursor [Homo sapiens]'	NaN	NaN	NaN	NaN	5	NaN	NaN	NaN	0	5	5
397	'>gi|52632379|ref|NP_001005332.1| melanoma-associated antigen D1 isoform b [Homo sapiens]'	NaN	NaN	NaN	5	NaN	NaN	NaN	NaN	0	5	5
398	'>gi|530389315|ref|XP_005251117.1| PREDICTED: 14-3-3 protein zeta/delta isoform X1 [Homo sapiens]'	NaN	NaN	NaN	NaN	NaN	5	NaN	NaN	0	5	5
399	'>gi|531990816|ref|NP_001269091.1| F-actin-capping protein subunit beta isoform 4 [Homo sapiens]'	NaN	NaN	NaN	NaN	NaN	5	NaN	NaN	0	5	5
400	'>gi|557440906|ref|NP_001273515.1| CDP-diacylglycerol--inositol 3-phosphatidyltransferase isoform 3 [Homo sapiens]'	NaN	NaN	NaN	NaN	NaN	5	NaN	NaN	0	5	5
401	'>gi|5729840|ref|NP_006650.1| gamma-tubulin complex component 2 isoform 2 [Homo sapiens]'	NaN	NaN	NaN	5	NaN	NaN	NaN	NaN	0	5	5
402	'>gi|57863271|ref|NP_055873.1| von Willebrand factor A domain-containing protein 8 isoform a precursor [Homo sapiens]'	NaN	NaN	5	NaN	NaN	NaN	NaN	NaN	0	5	5
403	'>gi|578833214|ref|XP_006722798.1| PREDICTED: dnaJ homolog subfamily B member 1 isoform X3 [Homo sapiens]'	NaN	NaN	NaN	NaN	NaN	5	NaN	NaN	0	5	5
404	'>gi|6005890|ref|NP_009039.1| transcription elongation factor B polypeptide 2 isoform a [Homo sapiens]'	NaN	NaN	NaN	NaN	NaN	NaN	5	NaN	0	5	5
405	'>gi|659667952|ref|NP_001281074.1| lupus La protein [Homo sapiens]'	NaN	NaN	NaN	NaN	5	NaN	NaN	NaN	0	5	5
406	'>gi|661567300|ref|NP_001281269.1| zinc finger CCCH domain-containing protein 18 isoform 1 [Homo sapiens]'	NaN	NaN	5	NaN	NaN	NaN	NaN	NaN	0	5	5
407	'>gi|66346679|ref|NP_001018077.1| plasminogen activator inhibitor 1 RNA-binding protein isoform 1 [Homo sapiens]'	NaN	NaN	NaN	NaN	5	NaN	NaN	NaN	0	5	5
408	'>gi|66932947|ref|NP_000005.2| alpha-2-macroglobulin precursor [Homo sapiens]'	NaN	NaN	5	NaN	NaN	NaN	NaN	NaN	0	5	5
409	'>gi|71483646|ref|NP_001025067.1| WD repeat domain phosphoinositide-interacting protein 4 isoform 2 [Homo sapiens]'	NaN	NaN	NaN	NaN	NaN	5	NaN	NaN	0	5	5
410	'>gi|73695475|ref|NP_060542.4| HEAT repeat-containing protein 1 [Homo sapiens]'	NaN	NaN	5	NaN	NaN	NaN	NaN	NaN	0	5	5
411	'>gi|91208418|ref|NP_001035095.1| transcription elongation regulator 1 isoform 2 [Homo sapiens]'	NaN	NaN	5	NaN	NaN	NaN	NaN	NaN	0	5	5
412	'>gi|4506773|ref|NP_002956.1| protein S100-A9 [Homo sapiens]'	1	4	3	4	1	4	4	NaN	0	4	21
413	'>gi|4885165|ref|NP_005204.1| cystatin-A [Homo sapiens]'	3	2	NaN	3	2	4	4	3	0	4	21
414	'>gi|320461711|ref|NP_001189360.1| peroxiredoxin-1 [Homo sapiens]'	2	NaN	1	NaN	2	2	4	3	0	4	14
415	'>gi|34419635|ref|NP_002146.2| heat shock 70 kDa protein 6 [Homo sapiens]'	1	1	1	4	4	1	2	NaN	0	4	14
416	'>RRV Gene 10'	NaN	4	NaN	1	NaN	1	2	4	0	4	12
417	'>gi|32189392|ref|NP_005800.3| peroxiredoxin-2 [Homo sapiens]'	NaN	NaN	4	3	NaN	3	2	NaN	0	4	12
418	'>gi|4557581|ref|NP_001435.1| fatty acid-binding protein, epidermal [Homo sapiens]'	NaN	NaN	4	NaN	NaN	2	3	1	0	4	10
419	'>gi|4504279|ref|NP_002098.1| histone H3.3 [Homo sapiens]'	NaN	NaN	NaN	2	NaN	3	4	NaN	0	4	9
420	'>gi|467094898|ref|NP_001264129.1| protein cornichon homolog 4 isoform 5 [Homo sapiens]'	NaN	NaN	NaN	NaN	NaN	2	4	3	0	4	9
421	'>gi|32189371|ref|NP_060945.2| transmembrane protein 165 precursor [Homo sapiens]'	NaN	NaN	NaN	NaN	4	4	NaN	NaN	0	4	8
422	'>gi|50592996|ref|NP_006077.2| tubulin beta-3 chain isoform 1 [Homo sapiens]'	1	NaN	NaN	1	4	2	NaN	NaN	0	4	8
423	'>gi|545478838|ref|NP_001269883.1| protein arginine N-methyltransferase 5 isoform d [Homo sapiens]'	1	2	NaN	1	NaN	NaN	NaN	4	0	4	8
424	'>gi|6005731|ref|NP_009167.1| calcineurin B homologous protein 1 [Homo sapiens]'	NaN	NaN	NaN	NaN	NaN	4	4	NaN	0	4	8
425	'>gi|150036268|ref|NP_004002.2| dystrophin Dp260-1 isoform [Homo sapiens]'	4	3	NaN	NaN	NaN	NaN	NaN	NaN	0	4	7
426	'>gi|156105681|ref|NP_036618.2| presenilin-2 isoform 2 [Homo sapiens]'	NaN	NaN	NaN	NaN	3	4	NaN	NaN	0	4	7
427	'>gi|217330616|ref|NP_001136099.1| protein transport protein Sec61 subunit alpha isoform 2 isoform c [Homo sapiens]'	NaN	NaN	NaN	NaN	4	3	NaN	NaN	0	4	7
428	'>gi|24308113|ref|NP_056449.1| KIF1-binding protein [Homo sapiens]'	NaN	NaN	NaN	3	4	NaN	NaN	NaN	0	4	7
429	'>gi|4502303|ref|NP_001688.1| ATP synthase subunit O, mitochondrial precursor [Homo sapiens]'	NaN	NaN	NaN	NaN	NaN	4	3	NaN	0	4	7
430	'>gi|5454122|ref|NP_006318.1| mitochondrial import inner membrane translocase subunit Tim23 [Homo sapiens]'	NaN	NaN	NaN	NaN	NaN	4	3	NaN	0	4	7
431	'>gi|58761544|ref|NP_001009999.1| lysine-specific histone demethylase 1A isoform a [Homo sapiens]'	NaN	NaN	3	4	NaN	NaN	NaN	NaN	0	4	7
432	'>gi|108773810|ref|NP_064502.9| leucine--tRNA ligase, cytoplasmic [Homo sapiens]'	NaN	NaN	4	NaN	NaN	NaN	2	NaN	0	4	6
433	'>gi|17158005|ref|NP_477521.1| mucin-like protein 1 precursor [Homo sapiens]'	1	NaN	NaN	NaN	NaN	4	NaN	1	0	4	6
434	'>gi|17388799|ref|NP_490647.1| dnaJ homolog subfamily B member 6 isoform a [Homo sapiens]'	NaN	NaN	NaN	NaN	2	4	NaN	NaN	0	4	6
435	'>gi|21389469|ref|NP_653237.1| mitochondrial intermembrane space import and assembly protein 40 isoform 2 [Homo sapiens]'	NaN	NaN	NaN	NaN	NaN	2	4	NaN	0	4	6
436	'>gi|24797086|ref|NP_002262.3| importin-5 [Homo sapiens]'	NaN	NaN	4	2	NaN	NaN	NaN	NaN	0	4	6
437	'>gi|307775422|ref|NP_001182732.1| low-density lipoprotein receptor isoform 6 precursor [Homo sapiens]'	NaN	NaN	4	2	NaN	NaN	NaN	NaN	0	4	6
438	'>gi|380837121|ref|NP_004883.3| vesicle-trafficking protein SEC22b precursor [Homo sapiens]'	NaN	NaN	NaN	NaN	NaN	4	2	NaN	0	4	6
439	'>gi|53759103|ref|NP_006381.2| importin-8 isoform 1 [Homo sapiens]'	NaN	NaN	2	4	NaN	NaN	NaN	NaN	0	4	6
440	'>gi|58331171|ref|NP_001009186.1| T-complex protein 1 subunit zeta isoform b [Homo sapiens]'	NaN	NaN	NaN	4	NaN	NaN	NaN	2	0	4	6
441	'>gi|115583685|ref|NP_003042.3| monocarboxylate transporter 1 [Homo sapiens]'	NaN	NaN	NaN	NaN	4	1	NaN	NaN	0	4	5
442	'>gi|190194386|ref|NP_064508.3| transmembrane 9 superfamily member 3 precursor [Homo sapiens]'	NaN	NaN	NaN	NaN	4	1	NaN	NaN	0	4	5
443	'>gi|222352151|ref|NP_006187.2| poly(rC)-binding protein 1 [Homo sapiens]'	NaN	NaN	NaN	NaN	4	1	NaN	NaN	0	4	5
444	'>gi|33239445|ref|NP_003742.2| eukaryotic translation initiation factor 3 subunit B [Homo sapiens]'	NaN	NaN	4	1	NaN	NaN	NaN	NaN	0	4	5
445	'>gi|44890068|ref|NP_005086.2| zinc finger MYM-type protein 4 [Homo sapiens]'	1	NaN	4	NaN	NaN	NaN	NaN	NaN	0	4	5
446	'>gi|528281421|ref|NP_001268463.1| band 4.1-like protein 3 isoform 3 [Homo sapiens]'	NaN	NaN	1	4	NaN	NaN	NaN	NaN	0	4	5
447	'>gi|567757591|ref|NP_001274680.1| squalene synthase isoform 4 [Homo sapiens]'	NaN	NaN	NaN	NaN	4	1	NaN	NaN	0	4	5
448	'>gi|82830426|ref|NP_006737.2| sex comb on midleg-like protein 1 isoform b [Homo sapiens]'	NaN	NaN	NaN	NaN	4	1	NaN	NaN	0	4	5
449	'>gi|10863945|ref|NP_066964.1| X-ray repair cross-complementing protein 5 [Homo sapiens]'	NaN	NaN	NaN	4	NaN	NaN	NaN	NaN	0	4	4
450	'>gi|112420977|ref|NP_036430.1| cullin-associated NEDD8-dissociated protein 2 isoform 2 [Homo sapiens]'	NaN	NaN	4	NaN	NaN	NaN	NaN	NaN	0	4	4
451	'>gi|11321607|ref|NP_004228.1| pachytene checkpoint protein 2 homolog isoform 1 [Homo sapiens]'	NaN	NaN	NaN	NaN	4	NaN	NaN	NaN	0	4	4
452	'>gi|117938759|ref|NP_536350.2| protein GNAS isoform XLas [Homo sapiens]'	NaN	NaN	NaN	NaN	4	NaN	NaN	NaN	0	4	4
453	'>gi|117938762|ref|NP_001070956.1| protein GNAS isoform f [Homo sapiens]'	NaN	NaN	NaN	NaN	NaN	4	NaN	NaN	0	4	4
454	'>gi|118200335|ref|NP_001071639.1| protein FAM127A [Homo sapiens]'	NaN	NaN	NaN	NaN	NaN	NaN	4	NaN	0	4	4
455	'>gi|11968182|ref|NP_072045.1| 40S ribosomal protein S18 [Homo sapiens]'	NaN	NaN	NaN	NaN	NaN	NaN	4	NaN	0	4	4
456	'>gi|126032350|ref|NP_001075109.1| DNA-dependent protein kinase catalytic subunit isoform 2 [Homo sapiens]'	NaN	NaN	NaN	4	NaN	NaN	NaN	NaN	0	4	4
457	'>gi|13236559|ref|NP_077295.1| multiple myeloma tumor-associated protein 2 [Homo sapiens]'	NaN	NaN	NaN	NaN	NaN	4	NaN	NaN	0	4	4
458	'>gi|147905592|ref|NP_001087198.1| coiled-coil domain-containing protein 102B [Homo sapiens]'	NaN	4	NaN	NaN	NaN	NaN	NaN	NaN	0	4	4
459	'>gi|148539842|ref|NP_015568.2| deleted in malignant brain tumors 1 protein isoform b precursor [Homo sapiens]'	NaN	NaN	NaN	4	NaN	NaN	NaN	NaN	0	4	4
460	'>gi|156766047|ref|NP_001096618.1| PERQ amino acid-rich with GYF domain-containing protein 2 isoform c [Homo sapiens]'	NaN	NaN	4	NaN	NaN	NaN	NaN	NaN	0	4	4
461	'>gi|157388904|ref|NP_060272.3| HEAT repeat-containing protein 2 [Homo sapiens]'	NaN	NaN	NaN	4	NaN	NaN	NaN	NaN	0	4	4
462	'>gi|157388937|ref|NP_060389.2| syntaxin-17 [Homo sapiens]'	NaN	NaN	NaN	NaN	NaN	4	NaN	NaN	0	4	4
463	'>gi|17158023|ref|NP_478070.1| protein FAM207A [Homo sapiens]'	NaN	NaN	NaN	NaN	NaN	4	NaN	NaN	0	4	4
464	'>gi|178557739|ref|NP_001002029.3| complement C4-B preproprotein [Homo sapiens]'	NaN	NaN	NaN	NaN	NaN	4	NaN	NaN	0	4	4
465	'>gi|188497750|ref|NP_277035.2| hexokinase-1 isoform HKI-td [Homo sapiens]'	NaN	NaN	NaN	4	NaN	NaN	NaN	NaN	0	4	4
466	'>gi|205360840|ref|NP_001128582.1| dnaJ homolog subfamily A member 3, mitochondrial isoform 2 [Homo sapiens]'	NaN	NaN	NaN	NaN	NaN	4	NaN	NaN	0	4	4
467	'>gi|21396489|ref|NP_004784.2| lon protease homolog, mitochondrial isoform 1 precursor [Homo sapiens]'	NaN	NaN	NaN	4	NaN	NaN	NaN	NaN	0	4	4
468	'>gi|224028246|ref|NP_001138881.1| non-POU domain-containing octamer-binding protein isoform 1 [Homo sapiens]'	NaN	NaN	NaN	NaN	4	NaN	NaN	NaN	0	4	4
469	'>gi|224493905|ref|NP_001139014.1| zinc finger and SCAN domain-containing protein 18 isoform 1 [Homo sapiens]'	NaN	NaN	NaN	4	NaN	NaN	NaN	NaN	0	4	4
470	'>gi|24430155|ref|NP_694546.1| 26S protease regulatory subunit 6B isoform 2 [Homo sapiens]'	NaN	NaN	NaN	NaN	4	NaN	NaN	NaN	0	4	4
471	'>gi|255003833|ref|NP_115518.3| centrosomal protein of 192 kDa [Homo sapiens]'	NaN	4	NaN	NaN	NaN	NaN	NaN	NaN	0	4	4
472	'>gi|25777612|ref|NP_002800.2| 26S proteasome non-ATPase regulatory subunit 3 [Homo sapiens]'	NaN	NaN	NaN	NaN	4	NaN	NaN	NaN	0	4	4
473	'>gi|266453278|ref|NP_001161093.1| ataxin-10 isoform 2 [Homo sapiens]'	NaN	NaN	NaN	NaN	4	NaN	NaN	NaN	0	4	4
474	'>gi|270265835|ref|NP_001161842.1| cullin-7 isoform 1 [Homo sapiens]'	NaN	NaN	4	NaN	NaN	NaN	NaN	NaN	0	4	4
475	'>gi|27777657|ref|NP_776249.1| serpin A12 precursor [Homo sapiens]'	NaN	4	NaN	NaN	NaN	NaN	NaN	NaN	0	4	4
476	'>gi|31543831|ref|NP_001061.2| tubulin gamma-1 chain [Homo sapiens]'	NaN	NaN	NaN	NaN	4	NaN	NaN	NaN	0	4	4
477	'>gi|324021745|ref|NP_001191236.1| vitamin D-binding protein isoform 3 precursor [Homo sapiens]'	NaN	NaN	4	NaN	NaN	NaN	NaN	NaN	0	4	4
478	'>gi|341865581|ref|NP_001230076.1| nuclear valosin-containing protein-like isoform 4 [Homo sapiens]'	NaN	NaN	NaN	4	NaN	NaN	NaN	NaN	0	4	4
479	'>gi|343478299|ref|NP_001230301.1| H(+)/Cl(-) exchange transporter 3 isoform a [Homo sapiens]'	NaN	NaN	NaN	4	NaN	NaN	NaN	NaN	0	4	4
480	'>gi|355477269|ref|NP_001239053.1| PAS domain-containing serine/threonine-protein kinase isoform 4 [Homo sapiens]'	NaN	NaN	NaN	NaN	4	NaN	NaN	NaN	0	4	4
481	'>gi|374081861|ref|NP_001243344.1| ras-related protein Rab-18 isoform 4 [Homo sapiens]'	NaN	NaN	NaN	NaN	NaN	4	NaN	NaN	0	4	4
482	'>gi|38372919|ref|NP_001719.2| basigin isoform 1 precursor [Homo sapiens]'	NaN	NaN	NaN	NaN	4	NaN	NaN	NaN	0	4	4
483	'>gi|389886539|ref|NP_001254507.1| torsin-1A-interacting protein 1 isoform 1 [Homo sapiens]'	NaN	NaN	NaN	NaN	4	NaN	NaN	NaN	0	4	4
484	'>gi|39753959|ref|NP_060104.2| BTB/POZ domain-containing protein KCTD9 [Homo sapiens]'	NaN	NaN	NaN	NaN	NaN	NaN	NaN	4	0	4	4
485	'>gi|408684407|ref|NP_060395.5| DENN domain-containing protein 4C [Homo sapiens]'	NaN	NaN	4	NaN	NaN	NaN	NaN	NaN	0	4	4
486	'>gi|41393547|ref|NP_056993.2| neuroblastoma-amplified sequence [Homo sapiens]'	NaN	NaN	NaN	NaN	NaN	4	NaN	NaN	0	4	4
487	'>gi|4502981|ref|NP_001852.1| cytochrome c oxidase subunit 4 isoform 1, mitochondrial precursor [Homo sapiens]'	NaN	NaN	NaN	NaN	NaN	NaN	4	NaN	0	4	4
488	'>gi|4503729|ref|NP_002005.1| peptidyl-prolyl cis-trans isomerase FKBP4 [Homo sapiens]'	NaN	NaN	NaN	NaN	4	NaN	NaN	NaN	0	4	4
489	'>gi|4506613|ref|NP_000974.1| 60S ribosomal protein L22 proprotein [Homo sapiens]'	NaN	NaN	NaN	NaN	NaN	NaN	4	NaN	0	4	4
490	'>gi|45387955|ref|NP_991330.1| protein QIL1 precursor [Homo sapiens]'	NaN	NaN	NaN	NaN	NaN	NaN	4	NaN	0	4	4
491	'>gi|46276893|ref|NP_996896.1| transcription elongation factor B polypeptide 2 isoform b [Homo sapiens]'	NaN	NaN	NaN	NaN	NaN	4	NaN	NaN	0	4	4
492	'>gi|46367787|ref|NP_002559.2| polyadenylate-binding protein 1 [Homo sapiens]'	NaN	NaN	NaN	NaN	4	NaN	NaN	NaN	0	4	4
493	'>gi|4758788|ref|NP_004542.1| NADH dehydrogenase [ubiquinone] iron-sulfur protein 3, mitochondrial precursor [Homo sapiens]'	NaN	NaN	NaN	NaN	NaN	4	NaN	NaN	0	4	4
494	'>gi|48255945|ref|NP_001673.2| plasma membrane calcium-transporting ATPase 1 isoform 1b [Homo sapiens]'	NaN	NaN	4	NaN	NaN	NaN	NaN	NaN	0	4	4
495	'>gi|4826686|ref|NP_004930.1| ATP-dependent RNA helicase DDX1 [Homo sapiens]'	NaN	NaN	NaN	4	NaN	NaN	NaN	NaN	0	4	4
496	'>gi|4826998|ref|NP_005057.1| splicing factor, proline- and glutamine-rich [Homo sapiens]'	NaN	NaN	NaN	4	NaN	NaN	NaN	NaN	0	4	4
497	'>gi|50659095|ref|NP_004719.2| nucleolar RNA helicase 2 isoform 1 [Homo sapiens]'	NaN	NaN	NaN	4	NaN	NaN	NaN	NaN	0	4	4
498	'>gi|51093832|ref|NP_056450.2| GTPase-activating protein and VPS9 domain-containing protein 1 isoform 4 [Homo sapiens]'	NaN	NaN	4	NaN	NaN	NaN	NaN	NaN	0	4	4
499	'>gi|530377873|ref|XP_005263140.1| PREDICTED: probable E3 ubiquitin-protein ligase HERC6 isoform X1 [Homo sapiens]'	NaN	NaN	NaN	4	NaN	NaN	NaN	NaN	0	4	4
500	'>gi|530414709|ref|XP_005259899.1| PREDICTED: peptidyl-prolyl cis-trans isomerase FKBP8 isoform X2 [Homo sapiens]'	NaN	NaN	NaN	NaN	4	NaN	NaN	NaN	0	4	4
501	'>gi|5453549|ref|NP_006397.1| peroxiredoxin-4 precursor [Homo sapiens]'	NaN	NaN	NaN	NaN	NaN	4	NaN	NaN	0	4	4
502	'>gi|5453597|ref|NP_006126.1| F-actin-capping protein subunit alpha-1 [Homo sapiens]'	NaN	NaN	NaN	NaN	NaN	4	NaN	NaN	0	4	4
503	'>gi|548960892|ref|NP_001271455.1| aurora kinase B isoform 3 [Homo sapiens]'	NaN	NaN	NaN	NaN	NaN	4	NaN	NaN	0	4	4
504	'>gi|557129022|ref|NP_001273387.1| ubiquitin carboxyl-terminal hydrolase 7 isoform 3 [Homo sapiens]'	NaN	NaN	4	NaN	NaN	NaN	NaN	NaN	0	4	4
505	'>gi|570700827|ref|NP_001275682.1| structural maintenance of chromosomes protein 4 isoform 2 [Homo sapiens]'	NaN	NaN	4	NaN	NaN	NaN	NaN	NaN	0	4	4
506	'>gi|589269130|ref|NP_001277113.1| nicastrin isoform 2 [Homo sapiens]'	NaN	NaN	4	NaN	NaN	NaN	NaN	NaN	0	4	4
507	'>gi|5901922|ref|NP_008996.1| hsp90 co-chaperone Cdc37 [Homo sapiens]'	NaN	NaN	NaN	NaN	4	NaN	NaN	NaN	0	4	4
508	'>gi|5902122|ref|NP_008877.1| spectrin beta chain, non-erythrocytic 2 [Homo sapiens]'	NaN	NaN	4	NaN	NaN	NaN	NaN	NaN	0	4	4
509	'>gi|60218913|ref|NP_001007215.1| calcyclin-binding protein isoform 2 [Homo sapiens]'	NaN	NaN	NaN	NaN	NaN	4	NaN	NaN	0	4	4
510	'>gi|618857509|ref|NP_006001.4| mesencephalic astrocyte-derived neurotrophic factor precursor [Homo sapiens]'	4	NaN	NaN	NaN	NaN	NaN	NaN	NaN	0	4	4
511	'>gi|62955803|ref|NP_056169.1| nucleoporin NUP188 homolog [Homo sapiens]'	NaN	NaN	4	NaN	NaN	NaN	NaN	NaN	0	4	4
512	'>gi|663856631|ref|NP_001287718.1| peroxisomal biogenesis factor 5 isoform e [Homo sapiens]'	NaN	NaN	NaN	4	NaN	NaN	NaN	NaN	0	4	4
513	'>gi|71772415|ref|NP_001025180.1| 40S ribosomal protein S15a [Homo sapiens]'	NaN	NaN	NaN	NaN	NaN	NaN	4	NaN	0	4	4
514	'>gi|73466520|ref|NP_001026976.1| fatty aldehyde dehydrogenase isoform 1 [Homo sapiens]'	NaN	NaN	NaN	NaN	4	NaN	NaN	NaN	0	4	4
515	'>gi|7705558|ref|NP_057452.1| inositol-3-phosphate synthase 1 isoform 1 [Homo sapiens]'	NaN	NaN	NaN	NaN	4	NaN	NaN	NaN	0	4	4
516	'>gi|7705855|ref|NP_057226.1| estradiol 17-beta-dehydrogenase 12 [Homo sapiens]'	NaN	NaN	NaN	NaN	NaN	4	NaN	NaN	0	4	4
517	'>gi|8922701|ref|NP_060708.1| acylglycerol kinase, mitochondrial precursor [Homo sapiens]'	NaN	NaN	NaN	NaN	4	NaN	NaN	NaN	0	4	4
518	'>gi|8923930|ref|NP_060934.1| CDGSH iron-sulfur domain-containing protein 1 [Homo sapiens]'	NaN	NaN	NaN	NaN	NaN	NaN	4	NaN	0	4	4
519	'>gi|13129110|ref|NP_077007.1| methylosome protein 50 [Homo sapiens]'	2	2	NaN	1	2	3	1	3	0	3	14
520	'>gi|4506145|ref|NP_002760.1| trypsin-1 preproprotein [Homo sapiens]'	2	NaN	NaN	1	1	3	3	2	0	3	12
521	'>gi|567316172|ref|NP_001274528.1| THAP domain-containing protein 5 isoform 3 [Homo sapiens]'	2	NaN	2	2	3	1	2	NaN	0	3	12
522	'>gi|150456463|ref|NP_835465.2| gasdermin-A [Homo sapiens]'	1	1	2	3	NaN	3	NaN	1	0	3	11
523	'>gi|170296790|ref|NP_031369.2| trypsin-3 isoform 1 preproprotein [Homo sapiens]'	3	2	NaN	1	1	2	1	1	0	3	11
524	'>gi|4557367|ref|NP_000377.1| bleomycin hydrolase [Homo sapiens]'	2	2	3	NaN	NaN	2	1	1	0	3	11
525	'>gi|30089940|ref|NP_005886.2| Golgin subfamily A member 3 isoform 1 [Homo sapiens]'	2	3	NaN	NaN	NaN	3	2	NaN	0	3	10
526	'>gi|221316614|ref|NP_004416.2| extracellular matrix protein 1 isoform 1 precursor [Homo sapiens]'	2	NaN	3	2	NaN	1	NaN	NaN	0	3	8
527	'''>gi|26006851|ref|NP_003710.1| high affinity cAMP-specific and IBMX-insensitive 3'',5''-cyclic phosphodiesterase 8B isoform 1 [Homo...'' <Preview truncated at 128 characters>'	1	NaN	2	1	NaN	3	1	NaN	0	3	8
528	'>gi|4507475|ref|NP_000350.1| protein-glutamine gamma-glutamyltransferase K [Homo sapiens]'	NaN	NaN	3	3	NaN	2	NaN	NaN	0	3	8
529	'>gi|193794853|ref|NP_079197.3| protein POF1B [Homo sapiens]'	3	1	1	NaN	NaN	2	NaN	NaN	0	3	7
530	'>gi|4503571|ref|NP_001419.1| alpha-enolase isoform 1 [Homo sapiens]'	NaN	2	NaN	3	NaN	2	NaN	NaN	0	3	7
531	'>gi|4504985|ref|NP_002298.1| galectin-7 [Homo sapiens]'	1	NaN	1	NaN	NaN	2	3	NaN	0	3	7
532	'>gi|13129018|ref|NP_076956.1| gamma-glutamylcyclotransferase isoform 1 [Homo sapiens]'	3	1	1	1	NaN	NaN	NaN	NaN	0	3	6
533	'>gi|21489959|ref|NP_653247.1| immunoglobulin J chain precursor [Homo sapiens]'	1	NaN	NaN	3	NaN	1	1	NaN	0	3	6
534	'>gi|34335134|ref|NP_899195.1| protein SEC13 homolog isoform 1 [Homo sapiens]'	NaN	NaN	NaN	NaN	3	3	NaN	NaN	0	3	6
535	'>gi|557948045|ref|NP_079084.3| protein aurora borealis isoform 1 [Homo sapiens]'	NaN	NaN	NaN	3	3	NaN	NaN	NaN	0	3	6
536	'>gi|5902072|ref|NP_008850.1| serpin B3 [Homo sapiens]'	NaN	NaN	NaN	NaN	1	3	2	NaN	0	3	6
537	'>gi|217272892|ref|NP_004238.3| 116 kDa U5 small nuclear ribonucleoprotein component isoform a [Homo sapiens]'	NaN	NaN	2	3	NaN	NaN	NaN	NaN	0	3	5
538	'>gi|262118216|ref|NP_115627.6| coiled-coil domain-containing protein 88B precursor [Homo sapiens]'	NaN	NaN	3	NaN	NaN	2	NaN	NaN	0	3	5
539	'>gi|34740329|ref|NP_919223.1| heterogeneous nuclear ribonucleoprotein A3 [Homo sapiens]'	NaN	NaN	NaN	NaN	2	3	NaN	NaN	0	3	5
540	'>gi|4506697|ref|NP_001014.1| 40S ribosomal protein S20 isoform 2 [Homo sapiens]'	NaN	NaN	NaN	NaN	NaN	2	3	NaN	0	3	5
541	'>gi|530384253|ref|XP_005267294.1| PREDICTED: bcl-2-associated transcription factor 1 isoform X2 [Homo sapiens]'	NaN	NaN	3	2	NaN	NaN	NaN	NaN	0	3	5
542	'>gi|61743954|ref|NP_001611.1| neuroblast differentiation-associated protein AHNAK isoform 1 [Homo sapiens]'	3	NaN	NaN	NaN	NaN	2	NaN	NaN	0	3	5
543	'>gi|83641876|ref|NP_061902.2| probable serine carboxypeptidase CPVL precursor [Homo sapiens]'	NaN	NaN	NaN	NaN	2	3	NaN	NaN	0	3	5
544	'>gi|9910278|ref|NP_064584.1| keratinocyte-associated transmembrane protein 2 precursor [Homo sapiens]'	NaN	NaN	NaN	3	2	NaN	NaN	NaN	0	3	5
545	'>gi|116642885|ref|NP_001070867.1| probable hydrolase PNKD isoform 3 precursor [Homo sapiens]'	NaN	NaN	NaN	NaN	NaN	1	3	NaN	0	3	4
546	'>gi|118601081|ref|NP_001073027.1| heterogeneous nuclear ribonucleoprotein U-like protein 2 [Homo sapiens]'	NaN	NaN	1	3	NaN	NaN	NaN	NaN	0	3	4
547	'>gi|119964721|ref|NP_005237.2| tyrosine-protein kinase Fer [Homo sapiens]'	1	NaN	3	NaN	NaN	NaN	NaN	NaN	0	3	4
548	'>gi|157502195|ref|NP_787128.2| 26S proteasome non-ATPase regulatory subunit 13 isoform 2 [Homo sapiens]'	NaN	NaN	NaN	NaN	1	3	NaN	NaN	0	3	4
549	'>gi|21389315|ref|NP_005975.1| tricarboxylate transport protein, mitochondrial isoform a precursor [Homo sapiens]'	NaN	NaN	NaN	NaN	NaN	3	1	NaN	0	3	4
550	'>gi|215490096|ref|NP_001135920.1| protein spinster homolog 1 isoform 1 [Homo sapiens]'	NaN	NaN	NaN	1	3	NaN	NaN	NaN	0	3	4
551	'>gi|228008396|ref|NP_001153145.1| heterogeneous nuclear ribonucleoprotein Q isoform 2 [Homo sapiens]'	NaN	NaN	NaN	1	3	NaN	NaN	NaN	0	3	4
552	'>gi|296317339|ref|NP_001171752.1| voltage-dependent anion-selective channel protein 2 isoform 2 [Homo sapiens]'	NaN	NaN	NaN	NaN	NaN	3	1	NaN	0	3	4
553	'>gi|300796991|ref|NP_001177990.1| mitochondrial glutamate carrier 1 [Homo sapiens]'	NaN	NaN	NaN	NaN	1	3	NaN	NaN	0	3	4
554	'>gi|372466586|ref|NP_001243225.1| immunoglobulin lambda-like polypeptide 5 isoform 2 [Homo sapiens]'	NaN	NaN	NaN	3	NaN	1	NaN	NaN	0	3	4
555	'>gi|38372925|ref|NP_940991.1| basigin isoform 2 [Homo sapiens]'	NaN	NaN	NaN	3	NaN	1	NaN	NaN	0	3	4
556	'>gi|4503313|ref|NP_003638.1| diacylglycerol kinase epsilon [Homo sapiens]'	NaN	NaN	NaN	1	3	NaN	NaN	NaN	0	3	4
557	'>gi|4506691|ref|NP_001011.1| 40S ribosomal protein S16 [Homo sapiens]'	NaN	NaN	NaN	NaN	NaN	1	3	NaN	0	3	4
558	'>gi|4507729|ref|NP_001060.1| tubulin beta-2A chain [Homo sapiens]'	NaN	NaN	NaN	NaN	3	NaN	1	NaN	0	3	4
559	'>gi|5032181|ref|NP_005825.1| mitochondrial import inner membrane translocase subunit Tim17-B isoform 2 [Homo sapiens]'	NaN	NaN	NaN	NaN	NaN	3	1	NaN	0	3	4
560	'>gi|530411133|ref|XP_005258084.1| PREDICTED: transcription elongation factor SPT6 isoform X2 [Homo sapiens]'	NaN	3	1	NaN	NaN	NaN	NaN	NaN	0	3	4
561	'>gi|5453998|ref|NP_006382.1| importin-7 [Homo sapiens]'	NaN	NaN	3	1	NaN	NaN	NaN	NaN	0	3	4
562	'>gi|5729953|ref|NP_006591.1| nuclear migration protein nudC [Homo sapiens]'	NaN	NaN	NaN	NaN	3	1	NaN	NaN	0	3	4
563	'>gi|6678271|ref|NP_031401.1| TAR DNA-binding protein 43 [Homo sapiens]'	NaN	NaN	NaN	NaN	3	1	NaN	NaN	0	3	4
564	'>gi|6912430|ref|NP_036537.1| protein-S-isoprenylcysteine O-methyltransferase [Homo sapiens]'	NaN	NaN	NaN	NaN	NaN	1	3	NaN	0	3	4
565	'>gi|84697022|ref|NP_705873.2| homeobox protein Hox-A1 isoform b [Homo sapiens]'	NaN	NaN	NaN	NaN	1	NaN	3	NaN	0	3	4
566	'>gi|10190682|ref|NP_065700.1| chromobox protein homolog 8 [Homo sapiens]'	NaN	3	NaN	NaN	NaN	NaN	NaN	NaN	0	3	3
567	'>gi|109255234|ref|NP_079390.3| centrosomal protein of 290 kDa [Homo sapiens]'	NaN	NaN	NaN	NaN	3	NaN	NaN	NaN	0	3	3
568	'>gi|109637791|ref|NP_060899.2| transcription factor TFIIIB component B'''' homolog [Homo sapiens]'	NaN	NaN	NaN	NaN	NaN	3	NaN	NaN	0	3	3
569	'>gi|109715835|ref|NP_071353.4| HEAT repeat-containing protein 6 [Homo sapiens]'	NaN	NaN	3	NaN	NaN	NaN	NaN	NaN	0	3	3
570	'>gi|110347425|ref|NP_001036016.1| structural maintenance of chromosomes protein 2 [Homo sapiens]'	NaN	NaN	3	NaN	NaN	NaN	NaN	NaN	0	3	3
571	'>gi|11141903|ref|NP_068598.1| FAST kinase domain-containing protein 5 [Homo sapiens]'	NaN	NaN	NaN	NaN	3	NaN	NaN	NaN	0	3	3
572	'>gi|11321583|ref|NP_003841.1| succinyl-CoA ligase [ADP-forming] subunit beta, mitochondrial precursor [Homo sapiens]'	NaN	NaN	NaN	NaN	3	NaN	NaN	NaN	0	3	3
573	'>gi|11464969|ref|NP_009188.1| paraneoplastic antigen Ma2 [Homo sapiens]'	NaN	NaN	NaN	NaN	3	NaN	NaN	NaN	0	3	3
574	'>gi|115298678|ref|NP_000055.2| complement C3 precursor [Homo sapiens]'	NaN	NaN	NaN	3	NaN	NaN	NaN	NaN	0	3	3
575	'>gi|116089331|ref|NP_078779.2| transcription factor HIVEP3 isoform a [Homo sapiens]'	NaN	NaN	NaN	NaN	3	NaN	NaN	NaN	0	3	3
576	'>gi|116235474|ref|NP_443134.2| serine/threonine-protein kinase 11-interacting protein [Homo sapiens]'	NaN	NaN	3	NaN	NaN	NaN	NaN	NaN	0	3	3
577	'>gi|116256487|ref|NP_006693.3| neuropathy target esterase isoform b [Homo sapiens]'	NaN	NaN	3	NaN	NaN	NaN	NaN	NaN	0	3	3
578	'>gi|11641421|ref|NP_067090.1| ceramide synthase 1 isoform 1 [Homo sapiens]'	NaN	NaN	NaN	NaN	NaN	3	NaN	NaN	0	3	3
579	'>gi|124244056|ref|NP_689637.3| APC membrane recruitment protein 1 [Homo sapiens]'	NaN	NaN	3	NaN	NaN	NaN	NaN	NaN	0	3	3
580	'>gi|13027640|ref|NP_005754.2| alpha-aminoadipic semialdehyde synthase, mitochondrial [Homo sapiens]'	NaN	NaN	NaN	NaN	3	NaN	NaN	NaN	0	3	3
581	'>gi|13124773|ref|NP_057542.2| protein FAM203A [Homo sapiens]'	NaN	NaN	NaN	NaN	3	NaN	NaN	NaN	0	3	3
582	'>gi|13375618|ref|NP_055577.1| delta(24)-sterol reductase precursor [Homo sapiens]'	NaN	NaN	NaN	NaN	3	NaN	NaN	NaN	0	3	3
583	'>gi|134142337|ref|NP_004987.2| multidrug resistance-associated protein 1 [Homo sapiens]'	NaN	NaN	3	NaN	NaN	NaN	NaN	NaN	0	3	3
584	'>gi|134244281|ref|NP_005920.2| melanotransferrin isoform 1 precursor [Homo sapiens]'	NaN	NaN	NaN	NaN	NaN	3	NaN	NaN	0	3	3
585	'>gi|14277700|ref|NP_001007.2| 40S ribosomal protein S12 [Homo sapiens]'	NaN	NaN	NaN	NaN	NaN	NaN	3	NaN	0	3	3
586	'>gi|145312246|ref|NP_001077433.1| tudor and KH domain-containing protein isoform b [Homo sapiens]'	NaN	NaN	NaN	NaN	3	NaN	NaN	NaN	0	3	3
587	'>gi|14591909|ref|NP_000960.2| 60S ribosomal protein L5 [Homo sapiens]'	NaN	NaN	NaN	NaN	NaN	3	NaN	NaN	0	3	3
588	'>gi|145977196|ref|NP_001078841.1| UPF0723 protein C11orf83 precursor [Homo sapiens]'	NaN	NaN	NaN	NaN	NaN	NaN	3	NaN	0	3	3
589	'>gi|14790190|ref|NP_055816.2| msx2-interacting protein [Homo sapiens]'	NaN	3	NaN	NaN	NaN	NaN	NaN	NaN	0	3	3
590	'>gi|148839466|ref|NP_001019831.2| kalirin isoform 1 [Homo sapiens]'	NaN	NaN	NaN	NaN	3	NaN	NaN	NaN	0	3	3
591	'>gi|15011880|ref|NP_057626.2| serine/threonine-protein kinase MST4 isoform 1 [Homo sapiens]'	NaN	NaN	NaN	NaN	3	NaN	NaN	NaN	0	3	3
592	'>gi|153792590|ref|NP_001017963.2| heat shock protein HSP 90-alpha isoform 1 [Homo sapiens]'	NaN	3	NaN	NaN	NaN	NaN	NaN	NaN	0	3	3
593	'>gi|157671927|ref|NP_660208.2| spermatogenesis-associated protein 5 [Homo sapiens]'	NaN	NaN	NaN	3	NaN	NaN	NaN	NaN	0	3	3
594	'>gi|162809336|ref|NP_001010883.2| protein FAM102B [Homo sapiens]'	NaN	NaN	NaN	3	NaN	NaN	NaN	NaN	0	3	3
595	'>gi|166795297|ref|NP_057225.2| cytoplasmic dynein 1 light intermediate chain 1 [Homo sapiens]'	NaN	NaN	NaN	NaN	3	NaN	NaN	NaN	0	3	3
596	'>gi|17105394|ref|NP_000975.2| 60S ribosomal protein L23a [Homo sapiens]'	NaN	NaN	NaN	NaN	NaN	NaN	3	NaN	0	3	3
597	'>gi|171906582|ref|NP_064583.2| coiled-coil domain-containing protein 47 precursor [Homo sapiens]'	NaN	NaN	NaN	NaN	3	NaN	NaN	NaN	0	3	3
598	'>gi|17921987|ref|NP_004367.2| cytochrome c oxidase assembly protein COX15 homolog isoform 2 [Homo sapiens]'	NaN	NaN	NaN	NaN	NaN	3	NaN	NaN	0	3	3
599	'>gi|189458819|ref|NP_001121620.1| transferrin receptor protein 1 [Homo sapiens]'	NaN	NaN	NaN	3	NaN	NaN	NaN	NaN	0	3	3
600	'>gi|194578921|ref|NP_001123999.1| C-Jun-amino-terminal kinase-interacting protein 4 isoform 2 [Homo sapiens]'	NaN	NaN	3	NaN	NaN	NaN	NaN	NaN	0	3	3
601	'>gi|19526767|ref|NP_598407.1| mitogen-activated protein kinase kinase kinase MLT isoform 2 [Homo sapiens]'	NaN	NaN	NaN	NaN	3	NaN	NaN	NaN	0	3	3
602	'>gi|197382758|ref|NP_001127964.1| heparan sulfate 2-O-sulfotransferase 1 isoform 2 [Homo sapiens]'	NaN	NaN	NaN	NaN	3	NaN	NaN	NaN	0	3	3
603	'>gi|20070125|ref|NP_000909.2| protein disulfide-isomerase precursor [Homo sapiens]'	NaN	NaN	NaN	NaN	3	NaN	NaN	NaN	0	3	3
604	'>gi|20127408|ref|NP_000173.2| trifunctional enzyme subunit alpha, mitochondrial precursor [Homo sapiens]'	NaN	NaN	NaN	3	NaN	NaN	NaN	NaN	0	3	3
605	'>gi|203098098|ref|NP_065910.3| protein Shroom3 [Homo sapiens]'	NaN	NaN	NaN	NaN	NaN	3	NaN	NaN	0	3	3
606	'>gi|21071032|ref|NP_057306.2| probable ATP-dependent RNA helicase DDX41 [Homo sapiens]'	NaN	NaN	NaN	NaN	3	NaN	NaN	NaN	0	3	3
607	'>gi|21361368|ref|NP_002851.2| delta-1-pyrroline-5-carboxylate synthase isoform 1 [Homo sapiens]'	NaN	NaN	NaN	3	NaN	NaN	NaN	NaN	0	3	3
608	'>gi|214010212|ref|NP_001135753.1| coatomer subunit delta isoform 2 [Homo sapiens]'	NaN	NaN	NaN	NaN	3	NaN	NaN	NaN	0	3	3
609	'>gi|21704277|ref|NP_002217.3| protein jagged-2 isoform a precursor [Homo sapiens]'	NaN	NaN	3	NaN	NaN	NaN	NaN	NaN	0	3	3
610	'>gi|223941779|ref|NP_001138828.1| COBW domain-containing protein 1 isoform 3 [Homo sapiens]'	NaN	NaN	NaN	NaN	3	NaN	NaN	NaN	0	3	3
611	'>gi|226371704|ref|NP_076415.3| zinc finger and SCAN domain-containing protein 18 isoform 3 [Homo sapiens]'	NaN	NaN	NaN	NaN	3	NaN	NaN	NaN	0	3	3
612	'>gi|237649049|ref|NP_808210.2| small nuclear ribonucleoprotein Sm D2 isoform 2 [Homo sapiens]'	NaN	NaN	NaN	NaN	NaN	NaN	3	NaN	0	3	3
613	'>gi|24307961|ref|NP_055472.1| TELO2-interacting protein 1 homolog [Homo sapiens]'	NaN	NaN	NaN	3	NaN	NaN	NaN	NaN	0	3	3
614	'>gi|24638433|ref|NP_056146.1| nicastrin isoform 1 precursor [Homo sapiens]'	NaN	NaN	NaN	3	NaN	NaN	NaN	NaN	0	3	3
615	'>gi|254587994|ref|NP_001157019.1| synergin gamma isoform 7 [Homo sapiens]'	NaN	NaN	3	NaN	NaN	NaN	NaN	NaN	0	3	3
616	'>gi|26080431|ref|NP_079133.3| ATPase family AAA domain-containing protein 5 [Homo sapiens]'	NaN	NaN	NaN	NaN	NaN	NaN	NaN	3	0	3	3
617	'>gi|291621664|ref|NP_001167589.1| RNA-binding protein MEX3D isoform 2 [Homo sapiens]'	NaN	NaN	NaN	3	NaN	NaN	NaN	NaN	0	3	3
618	'>gi|301069416|ref|NP_001180286.1| nuclear pore glycoprotein p62 [Homo sapiens]'	NaN	NaN	NaN	NaN	3	NaN	NaN	NaN	0	3	3
619	'>gi|311771641|ref|NP_001185708.1| cullin-2 isoform b [Homo sapiens]'	NaN	NaN	NaN	3	NaN	NaN	NaN	NaN	0	3	3
620	'>gi|312596881|ref|NP_001186092.1| 26S protease regulatory subunit 8 isoform 2 [Homo sapiens]'	NaN	NaN	NaN	NaN	3	NaN	NaN	NaN	0	3	3
621	'>gi|31652236|ref|NP_001904.2| protein CASP isoform b [Homo sapiens]'	NaN	NaN	NaN	3	NaN	NaN	NaN	NaN	0	3	3
622	'>gi|32967601|ref|NP_066267.2| ankyrin-3 isoform 1 [Homo sapiens]'	NaN	NaN	3	NaN	NaN	NaN	NaN	NaN	0	3	3
623	'>gi|330688408|ref|NP_892006.3| nesprin-1 isoform 1 [Homo sapiens]'	NaN	NaN	NaN	NaN	NaN	3	NaN	NaN	0	3	3
624	'>gi|334358866|ref|NP_001229291.1| melanoma-associated antigen D4 isoform 3 [Homo sapiens]'	NaN	NaN	NaN	3	NaN	NaN	NaN	NaN	0	3	3
625	'>gi|34147522|ref|NP_064632.2| chaperone activity of bc1 complex-like, mitochondrial [Homo sapiens]'	NaN	NaN	NaN	NaN	3	NaN	NaN	NaN	0	3	3
626	'>gi|34577075|ref|NP_005460.2| acyl-coenzyme A thioesterase 8 [Homo sapiens]'	NaN	NaN	NaN	NaN	NaN	3	NaN	NaN	0	3	3
627	'>gi|354548850|ref|NP_001238910.1| calcipressin-3 isoform 3 [Homo sapiens]'	NaN	NaN	NaN	NaN	NaN	NaN	3	NaN	0	3	3
628	'>gi|378744165|ref|NP_001243755.1| RNA polymerase II-associated factor 1 homolog isoform 2 [Homo sapiens]'	NaN	NaN	NaN	3	NaN	NaN	NaN	NaN	0	3	3
629	'>gi|384475528|ref|NP_001244958.1| gelsolin isoform d [Homo sapiens]'	NaN	NaN	NaN	NaN	NaN	3	NaN	NaN	0	3	3
630	'>gi|38570099|ref|NP_942581.1| glutamine-rich protein 1 [Homo sapiens]'	NaN	NaN	NaN	3	NaN	NaN	NaN	NaN	0	3	3
631	'>gi|395394053|ref|NP_001257449.1| disheveled-associated activator of morphogenesis 1 isoform 2 [Homo sapiens]'	NaN	NaN	3	NaN	NaN	NaN	NaN	NaN	0	3	3
632	'>gi|39930541|ref|NP_899064.1| uncharacterized protein C9orf142 [Homo sapiens]'	NaN	NaN	NaN	NaN	NaN	3	NaN	NaN	0	3	3
633	'>gi|40068049|ref|NP_060093.3| metal transporter CNNM3 isoform 1 precursor [Homo sapiens]'	NaN	NaN	NaN	3	NaN	NaN	NaN	NaN	0	3	3
634	'>gi|4502709|ref|NP_001777.1| cyclin-dependent kinase 1 isoform 1 [Homo sapiens]'	NaN	NaN	NaN	NaN	NaN	3	NaN	NaN	0	3	3
635	'''>gi|4503523|ref|NP_003744.1| eukaryotic translation initiation factor 3 subunit D {ECO:0000255|HAMAP-Rule:MF_03003} [Homo sapien...'' <Preview truncated at 128 characters>'	NaN	NaN	NaN	NaN	3	NaN	NaN	NaN	0	3	3
636	'>gi|4504327|ref|NP_000174.1| trifunctional enzyme subunit beta, mitochondrial isoform 1 precursor [Homo sapiens]'	NaN	NaN	NaN	NaN	3	NaN	NaN	NaN	0	3	3
637	'>gi|4504517|ref|NP_001531.1| heat shock protein beta-1 [Homo sapiens]'	NaN	NaN	NaN	NaN	NaN	3	NaN	NaN	0	3	3
638	'>gi|4506623|ref|NP_000979.1| 60S ribosomal protein L27 [Homo sapiens]'	NaN	NaN	NaN	NaN	NaN	NaN	3	NaN	0	3	3
639	'>gi|4507239|ref|NP_003136.1| translocon-associated protein subunit beta precursor [Homo sapiens]'	NaN	NaN	NaN	NaN	NaN	3	NaN	NaN	0	3	3
640	'>gi|4507677|ref|NP_003290.1| endoplasmin precursor [Homo sapiens]'	NaN	NaN	NaN	3	NaN	NaN	NaN	NaN	0	3	3
641	'>gi|45597177|ref|NP_055858.2| TBC1 domain family member 9B isoform b [Homo sapiens]'	NaN	NaN	3	NaN	NaN	NaN	NaN	NaN	0	3	3
642	'>gi|46370082|ref|NP_996920.1| transcription factor 12 isoform a [Homo sapiens]'	NaN	NaN	NaN	3	NaN	NaN	NaN	NaN	0	3	3
643	'>gi|4759226|ref|NP_004603.1| TGF-beta receptor type-1 isoform 1 precursor [Homo sapiens]'	NaN	NaN	NaN	NaN	3	NaN	NaN	NaN	0	3	3
644	'>gi|4826762|ref|NP_005134.1| haptoglobin isoform 1 preproprotein [Homo sapiens]'	NaN	NaN	NaN	3	NaN	NaN	NaN	NaN	0	3	3
645	'>gi|5032315|ref|NP_004001.1| dystrophin Dp427p2 isoform [Homo sapiens]'	NaN	NaN	NaN	NaN	3	NaN	NaN	NaN	0	3	3
646	'>gi|50659080|ref|NP_001076.2| alpha-1-antichymotrypsin precursor [Homo sapiens]'	NaN	NaN	NaN	3	NaN	NaN	NaN	NaN	0	3	3
647	'>gi|526118147|ref|NP_001267717.1| surfeit locus protein 4 isoform 2 [Homo sapiens]'	NaN	NaN	NaN	NaN	NaN	NaN	3	NaN	0	3	3
648	'>gi|530370916|ref|XP_005246889.1| PREDICTED: tubulin alpha-4A chain isoform X1 [Homo sapiens]'	NaN	NaN	NaN	NaN	NaN	3	NaN	NaN	0	3	3
649	'''>gi|530379548|ref|XP_005248681.1| PREDICTED: high affinity cAMP-specific and IBMX-insensitive 3'',5''-cyclic phosphodiesterase 8B ...'' <Preview truncated at 128 characters>'	NaN	3	NaN	NaN	NaN	NaN	NaN	NaN	0	3	3
650	'>gi|530406197|ref|XP_005254606.1| PREDICTED: beta-2-microglobulin isoform X1 [Homo sapiens]'	NaN	NaN	NaN	NaN	NaN	3	NaN	NaN	0	3	3
651	'>gi|53729346|ref|NP_000290.2| plakophilin-1 isoform 1b [Homo sapiens]'	NaN	NaN	NaN	NaN	NaN	3	NaN	NaN	0	3	3
652	'>gi|544711041|ref|NP_001269836.1| T-complex protein 1 subunit theta isoform 2 [Homo sapiens]'	NaN	NaN	NaN	NaN	NaN	3	NaN	NaN	0	3	3
653	'>gi|5454158|ref|NP_006286.1| valine--tRNA ligase [Homo sapiens]'	NaN	NaN	3	NaN	NaN	NaN	NaN	NaN	0	3	3
654	'>gi|54792138|ref|NP_055692.2| probable helicase with zinc finger domain [Homo sapiens]'	NaN	NaN	3	NaN	NaN	NaN	NaN	NaN	0	3	3
655	'>gi|550544217|ref|NP_001272368.1| rapamycin-insensitive companion of mTOR isoform 2 [Homo sapiens]'	NaN	NaN	3	NaN	NaN	NaN	NaN	NaN	0	3	3
656	'>gi|557636736|ref|NP_001273554.1| RNA-binding protein with serine-rich domain 1 isoform a [Homo sapiens]'	NaN	3	NaN	NaN	NaN	NaN	NaN	NaN	0	3	3
657	'>gi|557636741|ref|NP_001273556.1| RNA-binding protein with serine-rich domain 1 isoform c [Homo sapiens]'	3	NaN	NaN	NaN	NaN	NaN	NaN	NaN	0	3	3
658	'''>gi|5730027|ref|NP_006550.1| KH domain-containing, RNA-binding, signal transduction-associated protein 1 isoform 1 [Homo sapiens...'' <Preview truncated at 128 characters>'	NaN	NaN	NaN	NaN	3	NaN	NaN	NaN	0	3	3
659	'>gi|578800538|ref|XP_006711225.1| PREDICTED: lysophospholipase-like protein 1 isoform X5 [Homo sapiens]'	NaN	NaN	NaN	NaN	NaN	3	NaN	NaN	0	3	3
660	'>gi|578823772|ref|XP_006719480.1| PREDICTED: nascent polypeptide-associated complex subunit alpha isoform X6 [Homo sapiens]'	NaN	NaN	NaN	NaN	NaN	3	NaN	NaN	0	3	3
661	'>gi|578829853|ref|XP_006721570.1| PREDICTED: active breakpoint cluster region-related protein isoform X2 [Homo sapiens]'	NaN	NaN	3	NaN	NaN	NaN	NaN	NaN	0	3	3
662	'''>gi|578840069|ref|XP_006725286.1| PREDICTED: pyridoxal-dependent decarboxylase domain-containing protein 1-like isoform X1 [Homo...'' <Preview truncated at 128 characters>'	NaN	NaN	NaN	3	NaN	NaN	NaN	NaN	0	3	3
663	'>gi|59710109|ref|NP_057673.2| complex I assembly factor TIMMDC1, mitochondrial precursor [Homo sapiens]'	NaN	NaN	NaN	NaN	NaN	3	NaN	NaN	0	3	3
664	'>gi|6005942|ref|NP_009057.1| transitional endoplasmic reticulum ATPase [Homo sapiens]'	NaN	NaN	NaN	3	NaN	NaN	NaN	NaN	0	3	3
665	'>gi|6041669|ref|NP_004538.2| NADH dehydrogenase [ubiquinone] 1 beta subcomplex subunit 4 isoform 1 [Homo sapiens]'	NaN	NaN	NaN	NaN	NaN	NaN	3	NaN	0	3	3
666	'>gi|63054868|ref|NP_001017964.1| UPF0249 protein ydjC homolog [Homo sapiens]'	NaN	NaN	NaN	NaN	NaN	NaN	NaN	3	0	3	3
667	'>gi|66363694|ref|NP_001018238.1| HCLS1-associated protein X-1 isoform b [Homo sapiens]'	NaN	NaN	NaN	NaN	3	NaN	NaN	NaN	0	3	3
668	'>gi|664806037|ref|NP_001287758.1| cold-inducible RNA-binding protein isoform 3 [Homo sapiens]'	NaN	NaN	NaN	NaN	NaN	NaN	3	NaN	0	3	3
669	'>gi|68509926|ref|NP_001349.2| putative pre-mRNA-splicing factor ATP-dependent RNA helicase DHX15 [Homo sapiens]'	NaN	NaN	NaN	3	NaN	NaN	NaN	NaN	0	3	3
670	'>gi|70778918|ref|NP_002207.2| inter-alpha-trypsin inhibitor heavy chain H2 precursor [Homo sapiens]'	NaN	NaN	3	NaN	NaN	NaN	NaN	NaN	0	3	3
671	'>gi|71979932|ref|NP_003477.4| large neutral amino acids transporter small subunit 1 [Homo sapiens]'	NaN	NaN	NaN	NaN	NaN	3	NaN	NaN	0	3	3
672	'>gi|7657015|ref|NP_055121.1| tRNA-splicing ligase RtcB homolog [Homo sapiens]'	NaN	NaN	NaN	NaN	3	NaN	NaN	NaN	0	3	3
673	'>gi|7661914|ref|NP_055629.1| 26S proteasome non-ATPase regulatory subunit 6 isoform 2 [Homo sapiens]'	NaN	NaN	NaN	NaN	NaN	3	NaN	NaN	0	3	3
674	'>gi|7661948|ref|NP_055545.1| malectin precursor [Homo sapiens]'	NaN	NaN	NaN	NaN	NaN	3	NaN	NaN	0	3	3
675	'>gi|7706343|ref|NP_057146.1| mitotic spindle-associated MMXD complex subunit MIP18 [Homo sapiens]'	NaN	NaN	NaN	NaN	NaN	NaN	3	NaN	0	3	3
676	'>gi|78214522|ref|NP_001030335.1| 60S ribosomal protein L38 [Homo sapiens]'	NaN	NaN	NaN	NaN	NaN	NaN	3	NaN	0	3	3
677	'>gi|8923421|ref|NP_060297.1| serine--tRNA ligase, mitochondrial isoform b precursor [Homo sapiens]'	NaN	NaN	NaN	NaN	3	NaN	NaN	NaN	0	3	3
678	'>gi|94681046|ref|NP_064569.3| metal transporter CNNM4 precursor [Homo sapiens]'	NaN	NaN	NaN	3	NaN	NaN	NaN	NaN	0	3	3
679	'>gi|9624998|ref|NP_062543.1| heterogeneous nuclear ribonucleoprotein H2 [Homo sapiens]'	NaN	NaN	NaN	NaN	3	NaN	NaN	NaN	0	3	3
680	'>gi|115298657|ref|NP_002954.2| protein S100-A7 [Homo sapiens]'	2	NaN	2	2	NaN	2	1	1	0	2	10
681	'>gi|260436922|ref|NP_001159506.1| suprabasin isoform 1 precursor [Homo sapiens]'	1	2	2	2	NaN	2	1	NaN	0	2	10
682	'>gi|4504253|ref|NP_002096.1| histone H2AX [Homo sapiens]'	NaN	2	NaN	2	NaN	2	2	NaN	0	2	8
683	'>gi|155722983|ref|NP_057376.2| heat shock protein 75 kDa, mitochondrial isoform 1 precursor [Homo sapiens]'	1	1	2	1	1	NaN	NaN	NaN	0	2	6
684	'>gi|226529917|ref|NP_001152759.1| triosephosphate isomerase isoform 2 [Homo sapiens]'	1	NaN	1	1	NaN	2	1	NaN	0	2	6
685	'>gi|4505931|ref|NP_002681.1| DNA polymerase beta [Homo sapiens]'	1	1	NaN	NaN	2	NaN	1	1	0	2	6
686	'>ST3-N-NSP1'	2	2	NaN	NaN	NaN	NaN	NaN	1	0	2	5
687	'>gi|110349786|ref|NP_055935.4| Alstrom syndrome protein 1 [Homo sapiens]'	1	NaN	NaN	NaN	NaN	NaN	2	1	0	2	4
688	'>gi|113722133|ref|NP_055861.3| probable helicase senataxin [Homo sapiens]'	NaN	NaN	NaN	NaN	2	2	NaN	NaN	0	2	4
689	'>gi|116268105|ref|NP_689565.2| protein FAM210A [Homo sapiens]'	NaN	NaN	NaN	NaN	NaN	2	2	NaN	0	2	4
690	'>gi|118572613|ref|NP_057417.3| serine/arginine repetitive matrix protein 2 [Homo sapiens]'	2	NaN	NaN	2	NaN	NaN	NaN	NaN	0	2	4
691	'>gi|119943112|ref|NP_001351.2| 7-dehydrocholesterol reductase [Homo sapiens]'	NaN	NaN	NaN	NaN	2	2	NaN	NaN	0	2	4
692	'>gi|15431290|ref|NP_000966.2| 60S ribosomal protein L11 isoform 1 [Homo sapiens]'	NaN	NaN	NaN	NaN	NaN	2	2	NaN	0	2	4
693	'>gi|195927006|ref|NP_001124319.1| apoptosis-inducing factor 1, mitochondrial isoform 5 precursor [Homo sapiens]'	1	2	NaN	NaN	NaN	NaN	1	NaN	0	2	4
694	'>gi|195963398|ref|NP_001124384.1| suppressor of G2 allele of SKP1 homolog isoform SGT1B [Homo sapiens]'	NaN	NaN	NaN	NaN	2	2	NaN	NaN	0	2	4
695	'>gi|21687129|ref|NP_660309.1| nudC domain-containing protein 2 [Homo sapiens]'	NaN	NaN	NaN	NaN	NaN	2	2	NaN	0	2	4
696	'>gi|306482646|ref|NP_001182356.1| serine/arginine-rich splicing factor 2 [Homo sapiens]'	2	1	1	NaN	NaN	NaN	NaN	NaN	0	2	4
697	'>gi|330340389|ref|NP_001193356.1| up-regulated during skeletal muscle growth protein 5 [Homo sapiens]'	NaN	NaN	NaN	NaN	NaN	NaN	2	2	0	2	4
698	'>gi|4503113|ref|NP_001314.1| cystatin-M precursor [Homo sapiens]'	1	NaN	NaN	NaN	NaN	NaN	2	1	0	2	4
699	'>gi|4504347|ref|NP_000549.1| hemoglobin subunit alpha [Homo sapiens]'	2	NaN	2	NaN	NaN	NaN	NaN	NaN	0	2	4
700	'>gi|4506625|ref|NP_000981.1| 60S ribosomal protein L27a [Homo sapiens]'	NaN	NaN	NaN	NaN	NaN	2	2	NaN	0	2	4
701	'>gi|4507879|ref|NP_003365.1| voltage-dependent anion-selective channel protein 1 [Homo sapiens]'	NaN	NaN	NaN	NaN	NaN	2	2	NaN	0	2	4
702	'>gi|45827701|ref|NP_005119.2| protein dopey-2 [Homo sapiens]'	NaN	2	2	NaN	NaN	NaN	NaN	NaN	0	2	4
703	'>gi|507834128|ref|NP_001002252.2| ADP-ribosylation factor-like protein 6-interacting protein 4 isoform 4 [Homo sapiens]'	2	2	NaN	NaN	NaN	NaN	NaN	NaN	0	2	4
704	'>gi|62460637|ref|NP_078934.3| importin-4 [Homo sapiens]'	NaN	NaN	2	2	NaN	NaN	NaN	NaN	0	2	4
705	'>gi|88853865|ref|NP_001034702.1| isoamyl acetate-hydrolyzing esterase 1 homolog precursor [Homo sapiens]'	NaN	2	2	NaN	NaN	NaN	NaN	NaN	0	2	4
706	'>gi|12408675|ref|NP_036526.2| prefoldin subunit 2 [Homo sapiens]'	NaN	NaN	NaN	NaN	NaN	1	2	NaN	0	2	3
707	'>gi|13676857|ref|NP_068814.2| heat shock-related 70 kDa protein 2 [Homo sapiens]'	NaN	NaN	NaN	1	2	NaN	NaN	NaN	0	2	3
708	'>gi|156564363|ref|NP_525125.2| tubulin alpha-3C/D chain [Homo sapiens]'	NaN	NaN	NaN	1	2	NaN	NaN	NaN	0	2	3
709	'>gi|19923967|ref|NP_612446.1| G-protein coupled receptor-associated sorting protein 2 [Homo sapiens]'	NaN	NaN	1	2	NaN	NaN	NaN	NaN	0	2	3
710	'>gi|20143480|ref|NP_003809.1| phosphatidate cytidylyltransferase 2 [Homo sapiens]'	NaN	NaN	NaN	NaN	2	1	NaN	NaN	0	2	3
711	'>gi|21361875|ref|NP_116249.2| protein LTV1 homolog [Homo sapiens]'	1	NaN	NaN	NaN	2	NaN	NaN	NaN	0	2	3
712	'>gi|219802857|ref|NP_001137315.1| transmembrane protein 106C isoform b [Homo sapiens]'	NaN	NaN	NaN	NaN	1	2	NaN	NaN	0	2	3
713	'>gi|239582772|ref|NP_078796.2| uncharacterized protein C2orf47, mitochondrial precursor [Homo sapiens]'	NaN	NaN	NaN	NaN	NaN	2	1	NaN	0	2	3
714	'>gi|261878552|ref|NP_001159889.1| afadin- and alpha-actinin-binding protein isoform 1 [Homo sapiens]'	NaN	NaN	NaN	2	1	NaN	NaN	NaN	0	2	3
715	'>gi|301601644|ref|NP_001180422.1| neutral amino acid transporter A isoform 2 precursor [Homo sapiens]'	NaN	NaN	NaN	1	2	NaN	NaN	NaN	0	2	3
716	'>gi|332164781|ref|NP_001193728.1| pyruvate kinase PKM isoform f [Homo sapiens]'	NaN	NaN	NaN	1	2	NaN	NaN	NaN	0	2	3
717	'>gi|382546190|ref|NP_001244264.1| ATP synthase subunit alpha, mitochondrial isoform c [Homo sapiens]'	NaN	NaN	1	NaN	NaN	2	NaN	NaN	0	2	3
718	'>gi|4502171|ref|NP_000476.1| adenine phosphoribosyltransferase isoform a [Homo sapiens]'	NaN	NaN	NaN	NaN	NaN	1	2	NaN	0	2	3
719	'>gi|4502281|ref|NP_001670.1| sodium/potassium-transporting ATPase subunit beta-3 [Homo sapiens]'	NaN	NaN	NaN	NaN	1	2	NaN	NaN	0	2	3
720	'>gi|4506597|ref|NP_000967.1| 60S ribosomal protein L12 [Homo sapiens]'	NaN	NaN	NaN	NaN	NaN	2	1	NaN	0	2	3
721	'>gi|4506901|ref|NP_003008.1| serine/arginine-rich splicing factor 3 [Homo sapiens]'	NaN	NaN	NaN	NaN	NaN	2	1	NaN	0	2	3
722	'>gi|4757988|ref|NP_004795.1| probable cytosolic iron-sulfur protein assembly protein CIAO1 [Homo sapiens]'	NaN	NaN	NaN	NaN	1	2	NaN	NaN	0	2	3
723	'>gi|4758256|ref|NP_004085.1| eukaryotic translation initiation factor 2 subunit 1 [Homo sapiens]'	NaN	1	NaN	NaN	NaN	2	NaN	NaN	0	2	3
724	'>gi|532524990|ref|NP_001269138.1| sigma non-opioid intracellular receptor 1 isoform 10 [Homo sapiens]'	NaN	NaN	NaN	NaN	NaN	1	2	NaN	0	2	3
725	'>gi|5729850|ref|NP_006487.1| guanine nucleotide-binding protein G(k) subunit alpha [Homo sapiens]'	NaN	NaN	NaN	NaN	2	1	NaN	NaN	0	2	3
726	'>gi|60499025|ref|NP_001012533.1| ferrochelatase, mitochondrial isoform a precursor [Homo sapiens]'	NaN	NaN	NaN	NaN	2	1	NaN	NaN	0	2	3
727	'>gi|68160922|ref|NP_001020242.1| 40S ribosomal protein S14 [Homo sapiens]'	NaN	NaN	NaN	NaN	NaN	1	2	NaN	0	2	3
728	'>gi|75677353|ref|NP_114127.3| ATPase family AAA domain-containing protein 3B [Homo sapiens]'	NaN	NaN	2	1	NaN	NaN	NaN	NaN	0	2	3
729	'>gi|94536848|ref|NP_060888.2| spermatogenesis-associated protein 7 isoform 1 [Homo sapiens]'	1	NaN	NaN	NaN	NaN	NaN	2	NaN	0	2	3
730	'>gi|9910382|ref|NP_064628.1| mitochondrial import receptor subunit TOM22 homolog [Homo sapiens]'	NaN	NaN	NaN	NaN	NaN	1	2	NaN	0	2	3
731	'>gi|10190712|ref|NP_065723.1| protein S100-A14 [Homo sapiens]'	NaN	NaN	NaN	NaN	NaN	2	NaN	NaN	0	2	2
732	'>gi|106775678|ref|NP_001035807.1| histone H2A type 2-A [Homo sapiens]'	2	NaN	NaN	NaN	NaN	NaN	NaN	NaN	0	2	2
733	'>gi|109689718|ref|NP_001035937.1| monoacylglycerol lipase ABHD12 isoform a [Homo sapiens]'	NaN	NaN	NaN	NaN	2	NaN	NaN	NaN	0	2	2
734	'>gi|116812591|ref|NP_008964.3| protein RER1 [Homo sapiens]'	NaN	NaN	NaN	NaN	NaN	NaN	2	NaN	0	2	2
735	'>gi|117168277|ref|NP_001070952.1| sodium-coupled neutral amino acid transporter 1 isoform 1 [Homo sapiens]'	NaN	NaN	NaN	2	NaN	NaN	NaN	NaN	0	2	2
736	'>gi|119964726|ref|NP_000867.2| cation-independent mannose-6-phosphate receptor precursor [Homo sapiens]'	NaN	2	NaN	NaN	NaN	NaN	NaN	NaN	0	2	2
737	'>gi|13124881|ref|NP_074036.1| core-binding factor subunit beta isoform 1 [Homo sapiens]'	NaN	NaN	NaN	NaN	NaN	2	NaN	NaN	0	2	2
738	'>gi|13128860|ref|NP_004955.2| histone deacetylase 1 [Homo sapiens]'	NaN	NaN	NaN	NaN	2	NaN	NaN	NaN	0	2	2
739	'>gi|13129016|ref|NP_076955.1| DET1- and DDB1-associated protein 1 [Homo sapiens]'	NaN	NaN	NaN	NaN	NaN	NaN	2	NaN	0	2	2
740	'>gi|13194195|ref|NP_055942.1| chloride channel CLIC-like protein 1 isoform 2 precursor [Homo sapiens]'	NaN	NaN	NaN	NaN	2	NaN	NaN	NaN	0	2	2
741	'>gi|13236579|ref|NP_077306.1| long-chain fatty acid transport protein 3 [Homo sapiens]'	NaN	NaN	NaN	2	NaN	NaN	NaN	NaN	0	2	2
742	'>gi|133925809|ref|NP_002208.3| inter-alpha-trypsin inhibitor heavy chain H3 preproprotein [Homo sapiens]'	NaN	NaN	2	NaN	NaN	NaN	NaN	NaN	0	2	2
743	'>gi|134133226|ref|NP_001077007.1| POTE ankyrin domain family member E [Homo sapiens]'	NaN	NaN	NaN	NaN	2	NaN	NaN	NaN	0	2	2
744	'>gi|13491166|ref|NP_055491.1| pumilio homolog 1 isoform 2 [Homo sapiens]'	NaN	NaN	2	NaN	NaN	NaN	NaN	NaN	0	2	2
745	'>gi|14042927|ref|NP_114405.1| MLN64 N-terminal domain homolog [Homo sapiens]'	NaN	NaN	NaN	NaN	NaN	2	NaN	NaN	0	2	2
746	'>gi|145580608|ref|NP_001077430.1| WD repeat-containing protein 62 isoform 1 [Homo sapiens]'	NaN	NaN	2	NaN	NaN	NaN	NaN	NaN	0	2	2
747	'>gi|148368978|ref|NP_689512.2| condensin-2 complex subunit H2 isoform 2 [Homo sapiens]'	NaN	NaN	NaN	2	NaN	NaN	NaN	NaN	0	2	2
748	'>gi|148727288|ref|NP_002327.2| low-density lipoprotein receptor-related protein 6 precursor [Homo sapiens]'	NaN	NaN	2	NaN	NaN	NaN	NaN	NaN	0	2	2
749	'>gi|149158696|ref|NP_001092004.1| large proline-rich protein BAG6 isoform b [Homo sapiens]'	NaN	NaN	2	NaN	NaN	NaN	NaN	NaN	0	2	2
750	'>gi|153252214|ref|NP_001092876.1| zinc transporter ZIP6 isoform 2 [Homo sapiens]'	NaN	NaN	NaN	NaN	2	NaN	NaN	NaN	0	2	2
751	'>gi|156142178|ref|NP_054886.2| thyroid transcription factor 1-associated protein 26 [Homo sapiens]'	NaN	NaN	NaN	NaN	NaN	2	NaN	NaN	0	2	2
752	'>gi|156415990|ref|NP_057066.2| Y-box-binding protein 2 [Homo sapiens]'	NaN	NaN	NaN	NaN	NaN	2	NaN	NaN	0	2	2
753	'>gi|156713442|ref|NP_001096137.1| proteasome subunit alpha type-4 isoform 1 [Homo sapiens]'	NaN	NaN	NaN	NaN	NaN	2	NaN	NaN	0	2	2
754	'>gi|157168349|ref|NP_001093254.2| F-box/LRR-repeat protein 19 isoform 1 [Homo sapiens]'	NaN	2	NaN	NaN	NaN	NaN	NaN	NaN	0	2	2
755	'>gi|157266264|ref|NP_942147.3| pleckstrin homology-like domain family B member 3 [Homo sapiens]'	NaN	NaN	NaN	2	NaN	NaN	NaN	NaN	0	2	2
756	'>gi|15890086|ref|NP_203699.1| collagen alpha-5(IV) chain isoform 2 precursor [Homo sapiens]'	NaN	NaN	NaN	NaN	2	NaN	NaN	NaN	0	2	2
757	'>gi|167234419|ref|NP_005110.2| thyroid hormone receptor-associated protein 3 [Homo sapiens]'	NaN	NaN	2	NaN	NaN	NaN	NaN	NaN	0	2	2
758	'>gi|169790833|ref|NP_001116078.1| lysosome-associated membrane glycoprotein 2 isoform C precursor [Homo sapiens]'	NaN	NaN	2	NaN	NaN	NaN	NaN	NaN	0	2	2
759	'>gi|170763508|ref|NP_001116295.1| general transcription factor 3C polypeptide 5 isoform 1 [Homo sapiens]'	NaN	NaN	NaN	NaN	2	NaN	NaN	NaN	0	2	2
760	'>gi|170763515|ref|NP_071443.2| doublesex- and mab-3-related transcription factor A1 [Homo sapiens]'	NaN	NaN	NaN	NaN	NaN	2	NaN	NaN	0	2	2
761	'>gi|17986258|ref|NP_066299.2| myosin light polypeptide 6 isoform 1 [Homo sapiens]'	NaN	NaN	NaN	NaN	NaN	NaN	2	NaN	0	2	2
762	'>gi|183227703|ref|NP_001116698.1| protein MTO1 homolog, mitochondrial isoform c [Homo sapiens]'	NaN	NaN	NaN	NaN	2	NaN	NaN	NaN	0	2	2
763	'>gi|18375648|ref|NP_542415.1| tyrosine-protein phosphatase non-receptor type 13 isoform 3 [Homo sapiens]'	NaN	2	NaN	NaN	NaN	NaN	NaN	NaN	0	2	2
764	'>gi|18378731|ref|NP_064620.2| HMG box transcription factor BBX isoform 2 [Homo sapiens]'	NaN	NaN	NaN	2	NaN	NaN	NaN	NaN	0	2	2
765	'>gi|187281616|ref|NP_077718.3| NADH dehydrogenase [ubiquinone] iron-sulfur protein 7, mitochondrial [Homo sapiens]'	NaN	NaN	NaN	NaN	NaN	NaN	2	NaN	0	2	2
766	'>gi|187608545|ref|NP_001120654.1| centrosomal protein of 55 kDa [Homo sapiens]'	NaN	NaN	NaN	NaN	2	NaN	NaN	NaN	0	2	2
767	'>gi|190014578|ref|NP_054735.3| phosphatidylinositide phosphatase SAC1 [Homo sapiens]'	NaN	NaN	NaN	NaN	2	NaN	NaN	NaN	0	2	2
768	'>gi|190885493|ref|NP_116287.2| centrosomal protein of 19 kDa [Homo sapiens]'	NaN	NaN	NaN	NaN	NaN	NaN	NaN	2	0	2	2
769	'>gi|193083114|ref|NP_001122386.1| poly(rC)-binding protein 2 isoform g [Homo sapiens]'	NaN	NaN	NaN	NaN	NaN	NaN	2	NaN	0	2	2
770	'>gi|194473724|ref|NP_001123996.1| AP-1 complex subunit mu-1 isoform 1 [Homo sapiens]'	NaN	NaN	NaN	NaN	2	NaN	NaN	NaN	0	2	2
771	'>gi|194688135|ref|NP_001124161.1| high mobility group protein B2 [Homo sapiens]'	2	NaN	NaN	NaN	NaN	NaN	NaN	NaN	0	2	2
772	'>gi|197116386|ref|NP_001127703.1| 5''-nucleotidase domain-containing protein 2 isoform 1 [Homo sapiens]'	NaN	NaN	NaN	NaN	2	NaN	NaN	NaN	0	2	2
773	'>gi|19923198|ref|NP_001745.2| runt-related transcription factor 1 isoform AML1c [Homo sapiens]'	NaN	NaN	NaN	NaN	2	NaN	NaN	NaN	0	2	2
774	'>gi|19924129|ref|NP_005723.2| DNA repair protein RAD50 [Homo sapiens]'	2	NaN	NaN	NaN	NaN	NaN	NaN	NaN	0	2	2
775	'>gi|20070344|ref|NP_079426.2| threonine--tRNA ligase, mitochondrial isoform a [Homo sapiens]'	NaN	NaN	NaN	2	NaN	NaN	NaN	NaN	0	2	2
776	'>gi|20149598|ref|NP_036272.2| mitochondrial dicarboxylate carrier isoform 2 [Homo sapiens]'	NaN	NaN	NaN	NaN	NaN	2	NaN	NaN	0	2	2
777	'>gi|207029415|ref|NP_001128727.1| histone-binding protein RBBP4 isoform b [Homo sapiens]'	NaN	NaN	NaN	NaN	2	NaN	NaN	NaN	0	2	2
778	'''>gi|209862760|ref|NP_001129470.1| NADH dehydrogenase [ubiquinone] 1 beta subcomplex subunit 11, mitochondrial isoform 2 [Homo sa...'' <Preview truncated at 128 characters>'	NaN	NaN	NaN	NaN	NaN	NaN	2	NaN	0	2	2
779	'>gi|209969838|ref|NP_001129668.1| transportin-2 isoform 1 [Homo sapiens]'	NaN	NaN	NaN	2	NaN	NaN	NaN	NaN	0	2	2
780	'>gi|21071001|ref|NP_001135.3| E3 ubiquitin-protein ligase AMFR [Homo sapiens]'	NaN	NaN	NaN	2	NaN	NaN	NaN	NaN	0	2	2
781	'>gi|21265093|ref|NP_115866.1| 39S ribosomal protein L41, mitochondrial [Homo sapiens]'	NaN	NaN	NaN	NaN	NaN	NaN	2	NaN	0	2	2
782	'>gi|21361659|ref|NP_060555.2| importin-9 [Homo sapiens]'	NaN	NaN	NaN	2	NaN	NaN	NaN	NaN	0	2	2
783	'>gi|214830079|ref|NP_001135766.1| spartin [Homo sapiens]'	NaN	NaN	NaN	2	NaN	NaN	NaN	NaN	0	2	2
784	'>gi|21536288|ref|NP_001815.2| creatine kinase M-type [Homo sapiens]'	NaN	NaN	2	NaN	NaN	NaN	NaN	NaN	0	2	2
785	'>gi|21536428|ref|NP_004618.2| tail-anchored protein insertion receptor WRB isoform 1 [Homo sapiens]'	NaN	NaN	NaN	NaN	NaN	NaN	2	NaN	0	2	2
786	'>gi|21536449|ref|NP_002613.2| prefoldin subunit 1 [Homo sapiens]'	NaN	NaN	NaN	NaN	NaN	NaN	2	NaN	0	2	2
787	'>gi|215983058|ref|NP_115497.4| magnesium transporter protein 1 [Homo sapiens]'	NaN	NaN	NaN	NaN	NaN	2	NaN	NaN	0	2	2
788	'>gi|22035696|ref|NP_004702.2| synaptogyrin-1 isoform 1a [Homo sapiens]'	NaN	NaN	NaN	NaN	NaN	NaN	2	NaN	0	2	2
789	'>gi|223890252|ref|NP_066973.2| glutamate receptor-interacting protein 1 isoform 1 [Homo sapiens]'	NaN	NaN	2	NaN	NaN	NaN	NaN	NaN	0	2	2
790	'>gi|224282119|ref|NP_001017392.2| SURP and G-patch domain-containing protein 2 [Homo sapiens]'	NaN	NaN	2	NaN	NaN	NaN	NaN	NaN	0	2	2
791	'>gi|224493847|ref|NP_001139013.1| T-complex protein 11-like protein 1 [Homo sapiens]'	NaN	NaN	NaN	NaN	2	NaN	NaN	NaN	0	2	2
792	'>gi|226246533|ref|NP_001139660.1| TOX high mobility group box family member 3 isoform 2 [Homo sapiens]'	NaN	NaN	NaN	2	NaN	NaN	NaN	NaN	0	2	2
793	'>gi|23510448|ref|NP_006730.2| DNA replication licensing factor MCM5 [Homo sapiens]'	NaN	NaN	NaN	2	NaN	NaN	NaN	NaN	0	2	2
794	'>gi|236459851|ref|NP_775840.3| ubinuclein-2 [Homo sapiens]'	NaN	2	NaN	NaN	NaN	NaN	NaN	NaN	0	2	2
795	'>gi|238231392|ref|NP_982272.2| dedicator of cytokinesis protein 8 isoform 1 [Homo sapiens]'	NaN	NaN	NaN	2	NaN	NaN	NaN	NaN	0	2	2
796	'>gi|24308201|ref|NP_065392.1| adipocyte plasma membrane-associated protein [Homo sapiens]'	NaN	NaN	NaN	NaN	2	NaN	NaN	NaN	0	2	2
797	'>gi|25188193|ref|NP_741995.1| ras-related protein Rab-39B [Homo sapiens]'	NaN	NaN	NaN	NaN	NaN	NaN	2	NaN	0	2	2
798	'>gi|255652947|ref|NP_001157394.1| V-set and immunoglobulin domain-containing protein 10-like precursor [Homo sapiens]'	NaN	NaN	NaN	NaN	NaN	2	NaN	NaN	0	2	2
799	'>gi|256222019|ref|NP_057215.3| ras-related protein Rab-10 [Homo sapiens]'	NaN	NaN	NaN	NaN	NaN	2	NaN	NaN	0	2	2
800	'>gi|25777713|ref|NP_733779.1| S-phase kinase-associated protein 1 isoform b [Homo sapiens]'	NaN	NaN	NaN	NaN	NaN	NaN	2	NaN	0	2	2
801	'>gi|258613875|ref|NP_056308.3| KN motif and ankyrin repeat domain-containing protein 2 isoform 1 [Homo sapiens]'	NaN	NaN	NaN	2	NaN	NaN	NaN	NaN	0	2	2
802	'>gi|261490708|ref|NP_001159776.1| phosphatidylinositol-glycan biosynthesis class X protein isoform 1 precursor [Homo sapiens]'	NaN	NaN	NaN	NaN	NaN	2	NaN	NaN	0	2	2
803	'>gi|27477134|ref|NP_079199.2| nuclear pore membrane glycoprotein 210 precursor [Homo sapiens]'	NaN	NaN	2	NaN	NaN	NaN	NaN	NaN	0	2	2
804	'>gi|27477136|ref|NP_064504.2| zinc finger CCCH-type antiviral protein 1 isoform 1 [Homo sapiens]'	NaN	NaN	NaN	2	NaN	NaN	NaN	NaN	0	2	2
805	'>gi|28076869|ref|NP_002965.1| serpin B4 isoform 1 [Homo sapiens]'	2	NaN	NaN	NaN	NaN	NaN	NaN	NaN	0	2	2
806	'>gi|28373115|ref|NP_777618.1| sarcoplasmic/endoplasmic reticulum calcium ATPase 3 isoform c [Homo sapiens]'	NaN	NaN	NaN	2	NaN	NaN	NaN	NaN	0	2	2
807	'>gi|284795266|ref|NP_067026.3| signal recognition particle receptor subunit beta [Homo sapiens]'	NaN	NaN	NaN	NaN	NaN	2	NaN	NaN	0	2	2
808	'>gi|288806587|ref|NP_001165774.1| serine/threonine-protein kinase greatwall isoform 1 [Homo sapiens]'	NaN	NaN	NaN	2	NaN	NaN	NaN	NaN	0	2	2
809	'>gi|29029591|ref|NP_803188.1| putative tRNA (cytidine(32)/guanosine(34)-2''-O)-methyltransferase isoform b [Homo sapiens]'	NaN	NaN	NaN	NaN	2	NaN	NaN	NaN	0	2	2
810	'>gi|29893557|ref|NP_003334.2| ubiquitin-conjugating enzyme E2 G2 isoform 1 [Homo sapiens]'	NaN	NaN	NaN	NaN	NaN	NaN	2	NaN	0	2	2
811	'>gi|299758465|ref|NP_073608.4| TBC1 domain family member 15 isoform 1 [Homo sapiens]'	NaN	NaN	NaN	2	NaN	NaN	NaN	NaN	0	2	2
812	'>gi|301171475|ref|NP_001180346.1| ATP-dependent RNA helicase DDX3X isoform 3 [Homo sapiens]'	NaN	NaN	2	NaN	NaN	NaN	NaN	NaN	0	2	2
813	'>gi|30795212|ref|NP_006538.2| insulin-like growth factor 2 mRNA-binding protein 3 [Homo sapiens]'	NaN	NaN	NaN	NaN	2	NaN	NaN	NaN	0	2	2
814	'>gi|31455614|ref|NP_057125.2| derlin-2 [Homo sapiens]'	NaN	NaN	NaN	NaN	NaN	NaN	2	NaN	0	2	2
815	'>gi|321267477|ref|NP_001189398.1| protein NipSnap homolog 2 isoform 2 [Homo sapiens]'	NaN	NaN	NaN	NaN	NaN	2	NaN	NaN	0	2	2
816	'>gi|323276700|ref|NP_001191020.1| 40S ribosomal protein S10 [Homo sapiens]'	NaN	NaN	NaN	NaN	NaN	NaN	2	NaN	0	2	2
817	'>gi|32483416|ref|NP_066554.2| neurofilament heavy polypeptide [Homo sapiens]'	NaN	NaN	2	NaN	NaN	NaN	NaN	NaN	0	2	2
818	'>gi|325652048|ref|NP_001191793.1| transcription elongation factor B polypeptide 1 isoform b [Homo sapiens]'	NaN	NaN	NaN	NaN	NaN	2	NaN	NaN	0	2	2
819	'>gi|326381123|ref|NP_001191948.1| glycerol kinase isoform d [Homo sapiens]'	NaN	NaN	NaN	NaN	2	NaN	NaN	NaN	0	2	2
820	'>gi|32698700|ref|NP_055922.1| histone lysine demethylase PHF8 isoform 2 [Homo sapiens]'	NaN	NaN	NaN	NaN	NaN	NaN	NaN	2	0	2	2
821	'>gi|338827763|ref|NP_001229791.1| cAMP-dependent protein kinase catalytic subunit beta isoform 9 [Homo sapiens]'	NaN	NaN	NaN	NaN	2	NaN	NaN	NaN	0	2	2
822	'>gi|33946291|ref|NP_079106.3| lysophosphatidylcholine acyltransferase 1 [Homo sapiens]'	NaN	NaN	NaN	NaN	2	NaN	NaN	NaN	0	2	2
823	'>gi|34098946|ref|NP_004550.2| nuclease-sensitive element-binding protein 1 [Homo sapiens]'	NaN	NaN	NaN	NaN	2	NaN	NaN	NaN	0	2	2
824	'>gi|351722051|ref|NP_001234937.1| ski-like protein isoform 1 [Homo sapiens]'	NaN	NaN	NaN	NaN	NaN	2	NaN	NaN	0	2	2
825	'>gi|371122551|ref|NP_001243053.1| tripartite motif-containing protein 65 isoform 2 [Homo sapiens]'	NaN	NaN	NaN	NaN	2	NaN	NaN	NaN	0	2	2
826	'>gi|371940940|ref|NP_001243143.1| sodium/potassium-transporting ATPase subunit alpha-3 isoform 3 [Homo sapiens]'	2	NaN	NaN	NaN	NaN	NaN	NaN	NaN	0	2	2
827	'>gi|374671789|ref|NP_001243442.1| single-stranded DNA-binding protein, mitochondrial precursor [Homo sapiens]'	NaN	NaN	NaN	NaN	NaN	NaN	2	NaN	0	2	2
828	'>gi|38016937|ref|NP_055731.2| serine/threonine-protein kinase LMTK2 precursor [Homo sapiens]'	NaN	NaN	2	NaN	NaN	NaN	NaN	NaN	0	2	2
829	'>gi|38045913|ref|NP_937818.1| nucleoside diphosphate kinase A isoform a [Homo sapiens]'	NaN	NaN	NaN	NaN	NaN	NaN	2	NaN	0	2	2
830	'''>gi|380848751|ref|NP_001244160.1| putative bifunctional UDP-N-acetylglucosamine transferase and deubiquitinase ALG13 isoform 6 [...'' <Preview truncated at 128 characters>'	NaN	NaN	2	NaN	NaN	NaN	NaN	NaN	0	2	2
831	'>gi|38176300|ref|NP_006608.1| nestin [Homo sapiens]'	NaN	NaN	2	NaN	NaN	NaN	NaN	NaN	0	2	2
832	'>gi|38201623|ref|NP_937884.1| eukaryotic translation initiation factor 4 gamma 1 isoform 5 [Homo sapiens]'	NaN	NaN	2	NaN	NaN	NaN	NaN	NaN	0	2	2
833	'>gi|390131988|ref|NP_001254523.1| sentrin-specific protease 1 [Homo sapiens]'	NaN	NaN	NaN	NaN	2	NaN	NaN	NaN	0	2	2
834	'>gi|394582099|ref|NP_001257401.1| DNA replication licensing factor MCM3 isoform 2 [Homo sapiens]'	NaN	NaN	NaN	2	NaN	NaN	NaN	NaN	0	2	2
835	'>gi|39777586|ref|NP_945314.1| putative ATP-dependent RNA helicase DHX57 [Homo sapiens]'	NaN	NaN	2	NaN	NaN	NaN	NaN	NaN	0	2	2
836	'>gi|40255047|ref|NP_079203.3| pleckstrin homology domain-containing family H member 3 precursor [Homo sapiens]'	NaN	NaN	NaN	2	NaN	NaN	NaN	NaN	0	2	2
837	'>gi|40288288|ref|NP_954592.1| histone-arginine methyltransferase CARM1 [Homo sapiens]'	NaN	NaN	NaN	NaN	2	NaN	NaN	NaN	0	2	2
838	'>gi|41281447|ref|NP_055529.2| intraflagellar transport protein 140 homolog [Homo sapiens]'	NaN	NaN	2	NaN	NaN	NaN	NaN	NaN	0	2	2
839	'>gi|42558279|ref|NP_817124.1| tubulin beta-8 chain [Homo sapiens]'	NaN	NaN	NaN	NaN	2	NaN	NaN	NaN	0	2	2
840	'>gi|4501987|ref|NP_001124.1| afamin precursor [Homo sapiens]'	NaN	NaN	NaN	NaN	NaN	NaN	NaN	2	0	2	2
841	'>gi|4501989|ref|NP_001125.1| alpha-fetoprotein precursor [Homo sapiens]'	NaN	NaN	2	NaN	NaN	NaN	NaN	NaN	0	2	2
842	'>gi|4502003|ref|NP_001612.1| aryl hydrocarbon receptor precursor [Homo sapiens]'	NaN	NaN	NaN	2	NaN	NaN	NaN	NaN	0	2	2
843	'>gi|4502277|ref|NP_001668.1| sodium/potassium-transporting ATPase subunit beta-1 [Homo sapiens]'	NaN	NaN	NaN	NaN	2	NaN	NaN	NaN	0	2	2
844	'>gi|4502847|ref|NP_001271.1| cold-inducible RNA-binding protein isoform 1 [Homo sapiens]'	NaN	NaN	NaN	NaN	NaN	2	NaN	NaN	0	2	2
845	'>gi|4503123|ref|NP_001892.1| connective tissue growth factor precursor [Homo sapiens]'	2	NaN	NaN	NaN	NaN	NaN	NaN	NaN	0	2	2
846	'>gi|4503453|ref|NP_003783.1| endothelial differentiation-related factor 1 isoform alpha [Homo sapiens]'	2	NaN	NaN	NaN	NaN	NaN	NaN	NaN	0	2	2
847	'>gi|4504771|ref|NP_002203.1| eukaryotic translation initiation factor 6 isoform a [Homo sapiens]'	NaN	NaN	NaN	NaN	NaN	2	NaN	NaN	0	2	2
848	'>gi|4505219|ref|NP_002414.1| matrilysin preproprotein [Homo sapiens]'	NaN	NaN	NaN	NaN	NaN	2	NaN	NaN	0	2	2
849	'>gi|4506007|ref|NP_002701.1| serine/threonine-protein phosphatase PP1-gamma catalytic subunit isoform 1 [Homo sapiens]'	NaN	NaN	NaN	NaN	NaN	2	NaN	NaN	0	2	2
850	'>gi|4506685|ref|NP_001008.1| 40S ribosomal protein S13 [Homo sapiens]'	NaN	NaN	NaN	NaN	NaN	NaN	2	NaN	0	2	2
851	'>gi|4507951|ref|NP_003396.1| 14-3-3 protein eta [Homo sapiens]'	NaN	NaN	NaN	NaN	NaN	2	NaN	NaN	0	2	2
852	'>gi|4557321|ref|NP_000030.1| apolipoprotein A-I preproprotein [Homo sapiens]'	NaN	NaN	NaN	2	NaN	NaN	NaN	NaN	0	2	2
853	'>gi|4557791|ref|NP_000425.1| sialidase-1 precursor [Homo sapiens]'	NaN	NaN	NaN	NaN	2	NaN	NaN	NaN	0	2	2
854	'>gi|45827690|ref|NP_996749.1| transcription regulator protein BACH1 [Homo sapiens]'	NaN	NaN	NaN	2	NaN	NaN	NaN	NaN	0	2	2
855	'''>gi|46909600|ref|NP_997080.1| disintegrin and metalloproteinase domain-containing protein 15 isoform 6 preproprotein [Homo sapie...'' <Preview truncated at 128 characters>'	NaN	NaN	NaN	2	NaN	NaN	NaN	NaN	0	2	2
856	'>gi|4758032|ref|NP_004757.1| coatomer subunit beta'' [Homo sapiens]'	NaN	NaN	NaN	2	NaN	NaN	NaN	NaN	0	2	2
857	'>gi|4758302|ref|NP_004441.1| enhancer of rudimentary homolog [Homo sapiens]'	NaN	NaN	NaN	NaN	NaN	NaN	2	NaN	0	2	2
858	'>gi|47717104|ref|NP_057025.2| V-type proton ATPase subunit H isoform 1 [Homo sapiens]'	NaN	NaN	NaN	NaN	2	NaN	NaN	NaN	0	2	2
859	'>gi|4885049|ref|NP_005150.1| actin, alpha cardiac muscle 1 proprotein [Homo sapiens]'	NaN	NaN	NaN	NaN	NaN	2	NaN	NaN	0	2	2
860	'>gi|4885065|ref|NP_005157.1| amyloid-like protein 1 isoform 2 precursor [Homo sapiens]'	NaN	NaN	NaN	2	NaN	NaN	NaN	NaN	0	2	2
861	'>gi|4885377|ref|NP_005311.1| histone H1.3 [Homo sapiens]'	2	NaN	NaN	NaN	NaN	NaN	NaN	NaN	0	2	2
862	'>gi|4885393|ref|NP_005321.1| hemoglobin subunit epsilon [Homo sapiens]'	NaN	NaN	NaN	NaN	NaN	NaN	2	NaN	0	2	2
863	'>gi|50345991|ref|NP_001001975.1| ATP synthase subunit delta, mitochondrial precursor [Homo sapiens]'	NaN	NaN	NaN	NaN	NaN	NaN	2	NaN	0	2	2
864	'>gi|508083057|ref|NP_001265318.1| sodium-coupled neutral amino acid transporter 1 isoform 1 [Homo sapiens]'	NaN	NaN	NaN	NaN	2	NaN	NaN	NaN	0	2	2
865	'>gi|51479152|ref|NP_001003785.1| ATP synthase subunit d, mitochondrial isoform b [Homo sapiens]'	NaN	NaN	NaN	NaN	NaN	NaN	2	NaN	0	2	2
866	'>gi|5174613|ref|NP_005960.1| nucleosome assembly protein 1-like 4 [Homo sapiens]'	NaN	NaN	NaN	NaN	2	NaN	NaN	NaN	0	2	2
867	'>gi|518831687|ref|NP_001265532.1| nucleoporin p54 isoform 2 [Homo sapiens]'	NaN	NaN	NaN	NaN	2	NaN	NaN	NaN	0	2	2
868	'>gi|521258690|ref|NP_001265585.1| small nuclear ribonucleoprotein Sm D3 [Homo sapiens]'	NaN	NaN	NaN	NaN	NaN	NaN	2	NaN	0	2	2
869	'>gi|525507390|ref|NP_112598.3| epiplakin [Homo sapiens]'	2	NaN	NaN	NaN	NaN	NaN	NaN	NaN	0	2	2
870	'>gi|526118069|ref|NP_001267473.1| zinc finger protein DPF3 isoform 4 [Homo sapiens]'	2	NaN	NaN	NaN	NaN	NaN	NaN	NaN	0	2	2
871	'>gi|530379665|ref|XP_005271929.1| PREDICTED: AP-3 complex subunit sigma-1 isoform X2 [Homo sapiens]'	NaN	NaN	NaN	NaN	NaN	NaN	2	NaN	0	2	2
872	'>gi|530380502|ref|XP_005268480.1| PREDICTED: glucocorticoid receptor isoform X5 [Homo sapiens]'	NaN	NaN	NaN	2	NaN	NaN	NaN	NaN	0	2	2
873	'>gi|530381027|ref|XP_005265958.1| PREDICTED: heterogeneous nuclear ribonucleoprotein H isoform X7 [Homo sapiens]'	NaN	NaN	NaN	NaN	2	NaN	NaN	NaN	0	2	2
874	'>gi|530382446|ref|XP_005249381.1| PREDICTED: dystonin isoform X15 [Homo sapiens]'	NaN	2	NaN	NaN	NaN	NaN	NaN	NaN	0	2	2
875	'>gi|530391682|ref|XP_005252323.1| PREDICTED: centrosomal protein of 78 kDa isoform X4 [Homo sapiens]'	NaN	NaN	NaN	2	NaN	NaN	NaN	NaN	0	2	2
876	'>gi|530401235|ref|XP_005253911.1| PREDICTED: coiled-coil domain-containing protein 60 isoform X1 [Homo sapiens]'	NaN	NaN	NaN	NaN	2	NaN	NaN	NaN	0	2	2
877	'>gi|530410380|ref|XP_005256727.1| PREDICTED: gem-associated protein 4 isoform X4 [Homo sapiens]'	NaN	NaN	NaN	2	NaN	NaN	NaN	NaN	0	2	2
878	'>gi|530412344|ref|XP_005257481.1| PREDICTED: 28S ribosomal protein S7, mitochondrial isoform X1 [Homo sapiens]'	NaN	NaN	NaN	NaN	NaN	2	NaN	NaN	0	2	2
879	'>gi|530413510|ref|XP_005256420.1| PREDICTED: COP9 signalosome complex subunit 1 isoform X14 [Homo sapiens]'	NaN	NaN	NaN	NaN	2	NaN	NaN	NaN	0	2	2
880	'>gi|530420151|ref|XP_005261691.1| PREDICTED: phosphatidylinositol 4-kinase alpha isoform X1 [Homo sapiens]'	NaN	NaN	2	NaN	NaN	NaN	NaN	NaN	0	2	2
881	'>gi|530424701|ref|XP_005256355.1| PREDICTED: transcription factor 25 isoform X2 [Homo sapiens]'	NaN	NaN	NaN	NaN	2	NaN	NaN	NaN	0	2	2
882	'>gi|53759151|ref|NP_005054.3| acyl-CoA desaturase [Homo sapiens]'	NaN	NaN	NaN	NaN	NaN	2	NaN	NaN	0	2	2
883	'>gi|538921154|ref|NP_001269348.1| NADH dehydrogenase [ubiquinone] 1 alpha subcomplex subunit 5 isoform 2 [Homo sapiens]'	NaN	NaN	NaN	NaN	NaN	NaN	2	NaN	0	2	2
884	'>gi|543583787|ref|NP_001269472.1| BRCA1-associated RING domain protein 1 isoform 2 [Homo sapiens]'	NaN	NaN	NaN	2	NaN	NaN	NaN	NaN	0	2	2
885	'>gi|544063449|ref|NP_001269582.1| stress-induced-phosphoprotein 1 isoform c [Homo sapiens]'	NaN	NaN	NaN	NaN	2	NaN	NaN	NaN	0	2	2
886	'>gi|5453559|ref|NP_006347.1| ATP synthase subunit d, mitochondrial isoform a [Homo sapiens]'	NaN	NaN	NaN	NaN	NaN	2	NaN	NaN	0	2	2
887	'>gi|5454052|ref|NP_006133.1| 14-3-3 protein sigma [Homo sapiens]'	NaN	NaN	NaN	NaN	NaN	2	NaN	NaN	0	2	2
888	'>gi|545746373|ref|NP_001271151.1| elongator complex protein 3 isoform 3 [Homo sapiens]'	NaN	NaN	NaN	NaN	2	NaN	NaN	NaN	0	2	2
889	'>gi|554506526|ref|NP_001273013.1| tRNA methyltransferase 112 homolog isoform 3 [Homo sapiens]'	NaN	NaN	NaN	NaN	NaN	NaN	2	NaN	0	2	2
890	'>gi|55749577|ref|NP_001142.2| ADP/ATP translocase 1 [Homo sapiens]'	NaN	NaN	NaN	NaN	NaN	2	NaN	NaN	0	2	2
891	'>gi|55956921|ref|NP_004490.2| heterogeneous nuclear ribonucleoprotein A/B isoform b [Homo sapiens]'	NaN	NaN	NaN	NaN	2	NaN	NaN	NaN	0	2	2
892	'>gi|56243583|ref|NP_077005.2| WD repeat-containing protein 18 [Homo sapiens]'	NaN	NaN	NaN	NaN	2	NaN	NaN	NaN	0	2	2
893	'>gi|564730689|ref|NP_001274176.1| Bloom syndrome protein isoform 2 [Homo sapiens]'	NaN	NaN	NaN	2	NaN	NaN	NaN	NaN	0	2	2
894	'>gi|565324143|ref|NP_115804.1| FERM and PDZ domain-containing protein 3 [Homo sapiens]'	NaN	NaN	2	NaN	NaN	NaN	NaN	NaN	0	2	2
895	'>gi|56699409|ref|NP_002130.2| RNA-binding motif protein, X chromosome isoform 1 [Homo sapiens]'	NaN	NaN	NaN	NaN	2	NaN	NaN	NaN	0	2	2
896	'>gi|56788364|ref|NP_065194.2| gamma-tubulin complex component 6 [Homo sapiens]'	NaN	NaN	2	NaN	NaN	NaN	NaN	NaN	0	2	2
897	'>gi|5729909|ref|NP_006542.1| secretoglobin family 1D member 2 precursor [Homo sapiens]'	NaN	NaN	NaN	NaN	NaN	2	NaN	NaN	0	2	2
898	'>gi|573014787|ref|NP_001275935.1| transmembrane 9 superfamily member 1 isoform c [Homo sapiens]'	NaN	NaN	NaN	NaN	2	NaN	NaN	NaN	0	2	2
899	'>gi|577019580|ref|NP_001276753.1| furin preproprotein [Homo sapiens]'	NaN	NaN	NaN	2	NaN	NaN	NaN	NaN	0	2	2
900	'>gi|578811764|ref|XP_006715191.1| PREDICTED: threonylcarbamoyladenosine tRNA methylthiotransferase isoform X2 [Homo sapiens]'	NaN	NaN	NaN	NaN	2	NaN	NaN	NaN	0	2	2
901	'>gi|578813594|ref|XP_006715827.1| PREDICTED: actin, cytoplasmic 1 isoform X1 [Homo sapiens]'	NaN	2	NaN	NaN	NaN	NaN	NaN	NaN	0	2	2
902	'>gi|578819376|ref|XP_006717880.1| PREDICTED: heterogeneous nuclear ribonucleoprotein H3 isoform X9 [Homo sapiens]'	NaN	NaN	NaN	NaN	2	NaN	NaN	NaN	0	2	2
903	'>gi|578827172|ref|XP_006720663.1| PREDICTED: HAUS augmin-like complex subunit 2 isoform X1 [Homo sapiens]'	NaN	NaN	NaN	NaN	NaN	2	NaN	NaN	0	2	2
904	'>gi|578829770|ref|XP_006721537.1| PREDICTED: rho guanine nucleotide exchange factor 15 isoform X3 [Homo sapiens]'	NaN	NaN	NaN	NaN	NaN	NaN	NaN	2	0	2	2
905	'>gi|578836248|ref|XP_006723956.1| PREDICTED: RNA-binding protein 39 isoform X4 [Homo sapiens]'	NaN	NaN	NaN	NaN	2	NaN	NaN	NaN	0	2	2
906	'>gi|5803048|ref|NP_006792.1| ER lumen protein-retaining receptor 1 [Homo sapiens]'	NaN	NaN	NaN	NaN	NaN	NaN	2	NaN	0	2	2
907	'>gi|58761506|ref|NP_001011699.1| HAUS augmin-like complex subunit 8 isoform b [Homo sapiens]'	NaN	NaN	NaN	NaN	2	NaN	NaN	NaN	0	2	2
908	'>gi|5901912|ref|NP_008819.1| calmodulin [Homo sapiens]'	NaN	NaN	NaN	NaN	NaN	2	NaN	NaN	0	2	2
909	'>gi|612407802|ref|NP_001278413.1| carcinoembryonic antigen-related cell adhesion molecule 5 preproprotein [Homo sapiens]'	NaN	NaN	NaN	NaN	NaN	2	NaN	NaN	0	2	2
910	'>gi|618466461|ref|NP_001278590.1| dynein heavy chain 12, axonemal isoform 3 [Homo sapiens]'	NaN	NaN	NaN	NaN	2	NaN	NaN	NaN	0	2	2
911	'>gi|631226406|ref|NP_001278825.1| ras-related protein Rap-1A precursor [Homo sapiens]'	NaN	NaN	NaN	NaN	NaN	2	NaN	NaN	0	2	2
912	'>gi|662236737|ref|NP_001284529.1| hsp70-binding protein 1 isoform 1 [Homo sapiens]'	NaN	NaN	NaN	NaN	2	NaN	NaN	NaN	0	2	2
913	'>gi|663071176|ref|NP_001284694.1| centrin-3 isoform 1 [Homo sapiens]'	NaN	NaN	NaN	NaN	NaN	NaN	2	NaN	0	2	2
914	'>gi|66346695|ref|NP_001990.2| fibrillin-2 precursor [Homo sapiens]'	NaN	2	NaN	NaN	NaN	NaN	NaN	NaN	0	2	2
915	'>gi|667667691|ref|NP_001288092.1| transmembrane protein 209 isoform 2 [Homo sapiens]'	NaN	NaN	NaN	NaN	2	NaN	NaN	NaN	0	2	2
916	'>gi|667667715|ref|NP_001288104.1| ubiquitin carboxyl-terminal hydrolase 30 isoform 2 [Homo sapiens]'	NaN	NaN	NaN	NaN	2	NaN	NaN	NaN	0	2	2
917	'>gi|70167032|ref|NP_056656.2| double-stranded RNA-specific adenosine deaminase isoform c [Homo sapiens]'	NaN	NaN	NaN	2	NaN	NaN	NaN	NaN	0	2	2
918	'>gi|70167113|ref|NP_001020278.1| double-stranded RNA-specific adenosine deaminase isoform d [Homo sapiens]'	NaN	NaN	2	NaN	NaN	NaN	NaN	NaN	0	2	2
919	'>gi|71143156|ref|NP_001025034.1| UPF0669 protein C6orf120 precursor [Homo sapiens]'	NaN	NaN	NaN	NaN	NaN	2	NaN	NaN	0	2	2
920	'>gi|72534712|ref|NP_001026881.1| endoplasmic reticulum-Golgi intermediate compartment protein 1 [Homo sapiens]'	NaN	NaN	NaN	NaN	NaN	2	NaN	NaN	0	2	2
921	'>gi|7657381|ref|NP_055317.1| pre-mRNA-processing factor 19 [Homo sapiens]'	NaN	NaN	NaN	NaN	2	NaN	NaN	NaN	0	2	2
922	'>gi|7657683|ref|NP_055146.1| cystine/glutamate transporter [Homo sapiens]'	NaN	NaN	NaN	NaN	NaN	2	NaN	NaN	0	2	2
923	'>gi|7661592|ref|NP_054753.1| histone chaperone ASF1A [Homo sapiens]'	NaN	NaN	NaN	NaN	NaN	2	NaN	NaN	0	2	2
924	'>gi|7661786|ref|NP_054884.1| NADH dehydrogenase [ubiquinone] 1 alpha subcomplex assembly factor 4 [Homo sapiens]'	NaN	NaN	NaN	NaN	NaN	2	NaN	NaN	0	2	2
925	'>gi|7662276|ref|NP_055534.1| protein FAM115A isoform 1 [Homo sapiens]'	NaN	NaN	NaN	2	NaN	NaN	NaN	NaN	0	2	2
926	'>gi|7706200|ref|NP_057731.1| protein THEM6 precursor [Homo sapiens]'	NaN	NaN	NaN	NaN	NaN	NaN	2	NaN	0	2	2
927	'>gi|7706495|ref|NP_057390.1| dnaJ homolog subfamily B member 11 precursor [Homo sapiens]'	NaN	NaN	NaN	NaN	2	NaN	NaN	NaN	0	2	2
928	'>gi|85068512|ref|NP_599151.2| RISC-loading complex subunit TARBP2 isoform b [Homo sapiens]'	NaN	NaN	NaN	NaN	2	NaN	NaN	NaN	0	2	2
929	'>gi|8922328|ref|NP_060517.1| pre-mRNA-splicing factor RBM22 [Homo sapiens]'	NaN	NaN	NaN	NaN	2	NaN	NaN	NaN	0	2	2
930	'>gi|89886480|ref|NP_001034966.1| striatin-4 isoform 2 [Homo sapiens]'	NaN	NaN	NaN	2	NaN	NaN	NaN	NaN	0	2	2
931	'>gi|92091575|ref|NP_932348.2| coiled-coil domain-containing protein 57 [Homo sapiens]'	NaN	NaN	NaN	2	NaN	NaN	NaN	NaN	0	2	2
932	'>gi|99028881|ref|NP_078902.2| V-set domain-containing T-cell activation inhibitor 1 isoform 1 precursor [Homo sapiens]'	NaN	NaN	NaN	NaN	NaN	2	NaN	NaN	0	2	2
933	'>gi|16507950|ref|NP_055281.2| tektin-2 [Homo sapiens]'	NaN	NaN	NaN	NaN	1	1	1	1	0	1	4
934	'>gi|17921989|ref|NP_005991.1| tubulin alpha-4A chain isoform 1 [Homo sapiens]'	NaN	NaN	1	NaN	1	NaN	1	1	0	1	4
935	'>gi|5174415|ref|NP_006081.1| choline/ethanolaminephosphotransferase 1 [Homo sapiens]'	NaN	NaN	NaN	NaN	1	1	1	NaN	0	1	3
936	'>ETD-N-NSP1'	NaN	NaN	NaN	1	NaN	1	NaN	NaN	0	1	2
937	'>RRV5'	NaN	NaN	NaN	NaN	1	1	NaN	NaN	0	1	2
938	'>gi|13376162|ref|NP_079068.1| protein FAM57A [Homo sapiens]'	NaN	NaN	NaN	NaN	NaN	1	1	NaN	0	1	2
939	'>gi|13904870|ref|NP_001000.2| 40S ribosomal protein S5 [Homo sapiens]'	NaN	NaN	NaN	NaN	NaN	1	1	NaN	0	1	2
940	'>gi|145701015|ref|NP_001077425.1| zinc finger protein 655 isoform f [Homo sapiens]'	NaN	NaN	NaN	1	1	NaN	NaN	NaN	0	1	2
941	'>gi|154759421|ref|NP_001527.3| protein arginine N-methyltransferase 1 isoform 1 [Homo sapiens]'	NaN	NaN	NaN	NaN	1	1	NaN	NaN	0	1	2
942	'>gi|189011550|ref|NP_001120977.1| acid ceramidase isoform c [Homo sapiens]'	NaN	NaN	NaN	NaN	1	1	NaN	NaN	0	1	2
943	'>gi|21464101|ref|NP_036611.2| 14-3-3 protein gamma [Homo sapiens]'	NaN	NaN	NaN	1	NaN	1	NaN	NaN	0	1	2
944	'>gi|223468566|ref|NP_001138617.1| neutral amino acid transporter B(0) isoform 3 [Homo sapiens]'	NaN	NaN	NaN	NaN	NaN	1	1	NaN	0	1	2
945	'>gi|30520329|ref|NP_848934.1| glycerol-3-phosphate acyltransferase 6 [Homo sapiens]'	NaN	NaN	NaN	NaN	1	1	NaN	NaN	0	1	2
946	'>gi|38176283|ref|NP_937886.1| ankyrin repeat and SOCS box protein 7 isoform 2 [Homo sapiens]'	NaN	NaN	NaN	NaN	1	1	NaN	NaN	0	1	2
947	'>gi|392513662|ref|NP_001254738.1| interleukin enhancer-binding factor 2 isoform 2 [Homo sapiens]'	NaN	NaN	NaN	NaN	1	1	NaN	NaN	0	1	2
948	'>gi|4506619|ref|NP_000977.1| 60S ribosomal protein L24 [Homo sapiens]'	1	NaN	NaN	NaN	NaN	1	NaN	NaN	0	1	2
949	'>gi|4557617|ref|NP_000811.1| growth arrest-specific protein 6 precursor [Homo sapiens]'	NaN	NaN	NaN	1	1	NaN	NaN	NaN	0	1	2
950	'>gi|6005884|ref|NP_009038.1| translocon-associated protein subunit gamma [Homo sapiens]'	NaN	NaN	NaN	NaN	NaN	1	1	NaN	0	1	2
951	'>gi|663070994|ref|NP_001284644.1| survival motor neuron protein isoform a [Homo sapiens]'	NaN	NaN	NaN	NaN	1	1	NaN	NaN	0	1	2
952	'>gi|6715607|ref|NP_000175.1| hemoglobin subunit gamma-2 [Homo sapiens]'	1	NaN	NaN	1	NaN	NaN	NaN	NaN	0	1	2
953	'>gi|8923763|ref|NP_060874.1| arf-GAP with dual PH domain-containing protein 2 [Homo sapiens]'	NaN	1	1	NaN	NaN	NaN	NaN	NaN	0	1	2
954	'>NSP1 RRV-5, 501aa'	NaN	NaN	NaN	NaN	1	NaN	NaN	NaN	0	1	1
955	'>RRV-n-NSP1'	1	NaN	NaN	NaN	NaN	NaN	NaN	NaN	0	1	1
956	'>gi|102467481|ref|NP_060421.2| sphingomyelin phosphodiesterase 4 isoform 2 [Homo sapiens]'	NaN	NaN	NaN	1	NaN	NaN	NaN	NaN	0	1	1
957	'>gi|105990541|ref|NP_000341.2| retinal-specific ATP-binding cassette transporter [Homo sapiens]'	NaN	NaN	NaN	NaN	NaN	NaN	NaN	1	0	1	1
958	'>gi|10863927|ref|NP_066953.1| peptidyl-prolyl cis-trans isomerase A isoform 1 [Homo sapiens]'	NaN	NaN	NaN	NaN	NaN	NaN	1	NaN	0	1	1
959	'>gi|10880989|ref|NP_067075.1| ras-related protein Rab-18 isoform 1 [Homo sapiens]'	NaN	NaN	NaN	NaN	NaN	NaN	1	NaN	0	1	1
960	'>gi|109134349|ref|NP_036265.3| coatomer subunit gamma-2 isoform 1 [Homo sapiens]'	NaN	NaN	NaN	1	NaN	NaN	NaN	NaN	0	1	1
961	'>gi|11024700|ref|NP_036590.1| mitochondrial import inner membrane translocase subunit Tim13 [Homo sapiens]'	NaN	NaN	NaN	NaN	NaN	NaN	1	NaN	0	1	1
962	'>gi|110349756|ref|NP_001036013.1| fasciculation and elongation protein zeta-2 isoform 2 [Homo sapiens]'	NaN	NaN	NaN	NaN	1	NaN	NaN	NaN	0	1	1
963	'>gi|110349772|ref|NP_000079.2| collagen alpha-1(I) chain preproprotein [Homo sapiens]'	NaN	NaN	1	NaN	NaN	NaN	NaN	NaN	0	1	1
964	'>gi|110611226|ref|NP_006368.3| protein unc-13 homolog B [Homo sapiens]'	NaN	1	NaN	NaN	NaN	NaN	NaN	NaN	0	1	1
965	'>gi|11128019|ref|NP_061820.1| cytochrome c [Homo sapiens]'	1	NaN	NaN	NaN	NaN	NaN	NaN	NaN	0	1	1
966	'>gi|11141889|ref|NP_068590.1| protein salvador homolog 1 [Homo sapiens]'	NaN	NaN	NaN	NaN	1	NaN	NaN	NaN	0	1	1
967	'>gi|112420968|ref|NP_001036249.1| coiled-coil domain-containing protein 158 [Homo sapiens]'	NaN	NaN	NaN	NaN	NaN	NaN	NaN	1	0	1	1
968	'>gi|115511026|ref|NP_443188.2| acyl-coenzyme A synthetase ACSM1, mitochondrial [Homo sapiens]'	NaN	NaN	1	NaN	NaN	NaN	NaN	NaN	0	1	1
969	'>gi|11641243|ref|NP_071736.1| peptide deformylase, mitochondrial precursor [Homo sapiens]'	NaN	NaN	NaN	NaN	NaN	1	NaN	NaN	0	1	1
970	'>gi|116734710|ref|NP_001080.2| ATP-binding cassette sub-family A member 3 [Homo sapiens]'	NaN	NaN	1	NaN	NaN	NaN	NaN	NaN	0	1	1
971	'>gi|118582269|ref|NP_001071634.1| serine/arginine-rich splicing factor 1 isoform 2 [Homo sapiens]'	NaN	NaN	NaN	NaN	NaN	1	NaN	NaN	0	1	1
972	'>gi|119220552|ref|NP_689957.3| protein sidekick-1 isoform 1 [Homo sapiens]'	NaN	NaN	NaN	NaN	1	NaN	NaN	NaN	0	1	1
973	'>gi|121583483|ref|NP_055855.2| 1-phosphatidylinositol 3-phosphate 5-kinase isoform 2 [Homo sapiens]'	1	NaN	NaN	NaN	NaN	NaN	NaN	NaN	0	1	1
974	'>gi|122937185|ref|NP_001073861.1| protein LCHN [Homo sapiens]'	NaN	NaN	NaN	NaN	1	NaN	NaN	NaN	0	1	1
975	'>gi|12408677|ref|NP_002614.2| prefoldin subunit 4 [Homo sapiens]'	NaN	NaN	NaN	NaN	NaN	NaN	1	NaN	0	1	1
976	'>gi|13124770|ref|NP_076869.1| vitamin K epoxide reductase complex subunit 1 isoform 1 precursor [Homo sapiens]'	NaN	NaN	NaN	NaN	NaN	NaN	1	NaN	0	1	1
977	'>gi|13259508|ref|NP_075408.1| dynactin subunit 1 isoform 2 [Homo sapiens]'	NaN	NaN	1	NaN	NaN	NaN	NaN	NaN	0	1	1
978	'>gi|132626688|ref|NP_055456.2| mediator of DNA damage checkpoint protein 1 [Homo sapiens]'	NaN	1	NaN	NaN	NaN	NaN	NaN	NaN	0	1	1
979	'>gi|13376259|ref|NP_079120.1| nuclear pore complex protein Nup85 [Homo sapiens]'	NaN	NaN	NaN	NaN	1	NaN	NaN	NaN	0	1	1
980	'>gi|13430848|ref|NP_068370.1| nuclear receptor subfamily 1 group D member 1 [Homo sapiens]'	NaN	NaN	NaN	NaN	NaN	1	NaN	NaN	0	1	1
981	'>gi|13435364|ref|NP_077740.1| desmocollin-2 isoform Dsc2a preproprotein [Homo sapiens]'	NaN	NaN	NaN	1	NaN	NaN	NaN	NaN	0	1	1
982	'>gi|14149738|ref|NP_065777.1| neurolysin, mitochondrial [Homo sapiens]'	NaN	NaN	NaN	NaN	1	NaN	NaN	NaN	0	1	1
983	'>gi|14150017|ref|NP_115649.1| transmembrane protein 126A isoform 1 [Homo sapiens]'	NaN	NaN	NaN	NaN	NaN	NaN	1	NaN	0	1	1
984	'>gi|14165466|ref|NP_114368.1| polypyrimidine tract-binding protein 1 isoform c [Homo sapiens]'	NaN	NaN	NaN	NaN	1	NaN	NaN	NaN	0	1	1
985	'>gi|145301567|ref|NP_061981.2| protein SMG9 [Homo sapiens]'	NaN	NaN	NaN	NaN	1	NaN	NaN	NaN	0	1	1
986	'>gi|145301607|ref|NP_001077422.1| thyroid adenoma-associated protein isoform a [Homo sapiens]'	NaN	NaN	1	NaN	NaN	NaN	NaN	NaN	0	1	1
987	'>gi|148536855|ref|NP_001091868.1| coatomer subunit alpha isoform 1 [Homo sapiens]'	NaN	NaN	1	NaN	NaN	NaN	NaN	NaN	0	1	1
988	'>gi|14861834|ref|NP_149061.1| cat eye syndrome critical region protein 5 isoform 2 precursor [Homo sapiens]'	NaN	NaN	NaN	NaN	1	NaN	NaN	NaN	0	1	1
989	'>gi|148727341|ref|NP_009109.3| serine-threonine kinase receptor-associated protein [Homo sapiens]'	NaN	NaN	NaN	NaN	1	NaN	NaN	NaN	0	1	1
990	'>gi|149274653|ref|NP_065831.1| patched domain-containing protein 2 [Homo sapiens]'	NaN	NaN	NaN	1	NaN	NaN	NaN	NaN	0	1	1
991	'>gi|150378539|ref|NP_149015.2| protein piccolo isoform 1 [Homo sapiens]'	NaN	NaN	NaN	NaN	NaN	1	NaN	NaN	0	1	1
992	'>gi|151108473|ref|NP_057152.2| mitochondrial fission 1 protein [Homo sapiens]'	NaN	NaN	NaN	NaN	NaN	NaN	1	NaN	0	1	1
993	'>gi|151301211|ref|NP_758438.2| transcription factor AP-2-delta [Homo sapiens]'	NaN	NaN	NaN	NaN	NaN	NaN	NaN	1	0	1	1
994	'>gi|15208665|ref|NP_150088.1| tripartite motif-containing protein 14 [Homo sapiens]'	NaN	NaN	NaN	NaN	1	NaN	NaN	NaN	0	1	1
995	'>gi|153251745|ref|NP_062457.3| mitochondrial fission regulator 1-like isoform a [Homo sapiens]'	NaN	NaN	NaN	NaN	NaN	1	NaN	NaN	0	1	1
996	'>gi|153252132|ref|NP_001093163.1| 60S ribosomal protein L31 isoform 3 [Homo sapiens]'	NaN	NaN	NaN	NaN	NaN	1	NaN	NaN	0	1	1
997	'>gi|154426292|ref|NP_000688.2| arachidonate 12-lipoxygenase, 12S-type [Homo sapiens]'	NaN	NaN	NaN	NaN	NaN	NaN	NaN	1	0	1	1
998	'>gi|154448892|ref|NP_055839.3| exportin-7 [Homo sapiens]'	NaN	NaN	NaN	1	NaN	NaN	NaN	NaN	0	1	1
999	'>gi|154689847|ref|NP_055619.2| uncharacterized protein KIAA0753 [Homo sapiens]'	NaN	NaN	NaN	NaN	NaN	NaN	NaN	1	0	1	1
1000	'>gi|154689866|ref|NP_001094060.1| uncharacterized protein KIAA0232 [Homo sapiens]'	NaN	NaN	1	NaN	NaN	NaN	NaN	NaN	0	1	1
1001	'>gi|156119605|ref|NP_036336.2| general transcription factor 3C polypeptide 4 [Homo sapiens]'	NaN	NaN	NaN	1	NaN	NaN	NaN	NaN	0	1	1
1002	'>gi|156119615|ref|NP_008832.2| unconventional myosin-IXa [Homo sapiens]'	NaN	1	NaN	NaN	NaN	NaN	NaN	NaN	0	1	1
1003	'>gi|156523268|ref|NP_689506.2| transcriptional adapter 2-beta [Homo sapiens]'	NaN	NaN	NaN	NaN	NaN	1	NaN	NaN	0	1	1
1004	'''>gi|157388997|ref|NP_001098395.1| protein-L-isoaspartate O-methyltransferase domain-containing protein 2 isoform 2 [Homo sapiens...'' <Preview truncated at 128 characters>'	NaN	NaN	NaN	NaN	NaN	1	NaN	NaN	0	1	1
1005	'>gi|157412255|ref|NP_055634.3| E3 ubiquitin-protein ligase Praja-2 [Homo sapiens]'	NaN	NaN	1	NaN	NaN	NaN	NaN	NaN	0	1	1
1006	'>gi|157738667|ref|NP_078789.2| FYVE and coiled-coil domain-containing protein 1 [Homo sapiens]'	NaN	1	NaN	NaN	NaN	NaN	NaN	NaN	0	1	1
1007	'>gi|15812188|ref|NP_208385.1| F-box only protein 3 isoform 2 [Homo sapiens]'	NaN	NaN	NaN	NaN	1	NaN	NaN	NaN	0	1	1
1008	'>gi|160948610|ref|NP_742067.3| E3 ubiquitin-protein ligase UBR3 [Homo sapiens]'	NaN	NaN	NaN	NaN	NaN	NaN	1	NaN	0	1	1
1009	'>gi|16418361|ref|NP_443091.1| protein RFT1 homolog [Homo sapiens]'	NaN	NaN	NaN	NaN	NaN	1	NaN	NaN	0	1	1
1010	'>gi|164419744|ref|NP_619727.2| nuclear factor of activated T-cells 5 isoform b [Homo sapiens]'	NaN	NaN	1	NaN	NaN	NaN	NaN	NaN	0	1	1
1011	'>gi|16445357|ref|NP_439896.1| MFS-type transporter SLC18B1 [Homo sapiens]'	NaN	NaN	NaN	NaN	NaN	1	NaN	NaN	0	1	1
1012	'>gi|16445419|ref|NP_005689.2| secretory carrier-associated membrane protein 3 isoform 1 [Homo sapiens]'	NaN	NaN	NaN	NaN	NaN	1	NaN	NaN	0	1	1
1013	'>gi|164607128|ref|NP_079157.3| solute carrier family 35 member E1 [Homo sapiens]'	NaN	NaN	NaN	NaN	NaN	1	NaN	NaN	0	1	1
1014	'>gi|16554604|ref|NP_057154.2| 28S ribosomal protein S23, mitochondrial [Homo sapiens]'	NaN	NaN	NaN	NaN	NaN	1	NaN	NaN	0	1	1
1015	'>gi|166197683|ref|NP_036400.2| phospholipase D3 [Homo sapiens]'	NaN	NaN	NaN	NaN	1	NaN	NaN	NaN	0	1	1
1016	'>gi|167412124|ref|NP_001107854.1| tuberin isoform 5 [Homo sapiens]'	1	NaN	NaN	NaN	NaN	NaN	NaN	NaN	0	1	1
1017	'>gi|16933537|ref|NP_444504.1| glomulin [Homo sapiens]'	NaN	NaN	NaN	NaN	1	NaN	NaN	NaN	0	1	1
1018	'>gi|171184451|ref|NP_055625.4| centrosome-associated protein 350 [Homo sapiens]'	1	NaN	NaN	NaN	NaN	NaN	NaN	NaN	0	1	1
1019	'>gi|18087855|ref|NP_542408.1| dynein light chain 2, cytoplasmic [Homo sapiens]'	NaN	NaN	NaN	NaN	NaN	NaN	1	NaN	0	1	1
1020	'>gi|191252814|ref|NP_001122107.1| RIMS-binding protein 3B [Homo sapiens]'	NaN	NaN	NaN	NaN	1	NaN	NaN	NaN	0	1	1
1021	'>gi|193083122|ref|NP_001122389.1| mitochondrial import receptor subunit TOM40 homolog [Homo sapiens]'	NaN	NaN	NaN	NaN	NaN	NaN	1	NaN	0	1	1
1022	'>gi|193804923|ref|NP_060485.4| uncharacterized protein CXorf57 isoform 1 [Homo sapiens]'	NaN	NaN	NaN	1	NaN	NaN	NaN	NaN	0	1	1
1023	'>gi|194473657|ref|NP_067056.2| deoxyribonuclease-2-beta isoform 1 precursor [Homo sapiens]'	NaN	NaN	NaN	NaN	1	NaN	NaN	NaN	0	1	1
1024	'>gi|19557636|ref|NP_570981.1| peptidyl-prolyl cis-trans isomerase-like 3 isoform PPIL3b [Homo sapiens]'	NaN	NaN	NaN	NaN	NaN	NaN	1	NaN	0	1	1
1025	'>gi|197304777|ref|NP_001127853.1| TBC1 domain family member 5 isoform a [Homo sapiens]'	NaN	NaN	NaN	1	NaN	NaN	NaN	NaN	0	1	1
1026	'>gi|198041777|ref|NP_001128251.1| importin-11 isoform 1 [Homo sapiens]'	NaN	NaN	NaN	1	NaN	NaN	NaN	NaN	0	1	1
1027	'>gi|19923231|ref|NP_002860.2| ras-related protein Rab-6A isoform a [Homo sapiens]'	NaN	NaN	NaN	NaN	NaN	1	NaN	NaN	0	1	1
1028	'>gi|19923599|ref|NP_079010.2| calmin [Homo sapiens]'	NaN	NaN	1	NaN	NaN	NaN	NaN	NaN	0	1	1
1029	'>gi|205277463|ref|NP_001128527.1| transketolase isoform 1 [Homo sapiens]'	NaN	NaN	NaN	1	NaN	NaN	NaN	NaN	0	1	1
1030	'>gi|208973244|ref|NP_001129174.1| 14-3-3 protein zeta/delta [Homo sapiens]'	NaN	NaN	NaN	NaN	1	NaN	NaN	NaN	0	1	1
1031	'>gi|209869993|ref|NP_001129477.1| trifunctional purine biosynthetic protein adenosine-3 isoform 1 [Homo sapiens]'	NaN	NaN	NaN	1	NaN	NaN	NaN	NaN	0	1	1
1032	'>gi|209969686|ref|NP_001129671.1| GRAM domain-containing protein 1A isoform 2 [Homo sapiens]'	NaN	NaN	NaN	1	NaN	NaN	NaN	NaN	0	1	1
1033	'>gi|209977080|ref|NP_001129695.1| REST corepressor 3 isoform a [Homo sapiens]'	NaN	NaN	NaN	1	NaN	NaN	NaN	NaN	0	1	1
1034	'>gi|21237768|ref|NP_620777.1| MAP kinase-activated protein kinase 5 isoform 2 [Homo sapiens]'	NaN	NaN	NaN	NaN	1	NaN	NaN	NaN	0	1	1
1035	'>gi|21264345|ref|NP_006253.2| peripherin [Homo sapiens]'	NaN	NaN	NaN	NaN	1	NaN	NaN	NaN	0	1	1
1036	'>gi|21359965|ref|NP_110409.2| cleft lip and palate transmembrane protein 1-like protein [Homo sapiens]'	NaN	NaN	NaN	NaN	1	NaN	NaN	NaN	0	1	1
1037	'>gi|21361144|ref|NP_002795.2| 26S protease regulatory subunit 6A [Homo sapiens]'	NaN	NaN	NaN	NaN	1	NaN	NaN	NaN	0	1	1
1038	'>gi|21493022|ref|NP_005091.2| A-kinase anchor protein 12 isoform 1 [Homo sapiens]'	NaN	1	NaN	NaN	NaN	NaN	NaN	NaN	0	1	1
1039	'>gi|215982798|ref|NP_001135970.1| NAD-dependent protein deacetylase sirtuin-1 isoform b [Homo sapiens]'	NaN	NaN	1	NaN	NaN	NaN	NaN	NaN	0	1	1
1040	'>gi|21687102|ref|NP_660304.1| mitochondrial import inner membrane translocase subunit TIM14 isoform 1 [Homo sapiens]'	NaN	NaN	NaN	NaN	NaN	NaN	1	NaN	0	1	1
1041	'>gi|21735575|ref|NP_065698.1| junctophilin-1 [Homo sapiens]'	NaN	NaN	NaN	1	NaN	NaN	NaN	NaN	0	1	1
1042	'>gi|22202633|ref|NP_002615.2| prefoldin subunit 5 isoform alpha [Homo sapiens]'	NaN	NaN	NaN	NaN	NaN	NaN	1	NaN	0	1	1
1043	'>gi|223671915|ref|NP_060859.4| GDP-fucose transporter 1 isoform a [Homo sapiens]'	NaN	NaN	NaN	1	NaN	NaN	NaN	NaN	0	1	1
1044	'>gi|224589127|ref|NP_060596.2| transmembrane protein 33 [Homo sapiens]'	NaN	NaN	NaN	NaN	NaN	NaN	1	NaN	0	1	1
1045	'>gi|224809327|ref|NP_001139247.1| peptidyl-prolyl cis-trans isomerase FKBP5 isoform 1 [Homo sapiens]'	NaN	NaN	NaN	NaN	1	NaN	NaN	NaN	0	1	1
1046	'>gi|22538465|ref|NP_002786.2| proteasome subunit beta type-3 [Homo sapiens]'	NaN	NaN	NaN	NaN	NaN	1	NaN	NaN	0	1	1
1047	'>gi|22538467|ref|NP_002787.2| proteasome subunit beta type-4 [Homo sapiens]'	NaN	NaN	NaN	NaN	NaN	1	NaN	NaN	0	1	1
1048	'>gi|226371754|ref|NP_112593.2| katanin p60 ATPase-containing subunit A-like 2 [Homo sapiens]'	NaN	NaN	NaN	1	NaN	NaN	NaN	NaN	0	1	1
1049	'>gi|22748877|ref|NP_689627.1| class E basic helix-loop-helix protein 22 [Homo sapiens]'	NaN	NaN	NaN	NaN	NaN	1	NaN	NaN	0	1	1
1050	'>gi|229577185|ref|NP_001153441.1| epidermal growth factor receptor substrate 15 isoform B [Homo sapiens]'	NaN	NaN	1	NaN	NaN	NaN	NaN	NaN	0	1	1
1051	'>gi|23308511|ref|NP_694563.1| zinc finger protein 3 homolog [Homo sapiens]'	NaN	1	NaN	NaN	NaN	NaN	NaN	NaN	0	1	1
1052	'>gi|238776833|ref|NP_005773.3| THO complex subunit 4 [Homo sapiens]'	NaN	NaN	NaN	NaN	NaN	1	NaN	NaN	0	1	1
1053	'>gi|24041035|ref|NP_077719.2| neurogenic locus notch homolog protein 2 isoform 1 preproprotein [Homo sapiens]'	NaN	NaN	1	NaN	NaN	NaN	NaN	NaN	0	1	1
1054	'>gi|24430137|ref|NP_006005.2| EKC/KEOPS complex subunit LAGE3 [Homo sapiens]'	NaN	NaN	NaN	NaN	NaN	NaN	1	NaN	0	1	1
1055	'>gi|24431935|ref|NP_065393.1| reticulon-4 isoform A [Homo sapiens]'	NaN	NaN	NaN	NaN	1	NaN	NaN	NaN	0	1	1
1056	'>gi|25121993|ref|NP_733839.1| RNA-binding protein Musashi homolog 2 isoform b [Homo sapiens]'	NaN	NaN	NaN	NaN	NaN	1	NaN	NaN	0	1	1
1057	'>gi|251831112|ref|YP_003024031.1| ATP synthase F0 subunit 6 (mitochondrion) [Homo sapiens]'	NaN	NaN	NaN	NaN	NaN	NaN	1	NaN	0	1	1
1058	'>gi|253970504|ref|NP_001156758.1| RNA-binding protein EWS isoform 4 [Homo sapiens]'	NaN	NaN	NaN	1	NaN	NaN	NaN	NaN	0	1	1
1059	'>gi|256017153|ref|NP_001157743.1| rho GTPase-activating protein 7 isoform 4 [Homo sapiens]'	NaN	NaN	NaN	NaN	NaN	NaN	1	NaN	0	1	1
1060	'>gi|256222415|ref|NP_001157791.1| filamin-B isoform 4 [Homo sapiens]'	NaN	1	NaN	NaN	NaN	NaN	NaN	NaN	0	1	1
1061	'>gi|256223453|ref|NP_009135.4| probable ATP-dependent RNA helicase DDX20 [Homo sapiens]'	NaN	NaN	NaN	1	NaN	NaN	NaN	NaN	0	1	1
1062	'>gi|256985183|ref|NP_066918.2| sodium-dependent multivitamin transporter [Homo sapiens]'	NaN	NaN	NaN	1	NaN	NaN	NaN	NaN	0	1	1
1063	'>gi|257900451|ref|NP_071351.2| piezo-type mechanosensitive ion channel component 2 [Homo sapiens]'	NaN	NaN	NaN	NaN	NaN	1	NaN	NaN	0	1	1
1064	'>gi|260064077|ref|NP_001159399.1| Meckel syndrome type 1 protein isoform 2 [Homo sapiens]'	NaN	NaN	NaN	NaN	1	NaN	NaN	NaN	0	1	1
1065	'>gi|261824035|ref|NP_060285.2| HAUS augmin-like complex subunit 4 isoform 1 [Homo sapiens]'	NaN	NaN	NaN	NaN	NaN	1	NaN	NaN	0	1	1
1066	'>gi|27363461|ref|NP_057153.8| mitochondrial import inner membrane translocase subunit TIM16 [Homo sapiens]'	NaN	NaN	NaN	NaN	NaN	NaN	1	NaN	0	1	1
1067	'>gi|27477111|ref|NP_006416.3| pre-mRNA-splicing factor SLU7 [Homo sapiens]'	NaN	NaN	NaN	1	NaN	NaN	NaN	NaN	0	1	1
1068	'>gi|27545323|ref|NP_078812.2| chondroitin sulfate synthase 2 isoform 1 [Homo sapiens]'	NaN	NaN	NaN	1	NaN	NaN	NaN	NaN	0	1	1
1069	'>gi|281182404|ref|NP_060830.2| gamma-taxilin isoform 1 [Homo sapiens]'	NaN	1	NaN	NaN	NaN	NaN	NaN	NaN	0	1	1
1070	'>gi|283436224|ref|NP_001164007.1| ATPase family AAA domain-containing protein 3A isoform 3 [Homo sapiens]'	1	NaN	NaN	NaN	NaN	NaN	NaN	NaN	0	1	1
1071	'>gi|283806705|ref|NP_001164608.1| spermatid perinuclear RNA-binding protein isoform 2 [Homo sapiens]'	NaN	NaN	NaN	NaN	NaN	1	NaN	NaN	0	1	1
1072	'>gi|283837920|ref|NP_001164641.1| mitochondrial 2-oxodicarboxylate carrier isoform 2 [Homo sapiens]'	NaN	NaN	NaN	NaN	NaN	1	NaN	NaN	0	1	1
1073	'>gi|28933465|ref|NP_803173.1| syntaxin-12 [Homo sapiens]'	NaN	NaN	NaN	NaN	NaN	1	NaN	NaN	0	1	1
1074	'>gi|291219929|ref|NP_001167460.1| rab-like protein 6 isoform 4 [Homo sapiens]'	NaN	1	NaN	NaN	NaN	NaN	NaN	NaN	0	1	1
1075	'>gi|296010852|ref|NP_001171548.1| asparagine synthetase [glutamine-hydrolyzing] isoform c [Homo sapiens]'	NaN	NaN	NaN	NaN	1	NaN	NaN	NaN	0	1	1
1076	'>gi|300388183|ref|NP_001177966.1| 26S proteasome non-ATPase regulatory subunit 1 isoform 2 [Homo sapiens]'	NaN	NaN	NaN	1	NaN	NaN	NaN	NaN	0	1	1
1077	'>gi|301129187|ref|NP_001180304.1| NADH dehydrogenase [ubiquinone] 1 alpha subcomplex subunit 11 isoform 2 [Homo sapiens]'	NaN	NaN	NaN	NaN	NaN	NaN	1	NaN	0	1	1
1078	'>gi|301897469|ref|NP_001967.3| beta-enolase isoform 1 [Homo sapiens]'	1	NaN	NaN	NaN	NaN	NaN	NaN	NaN	0	1	1
1079	'>gi|304766239|ref|NP_776195.2| protein YIPF6 isoform A [Homo sapiens]'	NaN	NaN	NaN	NaN	NaN	NaN	1	NaN	0	1	1
1080	'>gi|30520350|ref|NP_848930.1| ADP-ribosylation factor-like protein 5B [Homo sapiens]'	NaN	NaN	NaN	NaN	NaN	NaN	1	NaN	0	1	1
1081	'>gi|31044432|ref|NP_851853.1| LEM domain-containing protein 2 isoform 1 [Homo sapiens]'	NaN	NaN	NaN	NaN	1	NaN	NaN	NaN	0	1	1
1082	'>gi|310772255|ref|NP_001185585.1| A-kinase anchor protein 2 isoform 3 [Homo sapiens]'	NaN	NaN	1	NaN	NaN	NaN	NaN	NaN	0	1	1
1083	'>gi|311893365|ref|NP_001185798.1| calpain-1 catalytic subunit [Homo sapiens]'	NaN	NaN	NaN	NaN	NaN	NaN	NaN	1	0	1	1
1084	'>gi|313569770|ref|NP_001186270.1| 60S ribosomal protein L17 isoform a [Homo sapiens]'	NaN	NaN	NaN	NaN	NaN	1	NaN	NaN	0	1	1
1085	'>gi|31377705|ref|NP_078824.2| centrosomal protein of 97 kDa [Homo sapiens]'	NaN	NaN	1	NaN	NaN	NaN	NaN	NaN	0	1	1
1086	'>gi|31377722|ref|NP_071404.2| p53 apoptosis effector related to PMP-22 [Homo sapiens]'	NaN	NaN	1	NaN	NaN	NaN	NaN	NaN	0	1	1
1087	'>gi|315360620|ref|NP_001186745.1| gamma-glutamylcyclotransferase isoform 3 [Homo sapiens]'	NaN	NaN	NaN	NaN	NaN	1	NaN	NaN	0	1	1
1088	'>gi|315360622|ref|NP_001186746.1| gamma-glutamylcyclotransferase isoform 4 [Homo sapiens]'	NaN	NaN	NaN	NaN	NaN	NaN	NaN	1	0	1	1
1089	'>gi|31543415|ref|NP_443082.2| growth arrest and DNA damage-inducible proteins-interacting protein 1 [Homo sapiens]'	NaN	NaN	NaN	NaN	NaN	1	NaN	NaN	0	1	1
1090	'>gi|31543630|ref|NP_005406.3| sodium-dependent phosphate transporter 1 [Homo sapiens]'	NaN	NaN	NaN	1	NaN	NaN	NaN	NaN	0	1	1
1091	'>gi|31712030|ref|NP_853553.1| ancient ubiquitous protein 1 [Homo sapiens]'	NaN	NaN	NaN	NaN	1	NaN	NaN	NaN	0	1	1
1092	'>gi|319004144|ref|NP_001188299.1| RING-box protein 2 isoform 4 [Homo sapiens]'	NaN	NaN	NaN	NaN	NaN	NaN	1	NaN	0	1	1
1093	'>gi|32130536|ref|NP_849199.2| CKLF-like MARVEL transmembrane domain-containing protein 8 [Homo sapiens]'	NaN	NaN	NaN	NaN	NaN	NaN	1	NaN	0	1	1
1094	'>gi|321400120|ref|NP_001189477.1| SYNJ2BP-COX16 protein isoform 2 [Homo sapiens]'	NaN	NaN	NaN	NaN	NaN	NaN	1	NaN	0	1	1
1095	'>gi|323668330|ref|NP_001191121.1| tumor protein p73 isoform m [Homo sapiens]'	NaN	NaN	NaN	NaN	1	NaN	NaN	NaN	0	1	1
1096	'>gi|32454741|ref|NP_001226.2| serpin H1 precursor [Homo sapiens]'	NaN	NaN	NaN	NaN	1	NaN	NaN	NaN	0	1	1
1097	'>gi|325121006|ref|NP_001191407.1| uncharacterized protein LOC100533496 [Homo sapiens]'	NaN	NaN	NaN	NaN	NaN	1	NaN	NaN	0	1	1
1098	'>gi|32967597|ref|NP_870986.1| pyruvate kinase PKLR isoform 2 [Homo sapiens]'	NaN	NaN	NaN	NaN	NaN	1	NaN	NaN	0	1	1
1099	'>gi|32967605|ref|NP_872589.1| bromodomain adjacent to zinc finger domain protein 1A isoform b [Homo sapiens]'	NaN	NaN	NaN	NaN	1	NaN	NaN	NaN	0	1	1
1100	'>gi|334688816|ref|NP_001229295.1| proton-coupled folate transporter isoform 2 [Homo sapiens]'	NaN	NaN	NaN	NaN	1	NaN	NaN	NaN	0	1	1
1101	'>gi|33620742|ref|NP_057347.2| fizzy-related protein homolog isoform 2 [Homo sapiens]'	NaN	NaN	NaN	NaN	NaN	NaN	1	NaN	0	1	1
1102	'>gi|33636738|ref|NP_891993.1| cAMP-dependent protein kinase catalytic subunit beta isoform 1 [Homo sapiens]'	NaN	NaN	NaN	NaN	NaN	1	NaN	NaN	0	1	1
1103	'>gi|338968894|ref|NP_001229808.1| elongator complex protein 2 isoform 6 [Homo sapiens]'	NaN	NaN	NaN	1	NaN	NaN	NaN	NaN	0	1	1
1104	'>gi|339275831|ref|NP_001229852.1| eukaryotic translation initiation factor 3 subunit L isoform 2 [Homo sapiens]'	NaN	NaN	NaN	NaN	1	NaN	NaN	NaN	0	1	1
1105	'>gi|34101286|ref|NP_057191.2| zinc finger RNA-binding protein [Homo sapiens]'	NaN	NaN	1	NaN	NaN	NaN	NaN	NaN	0	1	1
1106	'>gi|341926289|ref|NP_001230089.1| TATA box-binding protein-associated factor RNA polymerase I subunit C isoform 6 [Homo sapiens]'	NaN	NaN	NaN	NaN	NaN	1	NaN	NaN	0	1	1
1107	'>gi|342187274|ref|NP_001230111.1| copper-transporting ATPase 2 isoform c [Homo sapiens]'	NaN	NaN	1	NaN	NaN	NaN	NaN	NaN	0	1	1
1108	'>gi|342837704|ref|NP_001230175.1| prolyl 3-hydroxylase 1 isoform 3 precursor [Homo sapiens]'	NaN	NaN	NaN	1	NaN	NaN	NaN	NaN	0	1	1
1109	'>gi|343887344|ref|NP_001230574.1| cofilin-2 isoform 2 [Homo sapiens]'	NaN	NaN	NaN	1	NaN	NaN	NaN	NaN	0	1	1
1110	'>gi|34485722|ref|NP_002258.2| importin subunit alpha-4 [Homo sapiens]'	NaN	NaN	NaN	NaN	1	NaN	NaN	NaN	0	1	1
1111	'>gi|34878735|ref|NP_149438.2| F-box only protein 44 isoform 1 [Homo sapiens]'	NaN	1	NaN	NaN	NaN	NaN	NaN	NaN	0	1	1
1112	'>gi|349732256|ref|NP_001231867.1| thioredoxin isoform 2 [Homo sapiens]'	NaN	NaN	NaN	1	NaN	NaN	NaN	NaN	0	1	1
1113	'''>gi|351542238|ref|NP_001234925.1| arf-GAP with SH3 domain, ANK repeat and PH domain-containing protein 1 isoform 2 [Homo sapiens...'' <Preview truncated at 128 characters>'	NaN	NaN	NaN	NaN	1	NaN	NaN	NaN	0	1	1
1114	'>gi|352962149|ref|NP_001238754.1| transcription factor Sp1 isoform c [Homo sapiens]'	NaN	NaN	NaN	1	NaN	NaN	NaN	NaN	0	1	1
1115	'>gi|357933617|ref|NP_001239546.1| lipocalin-1 isoform 1 precursor [Homo sapiens]'	NaN	1	NaN	NaN	NaN	NaN	NaN	NaN	0	1	1
1116	'>gi|372266129|ref|NP_001243194.1| protein flightless-1 homolog isoform 3 [Homo sapiens]'	NaN	NaN	1	NaN	NaN	NaN	NaN	NaN	0	1	1
1117	'>gi|372266175|ref|NP_001243208.1| zinc finger protein 26 isoform 1 precursor [Homo sapiens]'	NaN	NaN	1	NaN	NaN	NaN	NaN	NaN	0	1	1
1118	'>gi|38027914|ref|NP_937832.1| COP9 signalosome complex subunit 8 isoform 2 [Homo sapiens]'	NaN	NaN	NaN	NaN	NaN	NaN	1	NaN	0	1	1
1119	'>gi|38027923|ref|NP_006828.2| COP9 signalosome complex subunit 5 [Homo sapiens]'	NaN	NaN	NaN	NaN	NaN	1	NaN	NaN	0	1	1
1120	'>gi|38044290|ref|NP_060082.2| zinc finger CCHC domain-containing protein 8 [Homo sapiens]'	NaN	NaN	NaN	1	NaN	NaN	NaN	NaN	0	1	1
1121	'>gi|38455391|ref|NP_006388.2| ribonuclease H2 subunit A [Homo sapiens]'	NaN	NaN	NaN	NaN	NaN	1	NaN	NaN	0	1	1
1122	'>gi|38455402|ref|NP_005555.2| neutrophil gelatinase-associated lipocalin precursor [Homo sapiens]'	NaN	NaN	NaN	1	NaN	NaN	NaN	NaN	0	1	1
1123	'>gi|38488716|ref|NP_060249.2| DEP domain-containing protein 1A isoform b [Homo sapiens]'	NaN	NaN	NaN	NaN	NaN	NaN	1	NaN	0	1	1
1124	'>gi|39930397|ref|NP_065196.1| serine/threonine-protein phosphatase 4 regulatory subunit 3B isoform 2 [Homo sapiens]'	NaN	NaN	NaN	1	NaN	NaN	NaN	NaN	0	1	1
1125	'>gi|39995109|ref|NP_000396.2| ganglioside GM2 activator isoform 1 precursor [Homo sapiens]'	NaN	NaN	NaN	NaN	NaN	1	NaN	NaN	0	1	1
1126	'>gi|40217805|ref|NP_078930.3| polynucleotide 5''-hydroxyl-kinase NOL9 [Homo sapiens]'	NaN	NaN	NaN	1	NaN	NaN	NaN	NaN	0	1	1
1127	'>gi|40217825|ref|NP_115605.2| SLIT and NTRK-like protein 6 precursor [Homo sapiens]'	NaN	1	NaN	NaN	NaN	NaN	NaN	NaN	0	1	1
1128	'>gi|40217847|ref|NP_054733.2| U5 small nuclear ribonucleoprotein 200 kDa helicase [Homo sapiens]'	NaN	1	NaN	NaN	NaN	NaN	NaN	NaN	0	1	1
1129	'>gi|40254851|ref|NP_037487.2| serine/threonine-protein kinase N3 [Homo sapiens]'	NaN	NaN	NaN	1	NaN	NaN	NaN	NaN	0	1	1
1130	'>gi|40789249|ref|NP_060592.2| aspartate--tRNA ligase, mitochondrial [Homo sapiens]'	NaN	NaN	NaN	NaN	1	NaN	NaN	NaN	0	1	1
1131	'>gi|410991931|ref|NP_001258610.1| pyrroline-5-carboxylate reductase 2 isoform 2 [Homo sapiens]'	NaN	NaN	NaN	NaN	NaN	1	NaN	NaN	0	1	1
1132	'>gi|41352721|ref|NP_510968.2| proton-coupled amino acid transporter 1 [Homo sapiens]'	NaN	NaN	NaN	NaN	NaN	1	NaN	NaN	0	1	1
1133	'>gi|414144872|ref|NP_001258664.1| coatomer subunit zeta-1 isoform 3 [Homo sapiens]'	NaN	NaN	NaN	NaN	NaN	NaN	1	NaN	0	1	1
1134	'>gi|422398896|ref|NP_001258717.1| cytoplasmic dynein 1 intermediate chain 2 isoform 3 [Homo sapiens]'	NaN	NaN	NaN	1	NaN	NaN	NaN	NaN	0	1	1
1135	'>gi|42716302|ref|NP_976075.1| CD59 glycoprotein preproprotein [Homo sapiens]'	NaN	NaN	NaN	NaN	NaN	1	NaN	NaN	0	1	1
1136	'>gi|42741684|ref|NP_976225.1| zinc finger Ran-binding domain-containing protein 2 isoform 1 [Homo sapiens]'	1	NaN	NaN	NaN	NaN	NaN	NaN	NaN	0	1	1
1137	'>gi|429836877|ref|NP_001258847.1| signal peptidase complex catalytic subunit SEC11A isoform 5 [Homo sapiens]'	NaN	NaN	NaN	NaN	NaN	NaN	1	NaN	0	1	1
1138	'>gi|4502015|ref|NP_003479.1| A-kinase anchor protein 1, mitochondrial precursor [Homo sapiens]'	NaN	NaN	1	NaN	NaN	NaN	NaN	NaN	0	1	1
1139	'>gi|4502247|ref|NP_001661.1| armadillo repeat protein deleted in velo-cardio-facial syndrome [Homo sapiens]'	NaN	NaN	NaN	1	NaN	NaN	NaN	NaN	0	1	1
1140	'>gi|4503095|ref|NP_001886.1| casein kinase II subunit alpha isoform a [Homo sapiens]'	NaN	NaN	NaN	NaN	1	NaN	NaN	NaN	0	1	1
1141	'>gi|4503253|ref|NP_001335.1| dolichyl-diphosphooligosaccharide--protein glycosyltransferase subunit DAD1 [Homo sapiens]'	NaN	NaN	NaN	NaN	NaN	NaN	1	NaN	0	1	1
1142	'>gi|4503507|ref|NP_001406.1| eukaryotic translation initiation factor 2 subunit 3 [Homo sapiens]'	NaN	NaN	NaN	NaN	1	NaN	NaN	NaN	0	1	1
1143	'>gi|4503515|ref|NP_003747.1| eukaryotic translation initiation factor 3 subunit H [Homo sapiens]'	NaN	NaN	NaN	NaN	1	NaN	NaN	NaN	0	1	1
1144	'>gi|4503727|ref|NP_002004.1| peptidyl-prolyl cis-trans isomerase FKBP3 [Homo sapiens]'	1	NaN	NaN	NaN	NaN	NaN	NaN	NaN	0	1	1
1145	'>gi|4504349|ref|NP_000509.1| hemoglobin subunit beta [Homo sapiens]'	NaN	NaN	NaN	NaN	NaN	NaN	NaN	1	0	1	1
1146	'>gi|4505371|ref|NP_002487.1| NADH dehydrogenase [ubiquinone] iron-sulfur protein 8, mitochondrial precursor [Homo sapiens]'	NaN	NaN	NaN	NaN	NaN	NaN	1	NaN	0	1	1
1147	'>gi|4505813|ref|NP_003737.1| dynein light chain 1, cytoplasmic [Homo sapiens]'	NaN	NaN	NaN	NaN	NaN	1	NaN	NaN	0	1	1
1148	'>gi|4506017|ref|NP_002706.1| serine/threonine-protein phosphatase 2A catalytic subunit alpha isoform [Homo sapiens]'	NaN	NaN	NaN	NaN	1	NaN	NaN	NaN	0	1	1
1149	'>gi|4506163|ref|NP_000012.1| presenilin-1 isoform I-467 [Homo sapiens]'	NaN	NaN	NaN	NaN	NaN	NaN	1	NaN	0	1	1
1150	'>gi|4506179|ref|NP_002777.1| proteasome subunit alpha type-1 isoform 2 [Homo sapiens]'	NaN	NaN	NaN	NaN	NaN	1	NaN	NaN	0	1	1
1151	'>gi|4506181|ref|NP_002778.1| proteasome subunit alpha type-2 [Homo sapiens]'	NaN	NaN	NaN	NaN	NaN	1	NaN	NaN	0	1	1
1152	'>gi|4506193|ref|NP_002784.1| proteasome subunit beta type-1 [Homo sapiens]'	NaN	NaN	NaN	NaN	NaN	1	NaN	NaN	0	1	1
1153	'>gi|4506489|ref|NP_002906.1| replication factor C subunit 3 isoform 1 [Homo sapiens]'	NaN	NaN	NaN	NaN	NaN	1	NaN	NaN	0	1	1
1154	'>gi|4506567|ref|NP_003790.1| mRNA cap guanine-N7 methyltransferase [Homo sapiens]'	NaN	NaN	NaN	NaN	1	NaN	NaN	NaN	0	1	1
1155	'>gi|4506631|ref|NP_000980.1| 60S ribosomal protein L30 [Homo sapiens]'	NaN	NaN	NaN	NaN	NaN	NaN	1	NaN	0	1	1
1156	'>gi|4506643|ref|NP_000989.1| 60S ribosomal protein L37a [Homo sapiens]'	NaN	NaN	NaN	NaN	NaN	NaN	1	NaN	0	1	1
1157	'>gi|4506663|ref|NP_000964.1| 60S ribosomal protein L8 [Homo sapiens]'	NaN	NaN	NaN	NaN	NaN	1	NaN	NaN	0	1	1
1158	'>gi|4506669|ref|NP_000994.1| 60S acidic ribosomal protein P1 isoform 1 [Homo sapiens]'	NaN	NaN	NaN	NaN	NaN	NaN	1	NaN	0	1	1
1159	'>gi|4506715|ref|NP_001022.1| 40S ribosomal protein S28 [Homo sapiens]'	NaN	NaN	NaN	NaN	NaN	NaN	1	NaN	0	1	1
1160	'>gi|4507131|ref|NP_003086.1| small nuclear ribonucleoprotein F [Homo sapiens]'	NaN	NaN	NaN	NaN	NaN	NaN	1	NaN	0	1	1
1161	'>gi|4507149|ref|NP_000445.1| superoxide dismutase [Cu-Zn] [Homo sapiens]'	NaN	NaN	NaN	NaN	NaN	NaN	1	NaN	0	1	1
1162	'>gi|4507217|ref|NP_003124.1| signal recognition particle 9 kDa protein isoform 2 [Homo sapiens]'	NaN	NaN	NaN	NaN	NaN	NaN	1	NaN	0	1	1
1163	'>gi|4507513|ref|NP_000353.1| metalloproteinase inhibitor 3 precursor [Homo sapiens]'	NaN	NaN	NaN	NaN	NaN	1	NaN	NaN	0	1	1
1164	'>gi|4507577|ref|NP_001057.1| tumor necrosis factor receptor superfamily member 1B precursor [Homo sapiens]'	NaN	NaN	1	NaN	NaN	NaN	NaN	NaN	0	1	1
1165	'>gi|4507789|ref|NP_003338.1| ubiquitin-conjugating enzyme E2 L3 isoform 1 [Homo sapiens]'	NaN	NaN	NaN	NaN	1	NaN	NaN	NaN	0	1	1
1166	'>gi|454544715|ref|NP_001263626.1| cellular tumor antigen p53 isoform j [Homo sapiens]'	NaN	NaN	NaN	NaN	NaN	1	NaN	NaN	0	1	1
1167	'>gi|4557727|ref|NP_000228.1| lipoprotein lipase precursor [Homo sapiens]'	NaN	NaN	NaN	NaN	1	NaN	NaN	NaN	0	1	1
1168	'>gi|4557759|ref|NP_000241.1| myeloperoxidase precursor [Homo sapiens]'	NaN	NaN	NaN	1	NaN	NaN	NaN	NaN	0	1	1
1169	'>gi|4557871|ref|NP_001054.1| serotransferrin precursor [Homo sapiens]'	NaN	NaN	1	NaN	NaN	NaN	NaN	NaN	0	1	1
1170	'>gi|45935393|ref|NP_079215.2| epithelial splicing regulatory protein 2 [Homo sapiens]'	NaN	NaN	NaN	1	NaN	NaN	NaN	NaN	0	1	1
1171	'>gi|459642365|ref|NP_001264044.1| dynein heavy chain 11, axonemal [Homo sapiens]'	NaN	NaN	NaN	NaN	NaN	1	NaN	NaN	0	1	1
1172	'>gi|47174859|ref|NP_079334.3| tripartite motif-containing protein 46 isoform 1 [Homo sapiens]'	NaN	NaN	NaN	NaN	NaN	NaN	NaN	1	0	1	1
1173	'>gi|47578099|ref|NP_065184.2| selenoprotein N isoform 1 precursor [Homo sapiens]'	NaN	NaN	NaN	NaN	1	NaN	NaN	NaN	0	1	1
1174	'>gi|4758790|ref|NP_004543.1| NADH dehydrogenase [ubiquinone] iron-sulfur protein 5 [Homo sapiens]'	NaN	NaN	NaN	NaN	NaN	NaN	1	NaN	0	1	1
1175	'>gi|48255947|ref|NP_001001323.1| plasma membrane calcium-transporting ATPase 1 isoform 1a [Homo sapiens]'	NaN	NaN	NaN	1	NaN	NaN	NaN	NaN	0	1	1
1176	'>gi|4826898|ref|NP_005013.1| profilin-1 [Homo sapiens]'	NaN	NaN	NaN	1	NaN	NaN	NaN	NaN	0	1	1
1177	'>gi|485836756|ref|NP_001264890.1| stromal interaction molecule 1 isoform 1 precursor [Homo sapiens]'	NaN	NaN	NaN	1	NaN	NaN	NaN	NaN	0	1	1
1178	'>gi|4885111|ref|NP_005176.1| calmodulin-like protein 3 [Homo sapiens]'	NaN	1	NaN	NaN	NaN	NaN	NaN	NaN	0	1	1
1179	'>gi|4885349|ref|NP_005299.1| G protein-coupled receptor kinase 5 [Homo sapiens]'	NaN	NaN	NaN	NaN	NaN	NaN	NaN	1	0	1	1
1180	'>gi|4885381|ref|NP_005313.1| histone H1.5 [Homo sapiens]'	1	NaN	NaN	NaN	NaN	NaN	NaN	NaN	0	1	1
1181	'>gi|5031611|ref|NP_005859.1| BET1 homolog [Homo sapiens]'	NaN	NaN	NaN	NaN	NaN	NaN	1	NaN	0	1	1
1182	'>gi|5031635|ref|NP_005498.1| cofilin-1 [Homo sapiens]'	NaN	NaN	NaN	NaN	NaN	1	NaN	NaN	0	1	1
1183	'>gi|503774357|ref|NP_001265139.1| nuclear pore complex protein Nup153 isoform 3 [Homo sapiens]'	NaN	NaN	1	NaN	NaN	NaN	NaN	NaN	0	1	1
1184	'>gi|51093861|ref|NP_055365.2| caspase recruitment domain-containing protein 10 [Homo sapiens]'	NaN	NaN	NaN	NaN	NaN	1	NaN	NaN	0	1	1
1185	'>gi|51242955|ref|NP_001003787.1| STE20-related kinase adapter protein alpha isoform 1 [Homo sapiens]'	NaN	NaN	NaN	NaN	1	NaN	NaN	NaN	0	1	1
1186	'>gi|51479129|ref|NP_001003713.1| ATP synthase subunit f, mitochondrial isoform 2b [Homo sapiens]'	NaN	NaN	NaN	NaN	NaN	NaN	1	NaN	0	1	1
1187	'>gi|522020125|ref|NP_001265586.1| polymerase delta-interacting protein 3 isoform 3 [Homo sapiens]'	NaN	NaN	NaN	NaN	1	NaN	NaN	NaN	0	1	1
1188	'>gi|525342616|ref|NP_001266289.1| acyl-protein thioesterase 1 isoform 6 [Homo sapiens]'	NaN	NaN	NaN	NaN	NaN	NaN	1	NaN	0	1	1
1189	'>gi|526118165|ref|NP_001267720.1| surfeit locus protein 4 isoform 4 [Homo sapiens]'	NaN	NaN	NaN	NaN	NaN	1	NaN	NaN	0	1	1
1190	'>gi|530366031|ref|XP_005273106.1| PREDICTED: lysophospholipase-like protein 1 isoform X4 [Homo sapiens]'	NaN	NaN	NaN	NaN	NaN	NaN	1	NaN	0	1	1
1191	'>gi|530382330|ref|XP_005249324.1| PREDICTED: elongation of very long chain fatty acids protein 5 isoform X2 [Homo sapiens]'	NaN	NaN	NaN	NaN	NaN	1	NaN	NaN	0	1	1
1192	'>gi|530387614|ref|XP_005273481.1| PREDICTED: potassium channel subfamily U member 1 isoform X2 [Homo sapiens]'	NaN	1	NaN	NaN	NaN	NaN	NaN	NaN	0	1	1
1193	'>gi|530388934|ref|XP_005250932.1| PREDICTED: E3 SUMO-protein ligase NSE2 isoform X1 [Homo sapiens]'	NaN	NaN	1	NaN	NaN	NaN	NaN	NaN	0	1	1
1194	'>gi|530412751|ref|XP_005257675.1| PREDICTED: signal transducer and activator of transcription 3 isoform X6 [Homo sapiens]'	NaN	NaN	NaN	1	NaN	NaN	NaN	NaN	0	1	1
1195	'>gi|530416098|ref|XP_005258758.1| PREDICTED: hsp70-binding protein 1 isoform X2 [Homo sapiens]'	NaN	NaN	NaN	NaN	NaN	1	NaN	NaN	0	1	1
1196	'>gi|530420021|ref|XP_005261631.1| PREDICTED: small G protein signaling modulator 3 isoform X3 [Homo sapiens]'	NaN	NaN	NaN	1	NaN	NaN	NaN	NaN	0	1	1
1197	'>gi|530422231|ref|XP_005262277.1| PREDICTED: insulin receptor substrate 4 isoform X1 [Homo sapiens]'	NaN	NaN	NaN	NaN	1	NaN	NaN	NaN	0	1	1
1198	'>gi|530426857|ref|XP_005266193.1| PREDICTED: protein transport protein Sec16A isoform X5 [Homo sapiens]'	NaN	1	NaN	NaN	NaN	NaN	NaN	NaN	0	1	1
1199	'>gi|530431101|ref|XP_005277007.1| PREDICTED: protein LSM14 homolog A isoform X3 [Homo sapiens]'	NaN	NaN	NaN	NaN	NaN	1	NaN	NaN	0	1	1
1200	'>gi|531990794|ref|NP_001269086.1| putative tRNA (cytidine(32)/guanosine(34)-2''-O)-methyltransferase isoform c [Homo sapiens]'	NaN	NaN	NaN	NaN	NaN	1	NaN	NaN	0	1	1
1201	'>gi|532524941|ref|NP_001269118.1| UBX domain-containing protein 8 isoform 2 precursor [Homo sapiens]'	NaN	NaN	NaN	NaN	NaN	1	NaN	NaN	0	1	1
1202	'>gi|543583697|ref|NP_001269533.1| prostaglandin E synthase 3 isoform e [Homo sapiens]'	NaN	NaN	NaN	NaN	NaN	NaN	1	NaN	0	1	1
1203	'>gi|544346309|ref|NP_001269656.1| peroxisomal membrane protein PMP34 isoform 3 [Homo sapiens]'	NaN	NaN	NaN	NaN	NaN	1	NaN	NaN	0	1	1
1204	'>gi|5453634|ref|NP_006132.1| cytoplasmic dynein 1 light intermediate chain 2 isoform 1 [Homo sapiens]'	NaN	NaN	NaN	NaN	1	NaN	NaN	NaN	0	1	1
1205	'>gi|5453958|ref|NP_006238.1| serine/threonine-protein phosphatase 5 isoform 1 [Homo sapiens]'	NaN	NaN	NaN	NaN	1	NaN	NaN	NaN	0	1	1
1206	'>gi|5454168|ref|NP_006453.1| ranBP-type and C3HC4-type zinc finger-containing protein 1 isoform 1 [Homo sapiens]'	NaN	NaN	NaN	NaN	1	NaN	NaN	NaN	0	1	1
1207	'>gi|545688925|ref|NP_001269911.1| transducin-like enhancer protein 3 isoform g [Homo sapiens]'	NaN	NaN	NaN	1	NaN	NaN	NaN	NaN	0	1	1
1208	'>gi|546231677|ref|NP_001271188.1| kinesin-like protein KIF20B isoform 1 [Homo sapiens]'	NaN	NaN	NaN	NaN	NaN	NaN	NaN	1	0	1	1
1209	'>gi|54792136|ref|NP_055897.1| follistatin-related protein 4 precursor [Homo sapiens]'	NaN	NaN	NaN	1	NaN	NaN	NaN	NaN	0	1	1
1210	'>gi|54859722|ref|NP_056046.1| nuclear pore complex protein Nup160 [Homo sapiens]'	NaN	NaN	1	NaN	NaN	NaN	NaN	NaN	0	1	1
1211	'>gi|554506556|ref|NP_001272972.1| medium-chain specific acyl-CoA dehydrogenase, mitochondrial isoform d precursor [Homo sapiens]'	NaN	NaN	NaN	NaN	1	NaN	NaN	NaN	0	1	1
1212	'>gi|556503440|ref|NP_001273295.1| MAP7 domain-containing protein 1 isoform 3 [Homo sapiens]'	NaN	NaN	1	NaN	NaN	NaN	NaN	NaN	0	1	1
1213	'>gi|557440899|ref|NP_001273490.1| nuclear mitotic apparatus protein 1 isoform 2 [Homo sapiens]'	NaN	NaN	NaN	NaN	1	NaN	NaN	NaN	0	1	1
1214	'>gi|55749531|ref|NP_006833.2| splicing factor 3B subunit 2 [Homo sapiens]'	NaN	NaN	1	NaN	NaN	NaN	NaN	NaN	0	1	1
1215	'>gi|55749678|ref|NP_079452.3| ninein-like protein [Homo sapiens]'	NaN	NaN	NaN	NaN	NaN	NaN	NaN	1	0	1	1
1216	'>gi|557786188|ref|NP_001273587.1| TBC1 domain family member 4 isoform 2 [Homo sapiens]'	NaN	NaN	1	NaN	NaN	NaN	NaN	NaN	0	1	1
1217	'>gi|56243533|ref|NP_071327.2| stromal cell-derived factor 2-like protein 1 precursor [Homo sapiens]'	NaN	NaN	NaN	NaN	NaN	1	NaN	NaN	0	1	1
1218	'>gi|565324223|ref|NP_001274268.1| calcium-binding protein 39-like [Homo sapiens]'	NaN	NaN	NaN	NaN	NaN	1	NaN	NaN	0	1	1
1219	'>gi|568815719|ref|NP_001275582.1| clathrin heavy chain 1 isoform 2 [Homo sapiens]'	NaN	NaN	1	NaN	NaN	NaN	NaN	NaN	0	1	1
1220	'>gi|570359601|ref|NP_001275668.1| dynamin-1 isoform 4 [Homo sapiens]'	NaN	NaN	NaN	1	NaN	NaN	NaN	NaN	0	1	1
1221	'>gi|574957204|ref|NP_001276334.1| MMS19 nucleotide excision repair protein homolog isoform 1 [Homo sapiens]'	NaN	NaN	NaN	1	NaN	NaN	NaN	NaN	0	1	1
1222	'>gi|57634534|ref|NP_055950.1| nuclear pore complex protein Nup205 [Homo sapiens]'	NaN	NaN	1	NaN	NaN	NaN	NaN	NaN	0	1	1
1223	'>gi|57634536|ref|NP_055970.1| la-related protein 4B [Homo sapiens]'	NaN	NaN	NaN	1	NaN	NaN	NaN	NaN	0	1	1
1224	'>gi|57863259|ref|NP_001008897.1| T-complex protein 1 subunit alpha isoform b [Homo sapiens]'	NaN	NaN	NaN	NaN	1	NaN	NaN	NaN	0	1	1
1225	'>gi|57863298|ref|NP_055811.1| 1-phosphatidylinositol 4,5-bisphosphate phosphodiesterase eta-1 isoform b [Homo sapiens]'	NaN	NaN	1	NaN	NaN	NaN	NaN	NaN	0	1	1
1226	'>gi|578798274|ref|XP_006710371.1| PREDICTED: dnaJ homolog subfamily B member 4 isoform X2 [Homo sapiens]'	NaN	NaN	NaN	NaN	NaN	1	NaN	NaN	0	1	1
1227	'>gi|578800215|ref|XP_006711147.1| PREDICTED: heterogeneous nuclear ribonucleoprotein C-like 1-like [Homo sapiens]'	NaN	NaN	NaN	NaN	1	NaN	NaN	NaN	0	1	1
1228	'>gi|578804333|ref|XP_006712589.1| PREDICTED: low-density lipoprotein receptor-related protein 2 isoform X1 [Homo sapiens]'	NaN	NaN	1	NaN	NaN	NaN	NaN	NaN	0	1	1
1229	'>gi|578806127|ref|XP_006713228.1| PREDICTED: small integral membrane protein 4 isoform X1, partial [Homo sapiens]'	NaN	NaN	NaN	NaN	NaN	NaN	1	NaN	0	1	1
1230	'>gi|578814771|ref|XP_006716244.1| PREDICTED: mitochondrial-processing peptidase subunit beta isoform X4 [Homo sapiens]'	NaN	1	NaN	NaN	NaN	NaN	NaN	NaN	0	1	1
1231	'>gi|578826542|ref|XP_006720432.1| PREDICTED: secretory carrier-associated membrane protein 2 isoform X1 [Homo sapiens]'	NaN	NaN	NaN	NaN	NaN	1	NaN	NaN	0	1	1
1232	'>gi|578829936|ref|XP_006721602.1| PREDICTED: derlin-2 isoform X2 [Homo sapiens]'	NaN	NaN	NaN	NaN	NaN	1	NaN	NaN	0	1	1
1233	'>gi|578836330|ref|XP_006723981.1| PREDICTED: histone H2B type F-S-like [Homo sapiens]'	NaN	NaN	NaN	1	NaN	NaN	NaN	NaN	0	1	1
1234	'>gi|578837067|ref|XP_006724253.1| PREDICTED: RNA binding protein fox-1 homolog 2 isoform X16 [Homo sapiens]'	NaN	NaN	NaN	1	NaN	NaN	NaN	NaN	0	1	1
1235	'''>gi|578839125|ref|XP_006724962.1| PREDICTED: putative V-set and immunoglobulin domain-containing-like protein IGHV4OR15-8-like [...'' <Preview truncated at 128 characters>'	NaN	NaN	NaN	1	NaN	NaN	NaN	NaN	0	1	1
1236	'>gi|578842191|ref|XP_006726110.1| PREDICTED: HLA class I histocompatibility antigen, A-26 alpha chain isoform X2 [Homo sapiens]'	NaN	NaN	NaN	1	NaN	NaN	NaN	NaN	0	1	1
1237	'>gi|5802968|ref|NP_006809.1| protein AF1q [Homo sapiens]'	NaN	NaN	NaN	NaN	NaN	NaN	1	NaN	0	1	1
1238	'>gi|5803040|ref|NP_006849.1| transmembrane emp24 domain-containing protein 1 precursor [Homo sapiens]'	NaN	NaN	NaN	NaN	NaN	1	NaN	NaN	0	1	1
1239	'>gi|5803165|ref|NP_006799.1| protein transport protein Sec61 subunit beta [Homo sapiens]'	NaN	NaN	NaN	NaN	NaN	NaN	1	NaN	0	1	1
1240	'>gi|58331144|ref|NP_787118.2| proline-rich protein 18 [Homo sapiens]'	NaN	NaN	NaN	NaN	NaN	NaN	1	NaN	0	1	1
1241	'>gi|58331268|ref|NP_060139.2| DNA excision repair protein ERCC-6-like [Homo sapiens]'	NaN	NaN	1	NaN	NaN	NaN	NaN	NaN	0	1	1
1242	'>gi|588480511|ref|NP_001277059.1| protein O-linked-mannose beta-1,2-N-acetylglucosaminyltransferase 1 isoform 4 [Homo sapiens]'	NaN	NaN	NaN	NaN	1	NaN	NaN	NaN	0	1	1
1243	'>gi|589269125|ref|NP_001277141.1| tetraspanin-10 isoform a [Homo sapiens]'	NaN	NaN	NaN	1	NaN	NaN	NaN	NaN	0	1	1
1244	'>gi|5902054|ref|NP_008844.1| E3 ubiquitin-protein ligase RNF5 [Homo sapiens]'	NaN	NaN	NaN	NaN	NaN	NaN	1	NaN	0	1	1
1245	'>gi|5902064|ref|NP_008918.1| rab effector Noc2 isoform 1 [Homo sapiens]'	NaN	NaN	1	NaN	NaN	NaN	NaN	NaN	0	1	1
1246	'>gi|597709787|ref|NP_001278017.1| WD repeat-containing protein 87 isoform 1 [Homo sapiens]'	NaN	NaN	NaN	NaN	1	NaN	NaN	NaN	0	1	1
1247	'>gi|614458181|ref|NP_001092007.2| patatin-like phospholipase domain-containing protein 7 isoform a [Homo sapiens]'	NaN	NaN	NaN	NaN	1	NaN	NaN	NaN	0	1	1
1248	'>gi|614458217|ref|NP_997244.4| FRAS1-related extracellular matrix protein 2 precursor [Homo sapiens]'	NaN	1	NaN	NaN	NaN	NaN	NaN	NaN	0	1	1
1249	'>gi|61743916|ref|NP_057436.2| carboxypeptidase A4 preproprotein [Homo sapiens]'	NaN	NaN	NaN	NaN	NaN	1	NaN	NaN	0	1	1
1250	'>gi|618468299|ref|NP_001278532.1| dynein light chain Tctex-type 1 isoform 3 [Homo sapiens]'	NaN	NaN	NaN	NaN	NaN	NaN	1	NaN	0	1	1
1251	'>gi|62530384|ref|NP_001910.2| enoyl-CoA delta isomerase 1, mitochondrial isoform 1 precursor [Homo sapiens]'	NaN	NaN	NaN	NaN	NaN	1	NaN	NaN	0	1	1
1252	'>gi|62955829|ref|NP_219500.1| transmembrane protein 261 [Homo sapiens]'	NaN	NaN	NaN	NaN	NaN	NaN	1	NaN	0	1	1
1253	'>gi|63252886|ref|NP_000908.2| prolyl 4-hydroxylase subunit alpha-1 isoform 1 precursor [Homo sapiens]'	NaN	NaN	NaN	NaN	1	NaN	NaN	NaN	0	1	1
1254	'>gi|632794837|ref|NP_001278845.1| small nuclear ribonucleoprotein Sm D1 isoform 2 [Homo sapiens]'	NaN	NaN	NaN	NaN	NaN	NaN	1	NaN	0	1	1
1255	'>gi|661902998|ref|NP_001284347.1| heterogeneous nuclear ribonucleoprotein M isoform c [Homo sapiens]'	NaN	NaN	NaN	NaN	NaN	1	NaN	NaN	0	1	1
1256	'>gi|664806009|ref|NP_001287745.1| zinc finger CCHC domain-containing protein 10 isoform 1 [Homo sapiens]'	1	NaN	NaN	NaN	NaN	NaN	NaN	NaN	0	1	1
1257	'''>gi|665821217|ref|NP_001287921.1| eukaryotic translation initiation factor 3 subunit K {ECO:0000255|HAMAP-Rule:MF_03010} isoform...'' <Preview truncated at 128 characters>'	NaN	NaN	NaN	NaN	NaN	1	NaN	NaN	0	1	1
1258	'>gi|666638015|ref|NP_001287997.1| ADP-ribosylation factor-like protein 1 isoform 2 [Homo sapiens]'	NaN	NaN	NaN	NaN	NaN	1	NaN	NaN	0	1	1
1259	'>gi|66773040|ref|NP_982278.3| presqualene diphosphate phosphatase [Homo sapiens]'	NaN	NaN	NaN	NaN	NaN	1	NaN	NaN	0	1	1
1260	'>gi|66933016|ref|NP_000875.2| inosine-5''-monophosphate dehydrogenase 2 [Homo sapiens]'	NaN	NaN	NaN	NaN	NaN	NaN	1	NaN	0	1	1
1261	'>gi|67782311|ref|NP_008860.4| helicase SKI2W [Homo sapiens]'	NaN	NaN	1	NaN	NaN	NaN	NaN	NaN	0	1	1
1262	'>gi|7019471|ref|NP_037380.1| NTF2-related export protein 1 [Homo sapiens]'	NaN	NaN	NaN	NaN	NaN	NaN	1	NaN	0	1	1
1263	'>gi|73623035|ref|NP_006452.3| sperm-associated antigen 5 [Homo sapiens]'	NaN	NaN	1	NaN	NaN	NaN	NaN	NaN	0	1	1
1264	'>gi|73747915|ref|NP_000535.3| antigen peptide transporter 2 isoform 1 [Homo sapiens]'	NaN	NaN	NaN	NaN	1	NaN	NaN	NaN	0	1	1
1265	'>gi|7661708|ref|NP_054772.1| feline leukemia virus subgroup C receptor-related protein 1 [Homo sapiens]'	NaN	NaN	NaN	NaN	1	NaN	NaN	NaN	0	1	1
1266	'>gi|7705421|ref|NP_057455.1| 3-keto-steroid reductase [Homo sapiens]'	NaN	NaN	NaN	NaN	NaN	1	NaN	NaN	0	1	1
1267	'>gi|7705748|ref|NP_057062.1| serine/threonine-protein kinase TNNI3K [Homo sapiens]'	NaN	1	NaN	NaN	NaN	NaN	NaN	NaN	0	1	1
1268	'>gi|7705893|ref|NP_057305.1| dynactin subunit 4 isoform b [Homo sapiens]'	NaN	NaN	NaN	NaN	1	NaN	NaN	NaN	0	1	1
1269	'>gi|7706254|ref|NP_057018.1| nucleolar protein 58 [Homo sapiens]'	NaN	NaN	NaN	NaN	1	NaN	NaN	NaN	0	1	1
1270	'>gi|7706351|ref|NP_057161.1| peptidyl-tRNA hydrolase 2, mitochondrial precursor [Homo sapiens]'	NaN	NaN	NaN	NaN	NaN	NaN	1	NaN	0	1	1
1271	'>gi|7770075|ref|NP_054702.1| protachykinin-1 isoform alpha precursor [Homo sapiens]'	NaN	NaN	NaN	NaN	NaN	NaN	1	NaN	0	1	1
1272	'>gi|83715985|ref|NP_001032900.1| 3-hydroxyacyl-CoA dehydrogenase type-2 isoform 2 [Homo sapiens]'	NaN	NaN	NaN	NaN	NaN	1	NaN	NaN	0	1	1
1273	'>gi|83921614|ref|NP_085056.2| cytochrome b5 type B [Homo sapiens]'	NaN	NaN	NaN	NaN	NaN	1	NaN	NaN	0	1	1
1274	'>gi|88759337|ref|NP_060536.3| GPN-loop GTPase 2 [Homo sapiens]'	NaN	NaN	NaN	NaN	NaN	1	NaN	NaN	0	1	1
1275	'>gi|8922944|ref|NP_060832.1| protein lin-7 homolog C [Homo sapiens]'	NaN	NaN	NaN	NaN	NaN	1	NaN	NaN	0	1	1
1276	'>gi|8923460|ref|NP_060316.1| tRNA selenocysteine 1-associated protein 1 [Homo sapiens]'	NaN	NaN	NaN	NaN	1	NaN	NaN	NaN	0	1	1
1277	'>gi|8923532|ref|NP_060352.1| ceroid-lipofuscinosis neuronal protein 6 [Homo sapiens]'	NaN	NaN	NaN	NaN	NaN	1	NaN	NaN	0	1	1
1278	'>gi|89353281|ref|NP_001034796.1| serologically defined colon cancer antigen 3 isoform 1 [Homo sapiens]'	NaN	NaN	NaN	NaN	1	NaN	NaN	NaN	0	1	1
1279	'>gi|95113664|ref|NP_060684.4| leucine-rich repeat-containing protein 1 [Homo sapiens]'	NaN	NaN	NaN	NaN	1	NaN	NaN	NaN	0	1	1
1280	'>gi|96975097|ref|NP_057661.3| ras-related protein Rab-6B [Homo sapiens]'	NaN	NaN	NaN	NaN	NaN	NaN	1	NaN	0	1	1
1281	'>gi|98986464|ref|NP_006818.3| transmembrane emp24 domain-containing protein 10 precursor [Homo sapiens]'	NaN	NaN	NaN	NaN	NaN	NaN	1	NaN	0	1	1
1282	'>gi|9955963|ref|NP_005680.1| ATP-binding cassette sub-family B member 6, mitochondrial [Homo sapiens]'	NaN	NaN	NaN	NaN	1	NaN	NaN	NaN	0	1	1
1283	'>gi|119395750|ref|NP_006112.3| keratin, type II cytoskeletal 1 [Homo sapiens]'	290	215	371	295	297	350	190	189	1	371	2197
1284	'>gi|55956899|ref|NP_000217.2| keratin, type I cytoskeletal 9 [Homo sapiens]'	209	164	268	248	240	225	193	269	1	269	1816
1285	'>gi|47132620|ref|NP_000414.2| keratin, type II cytoskeletal 2 epidermal [Homo sapiens]'	3	115	204	177	129	189	75	99	1	204	991
1286	'>sp|K22E_HUMAN|(Common contaminant protein)'	140	1	1	1	2	1	NaN	1	1	140	147
1287	'>gi|195972866|ref|NP_000412.3| keratin, type I cytoskeletal 10 [Homo sapiens]'	1	NaN	103	99	91	107	NaN	138	1	138	539
1288	'>gi|24430192|ref|NP_005548.2| keratin, type I cytoskeletal 16 [Homo sapiens]'	10	22	13	19	14	133	6	5	1	133	222
1289	'>sp|ALBU_BOVIN|(Common contaminant protein)'	17	20	110	26	40	19	11	5	1	110	248
1290	'>sp|K1C10_HUMAN|(Common contaminant protein)'	105	NaN	1	NaN	4	NaN	66	NaN	1	105	176
1291	'>gi|530412176|ref|XP_005257400.1| PREDICTED: keratin, type I cytoskeletal 10 isoform X1 [Homo sapiens]'	NaN	103	NaN	NaN	NaN	NaN	1	NaN	1	103	104
1292	'>gi|119395754|ref|NP_000415.2| keratin, type II cytoskeletal 5 [Homo sapiens]'	49	46	49	52	53	75	35	36	1	75	395
1293	'>sp|TRYP_PIG|(Common contaminant protein)'	54	64	55	54	47	49	57	52	1	64	432
1294	'>gi|15431310|ref|NP_000517.2| keratin, type I cytoskeletal 14 [Homo sapiens]'	33	41	39	44	39	59	28	41	1	59	324
1295	'>gi|194018511|ref|NP_778253.2| keratin, type II cytoskeletal 1b [Homo sapiens]'	5	9	14	12	NaN	46	4	8	1	46	98
1296	'>gi|5031839|ref|NP_005545.1| keratin, type II cytoskeletal 6A [Homo sapiens]'	NaN	2	20	1	16	40	NaN	4	1	40	83
1297	'>gi|119703753|ref|NP_005546.2| keratin, type II cytoskeletal 6B [Homo sapiens]'	8	18	1	29	NaN	7	13	2	1	29	78
1298	'>gi|4557701|ref|NP_000413.1| keratin, type I cytoskeletal 17 [Homo sapiens]'	2	11	5	11	1	28	NaN	NaN	1	28	58
1299	'>Reverse >gi|339275831|ref|NP_001229852.1| eukaryotic translation initiation factor 3 subunit L isoform 2 [Homo sapiens]'	3	NaN	25	NaN	NaN	NaN	NaN	NaN	1	25	28
1300	'>sp|ALBU_HUMAN|(Common contaminant protein)'	NaN	NaN	8	16	NaN	12	NaN	NaN	1	16	36
1301	'>Reverse >gi|578794903|ref|XP_006710210.1| PREDICTED: Sjoegren syndrome nuclear autoantigen 1 homolog [Homo sapiens]'	2	NaN	15	NaN	NaN	2	NaN	NaN	1	15	19
1302	'''>Reverse >gi|578837252|ref|XP_006724323.1| PREDICTED: eukaryotic translation initiation factor 3 subunit L isoform X2 [Homo sapi...'' <Preview truncated at 128 characters>'	NaN	15	NaN	NaN	NaN	NaN	NaN	NaN	1	15	15
1303	'>gi|4504919|ref|NP_002264.1| keratin, type II cytoskeletal 8 isoform 2 [Homo sapiens]'	NaN	NaN	1	NaN	14	1	NaN	NaN	1	14	16
1304	'>gi|24234699|ref|NP_002267.2| keratin, type I cytoskeletal 19 [Homo sapiens]'	NaN	1	NaN	NaN	8	13	NaN	NaN	1	13	22
1305	'>gi|89357932|ref|NP_775487.2| keratin, type II cytoskeletal 78 isoform 1 [Homo sapiens]'	9	8	8	6	4	12	1	8	1	12	56
1306	'>gi|15618995|ref|NP_258259.1| keratin, type II cytoskeletal 71 [Homo sapiens]'	NaN	11	NaN	NaN	NaN	2	3	3	1	11	19
1307	'>gi|1373325|gb|AAB08064.1| Enhanced Green Fluorescent Protein [Cloning vector pEGFP-N3](Common contaminant protein)'	NaN	NaN	NaN	10	3	4	NaN	NaN	1	10	17
1308	'>Reverse >gi|45446749|ref|NP_004975.2| kinesin heavy chain isoform 5A [Homo sapiens]'	NaN	NaN	NaN	NaN	NaN	10	NaN	NaN	1	10	10
1309	'>gi|331999954|ref|NP_002263.3| keratin, type II cytoskeletal 4 [Homo sapiens]'	NaN	NaN	NaN	NaN	NaN	8	NaN	1	1	8	9
1310	'>gi|40354195|ref|NP_954657.1| keratin, type I cytoskeletal 18 [Homo sapiens]'	NaN	NaN	NaN	NaN	8	NaN	NaN	NaN	1	8	8
1311	'>gi|153945736|ref|NP_853515.2| keratin, type I cytoskeletal 27 [Homo sapiens]'	NaN	7	NaN	NaN	NaN	4	3	NaN	1	7	14
1312	'>Reverse >gi|378925625|ref|NP_001243779.1| titin isoform N2BA [Homo sapiens]'	7	NaN	NaN	NaN	NaN	NaN	NaN	NaN	1	7	7
1313	'>gi|125628636|ref|NP_872313.2| keratin, type II cytoskeletal 80 isoform K80 [Homo sapiens]'	NaN	3	3	6	1	5	3	4	1	6	25
1314	'>gi|153791670|ref|NP_056932.2| keratin, type II cytoskeletal 2 oral [Homo sapiens]'	NaN	6	NaN	NaN	NaN	NaN	NaN	NaN	1	6	6
1315	'>gi|28372503|ref|NP_542785.1| keratin, type II cytoskeletal 72 isoform 1 [Homo sapiens]'	NaN	5	4	2	1	2	1	1	1	5	16
1316	'>gi|27894339|ref|NP_056330.3| keratin, type I cytoskeletal 23 isoform 1 [Homo sapiens]'	NaN	2	NaN	NaN	NaN	5	NaN	NaN	1	5	7
1317	'>Reverse >gi|4507987|ref|NP_003428.1| zinc finger protein 136 [Homo sapiens]'	NaN	NaN	NaN	NaN	NaN	NaN	NaN	5	1	5	5
1318	'>Reverse >gi|530416814|ref|XP_005259103.1| PREDICTED: putative L-aspartate dehydrogenase isoform X2 [Homo sapiens]'	5	NaN	NaN	NaN	NaN	NaN	NaN	NaN	1	5	5
1319	'>Reverse >gi|154240671|ref|NP_775760.3| maestro heat-like repeat-containing protein family member 2B [Homo sapiens]'	NaN	3	1	2	4	1	2	4	1	4	17
1320	'>gi|109148552|ref|NP_476429.2| keratin, type II cytoskeletal 3 [Homo sapiens]'	3	3	4	1	NaN	3	1	NaN	1	4	15
1321	'>sp|CAS1_BOVIN|(Common contaminant protein)'	1	1	1	1	1	4	2	1	1	4	12
1322	'>Reverse >gi|55956899|ref|NP_000217.2| keratin, type I cytoskeletal 9 [Homo sapiens]'	NaN	NaN	3	3	NaN	1	4	NaN	1	4	11
1323	'>Reverse >gi|322302755|ref|NP_001189788.1| SHC-transforming protein 1 isoform 5 precursor [Homo sapiens]'	NaN	NaN	NaN	NaN	NaN	2	3	4	1	4	9
1324	'>gi|28173564|ref|NP_778238.1| keratin, type II cytoskeletal 73 [Homo sapiens]'	NaN	3	NaN	NaN	1	4	NaN	NaN	1	4	8
1325	'>Reverse >gi|21361834|ref|NP_065105.2| solute carrier family 22 member 17 isoform a [Homo sapiens]'	NaN	NaN	NaN	NaN	4	NaN	NaN	NaN	1	4	4
1326	'>Reverse >gi|578794661|ref|XP_006710191.1| PREDICTED: uncharacterized protein LOC102725453 [Homo sapiens]'	NaN	NaN	NaN	4	NaN	NaN	NaN	NaN	1	4	4
1327	'>Reverse >gi|661902998|ref|NP_001284347.1| heterogeneous nuclear ribonucleoprotein M isoform c [Homo sapiens]'	NaN	NaN	NaN	NaN	NaN	NaN	NaN	4	1	4	4
1328	'>Reverse >gi|46560555|ref|NP_997196.1| transmembrane protein 132E precursor [Homo sapiens]'	3	2	1	1	NaN	1	2	1	1	3	11
1329	'>Reverse >gi|134133240|ref|NP_115527.3| pterin-4-alpha-carbinolamine dehydratase 2 [Homo sapiens]'	NaN	NaN	NaN	NaN	NaN	NaN	3	NaN	1	3	3
1330	'>Reverse >gi|14043072|ref|NP_112533.1| heterogeneous nuclear ribonucleoproteins A2/B1 isoform B1 [Homo sapiens]'	3	NaN	NaN	NaN	NaN	NaN	NaN	NaN	1	3	3
1331	'>Reverse >gi|167614485|ref|NP_006102.2| 3-ketoacyl-CoA thiolase, mitochondrial [Homo sapiens]'	NaN	NaN	NaN	NaN	NaN	NaN	3	NaN	1	3	3
1332	'>Reverse >gi|530406610|ref|XP_005254804.1| PREDICTED: probable E3 ubiquitin-protein ligase HERC1 isoform X6 [Homo sapiens]'	NaN	NaN	NaN	3	NaN	NaN	NaN	NaN	1	3	3
1333	'>Reverse >gi|73623035|ref|NP_006452.3| sperm-associated antigen 5 [Homo sapiens]'	3	NaN	NaN	NaN	NaN	NaN	NaN	NaN	1	3	3
1334	'>gi|254675185|ref|NP_853517.2| keratin, type I cytoskeletal 26 [Homo sapiens]'	NaN	3	NaN	NaN	NaN	NaN	NaN	NaN	1	3	3
1335	'>Reverse >gi|122939159|ref|NP_031391.2| protein-arginine deiminase type-2 [Homo sapiens]'	2	2	NaN	NaN	NaN	2	1	NaN	1	2	7
1336	'>gi|155969697|ref|NP_775109.2| keratin, type II cytoskeletal 6C [Homo sapiens]'	2	2	NaN	1	NaN	NaN	NaN	NaN	1	2	5
1337	'>sp|K1C15_SHEEP|(Common contaminant protein)'	NaN	2	NaN	2	NaN	NaN	1	NaN	1	2	5
1338	'>Reverse >gi|11761619|ref|NP_037466.2| mannose-1-phosphate guanyltransferase beta isoform 1 [Homo sapiens]'	NaN	NaN	NaN	NaN	2	NaN	NaN	2	1	2	4
1339	'>Reverse >gi|311771714|ref|NP_001185730.1| eukaryotic translation initiation factor 4 gamma 3 isoform 1 [Homo sapiens]'	1	NaN	NaN	NaN	NaN	NaN	1	2	1	2	4
1340	'>Reverse >gi|39780588|ref|NP_060598.3| pre-rRNA-processing protein TSR1 homolog [Homo sapiens]'	NaN	NaN	2	NaN	NaN	2	NaN	NaN	1	2	4
1341	'>Reverse >gi|147904340|ref|NP_079498.2| WD repeat-containing protein 82 [Homo sapiens]'	NaN	NaN	NaN	1	2	NaN	NaN	NaN	1	2	3
1342	'>Reverse >gi|32261320|ref|NP_037422.2| homologous-pairing protein 2 homolog isoform 1 [Homo sapiens]'	1	NaN	NaN	NaN	NaN	NaN	NaN	2	1	2	3
1343	'>Reverse >gi|50312655|ref|NP_149099.2| heat shock transcription factor, Y-linked isoform 1 [Homo sapiens]'	1	NaN	NaN	2	NaN	NaN	NaN	NaN	1	2	3
1344	'>gi|114431246|ref|NP_853513.2| keratin, type I cytoskeletal 28 [Homo sapiens]'	NaN	2	NaN	NaN	NaN	NaN	NaN	1	1	2	3
1345	'>gi|148612803|ref|NP_778223.2| keratin, type II cytoskeletal 74 [Homo sapiens]'	1	2	NaN	NaN	NaN	NaN	NaN	NaN	1	2	3
1346	'>gi|32567786|ref|NP_787028.1| keratin, type II cytoskeletal 79 [Homo sapiens]'	NaN	1	2	NaN	NaN	NaN	NaN	NaN	1	2	3
1347	'>Reverse >gi|114796644|ref|NP_001041659.1| regulator of chromosome condensation isoform a [Homo sapiens]'	NaN	2	NaN	NaN	NaN	NaN	NaN	NaN	1	2	2
1348	'>Reverse >gi|145312241|ref|NP_071330.3| differentially expressed in FDCP 6 homolog [Homo sapiens]'	NaN	NaN	NaN	NaN	NaN	2	NaN	NaN	1	2	2
1349	'>Reverse >gi|156616290|ref|NP_001096078.1| collagen alpha-6(VI) chain precursor [Homo sapiens]'	NaN	NaN	NaN	2	NaN	NaN	NaN	NaN	1	2	2
1350	'>Reverse >gi|167466272|ref|NP_689728.3| cytoskeleton-associated protein 2-like [Homo sapiens]'	NaN	NaN	NaN	NaN	2	NaN	NaN	NaN	1	2	2
1351	'>Reverse >gi|168823443|ref|NP_055921.2| helicase ARIP4 [Homo sapiens]'	NaN	NaN	NaN	2	NaN	NaN	NaN	NaN	1	2	2
1352	'>Reverse >gi|222537752|ref|NP_064594.3| SH2 domain-containing adapter protein D [Homo sapiens]'	NaN	NaN	NaN	NaN	NaN	NaN	2	NaN	1	2	2
1353	'>Reverse >gi|282165810|ref|NP_001163887.1| tight junction protein ZO-2 isoform 3 [Homo sapiens]'	NaN	NaN	NaN	NaN	NaN	NaN	2	NaN	1	2	2
1354	'''>Reverse >gi|295821183|ref|NP_001171475.1| propionyl-CoA carboxylase alpha chain, mitochondrial isoform c precursor [Homo sapien...'' <Preview truncated at 128 characters>'	NaN	NaN	NaN	NaN	2	NaN	NaN	NaN	1	2	2
1355	'>Reverse >gi|34452684|ref|NP_057204.2| E3 ubiquitin-protein ligase RLIM [Homo sapiens]'	2	NaN	NaN	NaN	NaN	NaN	NaN	NaN	1	2	2
1356	'>Reverse >gi|375151585|ref|NP_001243502.1| neuronal acetylcholine receptor subunit alpha-4 isoform 2 [Homo sapiens]'	NaN	NaN	2	NaN	NaN	NaN	NaN	NaN	1	2	2
1357	'>Reverse >gi|40805823|ref|NP_690848.1| collagen alpha-1(XXII) chain precursor [Homo sapiens]'	NaN	NaN	NaN	2	NaN	NaN	NaN	NaN	1	2	2
1358	'>Reverse >gi|4501945|ref|NP_001115.1| ADM precursor [Homo sapiens]'	NaN	NaN	NaN	NaN	NaN	NaN	2	NaN	1	2	2
1359	'>Reverse >gi|4504403|ref|NP_002111.1| HLA class II histocompatibility antigen, DO beta chain precursor [Homo sapiens]'	NaN	NaN	2	NaN	NaN	NaN	NaN	NaN	1	2	2
1360	'>Reverse >gi|4504615|ref|NP_000587.1| insulin-like growth factor-binding protein 1 precursor [Homo sapiens]'	NaN	2	NaN	NaN	NaN	NaN	NaN	NaN	1	2	2
1361	'>Reverse >gi|4505379|ref|NP_003195.1| nuclear factor erythroid 2-related factor 1 [Homo sapiens]'	NaN	NaN	NaN	NaN	NaN	NaN	NaN	2	1	2	2
1362	'>Reverse >gi|45827701|ref|NP_005119.2| protein dopey-2 [Homo sapiens]'	NaN	NaN	2	NaN	NaN	NaN	NaN	NaN	1	2	2
1363	'>Reverse >gi|533112494|ref|NP_775871.2| mucin-19 precursor [Homo sapiens]'	NaN	2	NaN	NaN	NaN	NaN	NaN	NaN	1	2	2
1364	'>Reverse >gi|55749544|ref|NP_055446.2| SH3 and PX domain-containing protein 2A [Homo sapiens]'	NaN	NaN	NaN	NaN	NaN	NaN	2	NaN	1	2	2
1365	'>Reverse >gi|578836248|ref|XP_006723956.1| PREDICTED: RNA-binding protein 39 isoform X4 [Homo sapiens]'	2	NaN	NaN	NaN	NaN	NaN	NaN	NaN	1	2	2
1366	'>Reverse >gi|590121974|ref|NP_001277192.1| dedicator of cytokinesis protein 10 DOCK10.2 [Homo sapiens]'	NaN	NaN	NaN	NaN	NaN	2	NaN	NaN	1	2	2
1367	'>Reverse >gi|62988361|ref|NP_001615.1| absent in melanoma 1 protein [Homo sapiens]'	NaN	NaN	NaN	NaN	NaN	NaN	NaN	2	1	2	2
1368	'>Reverse >gi|63252863|ref|NP_115820.2| structure-specific endonuclease subunit SLX4 [Homo sapiens]'	NaN	NaN	NaN	NaN	NaN	NaN	2	NaN	1	2	2
1369	'>gi|131412225|ref|NP_705694.2| keratin, type I cytoskeletal 13 isoform a [Homo sapiens]'	NaN	NaN	NaN	NaN	NaN	2	NaN	NaN	1	2	2
1370	'>gi|31559829|ref|NP_853512.1| keratin, type I cytoskeletal 25 [Homo sapiens]'	NaN	2	NaN	NaN	NaN	NaN	NaN	NaN	1	2	2
1371	'>sp|CASB_BOVIN|(Common contaminant protein)'	1	1	NaN	1	1	NaN	NaN	NaN	1	1	4
1372	'>Reverse >gi|148886718|ref|NP_079212.2| zinc finger CCHC domain-containing protein 4 [Homo sapiens]'	1	NaN	NaN	1	NaN	NaN	NaN	NaN	1	1	2
1373	'>Reverse >gi|507417947|ref|NP_001265253.1| tastin isoform 3 [Homo sapiens]'	NaN	NaN	NaN	1	1	NaN	NaN	NaN	1	1	2
1374	'>Reverse >gi|557878673|ref|NP_001273644.1| cytosolic carboxypeptidase 1 isoform a [Homo sapiens]'	1	1	NaN	NaN	NaN	NaN	NaN	NaN	1	1	2
1375	'''>Reverse >gi|578811764|ref|XP_006715191.1| PREDICTED: threonylcarbamoyladenosine tRNA methylthiotransferase isoform X2 [Homo sap...'' <Preview truncated at 128 characters>'	NaN	NaN	NaN	1	NaN	NaN	NaN	1	1	1	2
1376	'>Reverse >gi|96974985|ref|NP_060191.3| coiled-coil and C2 domain-containing protein 1A [Homo sapiens]'	NaN	1	NaN	NaN	NaN	NaN	1	NaN	1	1	2
1377	'>Reverse >gi|105990532|ref|NP_000375.2| apolipoprotein B-100 precursor [Homo sapiens]'	NaN	NaN	NaN	NaN	1	NaN	NaN	NaN	1	1	1
1378	'>Reverse >gi|106049295|ref|NP_000911.2| pyruvate carboxylase, mitochondrial precursor [Homo sapiens]'	NaN	NaN	NaN	NaN	NaN	NaN	NaN	1	1	1	1
1379	'>Reverse >gi|113722116|ref|NP_079455.3| plexin-A2 precursor [Homo sapiens]'	NaN	NaN	1	NaN	NaN	NaN	NaN	NaN	1	1	1
1380	'>Reverse >gi|11386189|ref|NP_006674.2| epididymal secretory protein E3-alpha precursor [Homo sapiens]'	NaN	NaN	NaN	NaN	1	NaN	NaN	NaN	1	1	1
1381	'>Reverse >gi|116256464|ref|NP_997245.2| uncharacterized protein KIAA1211-like [Homo sapiens]'	NaN	NaN	NaN	NaN	1	NaN	NaN	NaN	1	1	1
1382	'>Reverse >gi|119964721|ref|NP_005237.2| tyrosine-protein kinase Fer [Homo sapiens]'	NaN	NaN	NaN	NaN	NaN	1	NaN	NaN	1	1	1
1383	'>Reverse >gi|121114287|ref|NP_056131.2| apoptosis-stimulating of p53 protein 1 [Homo sapiens]'	NaN	NaN	NaN	NaN	1	NaN	NaN	NaN	1	1	1
1384	'>Reverse >gi|13899233|ref|NP_113609.1| tetratricopeptide repeat protein 25 [Homo sapiens]'	NaN	1	NaN	NaN	NaN	NaN	NaN	NaN	1	1	1
1385	'>Reverse >gi|14149764|ref|NP_115491.1| potassium channel subfamily K member 16 isoform 2 [Homo sapiens]'	NaN	NaN	NaN	NaN	1	NaN	NaN	NaN	1	1	1
1386	'>Reverse >gi|14211540|ref|NP_066014.1| putative helicase MOV-10 isoform 1 [Homo sapiens]'	NaN	NaN	NaN	NaN	NaN	NaN	1	NaN	1	1	1
1387	'>Reverse >gi|153251229|ref|NP_001258.2| chondroadherin precursor [Homo sapiens]'	NaN	NaN	NaN	NaN	NaN	1	NaN	NaN	1	1	1
1388	'>Reverse >gi|197245440|ref|NP_056052.2| uncharacterized protein KIAA1107 [Homo sapiens]'	1	NaN	NaN	NaN	NaN	NaN	NaN	NaN	1	1	1
1389	'>Reverse >gi|209862994|ref|NP_003673.3| MAP kinase-activating death domain protein isoform d [Homo sapiens]'	NaN	1	NaN	NaN	NaN	NaN	NaN	NaN	1	1	1
1390	'>Reverse >gi|211971008|ref|NP_001130010.1| acyl-CoA dehydrogenase family member 10 isoform a [Homo sapiens]'	NaN	NaN	NaN	NaN	NaN	1	NaN	NaN	1	1	1
1391	'>Reverse >gi|21687020|ref|NP_660288.1| EVI5-like protein isoform 2 [Homo sapiens]'	NaN	1	NaN	NaN	NaN	NaN	NaN	NaN	1	1	1
1392	'>Reverse >gi|22035594|ref|NP_663619.1| 39S ribosomal protein L35, mitochondrial isoform b [Homo sapiens]'	NaN	NaN	NaN	NaN	NaN	NaN	NaN	1	1	1	1
1393	'>Reverse >gi|222136583|ref|NP_001558.3| phosphatidylinositol 3,4,5-trisphosphate 5-phosphatase 2 [Homo sapiens]'	NaN	NaN	NaN	NaN	NaN	NaN	NaN	1	1	1	1
1394	'>Reverse >gi|224586880|ref|NP_001139120.1| ras-specific guanine nucleotide-releasing factor 1 isoform 3 [Homo sapiens]'	NaN	NaN	NaN	NaN	NaN	1	NaN	NaN	1	1	1
1395	'>Reverse >gi|22748999|ref|NP_689687.1| uncharacterized protein C19orf18 precursor [Homo sapiens]'	NaN	1	NaN	NaN	NaN	NaN	NaN	NaN	1	1	1
1396	'>Reverse >gi|23097308|ref|NP_149062.1| nesprin-1 isoform 2 [Homo sapiens]'	NaN	NaN	NaN	NaN	NaN	NaN	1	NaN	1	1	1
1397	'>Reverse >gi|238814322|ref|NP_001029345.2| mitochondrial 10-formyltetrahydrofolate dehydrogenase precursor [Homo sapiens]'	NaN	NaN	NaN	NaN	NaN	1	NaN	NaN	1	1	1
1398	'>Reverse >gi|24308273|ref|NP_067066.1| costars family protein ABRACL [Homo sapiens]'	1	NaN	NaN	NaN	NaN	NaN	NaN	NaN	1	1	1
1399	'>Reverse >gi|24308382|ref|NP_443157.1| leukocyte receptor cluster member 8 [Homo sapiens]'	NaN	NaN	NaN	NaN	NaN	1	NaN	NaN	1	1	1
1400	'>Reverse >gi|24371272|ref|NP_714968.1| probable palmitoyltransferase ZDHHC14 isoform 2 [Homo sapiens]'	NaN	NaN	NaN	NaN	1	NaN	NaN	NaN	1	1	1
1401	'''>Reverse >gi|269847558|ref|NP_001161384.1| ventricular zone-expressed PH domain-containing protein homolog 1 isoform 1 [Homo sap...'' <Preview truncated at 128 characters>'	NaN	NaN	NaN	NaN	NaN	NaN	NaN	1	1	1	1
1402	'>Reverse >gi|27436953|ref|NP_525023.2| ATP-binding cassette sub-family A member 6 [Homo sapiens]'	NaN	NaN	NaN	NaN	NaN	NaN	1	NaN	1	1	1
1403	'>Reverse >gi|27735113|ref|NP_775774.1| EF-hand calcium-binding domain-containing protein 3 isoform b [Homo sapiens]'	NaN	NaN	1	NaN	NaN	NaN	NaN	NaN	1	1	1
1404	'>Reverse >gi|283436224|ref|NP_001164007.1| ATPase family AAA domain-containing protein 3A isoform 3 [Homo sapiens]'	NaN	NaN	NaN	NaN	NaN	NaN	NaN	1	1	1	1
1405	'>Reverse >gi|299758394|ref|NP_001177645.1| dynamin-2 isoform 5 [Homo sapiens]'	1	NaN	NaN	NaN	NaN	NaN	NaN	NaN	1	1	1
1406	'>Reverse >gi|31795563|ref|NP_775489.2| tryptophan 5-hydroxylase 2 [Homo sapiens]'	NaN	NaN	NaN	NaN	NaN	NaN	NaN	1	1	1	1
1407	'>Reverse >gi|325053678|ref|NP_001191347.1| regulator of G-protein signaling 6 isoform 4 [Homo sapiens]'	NaN	NaN	1	NaN	NaN	NaN	NaN	NaN	1	1	1
1408	'>Reverse >gi|33519440|ref|NP_878272.1| E3 ubiquitin-protein ligase CCNB1IP1 [Homo sapiens]'	NaN	NaN	NaN	NaN	1	NaN	NaN	NaN	1	1	1
1409	'>Reverse >gi|344925930|ref|NP_001230715.1| V(D)J recombination-activating protein 2 [Homo sapiens]'	NaN	NaN	NaN	NaN	1	NaN	NaN	NaN	1	1	1
1410	'>Reverse >gi|358679318|ref|NP_001240628.1| protein LAP2 isoform 8 [Homo sapiens]'	NaN	NaN	NaN	NaN	NaN	NaN	NaN	1	1	1	1
1411	'>Reverse >gi|39930371|ref|NP_059986.1| ras-related protein Rab-39A [Homo sapiens]'	NaN	NaN	NaN	NaN	NaN	1	NaN	NaN	1	1	1
1412	'>Reverse >gi|39930463|ref|NP_085142.1| protein BHLHb9 [Homo sapiens]'	NaN	NaN	NaN	1	NaN	NaN	NaN	NaN	1	1	1
1413	'>Reverse >gi|42476024|ref|NP_060206.2| THUMP domain-containing protein 1 [Homo sapiens]'	NaN	1	NaN	NaN	NaN	NaN	NaN	NaN	1	1	1
1414	'>Reverse >gi|44917604|ref|NP_065813.1| SLIT-ROBO Rho GTPase-activating protein 1 [Homo sapiens]'	NaN	NaN	1	NaN	NaN	NaN	NaN	NaN	1	1	1
1415	'>Reverse >gi|4503923|ref|NP_000796.1| gastrin preproprotein [Homo sapiens]'	NaN	NaN	1	NaN	NaN	NaN	NaN	NaN	1	1	1
1416	'>Reverse >gi|4506039|ref|NP_003972.1| protein regulator of cytokinesis 1 isoform 1 [Homo sapiens]'	NaN	NaN	1	NaN	NaN	NaN	NaN	NaN	1	1	1
1417	'>Reverse >gi|4506283|ref|NP_003454.1| protein tyrosine phosphatase type IVA 1 [Homo sapiens]'	NaN	NaN	1	NaN	NaN	NaN	NaN	NaN	1	1	1
1418	'>Reverse >gi|4507101|ref|NP_003073.1| snRNA-activating protein complex subunit 1 [Homo sapiens]'	NaN	NaN	NaN	1	NaN	NaN	NaN	NaN	1	1	1
1419	'>Reverse >gi|4826816|ref|NP_005088.1| leucine-rich glioma-inactivated protein 1 precursor [Homo sapiens]'	NaN	NaN	NaN	NaN	1	NaN	NaN	NaN	1	1	1
1420	'>Reverse >gi|4885193|ref|NP_005215.1| AT-rich interactive domain-containing protein 3A [Homo sapiens]'	NaN	NaN	NaN	1	NaN	NaN	NaN	NaN	1	1	1
1421	'>Reverse >gi|50083293|ref|NP_116205.3| centrosomal protein of 89 kDa [Homo sapiens]'	NaN	NaN	NaN	1	NaN	NaN	NaN	NaN	1	1	1
1422	'>Reverse >gi|51242955|ref|NP_001003787.1| STE20-related kinase adapter protein alpha isoform 1 [Homo sapiens]'	NaN	NaN	NaN	1	NaN	NaN	NaN	NaN	1	1	1
1423	'>Reverse >gi|51896039|ref|NP_001004106.1| G protein-coupled receptor kinase 6 isoform A [Homo sapiens]'	NaN	NaN	NaN	NaN	NaN	1	NaN	NaN	1	1	1
1424	'>Reverse >gi|523704333|ref|NP_005818.2| solute carrier family 35 member B1 isoform 1 [Homo sapiens]'	NaN	NaN	NaN	NaN	NaN	NaN	1	NaN	1	1	1
1425	'>Reverse >gi|530357935|ref|XP_005275995.1| PREDICTED: rootletin-like [Homo sapiens]'	NaN	1	NaN	NaN	NaN	NaN	NaN	NaN	1	1	1
1426	'>Reverse >gi|530367265|ref|XP_005264214.1| PREDICTED: COMM domain-containing protein 1 isoform X1 [Homo sapiens]'	NaN	NaN	NaN	NaN	1	NaN	NaN	NaN	1	1	1
1427	'>Reverse >gi|530374913|ref|XP_005247654.1| PREDICTED: YEATS domain-containing protein 2 isoform X1 [Homo sapiens]'	NaN	NaN	NaN	NaN	1	NaN	NaN	NaN	1	1	1
1428	'>Reverse >gi|530383304|ref|XP_005266849.1| PREDICTED: transmembrane protein FLJ37396 isoform X1 [Homo sapiens]'	NaN	NaN	1	NaN	NaN	NaN	NaN	NaN	1	1	1
1429	'>Reverse >gi|530383986|ref|XP_005267166.1| PREDICTED: sphingomyelin phosphodiesterase 2 isoform X2 [Homo sapiens]'	NaN	NaN	NaN	NaN	NaN	NaN	1	NaN	1	1	1
1430	'''>Reverse >gi|530386889|ref|XP_005249999.1| PREDICTED: arf-GAP with GTPase, ANK repeat and PH domain-containing protein 3 isoform...'' <Preview truncated at 128 characters>'	NaN	NaN	1	NaN	NaN	NaN	NaN	NaN	1	1	1
1431	'>Reverse >gi|530407381|ref|XP_005255064.1| PREDICTED: uncharacterized protein LOC101927662 isoform X1 [Homo sapiens]'	NaN	NaN	NaN	NaN	NaN	1	NaN	NaN	1	1	1
1432	'>Reverse >gi|530415206|ref|XP_005260136.1| PREDICTED: occludin/ELL domain-containing protein 1 isoform X1 [Homo sapiens]'	NaN	NaN	NaN	NaN	1	NaN	NaN	NaN	1	1	1
1433	'''>Reverse >gi|530420097|ref|XP_005261665.1| PREDICTED: beta-1,4-mannosyl-glycoprotein 4-beta-N-acetylglucosaminyltransferase isof...'' <Preview truncated at 128 characters>'	NaN	NaN	NaN	NaN	NaN	NaN	1	NaN	1	1	1
1434	'>Reverse >gi|545688691|ref|NP_001269970.1| ubiquitin carboxyl-terminal hydrolase 25 isoform USP25m [Homo sapiens]'	NaN	1	NaN	NaN	NaN	NaN	NaN	NaN	1	1	1
1435	'>Reverse >gi|555289992|ref|NP_001273135.1| centrosomal protein of 162 kDa isoform b [Homo sapiens]'	NaN	1	NaN	NaN	NaN	NaN	NaN	NaN	1	1	1
1436	'>Reverse >gi|568384734|ref|NP_001275511.1| tetratricopeptide repeat protein 14 isoform c [Homo sapiens]'	NaN	1	NaN	NaN	NaN	NaN	NaN	NaN	1	1	1
1437	'>Reverse >gi|570359601|ref|NP_001275668.1| dynamin-1 isoform 4 [Homo sapiens]'	1	NaN	NaN	NaN	NaN	NaN	NaN	NaN	1	1	1
1438	'>Reverse >gi|578823155|ref|XP_006719245.1| PREDICTED: tastin isoform X2 [Homo sapiens]'	NaN	1	NaN	NaN	NaN	NaN	NaN	NaN	1	1	1
1439	'>Reverse >gi|58219064|ref|NP_001010846.1| SH2 domain-containing adapter protein E [Homo sapiens]'	NaN	NaN	1	NaN	NaN	NaN	NaN	NaN	1	1	1
1440	'>Reverse >gi|604723370|ref|NP_699165.3| scavenger receptor class F member 2 isoform 1 precursor [Homo sapiens]'	NaN	NaN	NaN	NaN	NaN	1	NaN	NaN	1	1	1
1441	'>Reverse >gi|665821155|ref|NP_001287877.1| lon protease homolog 2, peroxisomal isoform 2 [Homo sapiens]'	NaN	NaN	NaN	1	NaN	NaN	NaN	NaN	1	1	1
1442	'>Reverse >gi|669174625|ref|NP_001288177.1| ELKS/Rab6-interacting/CAST family member 1 isoform zeta [Homo sapiens]'	NaN	NaN	1	NaN	NaN	NaN	NaN	NaN	1	1	1
1443	'>Reverse >gi|66932999|ref|NP_006276.2| dual specificity testis-specific protein kinase 1 [Homo sapiens]'	NaN	NaN	NaN	NaN	1	NaN	NaN	NaN	1	1	1
1444	'>Reverse >gi|7657198|ref|NP_055288.1| probable dimethyladenosine transferase [Homo sapiens]'	NaN	NaN	NaN	NaN	NaN	NaN	NaN	1	1	1	1
1445	'>Reverse >gi|84872173|ref|NP_003423.1| zinc finger protein 131 isoform 2 [Homo sapiens]'	NaN	NaN	NaN	1	NaN	NaN	NaN	NaN	1	1	1
1446	'>Reverse >gi|87298939|ref|NP_689607.2| glutamate-rich protein 6 [Homo sapiens]'	1	NaN	NaN	NaN	NaN	NaN	NaN	NaN	1	1	1
1447	'>Reverse >gi|90819229|ref|NP_758441.2| cTAGE family member 2 [Homo sapiens]'	NaN	1	NaN	NaN	NaN	NaN	NaN	NaN	1	1	1
1448	'>Reverse >gi|93204867|ref|NP_065803.2| probable G-protein coupled receptor 158 precursor [Homo sapiens]'	NaN	NaN	NaN	NaN	NaN	NaN	NaN	1	1	1	1
1449	'>gi|192807292|ref|NP_061889.2| keratin, type I cytoskeletal 24 [Homo sapiens]'	NaN	1	NaN	NaN	NaN	NaN	NaN	NaN	1	1	1
1450	'>gi|27477127|ref|NP_149022.3| keratin, type II cuticular Hb2 [Homo sapiens]'	NaN	1	NaN	NaN	NaN	NaN	NaN	NaN	1	1	1
1451	'>gi|27894337|ref|NP_061883.1| keratin, type I cytoskeletal 20 [Homo sapiens]'	NaN	1	NaN	NaN	NaN	NaN	NaN	NaN	1	1	1
1452	'>gi|67782365|ref|NP_005547.3| keratin, type II cytoskeletal 7 [Homo sapiens]'	NaN	1	NaN	NaN	NaN	NaN	NaN	NaN	1	1	1
1453	'>sp|CAS2_BOVIN|(Common contaminant protein)'	NaN	NaN	1	NaN	NaN	NaN	NaN	NaN	1	1	1
1454	'>sp|K2C1_HUMAN|(Common contaminant protein)'	NaN	NaN	NaN	NaN	1	NaN	NaN	NaN	1	1	1
1455	'>sp|TRY1_BOVIN|(Common contaminant protein)'	1	NaN	NaN	NaN	NaN	NaN	NaN	NaN	1	1	1

## Sheet: Local
Rank Number	Protein Name	SA11-5S_01	SA11-5S_02	SA11-5S_03	SA11-5S_04	SA11-5S_05	SA11-5S_06	SA11-5S_07	SA11-5S_08	CONTAMINANT	MAX	SUM
1	'>gi|41399285|ref|NP_955472.1| 60 kDa heat shock protein, mitochondrial [Homo sapiens]'	23	17	41	116	264	51	25	1	0	264	538
2	'>SA11-5S-N-NSP1'	50	45	51	90	204	83	67	4	0	204	594
3	'>gi|13654237|ref|NP_008835.5| DNA-dependent protein kinase catalytic subunit isoform 1 [Homo sapiens]'	141	168	53	NaN	NaN	NaN	NaN	NaN	0	168	362
4	'>gi|57013276|ref|NP_006073.2| tubulin alpha-1B chain [Homo sapiens]'	19	17	NaN	1	129	42	NaN	NaN	0	129	208
5	'>gi|29788785|ref|NP_821133.1| tubulin beta chain isoform b [Homo sapiens]'	20	25	22	36	127	28	13	3	0	127	274
6	'>gi|153945728|ref|NP_005900.2| microtubule-associated protein 1B [Homo sapiens]'	63	88	20	20	13	4	NaN	NaN	0	88	208
7	'>gi|4504733|ref|NP_003595.1| insulin receptor substrate 4 [Homo sapiens]'	8	6	82	NaN	NaN	13	5	NaN	0	82	114
8	'>gi|5729877|ref|NP_006588.1| heat shock cognate 71 kDa protein isoform 1 [Homo sapiens]'	8	NaN	23	60	78	NaN	3	NaN	0	78	172
9	'>gi|578838539|ref|XP_006724776.1| PREDICTED: insulin receptor substrate 4 isoform X2 [Homo sapiens]'	NaN	NaN	NaN	78	45	NaN	NaN	NaN	0	78	123
10	'>gi|154146191|ref|NP_005339.3| heat shock protein HSP 90-alpha isoform 2 [Homo sapiens]'	NaN	NaN	11	65	9	NaN	NaN	NaN	0	65	85
11	'>gi|58530840|ref|NP_004406.2| desmoplakin isoform I [Homo sapiens]'	44	47	52	47	27	63	15	26	0	63	321
12	'>gi|4557553|ref|NP_000108.1| emerin [Homo sapiens]'	NaN	NaN	NaN	6	28	61	2	NaN	0	61	97
13	'>gi|61676188|ref|NP_113584.3| E3 ubiquitin-protein ligase HUWE1 [Homo sapiens]'	60	25	5	NaN	NaN	NaN	NaN	NaN	0	60	90
14	'>gi|283436222|ref|NP_001164006.1| ATPase family AAA domain-containing protein 3A isoform 2 [Homo sapiens]'	NaN	NaN	NaN	25	59	NaN	NaN	NaN	0	59	84
15	'>gi|237681109|ref|NP_001153705.1| sodium/potassium-transporting ATPase subunit alpha-1 isoform c [Homo sapiens]'	NaN	NaN	12	56	NaN	NaN	NaN	NaN	0	56	68
16	'>gi|5031741|ref|NP_005871.1| dnaJ homolog subfamily A member 2 [Homo sapiens]'	2	1	NaN	9	54	22	4	NaN	0	54	92
17	'>gi|33350932|ref|NP_001367.2| cytoplasmic dynein 1 heavy chain 1 [Homo sapiens]'	51	NaN	NaN	NaN	NaN	NaN	NaN	NaN	0	51	51
18	'>gi|22202629|ref|NP_665811.1| apoptosis-inducing factor 1, mitochondrial isoform 2 precursor [Homo sapiens]'	NaN	NaN	8	35	50	7	NaN	NaN	0	50	100
19	'>gi|24638454|ref|NP_733765.1| sarcoplasmic/endoplasmic reticulum calcium ATPase 2 isoform b [Homo sapiens]'	NaN	NaN	NaN	50	NaN	NaN	NaN	NaN	0	50	50
20	'>gi|528524479|ref|NP_001268649.1| polyubiquitin-B precursor [Homo sapiens]'	12	9	NaN	49	44	14	12	1	0	49	141
21	'>gi|167466173|ref|NP_005337.2| heat shock 70 kDa protein 1A/1B [Homo sapiens]'	1	NaN	5	29	49	NaN	NaN	NaN	0	49	84
22	'>gi|54607053|ref|NP_006827.1| translational activator GCN1 [Homo sapiens]'	NaN	46	4	NaN	NaN	NaN	NaN	NaN	0	46	50
23	'>gi|157412270|ref|NP_112480.2| heterogeneous nuclear ribonucleoprotein M isoform b [Homo sapiens]'	NaN	NaN	NaN	41	32	NaN	NaN	NaN	0	41	73
24	'>gi|148470406|ref|NP_001091676.1| heterogeneous nuclear ribonucleoprotein F [Homo sapiens]'	2	NaN	5	3	39	16	4	1	0	39	70
25	'>gi|4504511|ref|NP_001530.1| dnaJ homolog subfamily A member 1 [Homo sapiens]'	NaN	1	NaN	9	39	11	4	NaN	0	39	64
26	'>gi|48762932|ref|NP_006576.2| T-complex protein 1 subunit theta isoform 1 [Homo sapiens]'	NaN	NaN	NaN	11	39	NaN	NaN	NaN	0	39	50
27	'>gi|8051636|ref|NP_009166.2| exportin-T [Homo sapiens]'	NaN	NaN	7	38	NaN	NaN	NaN	NaN	0	38	45
28	'>gi|578833177|ref|XP_005259911.2| PREDICTED: A-kinase anchor protein 8-like isoform X1 [Homo sapiens]'	NaN	NaN	NaN	38	NaN	NaN	NaN	NaN	0	38	38
29	'>gi|55770844|ref|NP_001894.2| catenin alpha-1 isoform 1 [Homo sapiens]'	NaN	NaN	10	37	NaN	NaN	NaN	NaN	0	37	47
30	'>gi|208022622|ref|NP_001129064.1| ubiquitin-40S ribosomal protein S27a precursor [Homo sapiens]'	NaN	NaN	37	NaN	NaN	NaN	NaN	NaN	0	37	37
31	'>gi|431822408|ref|NP_001258901.1| heat shock protein HSP 90-beta isoform c [Homo sapiens]'	5	7	22	35	24	3	2	NaN	0	35	98
32	'>gi|148529014|ref|NP_001914.3| DNA damage-binding protein 1 [Homo sapiens]'	NaN	NaN	35	22	NaN	NaN	NaN	NaN	0	35	57
33	'>gi|393715091|ref|NP_001257328.1| tubulin alpha-1A chain isoform 1 [Homo sapiens]'	NaN	NaN	NaN	35	NaN	NaN	NaN	NaN	0	35	35
34	'>gi|156071459|ref|NP_001143.2| ADP/ATP translocase 2 [Homo sapiens]'	NaN	NaN	NaN	4	9	34	5	NaN	0	34	52
35	'>gi|24307939|ref|NP_036205.1| T-complex protein 1 subunit epsilon [Homo sapiens]'	NaN	NaN	NaN	11	34	NaN	NaN	NaN	0	34	45
36	'>gi|48526509|ref|NP_001001563.1| mitochondrial import inner membrane translocase subunit TIM50 [Homo sapiens]'	NaN	NaN	NaN	2	27	33	2	NaN	0	33	64
37	'>gi|41872631|ref|NP_004095.4| fatty acid synthase [Homo sapiens]'	NaN	33	3	NaN	NaN	NaN	NaN	NaN	0	33	36
38	'>gi|18105007|ref|NP_004332.2| CAD protein [Homo sapiens]'	NaN	32	28	NaN	NaN	NaN	NaN	NaN	0	32	60
39	'>gi|100913206|ref|NP_001348.2| ATP-dependent RNA helicase A [Homo sapiens]'	NaN	NaN	32	3	NaN	NaN	NaN	NaN	0	32	35
40	'>gi|4503131|ref|NP_001895.1| catenin beta-1 [Homo sapiens]'	NaN	NaN	NaN	31	2	NaN	NaN	NaN	0	31	33
41	'>gi|5031753|ref|NP_005511.1| heterogeneous nuclear ribonucleoprotein H [Homo sapiens]'	NaN	NaN	NaN	NaN	31	NaN	NaN	NaN	0	31	31
42	'>gi|4505775|ref|NP_002626.1| phosphate carrier protein, mitochondrial isoform b precursor [Homo sapiens]'	NaN	1	NaN	3	10	30	5	NaN	0	30	49
43	'>gi|355477267|ref|NP_001239051.1| PAS domain-containing serine/threonine-protein kinase isoform 3 [Homo sapiens]'	NaN	NaN	30	12	NaN	NaN	NaN	NaN	0	30	42
44	'>gi|5031579|ref|NP_005849.1| A-kinase anchor protein 8 [Homo sapiens]'	NaN	NaN	9	30	1	NaN	NaN	NaN	0	30	40
45	'>gi|530426851|ref|XP_005266190.1| PREDICTED: protein transport protein Sec16A isoform X2 [Homo sapiens]'	NaN	30	NaN	NaN	NaN	NaN	NaN	NaN	0	30	30
46	'>gi|63162572|ref|NP_005989.3| T-complex protein 1 subunit gamma isoform a [Homo sapiens]'	NaN	NaN	NaN	NaN	30	NaN	NaN	NaN	0	30	30
47	'>gi|5032179|ref|NP_005753.1| transcription intermediary factor 1-beta [Homo sapiens]'	NaN	NaN	16	29	NaN	NaN	NaN	NaN	0	29	45
48	'>gi|16751921|ref|NP_444513.1| dermcidin isoform 1 preproprotein [Homo sapiens]'	NaN	NaN	NaN	12	NaN	29	NaN	NaN	0	29	41
49	'>gi|393715095|ref|NP_001257329.1| tubulin alpha-1A chain isoform 2 [Homo sapiens]'	NaN	NaN	27	NaN	NaN	NaN	18	3	0	27	48
50	'>gi|124378039|ref|NP_055681.1| protein transport protein Sec16A isoform 1 [Homo sapiens]'	NaN	NaN	27	NaN	NaN	NaN	NaN	NaN	0	27	27
51	'>gi|354983497|ref|NP_001238980.1| protein-L-isoaspartate(D-aspartate) O-methyltransferase isoform 4 [Homo sapiens]'	NaN	NaN	NaN	NaN	NaN	27	NaN	NaN	0	27	27
52	'>gi|38455427|ref|NP_006421.2| T-complex protein 1 subunit delta isoform a [Homo sapiens]'	NaN	NaN	NaN	5	26	NaN	NaN	NaN	0	26	31
53	'>gi|109255228|ref|NP_055627.2| centrosomal protein of 170 kDa isoform alpha [Homo sapiens]'	NaN	NaN	26	2	NaN	NaN	NaN	NaN	0	26	28
54	'>gi|62122917|ref|NP_001014364.1| filaggrin-2 [Homo sapiens]'	12	12	19	6	1	25	6	5	0	25	86
55	'>gi|4506455|ref|NP_002892.1| reticulocalbin-1 precursor [Homo sapiens]'	NaN	NaN	NaN	NaN	25	10	NaN	NaN	0	25	35
56	'>gi|156523970|ref|NP_001613.2| alpha-2-HS-glycoprotein preproprotein [Homo sapiens]'	NaN	NaN	25	NaN	NaN	NaN	NaN	NaN	0	25	25
57	'>gi|4885281|ref|NP_005262.1| glutamate dehydrogenase 1, mitochondrial precursor [Homo sapiens]'	NaN	NaN	NaN	NaN	25	NaN	NaN	NaN	0	25	25
58	'>gi|110825982|ref|NP_057407.2| E3 ISG15--protein ligase HERC5 [Homo sapiens]'	NaN	NaN	22	24	2	NaN	NaN	NaN	0	24	48
59	'>gi|255918196|ref|NP_001157634.1| serine/threonine-protein phosphatase 6 regulatory subunit 3 isoform 1 [Homo sapiens]'	NaN	NaN	24	12	NaN	NaN	NaN	NaN	0	24	36
60	'>gi|4503165|ref|NP_003581.1| cullin-3 isoform 1 [Homo sapiens]'	NaN	NaN	NaN	24	2	NaN	NaN	NaN	0	24	26
61	'>gi|426214088|ref|NP_001258766.1| reticulocalbin-2 isoform b precursor [Homo sapiens]'	NaN	NaN	2	8	23	15	4	NaN	0	23	52
62	'>gi|11321601|ref|NP_002618.1| ATP-dependent 6-phosphofructokinase, platelet type isoform 1 [Homo sapiens]'	NaN	NaN	NaN	23	12	NaN	NaN	NaN	0	23	35
63	'>gi|5803225|ref|NP_006752.1| 14-3-3 protein epsilon [Homo sapiens]'	NaN	NaN	NaN	NaN	NaN	23	2	NaN	0	23	25
64	'>gi|4503483|ref|NP_001952.1| elongation factor 2 [Homo sapiens]'	NaN	NaN	NaN	23	NaN	NaN	NaN	1	0	23	24
65	'>gi|4757810|ref|NP_004037.1| ATP synthase subunit alpha, mitochondrial isoform a precursor [Homo sapiens]'	NaN	NaN	NaN	NaN	23	NaN	NaN	NaN	0	23	23
66	'>gi|5730023|ref|NP_006657.1| ruvB-like 2 [Homo sapiens]'	NaN	NaN	NaN	NaN	23	NaN	NaN	NaN	0	23	23
67	'>gi|119703744|ref|NP_001933.2| desmoglein-1 preproprotein [Homo sapiens]'	21	19	22	19	10	20	12	15	0	22	138
68	'>RVB Gene 3'	5	6	6	3	5	8	6	22	0	22	61
69	'>gi|261399877|ref|NP_001159757.1| T-complex protein 1 subunit eta isoform d [Homo sapiens]'	NaN	NaN	NaN	8	22	NaN	NaN	NaN	0	22	30
70	'>gi|4504191|ref|NP_000170.1| DNA mismatch repair protein Msh6 isoform 1 [Homo sapiens]'	NaN	NaN	22	NaN	NaN	NaN	NaN	NaN	0	22	22
71	'>gi|148613856|ref|NP_001091974.1| probable ATP-dependent RNA helicase DDX17 isoform 3 [Homo sapiens]'	NaN	NaN	NaN	21	17	NaN	NaN	NaN	0	21	38
72	'>gi|356640224|ref|NP_001239268.1| cadherin-4 isoform 3 [Homo sapiens]'	NaN	NaN	21	8	NaN	NaN	NaN	NaN	0	21	29
73	'>gi|237649019|ref|NP_001153682.1| calcium-binding mitochondrial carrier protein Aralar2 isoform 1 [Homo sapiens]'	NaN	NaN	NaN	5	21	NaN	NaN	NaN	0	21	26
74	'>gi|311771535|ref|NP_001185771.1| T-complex protein 1 subunit beta isoform 2 [Homo sapiens]'	NaN	NaN	NaN	5	21	NaN	NaN	NaN	0	21	26
75	'>gi|7657689|ref|NP_055078.1| ATP-dependent zinc metalloprotease YME1L1 isoform 3 [Homo sapiens]'	NaN	NaN	NaN	2	21	NaN	NaN	NaN	0	21	23
76	'>gi|208609990|ref|NP_055484.3| nuclear pore complex protein Nup93 isoform 1 [Homo sapiens]'	NaN	NaN	NaN	21	NaN	NaN	NaN	NaN	0	21	21
77	'>gi|21361399|ref|NP_055040.2| serine/threonine-protein phosphatase 2A 65 kDa regulatory subunit A alpha isoform [Homo sapiens]'	NaN	NaN	NaN	NaN	21	NaN	NaN	NaN	0	21	21
78	'>gi|117606360|ref|NP_056125.3| PH and SEC7 domain-containing protein 3 isoform a [Homo sapiens]'	NaN	NaN	20	3	NaN	NaN	NaN	NaN	0	20	23
79	'>gi|4506675|ref|NP_002941.1| dolichyl-diphosphooligosaccharide--protein glycosyltransferase subunit 1 precursor [Homo sapiens]'	NaN	NaN	NaN	14	19	NaN	NaN	NaN	0	19	33
80	'>gi|390979647|ref|NP_705833.3| beta/gamma crystallin domain-containing protein 3 [Homo sapiens]'	NaN	19	8	NaN	NaN	NaN	NaN	NaN	0	19	27
81	'>gi|57863257|ref|NP_110379.2| T-complex protein 1 subunit alpha isoform a [Homo sapiens]'	NaN	NaN	NaN	8	19	NaN	NaN	NaN	0	19	27
82	'>gi|4507157|ref|NP_003096.1| sortilin-related receptor preproprotein [Homo sapiens]'	NaN	19	6	NaN	NaN	NaN	NaN	NaN	0	19	25
83	'>gi|66933005|ref|NP_001019820.1| calnexin precursor [Homo sapiens]'	NaN	NaN	NaN	19	3	NaN	NaN	NaN	0	19	22
84	'>gi|225545550|ref|NP_057195.2| telomere length regulation protein TEL2 homolog [Homo sapiens]'	NaN	NaN	NaN	19	NaN	NaN	NaN	NaN	0	19	19
85	'>gi|4502643|ref|NP_001753.1| T-complex protein 1 subunit zeta isoform a [Homo sapiens]'	NaN	NaN	NaN	NaN	19	NaN	NaN	NaN	0	19	19
86	'>gi|4503471|ref|NP_001393.1| elongation factor 1-alpha 1 [Homo sapiens]'	2	4	2	7	18	5	3	1	0	18	42
87	'>gi|4507943|ref|NP_003391.1| exportin-1 [Homo sapiens]'	NaN	NaN	14	18	NaN	NaN	NaN	NaN	0	18	32
88	'>gi|4502551|ref|NP_001210.1| calumenin isoform a precursor [Homo sapiens]'	NaN	NaN	NaN	3	18	10	NaN	NaN	0	18	31
89	'>gi|66392203|ref|NP_001018146.1| NME1-NME2 protein [Homo sapiens]'	NaN	NaN	NaN	NaN	NaN	11	18	NaN	0	18	29
90	'>gi|42822864|ref|NP_976322.1| ribonuclease inhibitor [Homo sapiens]'	1	NaN	1	1	18	4	1	NaN	0	18	26
91	'>gi|618468591|ref|NP_001278557.1| endoribonuclease Dicer isoform 1 [Homo sapiens]'	NaN	2	18	3	NaN	NaN	NaN	NaN	0	18	23
92	'>gi|148664226|ref|NP_004563.2| plakophilin-2 isoform 2b [Homo sapiens]'	NaN	NaN	NaN	18	1	1	NaN	NaN	0	18	20
93	'>gi|5453660|ref|NP_006313.1| gamma-tubulin complex component 3 isoform 1 [Homo sapiens]'	NaN	NaN	NaN	18	NaN	NaN	NaN	NaN	0	18	18
94	'>gi|61744483|ref|NP_001013269.1| 4F2 cell-surface antigen heavy chain isoform f [Homo sapiens]'	NaN	NaN	3	17	4	NaN	NaN	NaN	0	17	24
95	'>gi|166235184|ref|NP_055246.2| paladin [Homo sapiens]'	NaN	NaN	NaN	17	NaN	NaN	NaN	NaN	0	17	17
96	'>gi|21361794|ref|NP_060918.2| cullin-associated NEDD8-dissociated protein 1 [Homo sapiens]'	NaN	NaN	17	NaN	NaN	NaN	NaN	NaN	0	17	17
97	'>gi|57864582|ref|NP_001009931.1| hornerin [Homo sapiens]'	6	8	11	8	3	16	6	2	0	16	60
98	'>gi|5031877|ref|NP_005564.1| lamin-B1 isoform 1 [Homo sapiens]'	NaN	NaN	NaN	11	16	NaN	NaN	NaN	0	16	27
99	'>gi|312433998|ref|NP_001186078.1| lactotransferrin isoform 2 [Homo sapiens]'	2	1	4	16	NaN	1	1	NaN	0	16	25
100	'>gi|29788768|ref|NP_821080.1| tubulin beta-2B chain [Homo sapiens]'	NaN	NaN	NaN	6	16	2	NaN	NaN	0	16	24
101	'>gi|45387945|ref|NP_065779.1| extended synaptotagmin-2 [Homo sapiens]'	NaN	NaN	NaN	16	3	NaN	NaN	NaN	0	16	19
102	'>gi|13435356|ref|NP_006109.2| HCLS1-associated protein X-1 isoform a [Homo sapiens]'	NaN	NaN	NaN	NaN	NaN	16	NaN	NaN	0	16	16
103	'>gi|205360838|ref|NP_005138.3| dnaJ homolog subfamily A member 3, mitochondrial isoform 1 [Homo sapiens]'	NaN	NaN	NaN	NaN	16	NaN	NaN	NaN	0	16	16
104	'>gi|30410796|ref|NP_789839.1| proteasome activator complex subunit 3 isoform 2 [Homo sapiens]'	NaN	NaN	NaN	NaN	NaN	16	NaN	NaN	0	16	16
105	'>gi|578836872|ref|XP_006724172.1| PREDICTED: cdc42 effector protein 1 isoform X3 [Homo sapiens]'	NaN	NaN	NaN	NaN	16	NaN	NaN	NaN	0	16	16
106	'>gi|4502337|ref|NP_001176.1| zinc-alpha-2-glycoprotein precursor [Homo sapiens]'	6	5	5	2	2	15	6	3	0	15	44
107	'>gi|4502027|ref|NP_000468.1| serum albumin preproprotein [Homo sapiens]'	6	7	NaN	NaN	7	1	6	15	0	15	42
108	'>gi|14141161|ref|NP_004492.2| heterogeneous nuclear ribonucleoprotein U isoform b [Homo sapiens]'	NaN	NaN	15	12	NaN	NaN	NaN	NaN	0	15	27
109	'>gi|31621305|ref|NP_573566.2| leucine-rich PPR motif-containing protein, mitochondrial precursor [Homo sapiens]'	NaN	NaN	15	NaN	NaN	NaN	1	NaN	0	15	16
110	'>gi|32189394|ref|NP_001677.2| ATP synthase subunit beta, mitochondrial precursor [Homo sapiens]'	NaN	NaN	NaN	NaN	15	NaN	NaN	NaN	0	15	15
111	'>gi|38201706|ref|NP_060124.2| sterile alpha motif domain-containing protein 9 [Homo sapiens]'	NaN	NaN	15	NaN	NaN	NaN	NaN	NaN	0	15	15
112	'>gi|4506439|ref|NP_002884.1| histone-binding protein RBBP7 isoform 2 [Homo sapiens]'	NaN	NaN	NaN	NaN	15	NaN	NaN	NaN	0	15	15
113	'>gi|4506787|ref|NP_003861.1| ras GTPase-activating-like protein IQGAP1 [Homo sapiens]'	NaN	NaN	15	NaN	NaN	NaN	NaN	NaN	0	15	15
114	'>gi|4504811|ref|NP_002221.1| junction plakoglobin [Homo sapiens]'	14	8	14	14	13	14	6	10	0	14	93
115	'>gi|4501887|ref|NP_001605.1| actin, cytoplasmic 2 [Homo sapiens]'	NaN	NaN	2	14	13	13	5	4	0	14	51
116	'>gi|5174735|ref|NP_006079.1| tubulin beta-4B chain [Homo sapiens]'	3	6	2	6	14	7	2	NaN	0	14	40
117	'>gi|300192933|ref|NP_006787.2| AFG3-like protein 2 [Homo sapiens]'	NaN	NaN	NaN	14	3	NaN	NaN	NaN	0	14	17
118	'>gi|18699732|ref|NP_057260.2| 45 kDa calcium-binding protein isoform 2 precursor [Homo sapiens]'	NaN	NaN	NaN	NaN	14	1	NaN	NaN	0	14	15
119	'>gi|371502112|ref|NP_001243064.1| exportin-2 isoform 2 [Homo sapiens]'	NaN	NaN	1	14	NaN	NaN	NaN	NaN	0	14	15
120	'>gi|226530908|ref|NP_005380.2| protein-L-isoaspartate(D-aspartate) O-methyltransferase isoform 1 [Homo sapiens]'	NaN	NaN	NaN	NaN	NaN	NaN	14	NaN	0	14	14
121	'>gi|4505941|ref|NP_000929.1| DNA-directed RNA polymerase II subunit RPB2 [Homo sapiens]'	NaN	NaN	14	NaN	NaN	NaN	NaN	NaN	0	14	14
122	'>gi|510937039|ref|NP_001265400.1| protein MON2 homolog isoform 4 [Homo sapiens]'	NaN	NaN	14	NaN	NaN	NaN	NaN	NaN	0	14	14
123	'>gi|665505971|ref|NP_001287783.1| dermcidin isoform 2 preproprotein [Homo sapiens]'	9	13	9	NaN	10	NaN	12	2	0	13	55
124	'>gi|290542345|ref|NP_001166599.1| YTH domain-containing family protein 2 isoform 1 [Homo sapiens]'	NaN	NaN	NaN	11	13	1	NaN	NaN	0	13	25
125	'>gi|170932494|ref|NP_003560.2| syntaxin-7 [Homo sapiens]'	NaN	7	NaN	NaN	NaN	4	NaN	13	0	13	24
126	'>gi|16507237|ref|NP_005338.1| 78 kDa glucose-regulated protein precursor [Homo sapiens]'	NaN	NaN	NaN	13	7	2	NaN	NaN	0	13	22
127	'>gi|4502285|ref|NP_001672.1| sarcoplasmic/endoplasmic reticulum calcium ATPase 2 isoform a [Homo sapiens]'	NaN	NaN	13	NaN	7	1	NaN	NaN	0	13	21
128	'>gi|68800243|ref|NP_001560.2| interleukin-1 receptor-associated kinase 1 isoform 1 [Homo sapiens]'	NaN	NaN	NaN	13	8	NaN	NaN	NaN	0	13	21
129	'>gi|62750354|ref|NP_954659.1| matrin-3 isoform a [Homo sapiens]'	NaN	NaN	13	7	NaN	NaN	NaN	NaN	0	13	20
130	'>gi|216548223|ref|NP_055664.3| synaptic vesicle glycoprotein 2A isoform 1 [Homo sapiens]'	NaN	NaN	1	13	3	NaN	NaN	NaN	0	13	17
131	'>gi|574584816|ref|NP_001276058.1| tubulin beta-4A chain isoform 3 [Homo sapiens]'	NaN	NaN	2	NaN	13	NaN	NaN	NaN	0	13	15
132	'>gi|112421013|ref|NP_065859.3| signal-induced proliferation-associated 1-like protein 2 [Homo sapiens]'	NaN	NaN	13	NaN	NaN	NaN	NaN	NaN	0	13	13
133	'>gi|133925803|ref|NP_001076047.1| RNA binding protein fox-1 homolog 2 isoform 5 [Homo sapiens]'	NaN	NaN	NaN	NaN	13	NaN	NaN	NaN	0	13	13
134	'>gi|14165439|ref|NP_002131.2| heterogeneous nuclear ribonucleoprotein K isoform a [Homo sapiens]'	NaN	NaN	NaN	NaN	13	NaN	NaN	NaN	0	13	13
135	'>gi|18643383|ref|NP_079470.1| inositol-trisphosphate 3-kinase C [Homo sapiens]'	NaN	NaN	NaN	13	NaN	NaN	NaN	NaN	0	13	13
136	'>gi|19923142|ref|NP_002256.2| importin subunit beta-1 isoform 1 [Homo sapiens]'	NaN	NaN	NaN	13	NaN	NaN	NaN	NaN	0	13	13
137	'>gi|4506753|ref|NP_003698.1| ruvB-like 1 [Homo sapiens]'	NaN	NaN	NaN	NaN	13	NaN	NaN	NaN	0	13	13
138	'>gi|4508011|ref|NP_003444.1| zinc finger MYM-type protein 2 [Homo sapiens]'	NaN	NaN	13	NaN	NaN	NaN	NaN	NaN	0	13	13
139	'>gi|5453906|ref|NP_006310.1| CDP-diacylglycerol--inositol 3-phosphatidyltransferase isoform 1 [Homo sapiens]'	NaN	NaN	NaN	NaN	NaN	NaN	13	NaN	0	13	13
140	'>gi|66528888|ref|NP_001018125.1| Fanconi anemia group D2 protein isoform b [Homo sapiens]'	NaN	NaN	13	NaN	NaN	NaN	NaN	NaN	0	13	13
141	'>gi|576583524|ref|NP_001276675.1| glyceraldehyde-3-phosphate dehydrogenase isoform 1 [Homo sapiens]'	6	4	3	5	2	12	3	6	0	12	41
142	'>gi|5454064|ref|NP_006319.1| RNA-binding protein 14 isoform 1 [Homo sapiens]'	NaN	NaN	NaN	12	9	NaN	NaN	NaN	0	12	21
143	'>gi|4757834|ref|NP_004273.1| BAG family molecular chaperone regulator 2 [Homo sapiens]'	NaN	NaN	NaN	NaN	1	12	7	NaN	0	12	20
144	'>gi|56181387|ref|NP_005852.2| E3 ubiquitin-protein ligase CHIP isoform a [Homo sapiens]'	NaN	NaN	NaN	NaN	6	12	NaN	NaN	0	12	18
145	'>gi|4505357|ref|NP_002480.1| NADH dehydrogenase [ubiquinone] 1 alpha subcomplex subunit 4 [Homo sapiens]'	NaN	NaN	NaN	NaN	1	2	12	2	0	12	17
146	'>gi|38505222|ref|NP_061895.3| protein disulfide-isomerase TMX3 precursor [Homo sapiens]'	NaN	NaN	NaN	3	12	NaN	NaN	NaN	0	12	15
147	'>gi|73760405|ref|NP_001027454.1| thymopoietin isoform beta [Homo sapiens]'	NaN	NaN	NaN	1	12	2	NaN	NaN	0	12	15
148	'>gi|221316632|ref|NP_001137534.1| coatomer subunit beta [Homo sapiens]'	NaN	NaN	NaN	12	NaN	NaN	NaN	NaN	0	12	12
149	'>gi|26051235|ref|NP_060700.2| nuclear pore complex protein Nup133 [Homo sapiens]'	NaN	NaN	12	NaN	NaN	NaN	NaN	NaN	0	12	12
150	'>gi|301172750|ref|NP_002449.2| mucin-5B precursor [Homo sapiens]'	NaN	NaN	NaN	12	NaN	NaN	NaN	NaN	0	12	12
151	'''>gi|4506019|ref|NP_002708.1| serine/threonine-protein phosphatase 2A 55 kDa regulatory subunit B alpha isoform isoform 1 [Homo s...'' <Preview truncated at 128 characters>'	NaN	NaN	NaN	NaN	12	NaN	NaN	NaN	0	12	12
152	'>gi|4506725|ref|NP_000998.1| 40S ribosomal protein S4, X isoform X isoform [Homo sapiens]'	NaN	NaN	NaN	NaN	NaN	12	NaN	NaN	0	12	12
153	'>gi|62414289|ref|NP_003371.2| vimentin [Homo sapiens]'	NaN	NaN	NaN	NaN	12	NaN	NaN	NaN	0	12	12
154	'>gi|8922665|ref|NP_060686.1| pantothenate kinase 4 [Homo sapiens]'	NaN	NaN	NaN	12	NaN	NaN	NaN	NaN	0	12	12
155	'>gi|5032093|ref|NP_005619.1| neutral amino acid transporter B(0) isoform 1 [Homo sapiens]'	1	NaN	4	11	9	NaN	NaN	NaN	0	11	25
156	'>gi|151101459|ref|NP_055746.3| serine/threonine-protein phosphatase 6 regulatory subunit 1 [Homo sapiens]'	NaN	NaN	11	8	NaN	NaN	NaN	NaN	0	11	19
157	'>gi|308387374|ref|NP_001184147.1| cAMP-specific 3'',5''-cyclic phosphodiesterase 4D isoform PDE4D5 [Homo sapiens]'	2	2	NaN	11	2	NaN	NaN	1	0	11	18
158	'>gi|4505067|ref|NP_002349.1| mitotic spindle assembly checkpoint protein MAD2A [Homo sapiens]'	NaN	NaN	NaN	NaN	NaN	11	7	NaN	0	11	18
159	'>gi|14043072|ref|NP_112533.1| heterogeneous nuclear ribonucleoproteins A2/B1 isoform B1 [Homo sapiens]'	NaN	NaN	NaN	NaN	11	6	NaN	NaN	0	11	17
160	'''>gi|20070197|ref|NP_005207.2| dolichyl-diphosphooligosaccharide--protein glycosyltransferase 48 kDa subunit precursor [Homo sapi...'' <Preview truncated at 128 characters>'	NaN	NaN	NaN	NaN	11	3	NaN	NaN	0	11	14
161	'>gi|4758138|ref|NP_004387.1| probable ATP-dependent RNA helicase DDX5 [Homo sapiens]'	NaN	NaN	NaN	3	11	NaN	NaN	NaN	0	11	14
162	'>gi|13654270|ref|NP_112483.1| ribosomal biogenesis protein LAS1L isoform 1 [Homo sapiens]'	NaN	NaN	2	11	NaN	NaN	NaN	NaN	0	11	13
163	'>gi|17986001|ref|NP_005505.2| major histocompatibility complex, class I, B precursor [Homo sapiens]'	NaN	NaN	NaN	NaN	11	1	NaN	NaN	0	11	12
164	'>gi|237681111|ref|NP_001153706.1| sodium/potassium-transporting ATPase subunit alpha-1 isoform d [Homo sapiens]'	NaN	NaN	NaN	NaN	11	1	NaN	NaN	0	11	12
165	'>gi|145309311|ref|NP_001034680.2| probable ubiquitin carboxyl-terminal hydrolase FAF-X isoform 4 [Homo sapiens]'	NaN	11	NaN	NaN	NaN	NaN	NaN	NaN	0	11	11
166	'>gi|192448443|ref|NP_068758.3| peptidyl-prolyl cis-trans isomerase FKBP10 precursor [Homo sapiens]'	NaN	NaN	NaN	11	NaN	NaN	NaN	NaN	0	11	11
167	'>gi|197927448|ref|NP_060501.3| WD repeat-containing protein 6 [Homo sapiens]'	NaN	NaN	NaN	11	NaN	NaN	NaN	NaN	0	11	11
168	'>gi|212549553|ref|NP_060090.2| interleukin enhancer-binding factor 3 isoform d [Homo sapiens]'	NaN	NaN	NaN	11	NaN	NaN	NaN	NaN	0	11	11
169	'>gi|231573214|ref|NP_056380.2| E3 ubiquitin-protein ligase listerin [Homo sapiens]'	NaN	NaN	11	NaN	NaN	NaN	NaN	NaN	0	11	11
170	'>gi|443497964|ref|NP_001263218.1| cAMP-dependent protein kinase type I-alpha regulatory subunit isoform a [Homo sapiens]'	NaN	NaN	NaN	NaN	11	NaN	NaN	NaN	0	11	11
171	'>gi|530366266|ref|XP_005273220.1| PREDICTED: polymeric immunoglobulin receptor isoform X1 [Homo sapiens]'	NaN	NaN	NaN	11	NaN	NaN	NaN	NaN	0	11	11
172	'>gi|544583486|ref|NP_001269802.1| E3 ubiquitin-protein ligase UBR5 isoform 2 [Homo sapiens]'	NaN	11	NaN	NaN	NaN	NaN	NaN	NaN	0	11	11
173	'>gi|642945631|ref|NP_001254479.2| titin isoform IC [Homo sapiens]'	NaN	11	NaN	NaN	NaN	NaN	NaN	NaN	0	11	11
174	'>gi|223278387|ref|NP_059118.2| calmodulin-like protein 5 [Homo sapiens]'	5	6	6	10	7	9	10	9	0	10	62
175	'>gi|34147630|ref|NP_003312.3| elongation factor Tu, mitochondrial precursor [Homo sapiens]'	7	10	8	6	9	3	8	NaN	0	10	51
176	'>gi|118197272|ref|NP_060506.5| autophagy-related protein 2 homolog B [Homo sapiens]'	NaN	5	10	NaN	5	NaN	NaN	NaN	0	10	20
177	'>gi|29826282|ref|NP_817092.1| protein phosphatase 1G [Homo sapiens]'	NaN	NaN	NaN	8	10	1	NaN	NaN	0	10	19
178	'>gi|24234686|ref|NP_694881.1| heat shock cognate 71 kDa protein isoform 2 [Homo sapiens]'	NaN	5	NaN	NaN	NaN	10	NaN	3	0	10	18
179	'>gi|301171467|ref|NP_001180345.1| ATP-dependent RNA helicase DDX3X isoform 2 [Homo sapiens]'	NaN	NaN	NaN	10	8	NaN	NaN	NaN	0	10	18
180	'>gi|48762920|ref|NP_002617.3| ATP-dependent 6-phosphofructokinase, liver type isoform b [Homo sapiens]'	NaN	NaN	NaN	10	8	NaN	NaN	NaN	0	10	18
181	'>gi|33636719|ref|NP_006342.2| mitochondrial import inner membrane translocase subunit TIM44 [Homo sapiens]'	NaN	NaN	NaN	NaN	7	10	NaN	NaN	0	10	17
182	'>gi|4506667|ref|NP_000993.1| 60S acidic ribosomal protein P0 [Homo sapiens]'	NaN	NaN	NaN	NaN	6	10	NaN	NaN	0	10	16
183	'>gi|117168248|ref|NP_057479.2| very-long-chain (3R)-3-hydroxyacyl-CoA dehydratase 3 [Homo sapiens]'	NaN	NaN	NaN	NaN	4	10	NaN	NaN	0	10	14
184	'>gi|386642862|ref|NP_001245367.1| threonine--tRNA ligase, cytoplasmic isoform 2 [Homo sapiens]'	NaN	NaN	NaN	10	1	NaN	NaN	NaN	0	10	11
185	'>gi|55956788|ref|NP_005372.2| nucleolin [Homo sapiens]'	NaN	NaN	NaN	10	1	NaN	NaN	NaN	0	10	11
186	'>gi|109148539|ref|NP_821158.2| gamma-glutamyltransferase 7 [Homo sapiens]'	NaN	NaN	NaN	10	NaN	NaN	NaN	NaN	0	10	10
187	'>gi|148612818|ref|NP_001091982.1| cGMP-dependent protein kinase 1 isoform 1 [Homo sapiens]'	NaN	NaN	NaN	NaN	NaN	NaN	NaN	10	0	10	10
188	'>gi|218749883|ref|NP_057303.2| endoplasmic reticulum mannosyl-oligosaccharide 1,2-alpha-mannosidase [Homo sapiens]'	NaN	NaN	NaN	10	NaN	NaN	NaN	NaN	0	10	10
189	'>gi|4503481|ref|NP_001395.1| elongation factor 1-gamma [Homo sapiens]'	NaN	NaN	NaN	NaN	10	NaN	NaN	NaN	0	10	10
190	'>gi|544063461|ref|NP_001269550.1| membrane-associated progesterone receptor component 1 isoform 2 [Homo sapiens]'	NaN	NaN	NaN	NaN	NaN	10	NaN	NaN	0	10	10
191	'>gi|612339310|ref|NP_056197.3| E3 ubiquitin-protein ligase HECTD1 [Homo sapiens]'	NaN	10	NaN	NaN	NaN	NaN	NaN	NaN	0	10	10
192	'>gi|83267868|ref|NP_001032584.1| dynein light chain 1, cytoplasmic [Homo sapiens]'	NaN	NaN	NaN	NaN	NaN	NaN	10	NaN	0	10	10
193	'>gi|94721239|ref|NP_038203.2| isoleucine--tRNA ligase, cytoplasmic [Homo sapiens]'	NaN	NaN	10	NaN	NaN	NaN	NaN	NaN	0	10	10
194	'>gi|6912286|ref|NP_036246.1| caspase-14 precursor [Homo sapiens]'	8	5	9	3	NaN	7	NaN	4	0	9	36
195	'>gi|578835525|ref|XP_006723678.1| PREDICTED: protein-glutamine gamma-glutamyltransferase E isoform X1 [Homo sapiens]'	3	3	9	6	2	4	2	2	0	9	31
196	'>gi|4505821|ref|NP_002643.1| prolactin-inducible protein precursor [Homo sapiens]'	2	NaN	2	1	NaN	9	3	3	0	9	20
197	'>gi|428977337|ref|NP_001258803.1| protein AAR2 homolog [Homo sapiens]'	NaN	NaN	NaN	NaN	9	6	NaN	NaN	0	9	15
198	'''>gi|511630715|ref|NP_001265432.1| dolichyl-diphosphooligosaccharide--protein glycosyltransferase subunit STT3A isoform a [Homo s...'' <Preview truncated at 128 characters>'	NaN	NaN	NaN	3	9	NaN	NaN	NaN	0	9	12
199	'>gi|23308577|ref|NP_006614.2| D-3-phosphoglycerate dehydrogenase [Homo sapiens]'	NaN	NaN	NaN	1	9	NaN	NaN	NaN	0	9	10
200	'>gi|5803227|ref|NP_006817.1| 14-3-3 protein theta [Homo sapiens]'	NaN	NaN	NaN	NaN	1	9	NaN	NaN	0	9	10
201	'>gi|109150431|ref|NP_060469.4| E3 ubiquitin-protein ligase RNF31 [Homo sapiens]'	NaN	NaN	9	NaN	NaN	NaN	NaN	NaN	0	9	9
202	'>gi|14389309|ref|NP_116093.1| tubulin alpha-1C chain [Homo sapiens]'	NaN	NaN	NaN	NaN	9	NaN	NaN	NaN	0	9	9
203	'>gi|154354966|ref|NP_001093640.1| mitochondrial inner membrane protein isoform 3 [Homo sapiens]'	NaN	NaN	NaN	9	NaN	NaN	NaN	NaN	0	9	9
204	'>gi|164607124|ref|NP_001106849.1| Fanconi anemia group I protein isoform 1 [Homo sapiens]'	NaN	NaN	9	NaN	NaN	NaN	NaN	NaN	0	9	9
205	'>gi|194578888|ref|NP_001124147.1| calmegin precursor [Homo sapiens]'	NaN	NaN	NaN	9	NaN	NaN	NaN	NaN	0	9	9
206	'>gi|281182727|ref|NP_001162582.1| protein SCO2 homolog, mitochondrial precursor [Homo sapiens]'	NaN	NaN	NaN	NaN	NaN	9	NaN	NaN	0	9	9
207	'>gi|33469968|ref|NP_005907.3| DNA replication licensing factor MCM7 isoform 1 [Homo sapiens]'	NaN	NaN	NaN	9	NaN	NaN	NaN	NaN	0	9	9
208	'>gi|355594753|ref|NP_001822.3| clusterin preproprotein [Homo sapiens]'	NaN	NaN	NaN	NaN	NaN	9	NaN	NaN	0	9	9
209	'>gi|47458811|ref|NP_998814.1| sideroflexin-4 [Homo sapiens]'	NaN	NaN	NaN	NaN	NaN	9	NaN	NaN	0	9	9
210	'>gi|545478189|ref|NP_001269913.1| FERM, RhoGEF and pleckstrin domain-containing protein 2 isoform c [Homo sapiens]'	NaN	NaN	NaN	9	NaN	NaN	NaN	NaN	0	9	9
211	'>gi|5802984|ref|NP_006867.1| N-acetyllactosaminide beta-1,3-N-acetylglucosaminyltransferase [Homo sapiens]'	NaN	NaN	NaN	NaN	9	NaN	NaN	NaN	0	9	9
212	'>gi|58761484|ref|NP_001008800.1| T-complex protein 1 subunit gamma isoform c [Homo sapiens]'	NaN	NaN	NaN	9	NaN	NaN	NaN	NaN	0	9	9
213	'>gi|21614544|ref|NP_002955.2| protein S100-A8 [Homo sapiens]'	5	2	NaN	8	NaN	4	3	NaN	0	8	22
214	'>gi|219879806|ref|NP_001137378.1| TRAF-type zinc finger domain-containing protein 1 [Homo sapiens]'	NaN	NaN	NaN	8	7	NaN	NaN	NaN	0	8	15
215	'>gi|225543215|ref|NP_001139438.1| antigen KI-67 isoform 2 [Homo sapiens]'	NaN	7	8	NaN	NaN	NaN	NaN	NaN	0	8	15
216	'>gi|24234688|ref|NP_004125.3| stress-70 protein, mitochondrial precursor [Homo sapiens]'	NaN	NaN	NaN	8	6	NaN	NaN	NaN	0	8	14
217	'>gi|4502163|ref|NP_001638.1| apolipoprotein D precursor [Homo sapiens]'	3	2	NaN	NaN	NaN	8	NaN	1	0	8	14
218	'>gi|7661968|ref|NP_055481.1| clathrin interactor 1 isoform 2 [Homo sapiens]'	NaN	NaN	NaN	8	6	NaN	NaN	NaN	0	8	14
219	'>gi|21327701|ref|NP_631961.1| TATA-binding protein-associated factor 2N isoform 1 [Homo sapiens]'	NaN	NaN	NaN	8	5	NaN	NaN	NaN	0	8	13
220	'>gi|281604138|ref|NP_001164015.1| serine/threonine-protein phosphatase PGAM5, mitochondrial isoform 2 [Homo sapiens]'	NaN	NaN	NaN	NaN	5	8	NaN	NaN	0	8	13
221	'>gi|14210536|ref|NP_115914.1| tubulin beta-6 chain [Homo sapiens]'	1	NaN	NaN	1	8	1	NaN	NaN	0	8	11
222	'>gi|42734503|ref|NP_976240.1| caprin-1 isoform 2 [Homo sapiens]'	NaN	NaN	3	8	NaN	NaN	NaN	NaN	0	8	11
223	'>gi|50592994|ref|NP_003320.2| thioredoxin isoform 1 [Homo sapiens]'	NaN	NaN	NaN	NaN	NaN	2	8	1	0	8	11
224	'>gi|154350241|ref|NP_065073.3| brefeldin A-inhibited guanine nucleotide-exchange protein 3 [Homo sapiens]'	NaN	8	2	NaN	NaN	NaN	NaN	NaN	0	8	10
225	'>gi|38327552|ref|NP_938405.1| ras GTPase-activating protein-binding protein 1 [Homo sapiens]'	NaN	NaN	NaN	2	8	NaN	NaN	NaN	0	8	10
226	'>gi|4502101|ref|NP_000691.1| annexin A1 [Homo sapiens]'	NaN	NaN	NaN	2	NaN	8	NaN	NaN	0	8	10
227	'>gi|24234683|ref|NP_004642.2| ubiquitin carboxyl-terminal hydrolase 11 [Homo sapiens]'	NaN	NaN	1	8	NaN	NaN	NaN	NaN	0	8	9
228	'>gi|254553334|ref|NP_001156956.1| DDB1- and CUL4-associated factor 11 isoform 1 [Homo sapiens]'	NaN	NaN	NaN	1	8	NaN	NaN	NaN	0	8	9
229	'>gi|4503143|ref|NP_001900.1| cathepsin D preproprotein [Homo sapiens]'	NaN	NaN	NaN	NaN	NaN	8	NaN	1	0	8	9
230	'>gi|5031863|ref|NP_005558.1| galectin-3-binding protein precursor [Homo sapiens]'	NaN	NaN	NaN	8	1	NaN	NaN	NaN	0	8	9
231	'>gi|157388965|ref|NP_689483.3| schlafen family member 11 [Homo sapiens]'	NaN	NaN	NaN	8	NaN	NaN	NaN	NaN	0	8	8
232	'>gi|19920317|ref|NP_006816.2| cytoskeleton-associated protein 4 [Homo sapiens]'	NaN	NaN	NaN	NaN	8	NaN	NaN	NaN	0	8	8
233	'>gi|221307568|ref|NP_001138295.1| C-myc promoter-binding protein isoform 1 [Homo sapiens]'	NaN	NaN	8	NaN	NaN	NaN	NaN	NaN	0	8	8
234	'>gi|224831257|ref|NP_055467.3| importin-13 [Homo sapiens]'	NaN	NaN	NaN	8	NaN	NaN	NaN	NaN	0	8	8
235	'>gi|4506209|ref|NP_002794.1| 26S protease regulatory subunit 7 isoform 1 [Homo sapiens]'	NaN	NaN	NaN	NaN	8	NaN	NaN	NaN	0	8	8
236	'>gi|4758340|ref|NP_004452.1| phenylalanine--tRNA ligase alpha subunit [Homo sapiens]'	NaN	NaN	NaN	NaN	8	NaN	NaN	NaN	0	8	8
237	'>gi|4759068|ref|NP_004580.1| protein SCO1 homolog, mitochondrial [Homo sapiens]'	NaN	NaN	NaN	NaN	NaN	8	NaN	NaN	0	8	8
238	'>gi|4826908|ref|NP_005018.1| phosphatidylinositol 3-kinase regulatory subunit beta [Homo sapiens]'	NaN	NaN	NaN	8	NaN	NaN	NaN	NaN	0	8	8
239	'>gi|530362743|ref|XP_005270979.1| PREDICTED: protein Hook homolog 1 isoform X1 [Homo sapiens]'	NaN	NaN	NaN	8	NaN	NaN	NaN	NaN	0	8	8
240	'>gi|6005824|ref|NP_009121.1| SEC23-interacting protein [Homo sapiens]'	NaN	NaN	8	NaN	NaN	NaN	NaN	NaN	0	8	8
241	'>gi|8922532|ref|NP_060615.1| regulator of microtubule dynamics protein 3 [Homo sapiens]'	NaN	NaN	NaN	NaN	8	NaN	NaN	NaN	0	8	8
242	'>gi|33239451|ref|NP_872590.1| proliferating cell nuclear antigen [Homo sapiens]'	NaN	NaN	NaN	NaN	1	5	7	NaN	0	7	13
243	'''>gi|530414178|ref|XP_005266746.1| PREDICTED: mitochondrial import inner membrane translocase subunit Tim21 isoform X1 [Homo sapi...'' <Preview truncated at 128 characters>'	NaN	NaN	NaN	NaN	NaN	7	6	NaN	0	7	13
244	'>gi|156071462|ref|NP_001627.2| ADP/ATP translocase 3 [Homo sapiens]'	1	NaN	2	NaN	2	7	NaN	NaN	0	7	12
245	'>gi|157384998|ref|NP_002325.2| low-density lipoprotein receptor-related protein 4 precursor [Homo sapiens]'	NaN	5	7	NaN	NaN	NaN	NaN	NaN	0	7	12
246	'>gi|37693993|ref|NP_002504.2| nucleoside diphosphate kinase 3 precursor [Homo sapiens]'	NaN	NaN	NaN	NaN	NaN	5	7	NaN	0	7	12
247	'>gi|201860300|ref|NP_003968.2| AH receptor-interacting protein [Homo sapiens]'	NaN	NaN	NaN	1	3	7	NaN	NaN	0	7	11
248	'>gi|38202257|ref|NP_938148.1| neutral alpha-glucosidase AB isoform 2 precursor [Homo sapiens]'	NaN	NaN	4	7	NaN	NaN	NaN	NaN	0	7	11
249	'>gi|224586884|ref|NP_001138898.1| Y-box-binding protein 3 isoform b [Homo sapiens]'	NaN	NaN	NaN	3	7	NaN	NaN	NaN	0	7	10
250	'>gi|4506195|ref|NP_002785.1| proteasome subunit beta type-2 isoform 1 [Homo sapiens]'	NaN	NaN	NaN	NaN	NaN	3	7	NaN	0	7	10
251	'>gi|197304786|ref|NP_001127854.1| IQ motif and SEC7 domain-containing protein 1 isoform a [Homo sapiens]'	NaN	NaN	7	2	NaN	NaN	NaN	NaN	0	7	9
252	'>gi|354983495|ref|NP_001238979.1| protein-L-isoaspartate(D-aspartate) O-methyltransferase isoform 3 [Homo sapiens]'	NaN	NaN	NaN	NaN	7	2	NaN	NaN	0	7	9
253	'>gi|50345988|ref|NP_001001973.1| ATP synthase subunit gamma, mitochondrial isoform L (liver) precursor [Homo sapiens]'	NaN	NaN	NaN	NaN	2	7	NaN	NaN	0	7	9
254	'>gi|9966881|ref|NP_065134.1| nuclear pore complex protein Nup107 [Homo sapiens]'	NaN	NaN	2	7	NaN	NaN	NaN	NaN	0	7	9
255	'>gi|4885487|ref|NP_005430.1| myeloid leukemia factor 2 [Homo sapiens]'	NaN	NaN	NaN	NaN	1	7	NaN	NaN	0	7	8
256	'>gi|145580631|ref|NP_859052.3| sulfhydryl oxidase 2 precursor [Homo sapiens]'	NaN	NaN	NaN	7	NaN	NaN	NaN	NaN	0	7	7
257	'>gi|156523968|ref|NP_001609.2| poly [ADP-ribose] polymerase 1 [Homo sapiens]'	NaN	NaN	7	NaN	NaN	NaN	NaN	NaN	0	7	7
258	'>gi|193083110|ref|NP_001122384.1| poly(rC)-binding protein 2 isoform e [Homo sapiens]'	NaN	NaN	NaN	NaN	NaN	7	NaN	NaN	0	7	7
259	'>gi|209954811|ref|NP_001129628.1| zinc finger protein 507 [Homo sapiens]'	NaN	NaN	7	NaN	NaN	NaN	NaN	NaN	0	7	7
260	'>gi|254692934|ref|NP_001157108.1| general transcription factor II-I isoform 5 [Homo sapiens]'	NaN	NaN	7	NaN	NaN	NaN	NaN	NaN	0	7	7
261	'>gi|324021738|ref|NP_001191230.1| amyloid beta A4 protein isoform h precursor [Homo sapiens]'	NaN	NaN	7	NaN	NaN	NaN	NaN	NaN	0	7	7
262	'>gi|38569394|ref|NP_003631.2| elongator complex protein 1 [Homo sapiens]'	NaN	NaN	7	NaN	NaN	NaN	NaN	NaN	0	7	7
263	'>gi|386869503|ref|NP_001247435.1| 40S ribosomal protein S3 isoform 2 [Homo sapiens]'	NaN	NaN	NaN	NaN	NaN	7	NaN	NaN	0	7	7
264	'>gi|40807482|ref|NP_149974.2| BPI fold-containing family B member 1 precursor [Homo sapiens]'	NaN	NaN	NaN	7	NaN	NaN	NaN	NaN	0	7	7
265	'>gi|4502167|ref|NP_000475.1| amyloid beta A4 protein isoform a precursor [Homo sapiens]'	NaN	NaN	NaN	7	NaN	NaN	NaN	NaN	0	7	7
266	'>gi|4507401|ref|NP_003192.1| transcription factor A, mitochondrial isoform 1 precursor [Homo sapiens]'	NaN	NaN	NaN	NaN	NaN	7	NaN	NaN	0	7	7
267	'>gi|4885399|ref|NP_005436.1| structural maintenance of chromosomes protein 3 [Homo sapiens]'	NaN	NaN	7	NaN	NaN	NaN	NaN	NaN	0	7	7
268	'>gi|527317371|ref|NP_001268392.1| structural maintenance of chromosomes protein 1A isoform 2 [Homo sapiens]'	NaN	NaN	7	NaN	NaN	NaN	NaN	NaN	0	7	7
269	'>gi|62241042|ref|NP_004437.2| bifunctional glutamate/proline--tRNA ligase [Homo sapiens]'	NaN	NaN	7	NaN	NaN	NaN	NaN	NaN	0	7	7
270	'>gi|66472382|ref|NP_009115.2| nischarin isoform 1 [Homo sapiens]'	NaN	NaN	7	NaN	NaN	NaN	NaN	NaN	0	7	7
271	'>gi|67782356|ref|NP_001255.3| corneodesmosin precursor [Homo sapiens]'	6	5	4	4	3	5	4	3	0	6	34
272	'>gi|13435361|ref|NP_077739.1| desmocollin-1 isoform Dsc1a preproprotein [Homo sapiens]'	3	3	6	5	3	5	3	3	0	6	31
273	'>gi|60097902|ref|NP_002007.1| filaggrin [Homo sapiens]'	4	3	4	5	NaN	6	5	1	0	6	28
274	'>gi|50845388|ref|NP_001002858.1| annexin A2 isoform 1 [Homo sapiens]'	4	6	5	3	1	5	2	NaN	0	6	26
275	'>gi|77539758|ref|NP_001029249.1| histone H4 [Homo sapiens]'	3	1	NaN	3	NaN	6	2	2	0	6	17
276	'>gi|381342476|ref|NP_001244222.1| heterogeneous nuclear ribonucleoprotein H [Homo sapiens]'	NaN	3	1	6	NaN	2	3	NaN	0	6	15
277	'>gi|612407827|ref|NP_055186.3| A-kinase anchor protein 8-like isoform 1 [Homo sapiens]'	NaN	NaN	4	3	6	NaN	NaN	NaN	0	6	13
278	'>gi|291621647|ref|NP_006311.2| membrane-associated progesterone receptor component 2 [Homo sapiens]'	NaN	NaN	NaN	NaN	NaN	5	6	NaN	0	6	11
279	'>gi|4505255|ref|NP_002433.1| RNA-binding protein Musashi homolog 1 [Homo sapiens]'	NaN	NaN	NaN	NaN	5	6	NaN	NaN	0	6	11
280	'>gi|4557894|ref|NP_000230.1| lysozyme C precursor [Homo sapiens]'	1	1	NaN	6	NaN	NaN	2	1	0	6	11
281	'>gi|169404009|ref|NP_003135.2| translocon-associated protein subunit alpha isoform 1 precursor [Homo sapiens]'	NaN	NaN	NaN	1	3	6	NaN	NaN	0	6	10
282	'>gi|251831110|ref|YP_003024029.1| cytochrome c oxidase subunit II (mitochondrion) [Homo sapiens]'	NaN	NaN	NaN	NaN	NaN	4	6	NaN	0	6	10
283	'>gi|41350216|ref|NP_061982.3| chitobiosyldiphosphodolichol beta-mannosyltransferase [Homo sapiens]'	NaN	NaN	NaN	NaN	6	4	NaN	NaN	0	6	10
284	'>gi|10835063|ref|NP_002511.1| nucleophosmin isoform 1 [Homo sapiens]'	3	NaN	NaN	NaN	NaN	6	NaN	NaN	0	6	9
285	'>gi|526253066|ref|NP_001268223.1| zinc finger protein 281 isoform 2 [Homo sapiens]'	NaN	NaN	3	6	NaN	NaN	NaN	NaN	0	6	9
286	'>gi|24475816|ref|NP_612510.1| very-long-chain enoyl-CoA reductase [Homo sapiens]'	NaN	NaN	NaN	NaN	1	6	1	NaN	0	6	8
287	'>gi|30089954|ref|NP_056541.2| DDB1- and CUL4-associated factor 8 [Homo sapiens]'	NaN	NaN	NaN	2	6	NaN	NaN	NaN	0	6	8
288	'>gi|31881785|ref|NP_079023.2| Hermansky-Pudlak syndrome 6 protein [Homo sapiens]'	NaN	NaN	NaN	6	2	NaN	NaN	NaN	0	6	8
289	'>gi|4827067|ref|NP_005087.1| zinc finger MYM-type protein 3 isoform 1 [Homo sapiens]'	NaN	NaN	6	2	NaN	NaN	NaN	NaN	0	6	8
290	'>gi|94536866|ref|NP_660295.2| zymogen granule protein 16 homolog B precursor [Homo sapiens]'	NaN	NaN	NaN	2	NaN	6	NaN	NaN	0	6	8
291	'>gi|108936958|ref|NP_005819.3| DDB1- and CUL4-associated factor 7 [Homo sapiens]'	NaN	NaN	NaN	NaN	1	6	NaN	NaN	0	6	7
292	'>gi|21327708|ref|NP_631946.1| nucleosome assembly protein 1-like 1 [Homo sapiens]'	NaN	NaN	NaN	1	6	NaN	NaN	NaN	0	6	7
293	'>gi|4506711|ref|NP_001021.1| 40S ribosomal protein S27 [Homo sapiens]'	NaN	NaN	NaN	NaN	NaN	1	6	NaN	0	6	7
294	'>gi|54112121|ref|NP_036558.3| splicing factor 3B subunit 3 [Homo sapiens]'	NaN	1	6	NaN	NaN	NaN	NaN	NaN	0	6	7
295	'>gi|145580595|ref|NP_689762.2| coiled-coil domain-containing protein 112 isoform 2 [Homo sapiens]'	NaN	NaN	NaN	NaN	6	NaN	NaN	NaN	0	6	6
296	'>gi|154355000|ref|NP_003676.2| far upstream element-binding protein 2 [Homo sapiens]'	NaN	NaN	NaN	6	NaN	NaN	NaN	NaN	0	6	6
297	'>gi|156104872|ref|NP_006485.2| ETS domain-containing transcription factor ERF isoform 1 [Homo sapiens]'	NaN	NaN	NaN	6	NaN	NaN	NaN	NaN	0	6	6
298	'>gi|156938331|ref|NP_060392.3| pre-mRNA-processing factor 39 [Homo sapiens]'	NaN	NaN	NaN	6	NaN	NaN	NaN	NaN	0	6	6
299	'>gi|157311635|ref|NP_940890.3| protein FAM83H [Homo sapiens]'	NaN	NaN	6	NaN	NaN	NaN	NaN	NaN	0	6	6
300	'>gi|166295173|ref|NP_060710.3| kin of IRRE-like protein 1 isoform 1 precursor [Homo sapiens]'	NaN	NaN	NaN	6	NaN	NaN	NaN	NaN	0	6	6
301	'>gi|169790923|ref|NP_000245.2| methionine synthase isoform 1 [Homo sapiens]'	NaN	NaN	6	NaN	NaN	NaN	NaN	NaN	0	6	6
302	'>gi|182508169|ref|NP_003864.4| neuropilin-1 isoform a precursor [Homo sapiens]'	NaN	NaN	6	NaN	NaN	NaN	NaN	NaN	0	6	6
303	'>gi|183603929|ref|NP_001116827.1| serine/threonine-protein phosphatase 6 catalytic subunit isoform a [Homo sapiens]'	NaN	NaN	NaN	NaN	NaN	6	NaN	NaN	0	6	6
304	'>gi|21359867|ref|NP_001907.2| cytochrome c1, heme protein, mitochondrial precursor [Homo sapiens]'	NaN	NaN	NaN	NaN	NaN	6	NaN	NaN	0	6	6
305	'>gi|215490089|ref|NP_005861.2| histone deacetylase complex subunit SAP18 [Homo sapiens]'	NaN	NaN	NaN	NaN	NaN	6	NaN	NaN	0	6	6
306	'>gi|24308324|ref|NP_115604.1| fatty acyl-CoA reductase 1 [Homo sapiens]'	NaN	NaN	NaN	NaN	6	NaN	NaN	NaN	0	6	6
307	'>gi|24430139|ref|NP_056355.2| RNA polymerase II-associated protein 1 [Homo sapiens]'	NaN	NaN	6	NaN	NaN	NaN	NaN	NaN	0	6	6
308	'>gi|24497453|ref|NP_002523.2| nuclear pore complex protein Nup88 [Homo sapiens]'	NaN	NaN	NaN	6	NaN	NaN	NaN	NaN	0	6	6
309	'>gi|25777602|ref|NP_002799.3| 26S proteasome non-ATPase regulatory subunit 2 isoform 1 [Homo sapiens]'	NaN	NaN	NaN	6	NaN	NaN	NaN	NaN	0	6	6
310	'>gi|260763955|ref|NP_057049.5| NADH dehydrogenase [ubiquinone] 1 alpha subcomplex subunit 13 [Homo sapiens]'	NaN	NaN	NaN	NaN	NaN	NaN	6	NaN	0	6	6
311	'>gi|262206280|ref|NP_003306.3| dnaJ homolog subfamily C member 7 isoform 1 [Homo sapiens]'	NaN	NaN	NaN	NaN	6	NaN	NaN	NaN	0	6	6
312	'>gi|266453768|ref|NP_001160160.1| ATP-dependent 6-phosphofructokinase, muscle type isoform 2 [Homo sapiens]'	NaN	NaN	NaN	6	NaN	NaN	NaN	NaN	0	6	6
313	'>gi|312836798|ref|NP_001186125.1| armadillo repeat-containing protein 6 isoform 1 [Homo sapiens]'	NaN	NaN	NaN	NaN	6	NaN	NaN	NaN	0	6	6
314	'>gi|327365361|ref|NP_056288.2| HEAT repeat-containing protein 5A [Homo sapiens]'	NaN	NaN	NaN	NaN	NaN	NaN	6	NaN	0	6	6
315	'>gi|33188445|ref|NP_036222.3| microtubule-actin cross-linking factor 1 [Homo sapiens]'	6	NaN	NaN	NaN	NaN	NaN	NaN	NaN	0	6	6
316	'>gi|33354281|ref|NP_877499.1| sodium-dependent neutral amino acid transporter B(0)AT2 isoform 1 [Homo sapiens]'	NaN	NaN	NaN	6	NaN	NaN	NaN	NaN	0	6	6
317	'>gi|390608669|ref|NP_001254629.1| prohibitin-2 isoform 3 [Homo sapiens]'	NaN	NaN	NaN	NaN	NaN	6	NaN	NaN	0	6	6
318	'>gi|39995082|ref|NP_060225.4| tRNA (cytosine(34)-C(5))-methyltransferase isoform 1 [Homo sapiens]'	NaN	NaN	NaN	6	NaN	NaN	NaN	NaN	0	6	6
319	'>gi|40254446|ref|NP_003469.2| cullin-5 [Homo sapiens]'	NaN	NaN	NaN	6	NaN	NaN	NaN	NaN	0	6	6
320	'>gi|4503363|ref|NP_003850.1| dolichol-phosphate mannosyltransferase subunit 1 [Homo sapiens]'	NaN	NaN	NaN	NaN	NaN	6	NaN	NaN	0	6	6
321	'>gi|4505211|ref|NP_002419.1| matrix metalloproteinase-15 preproprotein [Homo sapiens]'	NaN	NaN	NaN	NaN	6	NaN	NaN	NaN	0	6	6
322	'>gi|4507873|ref|NP_003363.1| prefoldin subunit 3 [Homo sapiens]'	NaN	NaN	NaN	NaN	NaN	6	NaN	NaN	0	6	6
323	'>gi|46519147|ref|NP_060217.1| ankyrin repeat and KH domain-containing protein 1 isoform 1 [Homo sapiens]'	NaN	6	NaN	NaN	NaN	NaN	NaN	NaN	0	6	6
324	'''>gi|4758786|ref|NP_004541.1| NADH dehydrogenase [ubiquinone] iron-sulfur protein 2, mitochondrial isoform 1 precursor [Homo sapi...'' <Preview truncated at 128 characters>'	NaN	NaN	NaN	NaN	6	NaN	NaN	NaN	0	6	6
325	'>gi|530388540|ref|XP_005251347.1| PREDICTED: transcription elongation factor B polypeptide 1 isoform X1 [Homo sapiens]'	NaN	NaN	NaN	NaN	NaN	NaN	6	NaN	0	6	6
326	'>gi|530420483|ref|XP_005261850.1| PREDICTED: uncharacterized protein KIAA1671 isoform X1 [Homo sapiens]'	NaN	NaN	6	NaN	NaN	NaN	NaN	NaN	0	6	6
327	'>gi|5453690|ref|NP_006136.1| dnaJ homolog subfamily B member 1 isoform 1 [Homo sapiens]'	NaN	NaN	NaN	NaN	6	NaN	NaN	NaN	0	6	6
328	'>gi|5454084|ref|NP_006406.1| serine palmitoyltransferase 1 isoform a [Homo sapiens]'	NaN	NaN	NaN	NaN	6	NaN	NaN	NaN	0	6	6
329	'>gi|568215065|ref|NP_001274745.1| ubiquitin-associated protein 2-like isoform d [Homo sapiens]'	NaN	NaN	6	NaN	NaN	NaN	NaN	NaN	0	6	6
330	'>gi|57222565|ref|NP_001009552.1| serine/threonine-protein phosphatase 2A catalytic subunit beta isoform [Homo sapiens]'	NaN	NaN	NaN	NaN	NaN	6	NaN	NaN	0	6	6
331	'>gi|578832148|ref|XP_006722395.1| PREDICTED: centrosomal protein of 192 kDa isoform X12 [Homo sapiens]'	NaN	NaN	6	NaN	NaN	NaN	NaN	NaN	0	6	6
332	'>gi|578834927|ref|XP_006723457.1| PREDICTED: uncharacterized aarF domain-containing protein kinase 4 isoform X8 [Homo sapiens]'	NaN	NaN	NaN	NaN	6	NaN	NaN	NaN	0	6	6
333	'>gi|7657508|ref|NP_055063.1| E3 ubiquitin-protein ligase RBX1 [Homo sapiens]'	NaN	NaN	NaN	NaN	NaN	NaN	6	NaN	0	6	6
334	'>gi|88759348|ref|NP_078822.3| RING finger protein 219 [Homo sapiens]'	NaN	NaN	NaN	6	NaN	NaN	NaN	NaN	0	6	6
335	'>gi|88900507|ref|NP_001034708.1| protein arginine N-methyltransferase 5 isoform b [Homo sapiens]'	NaN	NaN	NaN	NaN	6	NaN	NaN	NaN	0	6	6
336	'>gi|17998551|ref|NP_536722.1| serpin B12 [Homo sapiens]'	3	5	4	3	3	5	1	4	0	5	28
337	'>gi|346986435|ref|NP_001231367.1| arginase-1 isoform 1 [Homo sapiens]'	3	4	3	3	NaN	5	4	5	0	5	27
338	'>gi|4557014|ref|NP_001743.1| catalase [Homo sapiens]'	4	5	4	2	NaN	4	NaN	4	0	5	23
339	'>gi|258613943|ref|NP_001158222.1| aspartyl/asparaginyl beta-hydroxylase isoform f [Homo sapiens]'	NaN	NaN	4	5	4	NaN	NaN	NaN	0	5	13
340	'>gi|148539848|ref|NP_077741.2| desmocollin-3 isoform Dsc3b preproprotein [Homo sapiens]'	3	NaN	5	3	NaN	NaN	NaN	1	0	5	12
341	'>gi|24797067|ref|NP_002107.3| HLA class I histocompatibility antigen, A-1 alpha chain precursor [Homo sapiens]'	NaN	NaN	NaN	2	4	5	NaN	NaN	0	5	11
342	'>gi|29171705|ref|NP_803182.1| melanoma-associated antigen D2 [Homo sapiens]'	NaN	NaN	NaN	5	5	NaN	NaN	NaN	0	5	10
343	'>gi|31377562|ref|NP_060115.3| HAUS augmin-like complex subunit 6 isoform 1 [Homo sapiens]'	NaN	NaN	5	5	NaN	NaN	NaN	NaN	0	5	10
344	'>gi|325301078|ref|NP_001191456.1| translocon-associated protein subunit delta isoform 3 precursor [Homo sapiens]'	NaN	NaN	NaN	NaN	1	5	4	NaN	0	5	10
345	'>gi|14043070|ref|NP_112420.1| heterogeneous nuclear ribonucleoprotein A1 isoform b [Homo sapiens]'	NaN	NaN	NaN	NaN	4	5	NaN	NaN	0	5	9
346	'>gi|217330646|ref|NP_006704.3| activated RNA polymerase II transcriptional coactivator p15 [Homo sapiens]'	NaN	NaN	NaN	NaN	NaN	4	5	NaN	0	5	9
347	'>gi|557357733|ref|NP_001273433.1| heat shock protein 105 kDa isoform 3 [Homo sapiens]'	NaN	NaN	4	5	NaN	NaN	NaN	NaN	0	5	9
348	'>gi|53829376|ref|NP_001005476.1| plakophilin-4 isoform b [Homo sapiens]'	NaN	NaN	5	3	NaN	NaN	NaN	NaN	0	5	8
349	'>gi|149944680|ref|NP_056117.1| HAUS augmin-like complex subunit 5 [Homo sapiens]'	NaN	NaN	NaN	2	5	NaN	NaN	NaN	0	5	7
350	'>gi|153085470|ref|NP_001093139.1| HIG1 domain family member 1A, mitochondrial isoform b [Homo sapiens]'	NaN	NaN	NaN	NaN	NaN	2	5	NaN	0	5	7
351	'>gi|4506671|ref|NP_000995.1| 60S acidic ribosomal protein P2 [Homo sapiens]'	NaN	NaN	NaN	NaN	NaN	2	5	NaN	0	5	7
352	'>gi|5729875|ref|NP_006658.1| membrane-associated progesterone receptor component 1 isoform 1 [Homo sapiens]'	NaN	NaN	NaN	NaN	2	NaN	5	NaN	0	5	7
353	'>gi|7657369|ref|NP_055037.1| NADH dehydrogenase [ubiquinone] 1 alpha subcomplex subunit 8 [Homo sapiens]'	NaN	NaN	NaN	NaN	NaN	2	5	NaN	0	5	7
354	'>gi|108773787|ref|NP_000312.2| retinoblastoma-associated protein [Homo sapiens]'	NaN	NaN	NaN	5	1	NaN	NaN	NaN	0	5	6
355	'>gi|21361114|ref|NP_003553.2| mitochondrial 2-oxoglutarate/malate carrier protein isoform 1 [Homo sapiens]'	NaN	NaN	NaN	NaN	1	5	NaN	NaN	0	5	6
356	'>gi|296434287|ref|NP_001171809.1| protocadherin-19 isoform c precursor [Homo sapiens]'	NaN	NaN	5	1	NaN	NaN	NaN	NaN	0	5	6
357	'>gi|327315343|ref|NP_001192157.1| sortilin isoform 2 [Homo sapiens]'	NaN	NaN	1	5	NaN	NaN	NaN	NaN	0	5	6
358	'>gi|4504341|ref|NP_003633.1| histone acetyltransferase type B catalytic subunit [Homo sapiens]'	NaN	NaN	NaN	NaN	5	1	NaN	NaN	0	5	6
359	'>gi|4506695|ref|NP_001013.1| 40S ribosomal protein S19 [Homo sapiens]'	NaN	NaN	NaN	NaN	NaN	1	5	NaN	0	5	6
360	'>gi|5174447|ref|NP_006089.1| guanine nucleotide-binding protein subunit beta-2-like 1 [Homo sapiens]'	NaN	NaN	NaN	NaN	1	5	NaN	NaN	0	5	6
361	'>gi|52630342|ref|NP_002108.4| HLA class I histocompatibility antigen, Cw-1 alpha chain precursor [Homo sapiens]'	NaN	NaN	NaN	NaN	5	1	NaN	NaN	0	5	6
362	'>gi|9845502|ref|NP_002286.2| 40S ribosomal protein SA [Homo sapiens]'	NaN	NaN	NaN	NaN	5	1	NaN	NaN	0	5	6
363	'>gi|10835242|ref|NP_006249.1| cGMP-dependent protein kinase 1 isoform 2 [Homo sapiens]'	NaN	5	NaN	NaN	NaN	NaN	NaN	NaN	0	5	5
364	'>gi|110578649|ref|NP_065976.2| VWFA and cache domain-containing protein 1 isoform 1 [Homo sapiens]'	NaN	NaN	5	NaN	NaN	NaN	NaN	NaN	0	5	5
365	'>gi|12056465|ref|NP_001427.2| rRNA 2''-O-methyltransferase fibrillarin [Homo sapiens]'	NaN	NaN	NaN	NaN	NaN	5	NaN	NaN	0	5	5
366	'>gi|133925811|ref|NP_002261.3| transportin-1 isoform 1 [Homo sapiens]'	NaN	NaN	NaN	5	NaN	NaN	NaN	NaN	0	5	5
367	'>gi|14043022|ref|NP_004981.2| methionine--tRNA ligase, cytoplasmic [Homo sapiens]'	NaN	NaN	NaN	5	NaN	NaN	NaN	NaN	0	5	5
368	'>gi|14110420|ref|NP_112738.1| heterogeneous nuclear ribonucleoprotein D0 isoform a [Homo sapiens]'	NaN	NaN	NaN	NaN	5	NaN	NaN	NaN	0	5	5
369	'>gi|149999606|ref|NP_006293.2| mannosyl-oligosaccharide glucosidase isoform 1 [Homo sapiens]'	NaN	NaN	NaN	5	NaN	NaN	NaN	NaN	0	5	5
370	'>gi|150418002|ref|NP_002114.3| HLA class II histocompatibility antigen, DQ beta 1 chain isoform 1 precursor [Homo sapiens]'	NaN	NaN	NaN	NaN	NaN	5	NaN	NaN	0	5	5
371	'>gi|169790839|ref|NP_004163.3| excitatory amino acid transporter 1 isoform 1 [Homo sapiens]'	NaN	NaN	NaN	NaN	5	NaN	NaN	NaN	0	5	5
372	'>gi|19923669|ref|NP_005056.3| protein sel-1 homolog 1 isoform 1 precursor [Homo sapiens]'	NaN	NaN	NaN	5	NaN	NaN	NaN	NaN	0	5	5
373	'''>gi|209413738|ref|NP_001129243.1| dolichyl-diphosphooligosaccharide--protein glycosyltransferase subunit 2 isoform 2 precursor [...'' <Preview truncated at 128 characters>'	NaN	NaN	NaN	NaN	5	NaN	NaN	NaN	0	5	5
374	'>gi|21328448|ref|NP_647539.1| 14-3-3 protein beta/alpha [Homo sapiens]'	NaN	NaN	NaN	NaN	NaN	5	NaN	NaN	0	5	5
375	'>gi|21536320|ref|NP_653333.1| heterogeneous nuclear ribonucleoprotein U-like protein 1 isoform d [Homo sapiens]'	NaN	NaN	NaN	5	NaN	NaN	NaN	NaN	0	5	5
376	'>gi|22035554|ref|NP_663722.1| amyloid beta A4 precursor protein-binding family B member 1 isoform b [Homo sapiens]'	NaN	NaN	NaN	5	NaN	NaN	NaN	NaN	0	5	5
377	'>gi|22748937|ref|NP_065801.1| exportin-5 [Homo sapiens]'	NaN	NaN	5	NaN	NaN	NaN	NaN	NaN	0	5	5
378	'>gi|23308607|ref|NP_110416.1| minor histocompatibility antigen H13 isoform 1 [Homo sapiens]'	NaN	NaN	NaN	NaN	5	NaN	NaN	NaN	0	5	5
379	'>gi|24797106|ref|NP_055428.1| FAS-associated factor 2 [Homo sapiens]'	NaN	NaN	NaN	NaN	5	NaN	NaN	NaN	0	5	5
380	'>gi|299758464|ref|NP_001139685.2| TBC1 domain family member 15 isoform 3 [Homo sapiens]'	NaN	NaN	NaN	NaN	5	NaN	NaN	NaN	0	5	5
381	'>gi|31657129|ref|NP_036525.1| phosphoribosylformylglycinamidine synthase [Homo sapiens]'	NaN	NaN	5	NaN	NaN	NaN	NaN	NaN	0	5	5
382	'>gi|321267511|ref|NP_001189431.1| protein NipSnap homolog 1 isoform 2 [Homo sapiens]'	NaN	NaN	NaN	NaN	NaN	5	NaN	NaN	0	5	5
383	'>gi|33469919|ref|NP_005905.2| DNA replication licensing factor MCM4 [Homo sapiens]'	NaN	NaN	NaN	5	NaN	NaN	NaN	NaN	0	5	5
384	'>gi|33946327|ref|NP_005076.3| nuclear pore complex protein Nup214 [Homo sapiens]'	NaN	5	NaN	NaN	NaN	NaN	NaN	NaN	0	5	5
385	'>gi|342307069|ref|NP_001230122.1| BPI fold-containing family A member 1 precursor [Homo sapiens]'	NaN	NaN	NaN	5	NaN	NaN	NaN	NaN	0	5	5
386	'>gi|372622373|ref|NP_001243241.1| serine/threonine-protein kinase 3 isoform 2 [Homo sapiens]'	NaN	NaN	NaN	NaN	5	NaN	NaN	NaN	0	5	5
387	'>gi|392306969|ref|NP_001254711.1| activating molecule in BECN1-regulated autophagy protein 1 isoform 1 [Homo sapiens]'	NaN	NaN	5	NaN	NaN	NaN	NaN	NaN	0	5	5
388	'''>gi|41327781|ref|NP_951032.1| NADH dehydrogenase [ubiquinone] 1 alpha subcomplex assembly factor 3 isoform a precursor [Homo sap...'' <Preview truncated at 128 characters>'	NaN	NaN	NaN	NaN	NaN	NaN	5	NaN	0	5	5
389	'>gi|42734325|ref|NP_055860.1| wings apart-like protein homolog [Homo sapiens]'	NaN	NaN	5	NaN	NaN	NaN	NaN	NaN	0	5	5
390	'>gi|444299651|ref|NP_653091.3| protein CASC5 isoform 2 [Homo sapiens]'	NaN	NaN	5	NaN	NaN	NaN	NaN	NaN	0	5	5
391	'>gi|4502227|ref|NP_001168.1| ADP-ribosylation factor-like protein 1 isoform 1 [Homo sapiens]'	NaN	NaN	NaN	NaN	NaN	NaN	5	NaN	0	5	5
392	'>gi|4502491|ref|NP_001203.1| complement component 1 Q subcomponent-binding protein, mitochondrial precursor [Homo sapiens]'	NaN	NaN	NaN	NaN	NaN	5	NaN	NaN	0	5	5
393	'>gi|4503009|ref|NP_001864.1| carboxypeptidase E preproprotein [Homo sapiens]'	NaN	NaN	NaN	NaN	NaN	5	NaN	NaN	0	5	5
394	'>gi|4506091|ref|NP_002739.1| mitogen-activated protein kinase 6 [Homo sapiens]'	NaN	NaN	NaN	5	NaN	NaN	NaN	NaN	0	5	5
395	'>gi|4506605|ref|NP_000969.1| 60S ribosomal protein L23 [Homo sapiens]'	NaN	NaN	NaN	NaN	NaN	NaN	5	NaN	0	5	5
396	'>gi|50592988|ref|NP_003357.2| cytochrome b-c1 complex subunit 2, mitochondrial precursor [Homo sapiens]'	NaN	NaN	NaN	NaN	5	NaN	NaN	NaN	0	5	5
397	'>gi|52632379|ref|NP_001005332.1| melanoma-associated antigen D1 isoform b [Homo sapiens]'	NaN	NaN	NaN	5	NaN	NaN	NaN	NaN	0	5	5
398	'>gi|530389315|ref|XP_005251117.1| PREDICTED: 14-3-3 protein zeta/delta isoform X1 [Homo sapiens]'	NaN	NaN	NaN	NaN	NaN	5	NaN	NaN	0	5	5
399	'>gi|531990816|ref|NP_001269091.1| F-actin-capping protein subunit beta isoform 4 [Homo sapiens]'	NaN	NaN	NaN	NaN	NaN	5	NaN	NaN	0	5	5
400	'>gi|557440906|ref|NP_001273515.1| CDP-diacylglycerol--inositol 3-phosphatidyltransferase isoform 3 [Homo sapiens]'	NaN	NaN	NaN	NaN	NaN	5	NaN	NaN	0	5	5
401	'>gi|5729840|ref|NP_006650.1| gamma-tubulin complex component 2 isoform 2 [Homo sapiens]'	NaN	NaN	NaN	5	NaN	NaN	NaN	NaN	0	5	5
402	'>gi|57863271|ref|NP_055873.1| von Willebrand factor A domain-containing protein 8 isoform a precursor [Homo sapiens]'	NaN	NaN	5	NaN	NaN	NaN	NaN	NaN	0	5	5
403	'>gi|578833214|ref|XP_006722798.1| PREDICTED: dnaJ homolog subfamily B member 1 isoform X3 [Homo sapiens]'	NaN	NaN	NaN	NaN	NaN	5	NaN	NaN	0	5	5
404	'>gi|6005890|ref|NP_009039.1| transcription elongation factor B polypeptide 2 isoform a [Homo sapiens]'	NaN	NaN	NaN	NaN	NaN	NaN	5	NaN	0	5	5
405	'>gi|659667952|ref|NP_001281074.1| lupus La protein [Homo sapiens]'	NaN	NaN	NaN	NaN	5	NaN	NaN	NaN	0	5	5
406	'>gi|661567300|ref|NP_001281269.1| zinc finger CCCH domain-containing protein 18 isoform 1 [Homo sapiens]'	NaN	NaN	5	NaN	NaN	NaN	NaN	NaN	0	5	5
407	'>gi|66346679|ref|NP_001018077.1| plasminogen activator inhibitor 1 RNA-binding protein isoform 1 [Homo sapiens]'	NaN	NaN	NaN	NaN	5	NaN	NaN	NaN	0	5	5
408	'>gi|66932947|ref|NP_000005.2| alpha-2-macroglobulin precursor [Homo sapiens]'	NaN	NaN	5	NaN	NaN	NaN	NaN	NaN	0	5	5
409	'>gi|71483646|ref|NP_001025067.1| WD repeat domain phosphoinositide-interacting protein 4 isoform 2 [Homo sapiens]'	NaN	NaN	NaN	NaN	NaN	5	NaN	NaN	0	5	5
410	'>gi|73695475|ref|NP_060542.4| HEAT repeat-containing protein 1 [Homo sapiens]'	NaN	NaN	5	NaN	NaN	NaN	NaN	NaN	0	5	5
411	'>gi|91208418|ref|NP_001035095.1| transcription elongation regulator 1 isoform 2 [Homo sapiens]'	NaN	NaN	5	NaN	NaN	NaN	NaN	NaN	0	5	5
412	'>gi|4506773|ref|NP_002956.1| protein S100-A9 [Homo sapiens]'	1	4	3	4	1	4	4	NaN	0	4	21
413	'>gi|4885165|ref|NP_005204.1| cystatin-A [Homo sapiens]'	3	2	NaN	3	2	4	4	3	0	4	21
414	'>gi|320461711|ref|NP_001189360.1| peroxiredoxin-1 [Homo sapiens]'	2	NaN	1	NaN	2	2	4	3	0	4	14
415	'>gi|34419635|ref|NP_002146.2| heat shock 70 kDa protein 6 [Homo sapiens]'	1	1	1	4	4	1	2	NaN	0	4	14
416	'>RRV Gene 10'	NaN	4	NaN	1	NaN	1	2	4	0	4	12
417	'>gi|32189392|ref|NP_005800.3| peroxiredoxin-2 [Homo sapiens]'	NaN	NaN	4	3	NaN	3	2	NaN	0	4	12
418	'>gi|4557581|ref|NP_001435.1| fatty acid-binding protein, epidermal [Homo sapiens]'	NaN	NaN	4	NaN	NaN	2	3	1	0	4	10
419	'>gi|4504279|ref|NP_002098.1| histone H3.3 [Homo sapiens]'	NaN	NaN	NaN	2	NaN	3	4	NaN	0	4	9
420	'>gi|467094898|ref|NP_001264129.1| protein cornichon homolog 4 isoform 5 [Homo sapiens]'	NaN	NaN	NaN	NaN	NaN	2	4	3	0	4	9
421	'>gi|32189371|ref|NP_060945.2| transmembrane protein 165 precursor [Homo sapiens]'	NaN	NaN	NaN	NaN	4	4	NaN	NaN	0	4	8
422	'>gi|50592996|ref|NP_006077.2| tubulin beta-3 chain isoform 1 [Homo sapiens]'	1	NaN	NaN	1	4	2	NaN	NaN	0	4	8
423	'>gi|545478838|ref|NP_001269883.1| protein arginine N-methyltransferase 5 isoform d [Homo sapiens]'	1	2	NaN	1	NaN	NaN	NaN	4	0	4	8
424	'>gi|6005731|ref|NP_009167.1| calcineurin B homologous protein 1 [Homo sapiens]'	NaN	NaN	NaN	NaN	NaN	4	4	NaN	0	4	8
425	'>gi|150036268|ref|NP_004002.2| dystrophin Dp260-1 isoform [Homo sapiens]'	4	3	NaN	NaN	NaN	NaN	NaN	NaN	0	4	7
426	'>gi|156105681|ref|NP_036618.2| presenilin-2 isoform 2 [Homo sapiens]'	NaN	NaN	NaN	NaN	3	4	NaN	NaN	0	4	7
427	'>gi|217330616|ref|NP_001136099.1| protein transport protein Sec61 subunit alpha isoform 2 isoform c [Homo sapiens]'	NaN	NaN	NaN	NaN	4	3	NaN	NaN	0	4	7
428	'>gi|24308113|ref|NP_056449.1| KIF1-binding protein [Homo sapiens]'	NaN	NaN	NaN	3	4	NaN	NaN	NaN	0	4	7
429	'>gi|4502303|ref|NP_001688.1| ATP synthase subunit O, mitochondrial precursor [Homo sapiens]'	NaN	NaN	NaN	NaN	NaN	4	3	NaN	0	4	7
430	'>gi|5454122|ref|NP_006318.1| mitochondrial import inner membrane translocase subunit Tim23 [Homo sapiens]'	NaN	NaN	NaN	NaN	NaN	4	3	NaN	0	4	7
431	'>gi|58761544|ref|NP_001009999.1| lysine-specific histone demethylase 1A isoform a [Homo sapiens]'	NaN	NaN	3	4	NaN	NaN	NaN	NaN	0	4	7
432	'>gi|108773810|ref|NP_064502.9| leucine--tRNA ligase, cytoplasmic [Homo sapiens]'	NaN	NaN	4	NaN	NaN	NaN	2	NaN	0	4	6
433	'>gi|17158005|ref|NP_477521.1| mucin-like protein 1 precursor [Homo sapiens]'	1	NaN	NaN	NaN	NaN	4	NaN	1	0	4	6
434	'>gi|17388799|ref|NP_490647.1| dnaJ homolog subfamily B member 6 isoform a [Homo sapiens]'	NaN	NaN	NaN	NaN	2	4	NaN	NaN	0	4	6
435	'>gi|21389469|ref|NP_653237.1| mitochondrial intermembrane space import and assembly protein 40 isoform 2 [Homo sapiens]'	NaN	NaN	NaN	NaN	NaN	2	4	NaN	0	4	6
436	'>gi|24797086|ref|NP_002262.3| importin-5 [Homo sapiens]'	NaN	NaN	4	2	NaN	NaN	NaN	NaN	0	4	6
437	'>gi|307775422|ref|NP_001182732.1| low-density lipoprotein receptor isoform 6 precursor [Homo sapiens]'	NaN	NaN	4	2	NaN	NaN	NaN	NaN	0	4	6
438	'>gi|380837121|ref|NP_004883.3| vesicle-trafficking protein SEC22b precursor [Homo sapiens]'	NaN	NaN	NaN	NaN	NaN	4	2	NaN	0	4	6
439	'>gi|53759103|ref|NP_006381.2| importin-8 isoform 1 [Homo sapiens]'	NaN	NaN	2	4	NaN	NaN	NaN	NaN	0	4	6
440	'>gi|58331171|ref|NP_001009186.1| T-complex protein 1 subunit zeta isoform b [Homo sapiens]'	NaN	NaN	NaN	4	NaN	NaN	NaN	2	0	4	6
441	'>gi|115583685|ref|NP_003042.3| monocarboxylate transporter 1 [Homo sapiens]'	NaN	NaN	NaN	NaN	4	1	NaN	NaN	0	4	5
442	'>gi|190194386|ref|NP_064508.3| transmembrane 9 superfamily member 3 precursor [Homo sapiens]'	NaN	NaN	NaN	NaN	4	1	NaN	NaN	0	4	5
443	'>gi|222352151|ref|NP_006187.2| poly(rC)-binding protein 1 [Homo sapiens]'	NaN	NaN	NaN	NaN	4	1	NaN	NaN	0	4	5
444	'>gi|33239445|ref|NP_003742.2| eukaryotic translation initiation factor 3 subunit B [Homo sapiens]'	NaN	NaN	4	1	NaN	NaN	NaN	NaN	0	4	5
445	'>gi|44890068|ref|NP_005086.2| zinc finger MYM-type protein 4 [Homo sapiens]'	1	NaN	4	NaN	NaN	NaN	NaN	NaN	0	4	5
446	'>gi|528281421|ref|NP_001268463.1| band 4.1-like protein 3 isoform 3 [Homo sapiens]'	NaN	NaN	1	4	NaN	NaN	NaN	NaN	0	4	5
447	'>gi|567757591|ref|NP_001274680.1| squalene synthase isoform 4 [Homo sapiens]'	NaN	NaN	NaN	NaN	4	1	NaN	NaN	0	4	5
448	'>gi|82830426|ref|NP_006737.2| sex comb on midleg-like protein 1 isoform b [Homo sapiens]'	NaN	NaN	NaN	NaN	4	1	NaN	NaN	0	4	5
449	'>gi|10863945|ref|NP_066964.1| X-ray repair cross-complementing protein 5 [Homo sapiens]'	NaN	NaN	NaN	4	NaN	NaN	NaN	NaN	0	4	4
450	'>gi|112420977|ref|NP_036430.1| cullin-associated NEDD8-dissociated protein 2 isoform 2 [Homo sapiens]'	NaN	NaN	4	NaN	NaN	NaN	NaN	NaN	0	4	4
451	'>gi|11321607|ref|NP_004228.1| pachytene checkpoint protein 2 homolog isoform 1 [Homo sapiens]'	NaN	NaN	NaN	NaN	4	NaN	NaN	NaN	0	4	4
452	'>gi|117938759|ref|NP_536350.2| protein GNAS isoform XLas [Homo sapiens]'	NaN	NaN	NaN	NaN	4	NaN	NaN	NaN	0	4	4
453	'>gi|117938762|ref|NP_001070956.1| protein GNAS isoform f [Homo sapiens]'	NaN	NaN	NaN	NaN	NaN	4	NaN	NaN	0	4	4
454	'>gi|118200335|ref|NP_001071639.1| protein FAM127A [Homo sapiens]'	NaN	NaN	NaN	NaN	NaN	NaN	4	NaN	0	4	4
455	'>gi|11968182|ref|NP_072045.1| 40S ribosomal protein S18 [Homo sapiens]'	NaN	NaN	NaN	NaN	NaN	NaN	4	NaN	0	4	4
456	'>gi|126032350|ref|NP_001075109.1| DNA-dependent protein kinase catalytic subunit isoform 2 [Homo sapiens]'	NaN	NaN	NaN	4	NaN	NaN	NaN	NaN	0	4	4
457	'>gi|13236559|ref|NP_077295.1| multiple myeloma tumor-associated protein 2 [Homo sapiens]'	NaN	NaN	NaN	NaN	NaN	4	NaN	NaN	0	4	4
458	'>gi|147905592|ref|NP_001087198.1| coiled-coil domain-containing protein 102B [Homo sapiens]'	NaN	4	NaN	NaN	NaN	NaN	NaN	NaN	0	4	4
459	'>gi|148539842|ref|NP_015568.2| deleted in malignant brain tumors 1 protein isoform b precursor [Homo sapiens]'	NaN	NaN	NaN	4	NaN	NaN	NaN	NaN	0	4	4
460	'>gi|156766047|ref|NP_001096618.1| PERQ amino acid-rich with GYF domain-containing protein 2 isoform c [Homo sapiens]'	NaN	NaN	4	NaN	NaN	NaN	NaN	NaN	0	4	4
461	'>gi|157388904|ref|NP_060272.3| HEAT repeat-containing protein 2 [Homo sapiens]'	NaN	NaN	NaN	4	NaN	NaN	NaN	NaN	0	4	4
462	'>gi|157388937|ref|NP_060389.2| syntaxin-17 [Homo sapiens]'	NaN	NaN	NaN	NaN	NaN	4	NaN	NaN	0	4	4
463	'>gi|17158023|ref|NP_478070.1| protein FAM207A [Homo sapiens]'	NaN	NaN	NaN	NaN	NaN	4	NaN	NaN	0	4	4
464	'>gi|178557739|ref|NP_001002029.3| complement C4-B preproprotein [Homo sapiens]'	NaN	NaN	NaN	NaN	NaN	4	NaN	NaN	0	4	4
465	'>gi|188497750|ref|NP_277035.2| hexokinase-1 isoform HKI-td [Homo sapiens]'	NaN	NaN	NaN	4	NaN	NaN	NaN	NaN	0	4	4
466	'>gi|205360840|ref|NP_001128582.1| dnaJ homolog subfamily A member 3, mitochondrial isoform 2 [Homo sapiens]'	NaN	NaN	NaN	NaN	NaN	4	NaN	NaN	0	4	4
467	'>gi|21396489|ref|NP_004784.2| lon protease homolog, mitochondrial isoform 1 precursor [Homo sapiens]'	NaN	NaN	NaN	4	NaN	NaN	NaN	NaN	0	4	4
468	'>gi|224028246|ref|NP_001138881.1| non-POU domain-containing octamer-binding protein isoform 1 [Homo sapiens]'	NaN	NaN	NaN	NaN	4	NaN	NaN	NaN	0	4	4
469	'>gi|224493905|ref|NP_001139014.1| zinc finger and SCAN domain-containing protein 18 isoform 1 [Homo sapiens]'	NaN	NaN	NaN	4	NaN	NaN	NaN	NaN	0	4	4
470	'>gi|24430155|ref|NP_694546.1| 26S protease regulatory subunit 6B isoform 2 [Homo sapiens]'	NaN	NaN	NaN	NaN	4	NaN	NaN	NaN	0	4	4
471	'>gi|255003833|ref|NP_115518.3| centrosomal protein of 192 kDa [Homo sapiens]'	NaN	4	NaN	NaN	NaN	NaN	NaN	NaN	0	4	4
472	'>gi|25777612|ref|NP_002800.2| 26S proteasome non-ATPase regulatory subunit 3 [Homo sapiens]'	NaN	NaN	NaN	NaN	4	NaN	NaN	NaN	0	4	4
473	'>gi|266453278|ref|NP_001161093.1| ataxin-10 isoform 2 [Homo sapiens]'	NaN	NaN	NaN	NaN	4	NaN	NaN	NaN	0	4	4
474	'>gi|270265835|ref|NP_001161842.1| cullin-7 isoform 1 [Homo sapiens]'	NaN	NaN	4	NaN	NaN	NaN	NaN	NaN	0	4	4
475	'>gi|27777657|ref|NP_776249.1| serpin A12 precursor [Homo sapiens]'	NaN	4	NaN	NaN	NaN	NaN	NaN	NaN	0	4	4
476	'>gi|31543831|ref|NP_001061.2| tubulin gamma-1 chain [Homo sapiens]'	NaN	NaN	NaN	NaN	4	NaN	NaN	NaN	0	4	4
477	'>gi|324021745|ref|NP_001191236.1| vitamin D-binding protein isoform 3 precursor [Homo sapiens]'	NaN	NaN	4	NaN	NaN	NaN	NaN	NaN	0	4	4
478	'>gi|341865581|ref|NP_001230076.1| nuclear valosin-containing protein-like isoform 4 [Homo sapiens]'	NaN	NaN	NaN	4	NaN	NaN	NaN	NaN	0	4	4
479	'>gi|343478299|ref|NP_001230301.1| H(+)/Cl(-) exchange transporter 3 isoform a [Homo sapiens]'	NaN	NaN	NaN	4	NaN	NaN	NaN	NaN	0	4	4
480	'>gi|355477269|ref|NP_001239053.1| PAS domain-containing serine/threonine-protein kinase isoform 4 [Homo sapiens]'	NaN	NaN	NaN	NaN	4	NaN	NaN	NaN	0	4	4
481	'>gi|374081861|ref|NP_001243344.1| ras-related protein Rab-18 isoform 4 [Homo sapiens]'	NaN	NaN	NaN	NaN	NaN	4	NaN	NaN	0	4	4
482	'>gi|38372919|ref|NP_001719.2| basigin isoform 1 precursor [Homo sapiens]'	NaN	NaN	NaN	NaN	4	NaN	NaN	NaN	0	4	4
483	'>gi|389886539|ref|NP_001254507.1| torsin-1A-interacting protein 1 isoform 1 [Homo sapiens]'	NaN	NaN	NaN	NaN	4	NaN	NaN	NaN	0	4	4
484	'>gi|39753959|ref|NP_060104.2| BTB/POZ domain-containing protein KCTD9 [Homo sapiens]'	NaN	NaN	NaN	NaN	NaN	NaN	NaN	4	0	4	4
485	'>gi|408684407|ref|NP_060395.5| DENN domain-containing protein 4C [Homo sapiens]'	NaN	NaN	4	NaN	NaN	NaN	NaN	NaN	0	4	4
486	'>gi|41393547|ref|NP_056993.2| neuroblastoma-amplified sequence [Homo sapiens]'	NaN	NaN	NaN	NaN	NaN	4	NaN	NaN	0	4	4
487	'>gi|4502981|ref|NP_001852.1| cytochrome c oxidase subunit 4 isoform 1, mitochondrial precursor [Homo sapiens]'	NaN	NaN	NaN	NaN	NaN	NaN	4	NaN	0	4	4
488	'>gi|4503729|ref|NP_002005.1| peptidyl-prolyl cis-trans isomerase FKBP4 [Homo sapiens]'	NaN	NaN	NaN	NaN	4	NaN	NaN	NaN	0	4	4
489	'>gi|4506613|ref|NP_000974.1| 60S ribosomal protein L22 proprotein [Homo sapiens]'	NaN	NaN	NaN	NaN	NaN	NaN	4	NaN	0	4	4
490	'>gi|45387955|ref|NP_991330.1| protein QIL1 precursor [Homo sapiens]'	NaN	NaN	NaN	NaN	NaN	NaN	4	NaN	0	4	4
491	'>gi|46276893|ref|NP_996896.1| transcription elongation factor B polypeptide 2 isoform b [Homo sapiens]'	NaN	NaN	NaN	NaN	NaN	4	NaN	NaN	0	4	4
492	'>gi|46367787|ref|NP_002559.2| polyadenylate-binding protein 1 [Homo sapiens]'	NaN	NaN	NaN	NaN	4	NaN	NaN	NaN	0	4	4
493	'>gi|4758788|ref|NP_004542.1| NADH dehydrogenase [ubiquinone] iron-sulfur protein 3, mitochondrial precursor [Homo sapiens]'	NaN	NaN	NaN	NaN	NaN	4	NaN	NaN	0	4	4
494	'>gi|48255945|ref|NP_001673.2| plasma membrane calcium-transporting ATPase 1 isoform 1b [Homo sapiens]'	NaN	NaN	4	NaN	NaN	NaN	NaN	NaN	0	4	4
495	'>gi|4826686|ref|NP_004930.1| ATP-dependent RNA helicase DDX1 [Homo sapiens]'	NaN	NaN	NaN	4	NaN	NaN	NaN	NaN	0	4	4
496	'>gi|4826998|ref|NP_005057.1| splicing factor, proline- and glutamine-rich [Homo sapiens]'	NaN	NaN	NaN	4	NaN	NaN	NaN	NaN	0	4	4
497	'>gi|50659095|ref|NP_004719.2| nucleolar RNA helicase 2 isoform 1 [Homo sapiens]'	NaN	NaN	NaN	4	NaN	NaN	NaN	NaN	0	4	4
498	'>gi|51093832|ref|NP_056450.2| GTPase-activating protein and VPS9 domain-containing protein 1 isoform 4 [Homo sapiens]'	NaN	NaN	4	NaN	NaN	NaN	NaN	NaN	0	4	4
499	'>gi|530377873|ref|XP_005263140.1| PREDICTED: probable E3 ubiquitin-protein ligase HERC6 isoform X1 [Homo sapiens]'	NaN	NaN	NaN	4	NaN	NaN	NaN	NaN	0	4	4
500	'>gi|530414709|ref|XP_005259899.1| PREDICTED: peptidyl-prolyl cis-trans isomerase FKBP8 isoform X2 [Homo sapiens]'	NaN	NaN	NaN	NaN	4	NaN	NaN	NaN	0	4	4
501	'>gi|5453549|ref|NP_006397.1| peroxiredoxin-4 precursor [Homo sapiens]'	NaN	NaN	NaN	NaN	NaN	4	NaN	NaN	0	4	4
502	'>gi|5453597|ref|NP_006126.1| F-actin-capping protein subunit alpha-1 [Homo sapiens]'	NaN	NaN	NaN	NaN	NaN	4	NaN	NaN	0	4	4
503	'>gi|548960892|ref|NP_001271455.1| aurora kinase B isoform 3 [Homo sapiens]'	NaN	NaN	NaN	NaN	NaN	4	NaN	NaN	0	4	4
504	'>gi|557129022|ref|NP_001273387.1| ubiquitin carboxyl-terminal hydrolase 7 isoform 3 [Homo sapiens]'	NaN	NaN	4	NaN	NaN	NaN	NaN	NaN	0	4	4
505	'>gi|570700827|ref|NP_001275682.1| structural maintenance of chromosomes protein 4 isoform 2 [Homo sapiens]'	NaN	NaN	4	NaN	NaN	NaN	NaN	NaN	0	4	4
506	'>gi|589269130|ref|NP_001277113.1| nicastrin isoform 2 [Homo sapiens]'	NaN	NaN	4	NaN	NaN	NaN	NaN	NaN	0	4	4
507	'>gi|5901922|ref|NP_008996.1| hsp90 co-chaperone Cdc37 [Homo sapiens]'	NaN	NaN	NaN	NaN	4	NaN	NaN	NaN	0	4	4
508	'>gi|5902122|ref|NP_008877.1| spectrin beta chain, non-erythrocytic 2 [Homo sapiens]'	NaN	NaN	4	NaN	NaN	NaN	NaN	NaN	0	4	4
509	'>gi|60218913|ref|NP_001007215.1| calcyclin-binding protein isoform 2 [Homo sapiens]'	NaN	NaN	NaN	NaN	NaN	4	NaN	NaN	0	4	4
510	'>gi|618857509|ref|NP_006001.4| mesencephalic astrocyte-derived neurotrophic factor precursor [Homo sapiens]'	4	NaN	NaN	NaN	NaN	NaN	NaN	NaN	0	4	4
511	'>gi|62955803|ref|NP_056169.1| nucleoporin NUP188 homolog [Homo sapiens]'	NaN	NaN	4	NaN	NaN	NaN	NaN	NaN	0	4	4
512	'>gi|663856631|ref|NP_001287718.1| peroxisomal biogenesis factor 5 isoform e [Homo sapiens]'	NaN	NaN	NaN	4	NaN	NaN	NaN	NaN	0	4	4
513	'>gi|71772415|ref|NP_001025180.1| 40S ribosomal protein S15a [Homo sapiens]'	NaN	NaN	NaN	NaN	NaN	NaN	4	NaN	0	4	4
514	'>gi|73466520|ref|NP_001026976.1| fatty aldehyde dehydrogenase isoform 1 [Homo sapiens]'	NaN	NaN	NaN	NaN	4	NaN	NaN	NaN	0	4	4
515	'>gi|7705558|ref|NP_057452.1| inositol-3-phosphate synthase 1 isoform 1 [Homo sapiens]'	NaN	NaN	NaN	NaN	4	NaN	NaN	NaN	0	4	4
516	'>gi|7705855|ref|NP_057226.1| estradiol 17-beta-dehydrogenase 12 [Homo sapiens]'	NaN	NaN	NaN	NaN	NaN	4	NaN	NaN	0	4	4
517	'>gi|8922701|ref|NP_060708.1| acylglycerol kinase, mitochondrial precursor [Homo sapiens]'	NaN	NaN	NaN	NaN	4	NaN	NaN	NaN	0	4	4
518	'>gi|8923930|ref|NP_060934.1| CDGSH iron-sulfur domain-containing protein 1 [Homo sapiens]'	NaN	NaN	NaN	NaN	NaN	NaN	4	NaN	0	4	4
519	'>gi|13129110|ref|NP_077007.1| methylosome protein 50 [Homo sapiens]'	2	2	NaN	1	2	3	1	3	0	3	14
520	'>gi|4506145|ref|NP_002760.1| trypsin-1 preproprotein [Homo sapiens]'	2	NaN	NaN	1	1	3	3	2	0	3	12
521	'>gi|567316172|ref|NP_001274528.1| THAP domain-containing protein 5 isoform 3 [Homo sapiens]'	2	NaN	2	2	3	1	2	NaN	0	3	12
522	'>gi|150456463|ref|NP_835465.2| gasdermin-A [Homo sapiens]'	1	1	2	3	NaN	3	NaN	1	0	3	11
523	'>gi|170296790|ref|NP_031369.2| trypsin-3 isoform 1 preproprotein [Homo sapiens]'	3	2	NaN	1	1	2	1	1	0	3	11
524	'>gi|4557367|ref|NP_000377.1| bleomycin hydrolase [Homo sapiens]'	2	2	3	NaN	NaN	2	1	1	0	3	11
525	'>gi|30089940|ref|NP_005886.2| Golgin subfamily A member 3 isoform 1 [Homo sapiens]'	2	3	NaN	NaN	NaN	3	2	NaN	0	3	10
526	'>gi|221316614|ref|NP_004416.2| extracellular matrix protein 1 isoform 1 precursor [Homo sapiens]'	2	NaN	3	2	NaN	1	NaN	NaN	0	3	8
527	'''>gi|26006851|ref|NP_003710.1| high affinity cAMP-specific and IBMX-insensitive 3'',5''-cyclic phosphodiesterase 8B isoform 1 [Homo...'' <Preview truncated at 128 characters>'	1	NaN	2	1	NaN	3	1	NaN	0	3	8
528	'>gi|4507475|ref|NP_000350.1| protein-glutamine gamma-glutamyltransferase K [Homo sapiens]'	NaN	NaN	3	3	NaN	2	NaN	NaN	0	3	8
529	'>gi|193794853|ref|NP_079197.3| protein POF1B [Homo sapiens]'	3	1	1	NaN	NaN	2	NaN	NaN	0	3	7
530	'>gi|4503571|ref|NP_001419.1| alpha-enolase isoform 1 [Homo sapiens]'	NaN	2	NaN	3	NaN	2	NaN	NaN	0	3	7
531	'>gi|4504985|ref|NP_002298.1| galectin-7 [Homo sapiens]'	1	NaN	1	NaN	NaN	2	3	NaN	0	3	7
532	'>gi|13129018|ref|NP_076956.1| gamma-glutamylcyclotransferase isoform 1 [Homo sapiens]'	3	1	1	1	NaN	NaN	NaN	NaN	0	3	6
533	'>gi|21489959|ref|NP_653247.1| immunoglobulin J chain precursor [Homo sapiens]'	1	NaN	NaN	3	NaN	1	1	NaN	0	3	6
534	'>gi|34335134|ref|NP_899195.1| protein SEC13 homolog isoform 1 [Homo sapiens]'	NaN	NaN	NaN	NaN	3	3	NaN	NaN	0	3	6
535	'>gi|557948045|ref|NP_079084.3| protein aurora borealis isoform 1 [Homo sapiens]'	NaN	NaN	NaN	3	3	NaN	NaN	NaN	0	3	6
536	'>gi|5902072|ref|NP_008850.1| serpin B3 [Homo sapiens]'	NaN	NaN	NaN	NaN	1	3	2	NaN	0	3	6
537	'>gi|217272892|ref|NP_004238.3| 116 kDa U5 small nuclear ribonucleoprotein component isoform a [Homo sapiens]'	NaN	NaN	2	3	NaN	NaN	NaN	NaN	0	3	5
538	'>gi|262118216|ref|NP_115627.6| coiled-coil domain-containing protein 88B precursor [Homo sapiens]'	NaN	NaN	3	NaN	NaN	2	NaN	NaN	0	3	5
539	'>gi|34740329|ref|NP_919223.1| heterogeneous nuclear ribonucleoprotein A3 [Homo sapiens]'	NaN	NaN	NaN	NaN	2	3	NaN	NaN	0	3	5
540	'>gi|4506697|ref|NP_001014.1| 40S ribosomal protein S20 isoform 2 [Homo sapiens]'	NaN	NaN	NaN	NaN	NaN	2	3	NaN	0	3	5
541	'>gi|530384253|ref|XP_005267294.1| PREDICTED: bcl-2-associated transcription factor 1 isoform X2 [Homo sapiens]'	NaN	NaN	3	2	NaN	NaN	NaN	NaN	0	3	5
542	'>gi|61743954|ref|NP_001611.1| neuroblast differentiation-associated protein AHNAK isoform 1 [Homo sapiens]'	3	NaN	NaN	NaN	NaN	2	NaN	NaN	0	3	5
543	'>gi|83641876|ref|NP_061902.2| probable serine carboxypeptidase CPVL precursor [Homo sapiens]'	NaN	NaN	NaN	NaN	2	3	NaN	NaN	0	3	5
544	'>gi|9910278|ref|NP_064584.1| keratinocyte-associated transmembrane protein 2 precursor [Homo sapiens]'	NaN	NaN	NaN	3	2	NaN	NaN	NaN	0	3	5
545	'>gi|116642885|ref|NP_001070867.1| probable hydrolase PNKD isoform 3 precursor [Homo sapiens]'	NaN	NaN	NaN	NaN	NaN	1	3	NaN	0	3	4
546	'>gi|118601081|ref|NP_001073027.1| heterogeneous nuclear ribonucleoprotein U-like protein 2 [Homo sapiens]'	NaN	NaN	1	3	NaN	NaN	NaN	NaN	0	3	4
547	'>gi|119964721|ref|NP_005237.2| tyrosine-protein kinase Fer [Homo sapiens]'	1	NaN	3	NaN	NaN	NaN	NaN	NaN	0	3	4
548	'>gi|157502195|ref|NP_787128.2| 26S proteasome non-ATPase regulatory subunit 13 isoform 2 [Homo sapiens]'	NaN	NaN	NaN	NaN	1	3	NaN	NaN	0	3	4
549	'>gi|21389315|ref|NP_005975.1| tricarboxylate transport protein, mitochondrial isoform a precursor [Homo sapiens]'	NaN	NaN	NaN	NaN	NaN	3	1	NaN	0	3	4
550	'>gi|215490096|ref|NP_001135920.1| protein spinster homolog 1 isoform 1 [Homo sapiens]'	NaN	NaN	NaN	1	3	NaN	NaN	NaN	0	3	4
551	'>gi|228008396|ref|NP_001153145.1| heterogeneous nuclear ribonucleoprotein Q isoform 2 [Homo sapiens]'	NaN	NaN	NaN	1	3	NaN	NaN	NaN	0	3	4
552	'>gi|296317339|ref|NP_001171752.1| voltage-dependent anion-selective channel protein 2 isoform 2 [Homo sapiens]'	NaN	NaN	NaN	NaN	NaN	3	1	NaN	0	3	4
553	'>gi|300796991|ref|NP_001177990.1| mitochondrial glutamate carrier 1 [Homo sapiens]'	NaN	NaN	NaN	NaN	1	3	NaN	NaN	0	3	4
554	'>gi|372466586|ref|NP_001243225.1| immunoglobulin lambda-like polypeptide 5 isoform 2 [Homo sapiens]'	NaN	NaN	NaN	3	NaN	1	NaN	NaN	0	3	4
555	'>gi|38372925|ref|NP_940991.1| basigin isoform 2 [Homo sapiens]'	NaN	NaN	NaN	3	NaN	1	NaN	NaN	0	3	4
556	'>gi|4503313|ref|NP_003638.1| diacylglycerol kinase epsilon [Homo sapiens]'	NaN	NaN	NaN	1	3	NaN	NaN	NaN	0	3	4
557	'>gi|4506691|ref|NP_001011.1| 40S ribosomal protein S16 [Homo sapiens]'	NaN	NaN	NaN	NaN	NaN	1	3	NaN	0	3	4
558	'>gi|4507729|ref|NP_001060.1| tubulin beta-2A chain [Homo sapiens]'	NaN	NaN	NaN	NaN	3	NaN	1	NaN	0	3	4
559	'>gi|5032181|ref|NP_005825.1| mitochondrial import inner membrane translocase subunit Tim17-B isoform 2 [Homo sapiens]'	NaN	NaN	NaN	NaN	NaN	3	1	NaN	0	3	4
560	'>gi|530411133|ref|XP_005258084.1| PREDICTED: transcription elongation factor SPT6 isoform X2 [Homo sapiens]'	NaN	3	1	NaN	NaN	NaN	NaN	NaN	0	3	4
561	'>gi|5453998|ref|NP_006382.1| importin-7 [Homo sapiens]'	NaN	NaN	3	1	NaN	NaN	NaN	NaN	0	3	4
562	'>gi|5729953|ref|NP_006591.1| nuclear migration protein nudC [Homo sapiens]'	NaN	NaN	NaN	NaN	3	1	NaN	NaN	0	3	4
563	'>gi|6678271|ref|NP_031401.1| TAR DNA-binding protein 43 [Homo sapiens]'	NaN	NaN	NaN	NaN	3	1	NaN	NaN	0	3	4
564	'>gi|6912430|ref|NP_036537.1| protein-S-isoprenylcysteine O-methyltransferase [Homo sapiens]'	NaN	NaN	NaN	NaN	NaN	1	3	NaN	0	3	4
565	'>gi|84697022|ref|NP_705873.2| homeobox protein Hox-A1 isoform b [Homo sapiens]'	NaN	NaN	NaN	NaN	1	NaN	3	NaN	0	3	4
566	'>gi|10190682|ref|NP_065700.1| chromobox protein homolog 8 [Homo sapiens]'	NaN	3	NaN	NaN	NaN	NaN	NaN	NaN	0	3	3
567	'>gi|109255234|ref|NP_079390.3| centrosomal protein of 290 kDa [Homo sapiens]'	NaN	NaN	NaN	NaN	3	NaN	NaN	NaN	0	3	3
568	'>gi|109637791|ref|NP_060899.2| transcription factor TFIIIB component B'''' homolog [Homo sapiens]'	NaN	NaN	NaN	NaN	NaN	3	NaN	NaN	0	3	3
569	'>gi|109715835|ref|NP_071353.4| HEAT repeat-containing protein 6 [Homo sapiens]'	NaN	NaN	3	NaN	NaN	NaN	NaN	NaN	0	3	3
570	'>gi|110347425|ref|NP_001036016.1| structural maintenance of chromosomes protein 2 [Homo sapiens]'	NaN	NaN	3	NaN	NaN	NaN	NaN	NaN	0	3	3
571	'>gi|11141903|ref|NP_068598.1| FAST kinase domain-containing protein 5 [Homo sapiens]'	NaN	NaN	NaN	NaN	3	NaN	NaN	NaN	0	3	3
572	'>gi|11321583|ref|NP_003841.1| succinyl-CoA ligase [ADP-forming] subunit beta, mitochondrial precursor [Homo sapiens]'	NaN	NaN	NaN	NaN	3	NaN	NaN	NaN	0	3	3
573	'>gi|11464969|ref|NP_009188.1| paraneoplastic antigen Ma2 [Homo sapiens]'	NaN	NaN	NaN	NaN	3	NaN	NaN	NaN	0	3	3
574	'>gi|115298678|ref|NP_000055.2| complement C3 precursor [Homo sapiens]'	NaN	NaN	NaN	3	NaN	NaN	NaN	NaN	0	3	3
575	'>gi|116089331|ref|NP_078779.2| transcription factor HIVEP3 isoform a [Homo sapiens]'	NaN	NaN	NaN	NaN	3	NaN	NaN	NaN	0	3	3
576	'>gi|116235474|ref|NP_443134.2| serine/threonine-protein kinase 11-interacting protein [Homo sapiens]'	NaN	NaN	3	NaN	NaN	NaN	NaN	NaN	0	3	3
577	'>gi|116256487|ref|NP_006693.3| neuropathy target esterase isoform b [Homo sapiens]'	NaN	NaN	3	NaN	NaN	NaN	NaN	NaN	0	3	3
578	'>gi|11641421|ref|NP_067090.1| ceramide synthase 1 isoform 1 [Homo sapiens]'	NaN	NaN	NaN	NaN	NaN	3	NaN	NaN	0	3	3
579	'>gi|124244056|ref|NP_689637.3| APC membrane recruitment protein 1 [Homo sapiens]'	NaN	NaN	3	NaN	NaN	NaN	NaN	NaN	0	3	3
580	'>gi|13027640|ref|NP_005754.2| alpha-aminoadipic semialdehyde synthase, mitochondrial [Homo sapiens]'	NaN	NaN	NaN	NaN	3	NaN	NaN	NaN	0	3	3
581	'>gi|13124773|ref|NP_057542.2| protein FAM203A [Homo sapiens]'	NaN	NaN	NaN	NaN	3	NaN	NaN	NaN	0	3	3
582	'>gi|13375618|ref|NP_055577.1| delta(24)-sterol reductase precursor [Homo sapiens]'	NaN	NaN	NaN	NaN	3	NaN	NaN	NaN	0	3	3
583	'>gi|134142337|ref|NP_004987.2| multidrug resistance-associated protein 1 [Homo sapiens]'	NaN	NaN	3	NaN	NaN	NaN	NaN	NaN	0	3	3
584	'>gi|134244281|ref|NP_005920.2| melanotransferrin isoform 1 precursor [Homo sapiens]'	NaN	NaN	NaN	NaN	NaN	3	NaN	NaN	0	3	3
585	'>gi|14277700|ref|NP_001007.2| 40S ribosomal protein S12 [Homo sapiens]'	NaN	NaN	NaN	NaN	NaN	NaN	3	NaN	0	3	3
586	'>gi|145312246|ref|NP_001077433.1| tudor and KH domain-containing protein isoform b [Homo sapiens]'	NaN	NaN	NaN	NaN	3	NaN	NaN	NaN	0	3	3
587	'>gi|14591909|ref|NP_000960.2| 60S ribosomal protein L5 [Homo sapiens]'	NaN	NaN	NaN	NaN	NaN	3	NaN	NaN	0	3	3
588	'>gi|145977196|ref|NP_001078841.1| UPF0723 protein C11orf83 precursor [Homo sapiens]'	NaN	NaN	NaN	NaN	NaN	NaN	3	NaN	0	3	3
589	'>gi|14790190|ref|NP_055816.2| msx2-interacting protein [Homo sapiens]'	NaN	3	NaN	NaN	NaN	NaN	NaN	NaN	0	3	3
590	'>gi|148839466|ref|NP_001019831.2| kalirin isoform 1 [Homo sapiens]'	NaN	NaN	NaN	NaN	3	NaN	NaN	NaN	0	3	3
591	'>gi|15011880|ref|NP_057626.2| serine/threonine-protein kinase MST4 isoform 1 [Homo sapiens]'	NaN	NaN	NaN	NaN	3	NaN	NaN	NaN	0	3	3
592	'>gi|153792590|ref|NP_001017963.2| heat shock protein HSP 90-alpha isoform 1 [Homo sapiens]'	NaN	3	NaN	NaN	NaN	NaN	NaN	NaN	0	3	3
593	'>gi|157671927|ref|NP_660208.2| spermatogenesis-associated protein 5 [Homo sapiens]'	NaN	NaN	NaN	3	NaN	NaN	NaN	NaN	0	3	3
594	'>gi|162809336|ref|NP_001010883.2| protein FAM102B [Homo sapiens]'	NaN	NaN	NaN	3	NaN	NaN	NaN	NaN	0	3	3
595	'>gi|166795297|ref|NP_057225.2| cytoplasmic dynein 1 light intermediate chain 1 [Homo sapiens]'	NaN	NaN	NaN	NaN	3	NaN	NaN	NaN	0	3	3
596	'>gi|17105394|ref|NP_000975.2| 60S ribosomal protein L23a [Homo sapiens]'	NaN	NaN	NaN	NaN	NaN	NaN	3	NaN	0	3	3
597	'>gi|171906582|ref|NP_064583.2| coiled-coil domain-containing protein 47 precursor [Homo sapiens]'	NaN	NaN	NaN	NaN	3	NaN	NaN	NaN	0	3	3
598	'>gi|17921987|ref|NP_004367.2| cytochrome c oxidase assembly protein COX15 homolog isoform 2 [Homo sapiens]'	NaN	NaN	NaN	NaN	NaN	3	NaN	NaN	0	3	3
599	'>gi|189458819|ref|NP_001121620.1| transferrin receptor protein 1 [Homo sapiens]'	NaN	NaN	NaN	3	NaN	NaN	NaN	NaN	0	3	3
600	'>gi|194578921|ref|NP_001123999.1| C-Jun-amino-terminal kinase-interacting protein 4 isoform 2 [Homo sapiens]'	NaN	NaN	3	NaN	NaN	NaN	NaN	NaN	0	3	3
601	'>gi|19526767|ref|NP_598407.1| mitogen-activated protein kinase kinase kinase MLT isoform 2 [Homo sapiens]'	NaN	NaN	NaN	NaN	3	NaN	NaN	NaN	0	3	3
602	'>gi|197382758|ref|NP_001127964.1| heparan sulfate 2-O-sulfotransferase 1 isoform 2 [Homo sapiens]'	NaN	NaN	NaN	NaN	3	NaN	NaN	NaN	0	3	3
603	'>gi|20070125|ref|NP_000909.2| protein disulfide-isomerase precursor [Homo sapiens]'	NaN	NaN	NaN	NaN	3	NaN	NaN	NaN	0	3	3
604	'>gi|20127408|ref|NP_000173.2| trifunctional enzyme subunit alpha, mitochondrial precursor [Homo sapiens]'	NaN	NaN	NaN	3	NaN	NaN	NaN	NaN	0	3	3
605	'>gi|203098098|ref|NP_065910.3| protein Shroom3 [Homo sapiens]'	NaN	NaN	NaN	NaN	NaN	3	NaN	NaN	0	3	3
606	'>gi|21071032|ref|NP_057306.2| probable ATP-dependent RNA helicase DDX41 [Homo sapiens]'	NaN	NaN	NaN	NaN	3	NaN	NaN	NaN	0	3	3
607	'>gi|21361368|ref|NP_002851.2| delta-1-pyrroline-5-carboxylate synthase isoform 1 [Homo sapiens]'	NaN	NaN	NaN	3	NaN	NaN	NaN	NaN	0	3	3
608	'>gi|214010212|ref|NP_001135753.1| coatomer subunit delta isoform 2 [Homo sapiens]'	NaN	NaN	NaN	NaN	3	NaN	NaN	NaN	0	3	3
609	'>gi|21704277|ref|NP_002217.3| protein jagged-2 isoform a precursor [Homo sapiens]'	NaN	NaN	3	NaN	NaN	NaN	NaN	NaN	0	3	3
610	'>gi|223941779|ref|NP_001138828.1| COBW domain-containing protein 1 isoform 3 [Homo sapiens]'	NaN	NaN	NaN	NaN	3	NaN	NaN	NaN	0	3	3
611	'>gi|226371704|ref|NP_076415.3| zinc finger and SCAN domain-containing protein 18 isoform 3 [Homo sapiens]'	NaN	NaN	NaN	NaN	3	NaN	NaN	NaN	0	3	3
612	'>gi|237649049|ref|NP_808210.2| small nuclear ribonucleoprotein Sm D2 isoform 2 [Homo sapiens]'	NaN	NaN	NaN	NaN	NaN	NaN	3	NaN	0	3	3
613	'>gi|24307961|ref|NP_055472.1| TELO2-interacting protein 1 homolog [Homo sapiens]'	NaN	NaN	NaN	3	NaN	NaN	NaN	NaN	0	3	3
614	'>gi|24638433|ref|NP_056146.1| nicastrin isoform 1 precursor [Homo sapiens]'	NaN	NaN	NaN	3	NaN	NaN	NaN	NaN	0	3	3
615	'>gi|254587994|ref|NP_001157019.1| synergin gamma isoform 7 [Homo sapiens]'	NaN	NaN	3	NaN	NaN	NaN	NaN	NaN	0	3	3
616	'>gi|26080431|ref|NP_079133.3| ATPase family AAA domain-containing protein 5 [Homo sapiens]'	NaN	NaN	NaN	NaN	NaN	NaN	NaN	3	0	3	3
617	'>gi|291621664|ref|NP_001167589.1| RNA-binding protein MEX3D isoform 2 [Homo sapiens]'	NaN	NaN	NaN	3	NaN	NaN	NaN	NaN	0	3	3
618	'>gi|301069416|ref|NP_001180286.1| nuclear pore glycoprotein p62 [Homo sapiens]'	NaN	NaN	NaN	NaN	3	NaN	NaN	NaN	0	3	3
619	'>gi|311771641|ref|NP_001185708.1| cullin-2 isoform b [Homo sapiens]'	NaN	NaN	NaN	3	NaN	NaN	NaN	NaN	0	3	3
620	'>gi|312596881|ref|NP_001186092.1| 26S protease regulatory subunit 8 isoform 2 [Homo sapiens]'	NaN	NaN	NaN	NaN	3	NaN	NaN	NaN	0	3	3
621	'>gi|31652236|ref|NP_001904.2| protein CASP isoform b [Homo sapiens]'	NaN	NaN	NaN	3	NaN	NaN	NaN	NaN	0	3	3
622	'>gi|32967601|ref|NP_066267.2| ankyrin-3 isoform 1 [Homo sapiens]'	NaN	NaN	3	NaN	NaN	NaN	NaN	NaN	0	3	3
623	'>gi|330688408|ref|NP_892006.3| nesprin-1 isoform 1 [Homo sapiens]'	NaN	NaN	NaN	NaN	NaN	3	NaN	NaN	0	3	3
624	'>gi|334358866|ref|NP_001229291.1| melanoma-associated antigen D4 isoform 3 [Homo sapiens]'	NaN	NaN	NaN	3	NaN	NaN	NaN	NaN	0	3	3
625	'>gi|34147522|ref|NP_064632.2| chaperone activity of bc1 complex-like, mitochondrial [Homo sapiens]'	NaN	NaN	NaN	NaN	3	NaN	NaN	NaN	0	3	3
626	'>gi|34577075|ref|NP_005460.2| acyl-coenzyme A thioesterase 8 [Homo sapiens]'	NaN	NaN	NaN	NaN	NaN	3	NaN	NaN	0	3	3
627	'>gi|354548850|ref|NP_001238910.1| calcipressin-3 isoform 3 [Homo sapiens]'	NaN	NaN	NaN	NaN	NaN	NaN	3	NaN	0	3	3
628	'>gi|378744165|ref|NP_001243755.1| RNA polymerase II-associated factor 1 homolog isoform 2 [Homo sapiens]'	NaN	NaN	NaN	3	NaN	NaN	NaN	NaN	0	3	3
629	'>gi|384475528|ref|NP_001244958.1| gelsolin isoform d [Homo sapiens]'	NaN	NaN	NaN	NaN	NaN	3	NaN	NaN	0	3	3
630	'>gi|38570099|ref|NP_942581.1| glutamine-rich protein 1 [Homo sapiens]'	NaN	NaN	NaN	3	NaN	NaN	NaN	NaN	0	3	3
631	'>gi|395394053|ref|NP_001257449.1| disheveled-associated activator of morphogenesis 1 isoform 2 [Homo sapiens]'	NaN	NaN	3	NaN	NaN	NaN	NaN	NaN	0	3	3
632	'>gi|39930541|ref|NP_899064.1| uncharacterized protein C9orf142 [Homo sapiens]'	NaN	NaN	NaN	NaN	NaN	3	NaN	NaN	0	3	3
633	'>gi|40068049|ref|NP_060093.3| metal transporter CNNM3 isoform 1 precursor [Homo sapiens]'	NaN	NaN	NaN	3	NaN	NaN	NaN	NaN	0	3	3
634	'>gi|4502709|ref|NP_001777.1| cyclin-dependent kinase 1 isoform 1 [Homo sapiens]'	NaN	NaN	NaN	NaN	NaN	3	NaN	NaN	0	3	3
635	'''>gi|4503523|ref|NP_003744.1| eukaryotic translation initiation factor 3 subunit D {ECO:0000255|HAMAP-Rule:MF_03003} [Homo sapien...'' <Preview truncated at 128 characters>'	NaN	NaN	NaN	NaN	3	NaN	NaN	NaN	0	3	3
636	'>gi|4504327|ref|NP_000174.1| trifunctional enzyme subunit beta, mitochondrial isoform 1 precursor [Homo sapiens]'	NaN	NaN	NaN	NaN	3	NaN	NaN	NaN	0	3	3
637	'>gi|4504517|ref|NP_001531.1| heat shock protein beta-1 [Homo sapiens]'	NaN	NaN	NaN	NaN	NaN	3	NaN	NaN	0	3	3
638	'>gi|4506623|ref|NP_000979.1| 60S ribosomal protein L27 [Homo sapiens]'	NaN	NaN	NaN	NaN	NaN	NaN	3	NaN	0	3	3
639	'>gi|4507239|ref|NP_003136.1| translocon-associated protein subunit beta precursor [Homo sapiens]'	NaN	NaN	NaN	NaN	NaN	3	NaN	NaN	0	3	3
640	'>gi|4507677|ref|NP_003290.1| endoplasmin precursor [Homo sapiens]'	NaN	NaN	NaN	3	NaN	NaN	NaN	NaN	0	3	3
641	'>gi|45597177|ref|NP_055858.2| TBC1 domain family member 9B isoform b [Homo sapiens]'	NaN	NaN	3	NaN	NaN	NaN	NaN	NaN	0	3	3
642	'>gi|46370082|ref|NP_996920.1| transcription factor 12 isoform a [Homo sapiens]'	NaN	NaN	NaN	3	NaN	NaN	NaN	NaN	0	3	3
643	'>gi|4759226|ref|NP_004603.1| TGF-beta receptor type-1 isoform 1 precursor [Homo sapiens]'	NaN	NaN	NaN	NaN	3	NaN	NaN	NaN	0	3	3
644	'>gi|4826762|ref|NP_005134.1| haptoglobin isoform 1 preproprotein [Homo sapiens]'	NaN	NaN	NaN	3	NaN	NaN	NaN	NaN	0	3	3
645	'>gi|5032315|ref|NP_004001.1| dystrophin Dp427p2 isoform [Homo sapiens]'	NaN	NaN	NaN	NaN	3	NaN	NaN	NaN	0	3	3
646	'>gi|50659080|ref|NP_001076.2| alpha-1-antichymotrypsin precursor [Homo sapiens]'	NaN	NaN	NaN	3	NaN	NaN	NaN	NaN	0	3	3
647	'>gi|526118147|ref|NP_001267717.1| surfeit locus protein 4 isoform 2 [Homo sapiens]'	NaN	NaN	NaN	NaN	NaN	NaN	3	NaN	0	3	3
648	'>gi|530370916|ref|XP_005246889.1| PREDICTED: tubulin alpha-4A chain isoform X1 [Homo sapiens]'	NaN	NaN	NaN	NaN	NaN	3	NaN	NaN	0	3	3
649	'''>gi|530379548|ref|XP_005248681.1| PREDICTED: high affinity cAMP-specific and IBMX-insensitive 3'',5''-cyclic phosphodiesterase 8B ...'' <Preview truncated at 128 characters>'	NaN	3	NaN	NaN	NaN	NaN	NaN	NaN	0	3	3
650	'>gi|530406197|ref|XP_005254606.1| PREDICTED: beta-2-microglobulin isoform X1 [Homo sapiens]'	NaN	NaN	NaN	NaN	NaN	3	NaN	NaN	0	3	3
651	'>gi|53729346|ref|NP_000290.2| plakophilin-1 isoform 1b [Homo sapiens]'	NaN	NaN	NaN	NaN	NaN	3	NaN	NaN	0	3	3
652	'>gi|544711041|ref|NP_001269836.1| T-complex protein 1 subunit theta isoform 2 [Homo sapiens]'	NaN	NaN	NaN	NaN	NaN	3	NaN	NaN	0	3	3
653	'>gi|5454158|ref|NP_006286.1| valine--tRNA ligase [Homo sapiens]'	NaN	NaN	3	NaN	NaN	NaN	NaN	NaN	0	3	3
654	'>gi|54792138|ref|NP_055692.2| probable helicase with zinc finger domain [Homo sapiens]'	NaN	NaN	3	NaN	NaN	NaN	NaN	NaN	0	3	3
655	'>gi|550544217|ref|NP_001272368.1| rapamycin-insensitive companion of mTOR isoform 2 [Homo sapiens]'	NaN	NaN	3	NaN	NaN	NaN	NaN	NaN	0	3	3
656	'>gi|557636736|ref|NP_001273554.1| RNA-binding protein with serine-rich domain 1 isoform a [Homo sapiens]'	NaN	3	NaN	NaN	NaN	NaN	NaN	NaN	0	3	3
657	'>gi|557636741|ref|NP_001273556.1| RNA-binding protein with serine-rich domain 1 isoform c [Homo sapiens]'	3	NaN	NaN	NaN	NaN	NaN	NaN	NaN	0	3	3
658	'''>gi|5730027|ref|NP_006550.1| KH domain-containing, RNA-binding, signal transduction-associated protein 1 isoform 1 [Homo sapiens...'' <Preview truncated at 128 characters>'	NaN	NaN	NaN	NaN	3	NaN	NaN	NaN	0	3	3
659	'>gi|578800538|ref|XP_006711225.1| PREDICTED: lysophospholipase-like protein 1 isoform X5 [Homo sapiens]'	NaN	NaN	NaN	NaN	NaN	3	NaN	NaN	0	3	3
660	'>gi|578823772|ref|XP_006719480.1| PREDICTED: nascent polypeptide-associated complex subunit alpha isoform X6 [Homo sapiens]'	NaN	NaN	NaN	NaN	NaN	3	NaN	NaN	0	3	3
661	'>gi|578829853|ref|XP_006721570.1| PREDICTED: active breakpoint cluster region-related protein isoform X2 [Homo sapiens]'	NaN	NaN	3	NaN	NaN	NaN	NaN	NaN	0	3	3
662	'''>gi|578840069|ref|XP_006725286.1| PREDICTED: pyridoxal-dependent decarboxylase domain-containing protein 1-like isoform X1 [Homo...'' <Preview truncated at 128 characters>'	NaN	NaN	NaN	3	NaN	NaN	NaN	NaN	0	3	3
663	'>gi|59710109|ref|NP_057673.2| complex I assembly factor TIMMDC1, mitochondrial precursor [Homo sapiens]'	NaN	NaN	NaN	NaN	NaN	3	NaN	NaN	0	3	3
664	'>gi|6005942|ref|NP_009057.1| transitional endoplasmic reticulum ATPase [Homo sapiens]'	NaN	NaN	NaN	3	NaN	NaN	NaN	NaN	0	3	3
665	'>gi|6041669|ref|NP_004538.2| NADH dehydrogenase [ubiquinone] 1 beta subcomplex subunit 4 isoform 1 [Homo sapiens]'	NaN	NaN	NaN	NaN	NaN	NaN	3	NaN	0	3	3
666	'>gi|63054868|ref|NP_001017964.1| UPF0249 protein ydjC homolog [Homo sapiens]'	NaN	NaN	NaN	NaN	NaN	NaN	NaN	3	0	3	3
667	'>gi|66363694|ref|NP_001018238.1| HCLS1-associated protein X-1 isoform b [Homo sapiens]'	NaN	NaN	NaN	NaN	3	NaN	NaN	NaN	0	3	3
668	'>gi|664806037|ref|NP_001287758.1| cold-inducible RNA-binding protein isoform 3 [Homo sapiens]'	NaN	NaN	NaN	NaN	NaN	NaN	3	NaN	0	3	3
669	'>gi|68509926|ref|NP_001349.2| putative pre-mRNA-splicing factor ATP-dependent RNA helicase DHX15 [Homo sapiens]'	NaN	NaN	NaN	3	NaN	NaN	NaN	NaN	0	3	3
670	'>gi|70778918|ref|NP_002207.2| inter-alpha-trypsin inhibitor heavy chain H2 precursor [Homo sapiens]'	NaN	NaN	3	NaN	NaN	NaN	NaN	NaN	0	3	3
671	'>gi|71979932|ref|NP_003477.4| large neutral amino acids transporter small subunit 1 [Homo sapiens]'	NaN	NaN	NaN	NaN	NaN	3	NaN	NaN	0	3	3
672	'>gi|7657015|ref|NP_055121.1| tRNA-splicing ligase RtcB homolog [Homo sapiens]'	NaN	NaN	NaN	NaN	3	NaN	NaN	NaN	0	3	3
673	'>gi|7661914|ref|NP_055629.1| 26S proteasome non-ATPase regulatory subunit 6 isoform 2 [Homo sapiens]'	NaN	NaN	NaN	NaN	NaN	3	NaN	NaN	0	3	3
674	'>gi|7661948|ref|NP_055545.1| malectin precursor [Homo sapiens]'	NaN	NaN	NaN	NaN	NaN	3	NaN	NaN	0	3	3
675	'>gi|7706343|ref|NP_057146.1| mitotic spindle-associated MMXD complex subunit MIP18 [Homo sapiens]'	NaN	NaN	NaN	NaN	NaN	NaN	3	NaN	0	3	3
676	'>gi|78214522|ref|NP_001030335.1| 60S ribosomal protein L38 [Homo sapiens]'	NaN	NaN	NaN	NaN	NaN	NaN	3	NaN	0	3	3
677	'>gi|8923421|ref|NP_060297.1| serine--tRNA ligase, mitochondrial isoform b precursor [Homo sapiens]'	NaN	NaN	NaN	NaN	3	NaN	NaN	NaN	0	3	3
678	'>gi|94681046|ref|NP_064569.3| metal transporter CNNM4 precursor [Homo sapiens]'	NaN	NaN	NaN	3	NaN	NaN	NaN	NaN	0	3	3
679	'>gi|9624998|ref|NP_062543.1| heterogeneous nuclear ribonucleoprotein H2 [Homo sapiens]'	NaN	NaN	NaN	NaN	3	NaN	NaN	NaN	0	3	3
680	'>gi|115298657|ref|NP_002954.2| protein S100-A7 [Homo sapiens]'	2	NaN	2	2	NaN	2	1	1	0	2	10
681	'>gi|260436922|ref|NP_001159506.1| suprabasin isoform 1 precursor [Homo sapiens]'	1	2	2	2	NaN	2	1	NaN	0	2	10
682	'>gi|4504253|ref|NP_002096.1| histone H2AX [Homo sapiens]'	NaN	2	NaN	2	NaN	2	2	NaN	0	2	8
683	'>gi|155722983|ref|NP_057376.2| heat shock protein 75 kDa, mitochondrial isoform 1 precursor [Homo sapiens]'	1	1	2	1	1	NaN	NaN	NaN	0	2	6
684	'>gi|226529917|ref|NP_001152759.1| triosephosphate isomerase isoform 2 [Homo sapiens]'	1	NaN	1	1	NaN	2	1	NaN	0	2	6
685	'>gi|4505931|ref|NP_002681.1| DNA polymerase beta [Homo sapiens]'	1	1	NaN	NaN	2	NaN	1	1	0	2	6
686	'>ST3-N-NSP1'	2	2	NaN	NaN	NaN	NaN	NaN	1	0	2	5
687	'>gi|110349786|ref|NP_055935.4| Alstrom syndrome protein 1 [Homo sapiens]'	1	NaN	NaN	NaN	NaN	NaN	2	1	0	2	4
688	'>gi|113722133|ref|NP_055861.3| probable helicase senataxin [Homo sapiens]'	NaN	NaN	NaN	NaN	2	2	NaN	NaN	0	2	4
689	'>gi|116268105|ref|NP_689565.2| protein FAM210A [Homo sapiens]'	NaN	NaN	NaN	NaN	NaN	2	2	NaN	0	2	4
690	'>gi|118572613|ref|NP_057417.3| serine/arginine repetitive matrix protein 2 [Homo sapiens]'	2	NaN	NaN	2	NaN	NaN	NaN	NaN	0	2	4
691	'>gi|119943112|ref|NP_001351.2| 7-dehydrocholesterol reductase [Homo sapiens]'	NaN	NaN	NaN	NaN	2	2	NaN	NaN	0	2	4
692	'>gi|15431290|ref|NP_000966.2| 60S ribosomal protein L11 isoform 1 [Homo sapiens]'	NaN	NaN	NaN	NaN	NaN	2	2	NaN	0	2	4
693	'>gi|195927006|ref|NP_001124319.1| apoptosis-inducing factor 1, mitochondrial isoform 5 precursor [Homo sapiens]'	1	2	NaN	NaN	NaN	NaN	1	NaN	0	2	4
694	'>gi|195963398|ref|NP_001124384.1| suppressor of G2 allele of SKP1 homolog isoform SGT1B [Homo sapiens]'	NaN	NaN	NaN	NaN	2	2	NaN	NaN	0	2	4
695	'>gi|21687129|ref|NP_660309.1| nudC domain-containing protein 2 [Homo sapiens]'	NaN	NaN	NaN	NaN	NaN	2	2	NaN	0	2	4
696	'>gi|306482646|ref|NP_001182356.1| serine/arginine-rich splicing factor 2 [Homo sapiens]'	2	1	1	NaN	NaN	NaN	NaN	NaN	0	2	4
697	'>gi|330340389|ref|NP_001193356.1| up-regulated during skeletal muscle growth protein 5 [Homo sapiens]'	NaN	NaN	NaN	NaN	NaN	NaN	2	2	0	2	4
698	'>gi|4503113|ref|NP_001314.1| cystatin-M precursor [Homo sapiens]'	1	NaN	NaN	NaN	NaN	NaN	2	1	0	2	4
699	'>gi|4504347|ref|NP_000549.1| hemoglobin subunit alpha [Homo sapiens]'	2	NaN	2	NaN	NaN	NaN	NaN	NaN	0	2	4
700	'>gi|4506625|ref|NP_000981.1| 60S ribosomal protein L27a [Homo sapiens]'	NaN	NaN	NaN	NaN	NaN	2	2	NaN	0	2	4
701	'>gi|4507879|ref|NP_003365.1| voltage-dependent anion-selective channel protein 1 [Homo sapiens]'	NaN	NaN	NaN	NaN	NaN	2	2	NaN	0	2	4
702	'>gi|45827701|ref|NP_005119.2| protein dopey-2 [Homo sapiens]'	NaN	2	2	NaN	NaN	NaN	NaN	NaN	0	2	4
703	'>gi|507834128|ref|NP_001002252.2| ADP-ribosylation factor-like protein 6-interacting protein 4 isoform 4 [Homo sapiens]'	2	2	NaN	NaN	NaN	NaN	NaN	NaN	0	2	4
704	'>gi|62460637|ref|NP_078934.3| importin-4 [Homo sapiens]'	NaN	NaN	2	2	NaN	NaN	NaN	NaN	0	2	4
705	'>gi|88853865|ref|NP_001034702.1| isoamyl acetate-hydrolyzing esterase 1 homolog precursor [Homo sapiens]'	NaN	2	2	NaN	NaN	NaN	NaN	NaN	0	2	4
706	'>gi|12408675|ref|NP_036526.2| prefoldin subunit 2 [Homo sapiens]'	NaN	NaN	NaN	NaN	NaN	1	2	NaN	0	2	3
707	'>gi|13676857|ref|NP_068814.2| heat shock-related 70 kDa protein 2 [Homo sapiens]'	NaN	NaN	NaN	1	2	NaN	NaN	NaN	0	2	3
708	'>gi|156564363|ref|NP_525125.2| tubulin alpha-3C/D chain [Homo sapiens]'	NaN	NaN	NaN	1	2	NaN	NaN	NaN	0	2	3
709	'>gi|19923967|ref|NP_612446.1| G-protein coupled receptor-associated sorting protein 2 [Homo sapiens]'	NaN	NaN	1	2	NaN	NaN	NaN	NaN	0	2	3
710	'>gi|20143480|ref|NP_003809.1| phosphatidate cytidylyltransferase 2 [Homo sapiens]'	NaN	NaN	NaN	NaN	2	1	NaN	NaN	0	2	3
711	'>gi|21361875|ref|NP_116249.2| protein LTV1 homolog [Homo sapiens]'	1	NaN	NaN	NaN	2	NaN	NaN	NaN	0	2	3
712	'>gi|219802857|ref|NP_001137315.1| transmembrane protein 106C isoform b [Homo sapiens]'	NaN	NaN	NaN	NaN	1	2	NaN	NaN	0	2	3
713	'>gi|239582772|ref|NP_078796.2| uncharacterized protein C2orf47, mitochondrial precursor [Homo sapiens]'	NaN	NaN	NaN	NaN	NaN	2	1	NaN	0	2	3
714	'>gi|261878552|ref|NP_001159889.1| afadin- and alpha-actinin-binding protein isoform 1 [Homo sapiens]'	NaN	NaN	NaN	2	1	NaN	NaN	NaN	0	2	3
715	'>gi|301601644|ref|NP_001180422.1| neutral amino acid transporter A isoform 2 precursor [Homo sapiens]'	NaN	NaN	NaN	1	2	NaN	NaN	NaN	0	2	3
716	'>gi|332164781|ref|NP_001193728.1| pyruvate kinase PKM isoform f [Homo sapiens]'	NaN	NaN	NaN	1	2	NaN	NaN	NaN	0	2	3
717	'>gi|382546190|ref|NP_001244264.1| ATP synthase subunit alpha, mitochondrial isoform c [Homo sapiens]'	NaN	NaN	1	NaN	NaN	2	NaN	NaN	0	2	3
718	'>gi|4502171|ref|NP_000476.1| adenine phosphoribosyltransferase isoform a [Homo sapiens]'	NaN	NaN	NaN	NaN	NaN	1	2	NaN	0	2	3
719	'>gi|4502281|ref|NP_001670.1| sodium/potassium-transporting ATPase subunit beta-3 [Homo sapiens]'	NaN	NaN	NaN	NaN	1	2	NaN	NaN	0	2	3
720	'>gi|4506597|ref|NP_000967.1| 60S ribosomal protein L12 [Homo sapiens]'	NaN	NaN	NaN	NaN	NaN	2	1	NaN	0	2	3
721	'>gi|4506901|ref|NP_003008.1| serine/arginine-rich splicing factor 3 [Homo sapiens]'	NaN	NaN	NaN	NaN	NaN	2	1	NaN	0	2	3
722	'>gi|4757988|ref|NP_004795.1| probable cytosolic iron-sulfur protein assembly protein CIAO1 [Homo sapiens]'	NaN	NaN	NaN	NaN	1	2	NaN	NaN	0	2	3
723	'>gi|4758256|ref|NP_004085.1| eukaryotic translation initiation factor 2 subunit 1 [Homo sapiens]'	NaN	1	NaN	NaN	NaN	2	NaN	NaN	0	2	3
724	'>gi|532524990|ref|NP_001269138.1| sigma non-opioid intracellular receptor 1 isoform 10 [Homo sapiens]'	NaN	NaN	NaN	NaN	NaN	1	2	NaN	0	2	3
725	'>gi|5729850|ref|NP_006487.1| guanine nucleotide-binding protein G(k) subunit alpha [Homo sapiens]'	NaN	NaN	NaN	NaN	2	1	NaN	NaN	0	2	3
726	'>gi|60499025|ref|NP_001012533.1| ferrochelatase, mitochondrial isoform a precursor [Homo sapiens]'	NaN	NaN	NaN	NaN	2	1	NaN	NaN	0	2	3
727	'>gi|68160922|ref|NP_001020242.1| 40S ribosomal protein S14 [Homo sapiens]'	NaN	NaN	NaN	NaN	NaN	1	2	NaN	0	2	3
728	'>gi|75677353|ref|NP_114127.3| ATPase family AAA domain-containing protein 3B [Homo sapiens]'	NaN	NaN	2	1	NaN	NaN	NaN	NaN	0	2	3
729	'>gi|94536848|ref|NP_060888.2| spermatogenesis-associated protein 7 isoform 1 [Homo sapiens]'	1	NaN	NaN	NaN	NaN	NaN	2	NaN	0	2	3
730	'>gi|9910382|ref|NP_064628.1| mitochondrial import receptor subunit TOM22 homolog [Homo sapiens]'	NaN	NaN	NaN	NaN	NaN	1	2	NaN	0	2	3
731	'>gi|10190712|ref|NP_065723.1| protein S100-A14 [Homo sapiens]'	NaN	NaN	NaN	NaN	NaN	2	NaN	NaN	0	2	2
732	'>gi|106775678|ref|NP_001035807.1| histone H2A type 2-A [Homo sapiens]'	2	NaN	NaN	NaN	NaN	NaN	NaN	NaN	0	2	2
733	'>gi|109689718|ref|NP_001035937.1| monoacylglycerol lipase ABHD12 isoform a [Homo sapiens]'	NaN	NaN	NaN	NaN	2	NaN	NaN	NaN	0	2	2
734	'>gi|116812591|ref|NP_008964.3| protein RER1 [Homo sapiens]'	NaN	NaN	NaN	NaN	NaN	NaN	2	NaN	0	2	2
735	'>gi|117168277|ref|NP_001070952.1| sodium-coupled neutral amino acid transporter 1 isoform 1 [Homo sapiens]'	NaN	NaN	NaN	2	NaN	NaN	NaN	NaN	0	2	2
736	'>gi|119964726|ref|NP_000867.2| cation-independent mannose-6-phosphate receptor precursor [Homo sapiens]'	NaN	2	NaN	NaN	NaN	NaN	NaN	NaN	0	2	2
737	'>gi|13124881|ref|NP_074036.1| core-binding factor subunit beta isoform 1 [Homo sapiens]'	NaN	NaN	NaN	NaN	NaN	2	NaN	NaN	0	2	2
738	'>gi|13128860|ref|NP_004955.2| histone deacetylase 1 [Homo sapiens]'	NaN	NaN	NaN	NaN	2	NaN	NaN	NaN	0	2	2
739	'>gi|13129016|ref|NP_076955.1| DET1- and DDB1-associated protein 1 [Homo sapiens]'	NaN	NaN	NaN	NaN	NaN	NaN	2	NaN	0	2	2
740	'>gi|13194195|ref|NP_055942.1| chloride channel CLIC-like protein 1 isoform 2 precursor [Homo sapiens]'	NaN	NaN	NaN	NaN	2	NaN	NaN	NaN	0	2	2
741	'>gi|13236579|ref|NP_077306.1| long-chain fatty acid transport protein 3 [Homo sapiens]'	NaN	NaN	NaN	2	NaN	NaN	NaN	NaN	0	2	2
742	'>gi|133925809|ref|NP_002208.3| inter-alpha-trypsin inhibitor heavy chain H3 preproprotein [Homo sapiens]'	NaN	NaN	2	NaN	NaN	NaN	NaN	NaN	0	2	2
743	'>gi|134133226|ref|NP_001077007.1| POTE ankyrin domain family member E [Homo sapiens]'	NaN	NaN	NaN	NaN	2	NaN	NaN	NaN	0	2	2
744	'>gi|13491166|ref|NP_055491.1| pumilio homolog 1 isoform 2 [Homo sapiens]'	NaN	NaN	2	NaN	NaN	NaN	NaN	NaN	0	2	2
745	'>gi|14042927|ref|NP_114405.1| MLN64 N-terminal domain homolog [Homo sapiens]'	NaN	NaN	NaN	NaN	NaN	2	NaN	NaN	0	2	2
746	'>gi|145580608|ref|NP_001077430.1| WD repeat-containing protein 62 isoform 1 [Homo sapiens]'	NaN	NaN	2	NaN	NaN	NaN	NaN	NaN	0	2	2
747	'>gi|148368978|ref|NP_689512.2| condensin-2 complex subunit H2 isoform 2 [Homo sapiens]'	NaN	NaN	NaN	2	NaN	NaN	NaN	NaN	0	2	2
748	'>gi|148727288|ref|NP_002327.2| low-density lipoprotein receptor-related protein 6 precursor [Homo sapiens]'	NaN	NaN	2	NaN	NaN	NaN	NaN	NaN	0	2	2
749	'>gi|149158696|ref|NP_001092004.1| large proline-rich protein BAG6 isoform b [Homo sapiens]'	NaN	NaN	2	NaN	NaN	NaN	NaN	NaN	0	2	2
750	'>gi|153252214|ref|NP_001092876.1| zinc transporter ZIP6 isoform 2 [Homo sapiens]'	NaN	NaN	NaN	NaN	2	NaN	NaN	NaN	0	2	2
751	'>gi|156142178|ref|NP_054886.2| thyroid transcription factor 1-associated protein 26 [Homo sapiens]'	NaN	NaN	NaN	NaN	NaN	2	NaN	NaN	0	2	2
752	'>gi|156415990|ref|NP_057066.2| Y-box-binding protein 2 [Homo sapiens]'	NaN	NaN	NaN	NaN	NaN	2	NaN	NaN	0	2	2
753	'>gi|156713442|ref|NP_001096137.1| proteasome subunit alpha type-4 isoform 1 [Homo sapiens]'	NaN	NaN	NaN	NaN	NaN	2	NaN	NaN	0	2	2
754	'>gi|157168349|ref|NP_001093254.2| F-box/LRR-repeat protein 19 isoform 1 [Homo sapiens]'	NaN	2	NaN	NaN	NaN	NaN	NaN	NaN	0	2	2
755	'>gi|157266264|ref|NP_942147.3| pleckstrin homology-like domain family B member 3 [Homo sapiens]'	NaN	NaN	NaN	2	NaN	NaN	NaN	NaN	0	2	2
756	'>gi|15890086|ref|NP_203699.1| collagen alpha-5(IV) chain isoform 2 precursor [Homo sapiens]'	NaN	NaN	NaN	NaN	2	NaN	NaN	NaN	0	2	2
757	'>gi|167234419|ref|NP_005110.2| thyroid hormone receptor-associated protein 3 [Homo sapiens]'	NaN	NaN	2	NaN	NaN	NaN	NaN	NaN	0	2	2
758	'>gi|169790833|ref|NP_001116078.1| lysosome-associated membrane glycoprotein 2 isoform C precursor [Homo sapiens]'	NaN	NaN	2	NaN	NaN	NaN	NaN	NaN	0	2	2
759	'>gi|170763508|ref|NP_001116295.1| general transcription factor 3C polypeptide 5 isoform 1 [Homo sapiens]'	NaN	NaN	NaN	NaN	2	NaN	NaN	NaN	0	2	2
760	'>gi|170763515|ref|NP_071443.2| doublesex- and mab-3-related transcription factor A1 [Homo sapiens]'	NaN	NaN	NaN	NaN	NaN	2	NaN	NaN	0	2	2
761	'>gi|17986258|ref|NP_066299.2| myosin light polypeptide 6 isoform 1 [Homo sapiens]'	NaN	NaN	NaN	NaN	NaN	NaN	2	NaN	0	2	2
762	'>gi|183227703|ref|NP_001116698.1| protein MTO1 homolog, mitochondrial isoform c [Homo sapiens]'	NaN	NaN	NaN	NaN	2	NaN	NaN	NaN	0	2	2
763	'>gi|18375648|ref|NP_542415.1| tyrosine-protein phosphatase non-receptor type 13 isoform 3 [Homo sapiens]'	NaN	2	NaN	NaN	NaN	NaN	NaN	NaN	0	2	2
764	'>gi|18378731|ref|NP_064620.2| HMG box transcription factor BBX isoform 2 [Homo sapiens]'	NaN	NaN	NaN	2	NaN	NaN	NaN	NaN	0	2	2
765	'>gi|187281616|ref|NP_077718.3| NADH dehydrogenase [ubiquinone] iron-sulfur protein 7, mitochondrial [Homo sapiens]'	NaN	NaN	NaN	NaN	NaN	NaN	2	NaN	0	2	2
766	'>gi|187608545|ref|NP_001120654.1| centrosomal protein of 55 kDa [Homo sapiens]'	NaN	NaN	NaN	NaN	2	NaN	NaN	NaN	0	2	2
767	'>gi|190014578|ref|NP_054735.3| phosphatidylinositide phosphatase SAC1 [Homo sapiens]'	NaN	NaN	NaN	NaN	2	NaN	NaN	NaN	0	2	2
768	'>gi|190885493|ref|NP_116287.2| centrosomal protein of 19 kDa [Homo sapiens]'	NaN	NaN	NaN	NaN	NaN	NaN	NaN	2	0	2	2
769	'>gi|193083114|ref|NP_001122386.1| poly(rC)-binding protein 2 isoform g [Homo sapiens]'	NaN	NaN	NaN	NaN	NaN	NaN	2	NaN	0	2	2
770	'>gi|194473724|ref|NP_001123996.1| AP-1 complex subunit mu-1 isoform 1 [Homo sapiens]'	NaN	NaN	NaN	NaN	2	NaN	NaN	NaN	0	2	2
771	'>gi|194688135|ref|NP_001124161.1| high mobility group protein B2 [Homo sapiens]'	2	NaN	NaN	NaN	NaN	NaN	NaN	NaN	0	2	2
772	'>gi|197116386|ref|NP_001127703.1| 5''-nucleotidase domain-containing protein 2 isoform 1 [Homo sapiens]'	NaN	NaN	NaN	NaN	2	NaN	NaN	NaN	0	2	2
773	'>gi|19923198|ref|NP_001745.2| runt-related transcription factor 1 isoform AML1c [Homo sapiens]'	NaN	NaN	NaN	NaN	2	NaN	NaN	NaN	0	2	2
774	'>gi|19924129|ref|NP_005723.2| DNA repair protein RAD50 [Homo sapiens]'	2	NaN	NaN	NaN	NaN	NaN	NaN	NaN	0	2	2
775	'>gi|20070344|ref|NP_079426.2| threonine--tRNA ligase, mitochondrial isoform a [Homo sapiens]'	NaN	NaN	NaN	2	NaN	NaN	NaN	NaN	0	2	2
776	'>gi|20149598|ref|NP_036272.2| mitochondrial dicarboxylate carrier isoform 2 [Homo sapiens]'	NaN	NaN	NaN	NaN	NaN	2	NaN	NaN	0	2	2
777	'>gi|207029415|ref|NP_001128727.1| histone-binding protein RBBP4 isoform b [Homo sapiens]'	NaN	NaN	NaN	NaN	2	NaN	NaN	NaN	0	2	2
778	'''>gi|209862760|ref|NP_001129470.1| NADH dehydrogenase [ubiquinone] 1 beta subcomplex subunit 11, mitochondrial isoform 2 [Homo sa...'' <Preview truncated at 128 characters>'	NaN	NaN	NaN	NaN	NaN	NaN	2	NaN	0	2	2
779	'>gi|209969838|ref|NP_001129668.1| transportin-2 isoform 1 [Homo sapiens]'	NaN	NaN	NaN	2	NaN	NaN	NaN	NaN	0	2	2
780	'>gi|21071001|ref|NP_001135.3| E3 ubiquitin-protein ligase AMFR [Homo sapiens]'	NaN	NaN	NaN	2	NaN	NaN	NaN	NaN	0	2	2
781	'>gi|21265093|ref|NP_115866.1| 39S ribosomal protein L41, mitochondrial [Homo sapiens]'	NaN	NaN	NaN	NaN	NaN	NaN	2	NaN	0	2	2
782	'>gi|21361659|ref|NP_060555.2| importin-9 [Homo sapiens]'	NaN	NaN	NaN	2	NaN	NaN	NaN	NaN	0	2	2
783	'>gi|214830079|ref|NP_001135766.1| spartin [Homo sapiens]'	NaN	NaN	NaN	2	NaN	NaN	NaN	NaN	0	2	2
784	'>gi|21536288|ref|NP_001815.2| creatine kinase M-type [Homo sapiens]'	NaN	NaN	2	NaN	NaN	NaN	NaN	NaN	0	2	2
785	'>gi|21536428|ref|NP_004618.2| tail-anchored protein insertion receptor WRB isoform 1 [Homo sapiens]'	NaN	NaN	NaN	NaN	NaN	NaN	2	NaN	0	2	2
786	'>gi|21536449|ref|NP_002613.2| prefoldin subunit 1 [Homo sapiens]'	NaN	NaN	NaN	NaN	NaN	NaN	2	NaN	0	2	2
787	'>gi|215983058|ref|NP_115497.4| magnesium transporter protein 1 [Homo sapiens]'	NaN	NaN	NaN	NaN	NaN	2	NaN	NaN	0	2	2
788	'>gi|22035696|ref|NP_004702.2| synaptogyrin-1 isoform 1a [Homo sapiens]'	NaN	NaN	NaN	NaN	NaN	NaN	2	NaN	0	2	2
789	'>gi|223890252|ref|NP_066973.2| glutamate receptor-interacting protein 1 isoform 1 [Homo sapiens]'	NaN	NaN	2	NaN	NaN	NaN	NaN	NaN	0	2	2
790	'>gi|224282119|ref|NP_001017392.2| SURP and G-patch domain-containing protein 2 [Homo sapiens]'	NaN	NaN	2	NaN	NaN	NaN	NaN	NaN	0	2	2
791	'>gi|224493847|ref|NP_001139013.1| T-complex protein 11-like protein 1 [Homo sapiens]'	NaN	NaN	NaN	NaN	2	NaN	NaN	NaN	0	2	2
792	'>gi|226246533|ref|NP_001139660.1| TOX high mobility group box family member 3 isoform 2 [Homo sapiens]'	NaN	NaN	NaN	2	NaN	NaN	NaN	NaN	0	2	2
793	'>gi|23510448|ref|NP_006730.2| DNA replication licensing factor MCM5 [Homo sapiens]'	NaN	NaN	NaN	2	NaN	NaN	NaN	NaN	0	2	2
794	'>gi|236459851|ref|NP_775840.3| ubinuclein-2 [Homo sapiens]'	NaN	2	NaN	NaN	NaN	NaN	NaN	NaN	0	2	2
795	'>gi|238231392|ref|NP_982272.2| dedicator of cytokinesis protein 8 isoform 1 [Homo sapiens]'	NaN	NaN	NaN	2	NaN	NaN	NaN	NaN	0	2	2
796	'>gi|24308201|ref|NP_065392.1| adipocyte plasma membrane-associated protein [Homo sapiens]'	NaN	NaN	NaN	NaN	2	NaN	NaN	NaN	0	2	2
797	'>gi|25188193|ref|NP_741995.1| ras-related protein Rab-39B [Homo sapiens]'	NaN	NaN	NaN	NaN	NaN	NaN	2	NaN	0	2	2
798	'>gi|255652947|ref|NP_001157394.1| V-set and immunoglobulin domain-containing protein 10-like precursor [Homo sapiens]'	NaN	NaN	NaN	NaN	NaN	2	NaN	NaN	0	2	2
799	'>gi|256222019|ref|NP_057215.3| ras-related protein Rab-10 [Homo sapiens]'	NaN	NaN	NaN	NaN	NaN	2	NaN	NaN	0	2	2
800	'>gi|25777713|ref|NP_733779.1| S-phase kinase-associated protein 1 isoform b [Homo sapiens]'	NaN	NaN	NaN	NaN	NaN	NaN	2	NaN	0	2	2
801	'>gi|258613875|ref|NP_056308.3| KN motif and ankyrin repeat domain-containing protein 2 isoform 1 [Homo sapiens]'	NaN	NaN	NaN	2	NaN	NaN	NaN	NaN	0	2	2
802	'>gi|261490708|ref|NP_001159776.1| phosphatidylinositol-glycan biosynthesis class X protein isoform 1 precursor [Homo sapiens]'	NaN	NaN	NaN	NaN	NaN	2	NaN	NaN	0	2	2
803	'>gi|27477134|ref|NP_079199.2| nuclear pore membrane glycoprotein 210 precursor [Homo sapiens]'	NaN	NaN	2	NaN	NaN	NaN	NaN	NaN	0	2	2
804	'>gi|27477136|ref|NP_064504.2| zinc finger CCCH-type antiviral protein 1 isoform 1 [Homo sapiens]'	NaN	NaN	NaN	2	NaN	NaN	NaN	NaN	0	2	2
805	'>gi|28076869|ref|NP_002965.1| serpin B4 isoform 1 [Homo sapiens]'	2	NaN	NaN	NaN	NaN	NaN	NaN	NaN	0	2	2
806	'>gi|28373115|ref|NP_777618.1| sarcoplasmic/endoplasmic reticulum calcium ATPase 3 isoform c [Homo sapiens]'	NaN	NaN	NaN	2	NaN	NaN	NaN	NaN	0	2	2
807	'>gi|284795266|ref|NP_067026.3| signal recognition particle receptor subunit beta [Homo sapiens]'	NaN	NaN	NaN	NaN	NaN	2	NaN	NaN	0	2	2
808	'>gi|288806587|ref|NP_001165774.1| serine/threonine-protein kinase greatwall isoform 1 [Homo sapiens]'	NaN	NaN	NaN	2	NaN	NaN	NaN	NaN	0	2	2
809	'>gi|29029591|ref|NP_803188.1| putative tRNA (cytidine(32)/guanosine(34)-2''-O)-methyltransferase isoform b [Homo sapiens]'	NaN	NaN	NaN	NaN	2	NaN	NaN	NaN	0	2	2
810	'>gi|29893557|ref|NP_003334.2| ubiquitin-conjugating enzyme E2 G2 isoform 1 [Homo sapiens]'	NaN	NaN	NaN	NaN	NaN	NaN	2	NaN	0	2	2
811	'>gi|299758465|ref|NP_073608.4| TBC1 domain family member 15 isoform 1 [Homo sapiens]'	NaN	NaN	NaN	2	NaN	NaN	NaN	NaN	0	2	2
812	'>gi|301171475|ref|NP_001180346.1| ATP-dependent RNA helicase DDX3X isoform 3 [Homo sapiens]'	NaN	NaN	2	NaN	NaN	NaN	NaN	NaN	0	2	2
813	'>gi|30795212|ref|NP_006538.2| insulin-like growth factor 2 mRNA-binding protein 3 [Homo sapiens]'	NaN	NaN	NaN	NaN	2	NaN	NaN	NaN	0	2	2
814	'>gi|31455614|ref|NP_057125.2| derlin-2 [Homo sapiens]'	NaN	NaN	NaN	NaN	NaN	NaN	2	NaN	0	2	2
815	'>gi|321267477|ref|NP_001189398.1| protein NipSnap homolog 2 isoform 2 [Homo sapiens]'	NaN	NaN	NaN	NaN	NaN	2	NaN	NaN	0	2	2
816	'>gi|323276700|ref|NP_001191020.1| 40S ribosomal protein S10 [Homo sapiens]'	NaN	NaN	NaN	NaN	NaN	NaN	2	NaN	0	2	2
817	'>gi|32483416|ref|NP_066554.2| neurofilament heavy polypeptide [Homo sapiens]'	NaN	NaN	2	NaN	NaN	NaN	NaN	NaN	0	2	2
818	'>gi|325652048|ref|NP_001191793.1| transcription elongation factor B polypeptide 1 isoform b [Homo sapiens]'	NaN	NaN	NaN	NaN	NaN	2	NaN	NaN	0	2	2
819	'>gi|326381123|ref|NP_001191948.1| glycerol kinase isoform d [Homo sapiens]'	NaN	NaN	NaN	NaN	2	NaN	NaN	NaN	0	2	2
820	'>gi|32698700|ref|NP_055922.1| histone lysine demethylase PHF8 isoform 2 [Homo sapiens]'	NaN	NaN	NaN	NaN	NaN	NaN	NaN	2	0	2	2
821	'>gi|338827763|ref|NP_001229791.1| cAMP-dependent protein kinase catalytic subunit beta isoform 9 [Homo sapiens]'	NaN	NaN	NaN	NaN	2	NaN	NaN	NaN	0	2	2
822	'>gi|33946291|ref|NP_079106.3| lysophosphatidylcholine acyltransferase 1 [Homo sapiens]'	NaN	NaN	NaN	NaN	2	NaN	NaN	NaN	0	2	2
823	'>gi|34098946|ref|NP_004550.2| nuclease-sensitive element-binding protein 1 [Homo sapiens]'	NaN	NaN	NaN	NaN	2	NaN	NaN	NaN	0	2	2
824	'>gi|351722051|ref|NP_001234937.1| ski-like protein isoform 1 [Homo sapiens]'	NaN	NaN	NaN	NaN	NaN	2	NaN	NaN	0	2	2
825	'>gi|371122551|ref|NP_001243053.1| tripartite motif-containing protein 65 isoform 2 [Homo sapiens]'	NaN	NaN	NaN	NaN	2	NaN	NaN	NaN	0	2	2
826	'>gi|371940940|ref|NP_001243143.1| sodium/potassium-transporting ATPase subunit alpha-3 isoform 3 [Homo sapiens]'	2	NaN	NaN	NaN	NaN	NaN	NaN	NaN	0	2	2
827	'>gi|374671789|ref|NP_001243442.1| single-stranded DNA-binding protein, mitochondrial precursor [Homo sapiens]'	NaN	NaN	NaN	NaN	NaN	NaN	2	NaN	0	2	2
828	'>gi|38016937|ref|NP_055731.2| serine/threonine-protein kinase LMTK2 precursor [Homo sapiens]'	NaN	NaN	2	NaN	NaN	NaN	NaN	NaN	0	2	2
829	'>gi|38045913|ref|NP_937818.1| nucleoside diphosphate kinase A isoform a [Homo sapiens]'	NaN	NaN	NaN	NaN	NaN	NaN	2	NaN	0	2	2
830	'''>gi|380848751|ref|NP_001244160.1| putative bifunctional UDP-N-acetylglucosamine transferase and deubiquitinase ALG13 isoform 6 [...'' <Preview truncated at 128 characters>'	NaN	NaN	2	NaN	NaN	NaN	NaN	NaN	0	2	2
831	'>gi|38176300|ref|NP_006608.1| nestin [Homo sapiens]'	NaN	NaN	2	NaN	NaN	NaN	NaN	NaN	0	2	2
832	'>gi|38201623|ref|NP_937884.1| eukaryotic translation initiation factor 4 gamma 1 isoform 5 [Homo sapiens]'	NaN	NaN	2	NaN	NaN	NaN	NaN	NaN	0	2	2
833	'>gi|390131988|ref|NP_001254523.1| sentrin-specific protease 1 [Homo sapiens]'	NaN	NaN	NaN	NaN	2	NaN	NaN	NaN	0	2	2
834	'>gi|394582099|ref|NP_001257401.1| DNA replication licensing factor MCM3 isoform 2 [Homo sapiens]'	NaN	NaN	NaN	2	NaN	NaN	NaN	NaN	0	2	2
835	'>gi|39777586|ref|NP_945314.1| putative ATP-dependent RNA helicase DHX57 [Homo sapiens]'	NaN	NaN	2	NaN	NaN	NaN	NaN	NaN	0	2	2
836	'>gi|40255047|ref|NP_079203.3| pleckstrin homology domain-containing family H member 3 precursor [Homo sapiens]'	NaN	NaN	NaN	2	NaN	NaN	NaN	NaN	0	2	2
837	'>gi|40288288|ref|NP_954592.1| histone-arginine methyltransferase CARM1 [Homo sapiens]'	NaN	NaN	NaN	NaN	2	NaN	NaN	NaN	0	2	2
838	'>gi|41281447|ref|NP_055529.2| intraflagellar transport protein 140 homolog [Homo sapiens]'	NaN	NaN	2	NaN	NaN	NaN	NaN	NaN	0	2	2
839	'>gi|42558279|ref|NP_817124.1| tubulin beta-8 chain [Homo sapiens]'	NaN	NaN	NaN	NaN	2	NaN	NaN	NaN	0	2	2
840	'>gi|4501987|ref|NP_001124.1| afamin precursor [Homo sapiens]'	NaN	NaN	NaN	NaN	NaN	NaN	NaN	2	0	2	2
841	'>gi|4501989|ref|NP_001125.1| alpha-fetoprotein precursor [Homo sapiens]'	NaN	NaN	2	NaN	NaN	NaN	NaN	NaN	0	2	2
842	'>gi|4502003|ref|NP_001612.1| aryl hydrocarbon receptor precursor [Homo sapiens]'	NaN	NaN	NaN	2	NaN	NaN	NaN	NaN	0	2	2
843	'>gi|4502277|ref|NP_001668.1| sodium/potassium-transporting ATPase subunit beta-1 [Homo sapiens]'	NaN	NaN	NaN	NaN	2	NaN	NaN	NaN	0	2	2
844	'>gi|4502847|ref|NP_001271.1| cold-inducible RNA-binding protein isoform 1 [Homo sapiens]'	NaN	NaN	NaN	NaN	NaN	2	NaN	NaN	0	2	2
845	'>gi|4503123|ref|NP_001892.1| connective tissue growth factor precursor [Homo sapiens]'	2	NaN	NaN	NaN	NaN	NaN	NaN	NaN	0	2	2
846	'>gi|4503453|ref|NP_003783.1| endothelial differentiation-related factor 1 isoform alpha [Homo sapiens]'	2	NaN	NaN	NaN	NaN	NaN	NaN	NaN	0	2	2
847	'>gi|4504771|ref|NP_002203.1| eukaryotic translation initiation factor 6 isoform a [Homo sapiens]'	NaN	NaN	NaN	NaN	NaN	2	NaN	NaN	0	2	2
848	'>gi|4505219|ref|NP_002414.1| matrilysin preproprotein [Homo sapiens]'	NaN	NaN	NaN	NaN	NaN	2	NaN	NaN	0	2	2
849	'>gi|4506007|ref|NP_002701.1| serine/threonine-protein phosphatase PP1-gamma catalytic subunit isoform 1 [Homo sapiens]'	NaN	NaN	NaN	NaN	NaN	2	NaN	NaN	0	2	2
850	'>gi|4506685|ref|NP_001008.1| 40S ribosomal protein S13 [Homo sapiens]'	NaN	NaN	NaN	NaN	NaN	NaN	2	NaN	0	2	2
851	'>gi|4507951|ref|NP_003396.1| 14-3-3 protein eta [Homo sapiens]'	NaN	NaN	NaN	NaN	NaN	2	NaN	NaN	0	2	2
852	'>gi|4557321|ref|NP_000030.1| apolipoprotein A-I preproprotein [Homo sapiens]'	NaN	NaN	NaN	2	NaN	NaN	NaN	NaN	0	2	2
853	'>gi|4557791|ref|NP_000425.1| sialidase-1 precursor [Homo sapiens]'	NaN	NaN	NaN	NaN	2	NaN	NaN	NaN	0	2	2
854	'>gi|45827690|ref|NP_996749.1| transcription regulator protein BACH1 [Homo sapiens]'	NaN	NaN	NaN	2	NaN	NaN	NaN	NaN	0	2	2
855	'''>gi|46909600|ref|NP_997080.1| disintegrin and metalloproteinase domain-containing protein 15 isoform 6 preproprotein [Homo sapie...'' <Preview truncated at 128 characters>'	NaN	NaN	NaN	2	NaN	NaN	NaN	NaN	0	2	2
856	'>gi|4758032|ref|NP_004757.1| coatomer subunit beta'' [Homo sapiens]'	NaN	NaN	NaN	2	NaN	NaN	NaN	NaN	0	2	2
857	'>gi|4758302|ref|NP_004441.1| enhancer of rudimentary homolog [Homo sapiens]'	NaN	NaN	NaN	NaN	NaN	NaN	2	NaN	0	2	2
858	'>gi|47717104|ref|NP_057025.2| V-type proton ATPase subunit H isoform 1 [Homo sapiens]'	NaN	NaN	NaN	NaN	2	NaN	NaN	NaN	0	2	2
859	'>gi|4885049|ref|NP_005150.1| actin, alpha cardiac muscle 1 proprotein [Homo sapiens]'	NaN	NaN	NaN	NaN	NaN	2	NaN	NaN	0	2	2
860	'>gi|4885065|ref|NP_005157.1| amyloid-like protein 1 isoform 2 precursor [Homo sapiens]'	NaN	NaN	NaN	2	NaN	NaN	NaN	NaN	0	2	2
861	'>gi|4885377|ref|NP_005311.1| histone H1.3 [Homo sapiens]'	2	NaN	NaN	NaN	NaN	NaN	NaN	NaN	0	2	2
862	'>gi|4885393|ref|NP_005321.1| hemoglobin subunit epsilon [Homo sapiens]'	NaN	NaN	NaN	NaN	NaN	NaN	2	NaN	0	2	2
863	'>gi|50345991|ref|NP_001001975.1| ATP synthase subunit delta, mitochondrial precursor [Homo sapiens]'	NaN	NaN	NaN	NaN	NaN	NaN	2	NaN	0	2	2
864	'>gi|508083057|ref|NP_001265318.1| sodium-coupled neutral amino acid transporter 1 isoform 1 [Homo sapiens]'	NaN	NaN	NaN	NaN	2	NaN	NaN	NaN	0	2	2
865	'>gi|51479152|ref|NP_001003785.1| ATP synthase subunit d, mitochondrial isoform b [Homo sapiens]'	NaN	NaN	NaN	NaN	NaN	NaN	2	NaN	0	2	2
866	'>gi|5174613|ref|NP_005960.1| nucleosome assembly protein 1-like 4 [Homo sapiens]'	NaN	NaN	NaN	NaN	2	NaN	NaN	NaN	0	2	2
867	'>gi|518831687|ref|NP_001265532.1| nucleoporin p54 isoform 2 [Homo sapiens]'	NaN	NaN	NaN	NaN	2	NaN	NaN	NaN	0	2	2
868	'>gi|521258690|ref|NP_001265585.1| small nuclear ribonucleoprotein Sm D3 [Homo sapiens]'	NaN	NaN	NaN	NaN	NaN	NaN	2	NaN	0	2	2
869	'>gi|525507390|ref|NP_112598.3| epiplakin [Homo sapiens]'	2	NaN	NaN	NaN	NaN	NaN	NaN	NaN	0	2	2
870	'>gi|526118069|ref|NP_001267473.1| zinc finger protein DPF3 isoform 4 [Homo sapiens]'	2	NaN	NaN	NaN	NaN	NaN	NaN	NaN	0	2	2
871	'>gi|530379665|ref|XP_005271929.1| PREDICTED: AP-3 complex subunit sigma-1 isoform X2 [Homo sapiens]'	NaN	NaN	NaN	NaN	NaN	NaN	2	NaN	0	2	2
872	'>gi|530380502|ref|XP_005268480.1| PREDICTED: glucocorticoid receptor isoform X5 [Homo sapiens]'	NaN	NaN	NaN	2	NaN	NaN	NaN	NaN	0	2	2
873	'>gi|530381027|ref|XP_005265958.1| PREDICTED: heterogeneous nuclear ribonucleoprotein H isoform X7 [Homo sapiens]'	NaN	NaN	NaN	NaN	2	NaN	NaN	NaN	0	2	2
874	'>gi|530382446|ref|XP_005249381.1| PREDICTED: dystonin isoform X15 [Homo sapiens]'	NaN	2	NaN	NaN	NaN	NaN	NaN	NaN	0	2	2
875	'>gi|530391682|ref|XP_005252323.1| PREDICTED: centrosomal protein of 78 kDa isoform X4 [Homo sapiens]'	NaN	NaN	NaN	2	NaN	NaN	NaN	NaN	0	2	2
876	'>gi|530401235|ref|XP_005253911.1| PREDICTED: coiled-coil domain-containing protein 60 isoform X1 [Homo sapiens]'	NaN	NaN	NaN	NaN	2	NaN	NaN	NaN	0	2	2
877	'>gi|530410380|ref|XP_005256727.1| PREDICTED: gem-associated protein 4 isoform X4 [Homo sapiens]'	NaN	NaN	NaN	2	NaN	NaN	NaN	NaN	0	2	2
878	'>gi|530412344|ref|XP_005257481.1| PREDICTED: 28S ribosomal protein S7, mitochondrial isoform X1 [Homo sapiens]'	NaN	NaN	NaN	NaN	NaN	2	NaN	NaN	0	2	2
879	'>gi|530413510|ref|XP_005256420.1| PREDICTED: COP9 signalosome complex subunit 1 isoform X14 [Homo sapiens]'	NaN	NaN	NaN	NaN	2	NaN	NaN	NaN	0	2	2
880	'>gi|530420151|ref|XP_005261691.1| PREDICTED: phosphatidylinositol 4-kinase alpha isoform X1 [Homo sapiens]'	NaN	NaN	2	NaN	NaN	NaN	NaN	NaN	0	2	2
881	'>gi|530424701|ref|XP_005256355.1| PREDICTED: transcription factor 25 isoform X2 [Homo sapiens]'	NaN	NaN	NaN	NaN	2	NaN	NaN	NaN	0	2	2
882	'>gi|53759151|ref|NP_005054.3| acyl-CoA desaturase [Homo sapiens]'	NaN	NaN	NaN	NaN	NaN	2	NaN	NaN	0	2	2
883	'>gi|538921154|ref|NP_001269348.1| NADH dehydrogenase [ubiquinone] 1 alpha subcomplex subunit 5 isoform 2 [Homo sapiens]'	NaN	NaN	NaN	NaN	NaN	NaN	2	NaN	0	2	2
884	'>gi|543583787|ref|NP_001269472.1| BRCA1-associated RING domain protein 1 isoform 2 [Homo sapiens]'	NaN	NaN	NaN	2	NaN	NaN	NaN	NaN	0	2	2
885	'>gi|544063449|ref|NP_001269582.1| stress-induced-phosphoprotein 1 isoform c [Homo sapiens]'	NaN	NaN	NaN	NaN	2	NaN	NaN	NaN	0	2	2
886	'>gi|5453559|ref|NP_006347.1| ATP synthase subunit d, mitochondrial isoform a [Homo sapiens]'	NaN	NaN	NaN	NaN	NaN	2	NaN	NaN	0	2	2
887	'>gi|5454052|ref|NP_006133.1| 14-3-3 protein sigma [Homo sapiens]'	NaN	NaN	NaN	NaN	NaN	2	NaN	NaN	0	2	2
888	'>gi|545746373|ref|NP_001271151.1| elongator complex protein 3 isoform 3 [Homo sapiens]'	NaN	NaN	NaN	NaN	2	NaN	NaN	NaN	0	2	2
889	'>gi|554506526|ref|NP_001273013.1| tRNA methyltransferase 112 homolog isoform 3 [Homo sapiens]'	NaN	NaN	NaN	NaN	NaN	NaN	2	NaN	0	2	2
890	'>gi|55749577|ref|NP_001142.2| ADP/ATP translocase 1 [Homo sapiens]'	NaN	NaN	NaN	NaN	NaN	2	NaN	NaN	0	2	2
891	'>gi|55956921|ref|NP_004490.2| heterogeneous nuclear ribonucleoprotein A/B isoform b [Homo sapiens]'	NaN	NaN	NaN	NaN	2	NaN	NaN	NaN	0	2	2
892	'>gi|56243583|ref|NP_077005.2| WD repeat-containing protein 18 [Homo sapiens]'	NaN	NaN	NaN	NaN	2	NaN	NaN	NaN	0	2	2
893	'>gi|564730689|ref|NP_001274176.1| Bloom syndrome protein isoform 2 [Homo sapiens]'	NaN	NaN	NaN	2	NaN	NaN	NaN	NaN	0	2	2
894	'>gi|565324143|ref|NP_115804.1| FERM and PDZ domain-containing protein 3 [Homo sapiens]'	NaN	NaN	2	NaN	NaN	NaN	NaN	NaN	0	2	2
895	'>gi|56699409|ref|NP_002130.2| RNA-binding motif protein, X chromosome isoform 1 [Homo sapiens]'	NaN	NaN	NaN	NaN	2	NaN	NaN	NaN	0	2	2
896	'>gi|56788364|ref|NP_065194.2| gamma-tubulin complex component 6 [Homo sapiens]'	NaN	NaN	2	NaN	NaN	NaN	NaN	NaN	0	2	2
897	'>gi|5729909|ref|NP_006542.1| secretoglobin family 1D member 2 precursor [Homo sapiens]'	NaN	NaN	NaN	NaN	NaN	2	NaN	NaN	0	2	2
898	'>gi|573014787|ref|NP_001275935.1| transmembrane 9 superfamily member 1 isoform c [Homo sapiens]'	NaN	NaN	NaN	NaN	2	NaN	NaN	NaN	0	2	2
899	'>gi|577019580|ref|NP_001276753.1| furin preproprotein [Homo sapiens]'	NaN	NaN	NaN	2	NaN	NaN	NaN	NaN	0	2	2
900	'>gi|578811764|ref|XP_006715191.1| PREDICTED: threonylcarbamoyladenosine tRNA methylthiotransferase isoform X2 [Homo sapiens]'	NaN	NaN	NaN	NaN	2	NaN	NaN	NaN	0	2	2
901	'>gi|578813594|ref|XP_006715827.1| PREDICTED: actin, cytoplasmic 1 isoform X1 [Homo sapiens]'	NaN	2	NaN	NaN	NaN	NaN	NaN	NaN	0	2	2
902	'>gi|578819376|ref|XP_006717880.1| PREDICTED: heterogeneous nuclear ribonucleoprotein H3 isoform X9 [Homo sapiens]'	NaN	NaN	NaN	NaN	2	NaN	NaN	NaN	0	2	2
903	'>gi|578827172|ref|XP_006720663.1| PREDICTED: HAUS augmin-like complex subunit 2 isoform X1 [Homo sapiens]'	NaN	NaN	NaN	NaN	NaN	2	NaN	NaN	0	2	2
904	'>gi|578829770|ref|XP_006721537.1| PREDICTED: rho guanine nucleotide exchange factor 15 isoform X3 [Homo sapiens]'	NaN	NaN	NaN	NaN	NaN	NaN	NaN	2	0	2	2
905	'>gi|578836248|ref|XP_006723956.1| PREDICTED: RNA-binding protein 39 isoform X4 [Homo sapiens]'	NaN	NaN	NaN	NaN	2	NaN	NaN	NaN	0	2	2
906	'>gi|5803048|ref|NP_006792.1| ER lumen protein-retaining receptor 1 [Homo sapiens]'	NaN	NaN	NaN	NaN	NaN	NaN	2	NaN	0	2	2
907	'>gi|58761506|ref|NP_001011699.1| HAUS augmin-like complex subunit 8 isoform b [Homo sapiens]'	NaN	NaN	NaN	NaN	2	NaN	NaN	NaN	0	2	2
908	'>gi|5901912|ref|NP_008819.1| calmodulin [Homo sapiens]'	NaN	NaN	NaN	NaN	NaN	2	NaN	NaN	0	2	2
909	'>gi|612407802|ref|NP_001278413.1| carcinoembryonic antigen-related cell adhesion molecule 5 preproprotein [Homo sapiens]'	NaN	NaN	NaN	NaN	NaN	2	NaN	NaN	0	2	2
910	'>gi|618466461|ref|NP_001278590.1| dynein heavy chain 12, axonemal isoform 3 [Homo sapiens]'	NaN	NaN	NaN	NaN	2	NaN	NaN	NaN	0	2	2
911	'>gi|631226406|ref|NP_001278825.1| ras-related protein Rap-1A precursor [Homo sapiens]'	NaN	NaN	NaN	NaN	NaN	2	NaN	NaN	0	2	2
912	'>gi|662236737|ref|NP_001284529.1| hsp70-binding protein 1 isoform 1 [Homo sapiens]'	NaN	NaN	NaN	NaN	2	NaN	NaN	NaN	0	2	2
913	'>gi|663071176|ref|NP_001284694.1| centrin-3 isoform 1 [Homo sapiens]'	NaN	NaN	NaN	NaN	NaN	NaN	2	NaN	0	2	2
914	'>gi|66346695|ref|NP_001990.2| fibrillin-2 precursor [Homo sapiens]'	NaN	2	NaN	NaN	NaN	NaN	NaN	NaN	0	2	2
915	'>gi|667667691|ref|NP_001288092.1| transmembrane protein 209 isoform 2 [Homo sapiens]'	NaN	NaN	NaN	NaN	2	NaN	NaN	NaN	0	2	2
916	'>gi|667667715|ref|NP_001288104.1| ubiquitin carboxyl-terminal hydrolase 30 isoform 2 [Homo sapiens]'	NaN	NaN	NaN	NaN	2	NaN	NaN	NaN	0	2	2
917	'>gi|70167032|ref|NP_056656.2| double-stranded RNA-specific adenosine deaminase isoform c [Homo sapiens]'	NaN	NaN	NaN	2	NaN	NaN	NaN	NaN	0	2	2
918	'>gi|70167113|ref|NP_001020278.1| double-stranded RNA-specific adenosine deaminase isoform d [Homo sapiens]'	NaN	NaN	2	NaN	NaN	NaN	NaN	NaN	0	2	2
919	'>gi|71143156|ref|NP_001025034.1| UPF0669 protein C6orf120 precursor [Homo sapiens]'	NaN	NaN	NaN	NaN	NaN	2	NaN	NaN	0	2	2
920	'>gi|72534712|ref|NP_001026881.1| endoplasmic reticulum-Golgi intermediate compartment protein 1 [Homo sapiens]'	NaN	NaN	NaN	NaN	NaN	2	NaN	NaN	0	2	2
921	'>gi|7657381|ref|NP_055317.1| pre-mRNA-processing factor 19 [Homo sapiens]'	NaN	NaN	NaN	NaN	2	NaN	NaN	NaN	0	2	2
922	'>gi|7657683|ref|NP_055146.1| cystine/glutamate transporter [Homo sapiens]'	NaN	NaN	NaN	NaN	NaN	2	NaN	NaN	0	2	2
923	'>gi|7661592|ref|NP_054753.1| histone chaperone ASF1A [Homo sapiens]'	NaN	NaN	NaN	NaN	NaN	2	NaN	NaN	0	2	2
924	'>gi|7661786|ref|NP_054884.1| NADH dehydrogenase [ubiquinone] 1 alpha subcomplex assembly factor 4 [Homo sapiens]'	NaN	NaN	NaN	NaN	NaN	2	NaN	NaN	0	2	2
925	'>gi|7662276|ref|NP_055534.1| protein FAM115A isoform 1 [Homo sapiens]'	NaN	NaN	NaN	2	NaN	NaN	NaN	NaN	0	2	2
926	'>gi|7706200|ref|NP_057731.1| protein THEM6 precursor [Homo sapiens]'	NaN	NaN	NaN	NaN	NaN	NaN	2	NaN	0	2	2
927	'>gi|7706495|ref|NP_057390.1| dnaJ homolog subfamily B member 11 precursor [Homo sapiens]'	NaN	NaN	NaN	NaN	2	NaN	NaN	NaN	0	2	2
928	'>gi|85068512|ref|NP_599151.2| RISC-loading complex subunit TARBP2 isoform b [Homo sapiens]'	NaN	NaN	NaN	NaN	2	NaN	NaN	NaN	0	2	2
929	'>gi|8922328|ref|NP_060517.1| pre-mRNA-splicing factor RBM22 [Homo sapiens]'	NaN	NaN	NaN	NaN	2	NaN	NaN	NaN	0	2	2
930	'>gi|89886480|ref|NP_001034966.1| striatin-4 isoform 2 [Homo sapiens]'	NaN	NaN	NaN	2	NaN	NaN	NaN	NaN	0	2	2
931	'>gi|92091575|ref|NP_932348.2| coiled-coil domain-containing protein 57 [Homo sapiens]'	NaN	NaN	NaN	2	NaN	NaN	NaN	NaN	0	2	2
932	'>gi|99028881|ref|NP_078902.2| V-set domain-containing T-cell activation inhibitor 1 isoform 1 precursor [Homo sapiens]'	NaN	NaN	NaN	NaN	NaN	2	NaN	NaN	0	2	2
933	'>gi|16507950|ref|NP_055281.2| tektin-2 [Homo sapiens]'	NaN	NaN	NaN	NaN	1	1	1	1	0	1	4
934	'>gi|17921989|ref|NP_005991.1| tubulin alpha-4A chain isoform 1 [Homo sapiens]'	NaN	NaN	1	NaN	1	NaN	1	1	0	1	4
935	'>gi|5174415|ref|NP_006081.1| choline/ethanolaminephosphotransferase 1 [Homo sapiens]'	NaN	NaN	NaN	NaN	1	1	1	NaN	0	1	3
936	'>ETD-N-NSP1'	NaN	NaN	NaN	1	NaN	1	NaN	NaN	0	1	2
937	'>RRV5'	NaN	NaN	NaN	NaN	1	1	NaN	NaN	0	1	2
938	'>gi|13376162|ref|NP_079068.1| protein FAM57A [Homo sapiens]'	NaN	NaN	NaN	NaN	NaN	1	1	NaN	0	1	2
939	'>gi|13904870|ref|NP_001000.2| 40S ribosomal protein S5 [Homo sapiens]'	NaN	NaN	NaN	NaN	NaN	1	1	NaN	0	1	2
940	'>gi|145701015|ref|NP_001077425.1| zinc finger protein 655 isoform f [Homo sapiens]'	NaN	NaN	NaN	1	1	NaN	NaN	NaN	0	1	2
941	'>gi|154759421|ref|NP_001527.3| protein arginine N-methyltransferase 1 isoform 1 [Homo sapiens]'	NaN	NaN	NaN	NaN	1	1	NaN	NaN	0	1	2
942	'>gi|189011550|ref|NP_001120977.1| acid ceramidase isoform c [Homo sapiens]'	NaN	NaN	NaN	NaN	1	1	NaN	NaN	0	1	2
943	'>gi|21464101|ref|NP_036611.2| 14-3-3 protein gamma [Homo sapiens]'	NaN	NaN	NaN	1	NaN	1	NaN	NaN	0	1	2
944	'>gi|223468566|ref|NP_001138617.1| neutral amino acid transporter B(0) isoform 3 [Homo sapiens]'	NaN	NaN	NaN	NaN	NaN	1	1	NaN	0	1	2
945	'>gi|30520329|ref|NP_848934.1| glycerol-3-phosphate acyltransferase 6 [Homo sapiens]'	NaN	NaN	NaN	NaN	1	1	NaN	NaN	0	1	2
946	'>gi|38176283|ref|NP_937886.1| ankyrin repeat and SOCS box protein 7 isoform 2 [Homo sapiens]'	NaN	NaN	NaN	NaN	1	1	NaN	NaN	0	1	2
947	'>gi|392513662|ref|NP_001254738.1| interleukin enhancer-binding factor 2 isoform 2 [Homo sapiens]'	NaN	NaN	NaN	NaN	1	1	NaN	NaN	0	1	2
948	'>gi|4506619|ref|NP_000977.1| 60S ribosomal protein L24 [Homo sapiens]'	1	NaN	NaN	NaN	NaN	1	NaN	NaN	0	1	2
949	'>gi|4557617|ref|NP_000811.1| growth arrest-specific protein 6 precursor [Homo sapiens]'	NaN	NaN	NaN	1	1	NaN	NaN	NaN	0	1	2
950	'>gi|6005884|ref|NP_009038.1| translocon-associated protein subunit gamma [Homo sapiens]'	NaN	NaN	NaN	NaN	NaN	1	1	NaN	0	1	2
951	'>gi|663070994|ref|NP_001284644.1| survival motor neuron protein isoform a [Homo sapiens]'	NaN	NaN	NaN	NaN	1	1	NaN	NaN	0	1	2
952	'>gi|6715607|ref|NP_000175.1| hemoglobin subunit gamma-2 [Homo sapiens]'	1	NaN	NaN	1	NaN	NaN	NaN	NaN	0	1	2
953	'>gi|8923763|ref|NP_060874.1| arf-GAP with dual PH domain-containing protein 2 [Homo sapiens]'	NaN	1	1	NaN	NaN	NaN	NaN	NaN	0	1	2
954	'>NSP1 RRV-5, 501aa'	NaN	NaN	NaN	NaN	1	NaN	NaN	NaN	0	1	1
955	'>RRV-n-NSP1'	1	NaN	NaN	NaN	NaN	NaN	NaN	NaN	0	1	1
956	'>gi|102467481|ref|NP_060421.2| sphingomyelin phosphodiesterase 4 isoform 2 [Homo sapiens]'	NaN	NaN	NaN	1	NaN	NaN	NaN	NaN	0	1	1
957	'>gi|105990541|ref|NP_000341.2| retinal-specific ATP-binding cassette transporter [Homo sapiens]'	NaN	NaN	NaN	NaN	NaN	NaN	NaN	1	0	1	1
958	'>gi|10863927|ref|NP_066953.1| peptidyl-prolyl cis-trans isomerase A isoform 1 [Homo sapiens]'	NaN	NaN	NaN	NaN	NaN	NaN	1	NaN	0	1	1
959	'>gi|10880989|ref|NP_067075.1| ras-related protein Rab-18 isoform 1 [Homo sapiens]'	NaN	NaN	NaN	NaN	NaN	NaN	1	NaN	0	1	1
960	'>gi|109134349|ref|NP_036265.3| coatomer subunit gamma-2 isoform 1 [Homo sapiens]'	NaN	NaN	NaN	1	NaN	NaN	NaN	NaN	0	1	1
961	'>gi|11024700|ref|NP_036590.1| mitochondrial import inner membrane translocase subunit Tim13 [Homo sapiens]'	NaN	NaN	NaN	NaN	NaN	NaN	1	NaN	0	1	1
962	'>gi|110349756|ref|NP_001036013.1| fasciculation and elongation protein zeta-2 isoform 2 [Homo sapiens]'	NaN	NaN	NaN	NaN	1	NaN	NaN	NaN	0	1	1
963	'>gi|110349772|ref|NP_000079.2| collagen alpha-1(I) chain preproprotein [Homo sapiens]'	NaN	NaN	1	NaN	NaN	NaN	NaN	NaN	0	1	1
964	'>gi|110611226|ref|NP_006368.3| protein unc-13 homolog B [Homo sapiens]'	NaN	1	NaN	NaN	NaN	NaN	NaN	NaN	0	1	1
965	'>gi|11128019|ref|NP_061820.1| cytochrome c [Homo sapiens]'	1	NaN	NaN	NaN	NaN	NaN	NaN	NaN	0	1	1
966	'>gi|11141889|ref|NP_068590.1| protein salvador homolog 1 [Homo sapiens]'	NaN	NaN	NaN	NaN	1	NaN	NaN	NaN	0	1	1
967	'>gi|112420968|ref|NP_001036249.1| coiled-coil domain-containing protein 158 [Homo sapiens]'	NaN	NaN	NaN	NaN	NaN	NaN	NaN	1	0	1	1
968	'>gi|115511026|ref|NP_443188.2| acyl-coenzyme A synthetase ACSM1, mitochondrial [Homo sapiens]'	NaN	NaN	1	NaN	NaN	NaN	NaN	NaN	0	1	1
969	'>gi|11641243|ref|NP_071736.1| peptide deformylase, mitochondrial precursor [Homo sapiens]'	NaN	NaN	NaN	NaN	NaN	1	NaN	NaN	0	1	1
970	'>gi|116734710|ref|NP_001080.2| ATP-binding cassette sub-family A member 3 [Homo sapiens]'	NaN	NaN	1	NaN	NaN	NaN	NaN	NaN	0	1	1
971	'>gi|118582269|ref|NP_001071634.1| serine/arginine-rich splicing factor 1 isoform 2 [Homo sapiens]'	NaN	NaN	NaN	NaN	NaN	1	NaN	NaN	0	1	1
972	'>gi|119220552|ref|NP_689957.3| protein sidekick-1 isoform 1 [Homo sapiens]'	NaN	NaN	NaN	NaN	1	NaN	NaN	NaN	0	1	1
973	'>gi|121583483|ref|NP_055855.2| 1-phosphatidylinositol 3-phosphate 5-kinase isoform 2 [Homo sapiens]'	1	NaN	NaN	NaN	NaN	NaN	NaN	NaN	0	1	1
974	'>gi|122937185|ref|NP_001073861.1| protein LCHN [Homo sapiens]'	NaN	NaN	NaN	NaN	1	NaN	NaN	NaN	0	1	1
975	'>gi|12408677|ref|NP_002614.2| prefoldin subunit 4 [Homo sapiens]'	NaN	NaN	NaN	NaN	NaN	NaN	1	NaN	0	1	1
976	'>gi|13124770|ref|NP_076869.1| vitamin K epoxide reductase complex subunit 1 isoform 1 precursor [Homo sapiens]'	NaN	NaN	NaN	NaN	NaN	NaN	1	NaN	0	1	1
977	'>gi|13259508|ref|NP_075408.1| dynactin subunit 1 isoform 2 [Homo sapiens]'	NaN	NaN	1	NaN	NaN	NaN	NaN	NaN	0	1	1
978	'>gi|132626688|ref|NP_055456.2| mediator of DNA damage checkpoint protein 1 [Homo sapiens]'	NaN	1	NaN	NaN	NaN	NaN	NaN	NaN	0	1	1
979	'>gi|13376259|ref|NP_079120.1| nuclear pore complex protein Nup85 [Homo sapiens]'	NaN	NaN	NaN	NaN	1	NaN	NaN	NaN	0	1	1
980	'>gi|13430848|ref|NP_068370.1| nuclear receptor subfamily 1 group D member 1 [Homo sapiens]'	NaN	NaN	NaN	NaN	NaN	1	NaN	NaN	0	1	1
981	'>gi|13435364|ref|NP_077740.1| desmocollin-2 isoform Dsc2a preproprotein [Homo sapiens]'	NaN	NaN	NaN	1	NaN	NaN	NaN	NaN	0	1	1
982	'>gi|14149738|ref|NP_065777.1| neurolysin, mitochondrial [Homo sapiens]'	NaN	NaN	NaN	NaN	1	NaN	NaN	NaN	0	1	1
983	'>gi|14150017|ref|NP_115649.1| transmembrane protein 126A isoform 1 [Homo sapiens]'	NaN	NaN	NaN	NaN	NaN	NaN	1	NaN	0	1	1
984	'>gi|14165466|ref|NP_114368.1| polypyrimidine tract-binding protein 1 isoform c [Homo sapiens]'	NaN	NaN	NaN	NaN	1	NaN	NaN	NaN	0	1	1
985	'>gi|145301567|ref|NP_061981.2| protein SMG9 [Homo sapiens]'	NaN	NaN	NaN	NaN	1	NaN	NaN	NaN	0	1	1
986	'>gi|145301607|ref|NP_001077422.1| thyroid adenoma-associated protein isoform a [Homo sapiens]'	NaN	NaN	1	NaN	NaN	NaN	NaN	NaN	0	1	1
987	'>gi|148536855|ref|NP_001091868.1| coatomer subunit alpha isoform 1 [Homo sapiens]'	NaN	NaN	1	NaN	NaN	NaN	NaN	NaN	0	1	1
988	'>gi|14861834|ref|NP_149061.1| cat eye syndrome critical region protein 5 isoform 2 precursor [Homo sapiens]'	NaN	NaN	NaN	NaN	1	NaN	NaN	NaN	0	1	1
989	'>gi|148727341|ref|NP_009109.3| serine-threonine kinase receptor-associated protein [Homo sapiens]'	NaN	NaN	NaN	NaN	1	NaN	NaN	NaN	0	1	1
990	'>gi|149274653|ref|NP_065831.1| patched domain-containing protein 2 [Homo sapiens]'	NaN	NaN	NaN	1	NaN	NaN	NaN	NaN	0	1	1
991	'>gi|150378539|ref|NP_149015.2| protein piccolo isoform 1 [Homo sapiens]'	NaN	NaN	NaN	NaN	NaN	1	NaN	NaN	0	1	1
992	'>gi|151108473|ref|NP_057152.2| mitochondrial fission 1 protein [Homo sapiens]'	NaN	NaN	NaN	NaN	NaN	NaN	1	NaN	0	1	1
993	'>gi|151301211|ref|NP_758438.2| transcription factor AP-2-delta [Homo sapiens]'	NaN	NaN	NaN	NaN	NaN	NaN	NaN	1	0	1	1
994	'>gi|15208665|ref|NP_150088.1| tripartite motif-containing protein 14 [Homo sapiens]'	NaN	NaN	NaN	NaN	1	NaN	NaN	NaN	0	1	1
995	'>gi|153251745|ref|NP_062457.3| mitochondrial fission regulator 1-like isoform a [Homo sapiens]'	NaN	NaN	NaN	NaN	NaN	1	NaN	NaN	0	1	1
996	'>gi|153252132|ref|NP_001093163.1| 60S ribosomal protein L31 isoform 3 [Homo sapiens]'	NaN	NaN	NaN	NaN	NaN	1	NaN	NaN	0	1	1
997	'>gi|154426292|ref|NP_000688.2| arachidonate 12-lipoxygenase, 12S-type [Homo sapiens]'	NaN	NaN	NaN	NaN	NaN	NaN	NaN	1	0	1	1
998	'>gi|154448892|ref|NP_055839.3| exportin-7 [Homo sapiens]'	NaN	NaN	NaN	1	NaN	NaN	NaN	NaN	0	1	1
999	'>gi|154689847|ref|NP_055619.2| uncharacterized protein KIAA0753 [Homo sapiens]'	NaN	NaN	NaN	NaN	NaN	NaN	NaN	1	0	1	1
1000	'>gi|154689866|ref|NP_001094060.1| uncharacterized protein KIAA0232 [Homo sapiens]'	NaN	NaN	1	NaN	NaN	NaN	NaN	NaN	0	1	1
1001	'>gi|156119605|ref|NP_036336.2| general transcription factor 3C polypeptide 4 [Homo sapiens]'	NaN	NaN	NaN	1	NaN	NaN	NaN	NaN	0	1	1
1002	'>gi|156119615|ref|NP_008832.2| unconventional myosin-IXa [Homo sapiens]'	NaN	1	NaN	NaN	NaN	NaN	NaN	NaN	0	1	1
1003	'>gi|156523268|ref|NP_689506.2| transcriptional adapter 2-beta [Homo sapiens]'	NaN	NaN	NaN	NaN	NaN	1	NaN	NaN	0	1	1
1004	'''>gi|157388997|ref|NP_001098395.1| protein-L-isoaspartate O-methyltransferase domain-containing protein 2 isoform 2 [Homo sapiens...'' <Preview truncated at 128 characters>'	NaN	NaN	NaN	NaN	NaN	1	NaN	NaN	0	1	1
1005	'>gi|157412255|ref|NP_055634.3| E3 ubiquitin-protein ligase Praja-2 [Homo sapiens]'	NaN	NaN	1	NaN	NaN	NaN	NaN	NaN	0	1	1
1006	'>gi|157738667|ref|NP_078789.2| FYVE and coiled-coil domain-containing protein 1 [Homo sapiens]'	NaN	1	NaN	NaN	NaN	NaN	NaN	NaN	0	1	1
1007	'>gi|15812188|ref|NP_208385.1| F-box only protein 3 isoform 2 [Homo sapiens]'	NaN	NaN	NaN	NaN	1	NaN	NaN	NaN	0	1	1
1008	'>gi|160948610|ref|NP_742067.3| E3 ubiquitin-protein ligase UBR3 [Homo sapiens]'	NaN	NaN	NaN	NaN	NaN	NaN	1	NaN	0	1	1
1009	'>gi|16418361|ref|NP_443091.1| protein RFT1 homolog [Homo sapiens]'	NaN	NaN	NaN	NaN	NaN	1	NaN	NaN	0	1	1
1010	'>gi|164419744|ref|NP_619727.2| nuclear factor of activated T-cells 5 isoform b [Homo sapiens]'	NaN	NaN	1	NaN	NaN	NaN	NaN	NaN	0	1	1
1011	'>gi|16445357|ref|NP_439896.1| MFS-type transporter SLC18B1 [Homo sapiens]'	NaN	NaN	NaN	NaN	NaN	1	NaN	NaN	0	1	1
1012	'>gi|16445419|ref|NP_005689.2| secretory carrier-associated membrane protein 3 isoform 1 [Homo sapiens]'	NaN	NaN	NaN	NaN	NaN	1	NaN	NaN	0	1	1
1013	'>gi|164607128|ref|NP_079157.3| solute carrier family 35 member E1 [Homo sapiens]'	NaN	NaN	NaN	NaN	NaN	1	NaN	NaN	0	1	1
1014	'>gi|16554604|ref|NP_057154.2| 28S ribosomal protein S23, mitochondrial [Homo sapiens]'	NaN	NaN	NaN	NaN	NaN	1	NaN	NaN	0	1	1
1015	'>gi|166197683|ref|NP_036400.2| phospholipase D3 [Homo sapiens]'	NaN	NaN	NaN	NaN	1	NaN	NaN	NaN	0	1	1
1016	'>gi|167412124|ref|NP_001107854.1| tuberin isoform 5 [Homo sapiens]'	1	NaN	NaN	NaN	NaN	NaN	NaN	NaN	0	1	1
1017	'>gi|16933537|ref|NP_444504.1| glomulin [Homo sapiens]'	NaN	NaN	NaN	NaN	1	NaN	NaN	NaN	0	1	1
1018	'>gi|171184451|ref|NP_055625.4| centrosome-associated protein 350 [Homo sapiens]'	1	NaN	NaN	NaN	NaN	NaN	NaN	NaN	0	1	1
1019	'>gi|18087855|ref|NP_542408.1| dynein light chain 2, cytoplasmic [Homo sapiens]'	NaN	NaN	NaN	NaN	NaN	NaN	1	NaN	0	1	1
1020	'>gi|191252814|ref|NP_001122107.1| RIMS-binding protein 3B [Homo sapiens]'	NaN	NaN	NaN	NaN	1	NaN	NaN	NaN	0	1	1
1021	'>gi|193083122|ref|NP_001122389.1| mitochondrial import receptor subunit TOM40 homolog [Homo sapiens]'	NaN	NaN	NaN	NaN	NaN	NaN	1	NaN	0	1	1
1022	'>gi|193804923|ref|NP_060485.4| uncharacterized protein CXorf57 isoform 1 [Homo sapiens]'	NaN	NaN	NaN	1	NaN	NaN	NaN	NaN	0	1	1
1023	'>gi|194473657|ref|NP_067056.2| deoxyribonuclease-2-beta isoform 1 precursor [Homo sapiens]'	NaN	NaN	NaN	NaN	1	NaN	NaN	NaN	0	1	1
1024	'>gi|19557636|ref|NP_570981.1| peptidyl-prolyl cis-trans isomerase-like 3 isoform PPIL3b [Homo sapiens]'	NaN	NaN	NaN	NaN	NaN	NaN	1	NaN	0	1	1
1025	'>gi|197304777|ref|NP_001127853.1| TBC1 domain family member 5 isoform a [Homo sapiens]'	NaN	NaN	NaN	1	NaN	NaN	NaN	NaN	0	1	1
1026	'>gi|198041777|ref|NP_001128251.1| importin-11 isoform 1 [Homo sapiens]'	NaN	NaN	NaN	1	NaN	NaN	NaN	NaN	0	1	1
1027	'>gi|19923231|ref|NP_002860.2| ras-related protein Rab-6A isoform a [Homo sapiens]'	NaN	NaN	NaN	NaN	NaN	1	NaN	NaN	0	1	1
1028	'>gi|19923599|ref|NP_079010.2| calmin [Homo sapiens]'	NaN	NaN	1	NaN	NaN	NaN	NaN	NaN	0	1	1
1029	'>gi|205277463|ref|NP_001128527.1| transketolase isoform 1 [Homo sapiens]'	NaN	NaN	NaN	1	NaN	NaN	NaN	NaN	0	1	1
1030	'>gi|208973244|ref|NP_001129174.1| 14-3-3 protein zeta/delta [Homo sapiens]'	NaN	NaN	NaN	NaN	1	NaN	NaN	NaN	0	1	1
1031	'>gi|209869993|ref|NP_001129477.1| trifunctional purine biosynthetic protein adenosine-3 isoform 1 [Homo sapiens]'	NaN	NaN	NaN	1	NaN	NaN	NaN	NaN	0	1	1
1032	'>gi|209969686|ref|NP_001129671.1| GRAM domain-containing protein 1A isoform 2 [Homo sapiens]'	NaN	NaN	NaN	1	NaN	NaN	NaN	NaN	0	1	1
1033	'>gi|209977080|ref|NP_001129695.1| REST corepressor 3 isoform a [Homo sapiens]'	NaN	NaN	NaN	1	NaN	NaN	NaN	NaN	0	1	1
1034	'>gi|21237768|ref|NP_620777.1| MAP kinase-activated protein kinase 5 isoform 2 [Homo sapiens]'	NaN	NaN	NaN	NaN	1	NaN	NaN	NaN	0	1	1
1035	'>gi|21264345|ref|NP_006253.2| peripherin [Homo sapiens]'	NaN	NaN	NaN	NaN	1	NaN	NaN	NaN	0	1	1
1036	'>gi|21359965|ref|NP_110409.2| cleft lip and palate transmembrane protein 1-like protein [Homo sapiens]'	NaN	NaN	NaN	NaN	1	NaN	NaN	NaN	0	1	1
1037	'>gi|21361144|ref|NP_002795.2| 26S protease regulatory subunit 6A [Homo sapiens]'	NaN	NaN	NaN	NaN	1	NaN	NaN	NaN	0	1	1
1038	'>gi|21493022|ref|NP_005091.2| A-kinase anchor protein 12 isoform 1 [Homo sapiens]'	NaN	1	NaN	NaN	NaN	NaN	NaN	NaN	0	1	1
1039	'>gi|215982798|ref|NP_001135970.1| NAD-dependent protein deacetylase sirtuin-1 isoform b [Homo sapiens]'	NaN	NaN	1	NaN	NaN	NaN	NaN	NaN	0	1	1
1040	'>gi|21687102|ref|NP_660304.1| mitochondrial import inner membrane translocase subunit TIM14 isoform 1 [Homo sapiens]'	NaN	NaN	NaN	NaN	NaN	NaN	1	NaN	0	1	1
1041	'>gi|21735575|ref|NP_065698.1| junctophilin-1 [Homo sapiens]'	NaN	NaN	NaN	1	NaN	NaN	NaN	NaN	0	1	1
1042	'>gi|22202633|ref|NP_002615.2| prefoldin subunit 5 isoform alpha [Homo sapiens]'	NaN	NaN	NaN	NaN	NaN	NaN	1	NaN	0	1	1
1043	'>gi|223671915|ref|NP_060859.4| GDP-fucose transporter 1 isoform a [Homo sapiens]'	NaN	NaN	NaN	1	NaN	NaN	NaN	NaN	0	1	1
1044	'>gi|224589127|ref|NP_060596.2| transmembrane protein 33 [Homo sapiens]'	NaN	NaN	NaN	NaN	NaN	NaN	1	NaN	0	1	1
1045	'>gi|224809327|ref|NP_001139247.1| peptidyl-prolyl cis-trans isomerase FKBP5 isoform 1 [Homo sapiens]'	NaN	NaN	NaN	NaN	1	NaN	NaN	NaN	0	1	1
1046	'>gi|22538465|ref|NP_002786.2| proteasome subunit beta type-3 [Homo sapiens]'	NaN	NaN	NaN	NaN	NaN	1	NaN	NaN	0	1	1
1047	'>gi|22538467|ref|NP_002787.2| proteasome subunit beta type-4 [Homo sapiens]'	NaN	NaN	NaN	NaN	NaN	1	NaN	NaN	0	1	1
1048	'>gi|226371754|ref|NP_112593.2| katanin p60 ATPase-containing subunit A-like 2 [Homo sapiens]'	NaN	NaN	NaN	1	NaN	NaN	NaN	NaN	0	1	1
1049	'>gi|22748877|ref|NP_689627.1| class E basic helix-loop-helix protein 22 [Homo sapiens]'	NaN	NaN	NaN	NaN	NaN	1	NaN	NaN	0	1	1
1050	'>gi|229577185|ref|NP_001153441.1| epidermal growth factor receptor substrate 15 isoform B [Homo sapiens]'	NaN	NaN	1	NaN	NaN	NaN	NaN	NaN	0	1	1
1051	'>gi|23308511|ref|NP_694563.1| zinc finger protein 3 homolog [Homo sapiens]'	NaN	1	NaN	NaN	NaN	NaN	NaN	NaN	0	1	1
1052	'>gi|238776833|ref|NP_005773.3| THO complex subunit 4 [Homo sapiens]'	NaN	NaN	NaN	NaN	NaN	1	NaN	NaN	0	1	1
1053	'>gi|24041035|ref|NP_077719.2| neurogenic locus notch homolog protein 2 isoform 1 preproprotein [Homo sapiens]'	NaN	NaN	1	NaN	NaN	NaN	NaN	NaN	0	1	1
1054	'>gi|24430137|ref|NP_006005.2| EKC/KEOPS complex subunit LAGE3 [Homo sapiens]'	NaN	NaN	NaN	NaN	NaN	NaN	1	NaN	0	1	1
1055	'>gi|24431935|ref|NP_065393.1| reticulon-4 isoform A [Homo sapiens]'	NaN	NaN	NaN	NaN	1	NaN	NaN	NaN	0	1	1
1056	'>gi|25121993|ref|NP_733839.1| RNA-binding protein Musashi homolog 2 isoform b [Homo sapiens]'	NaN	NaN	NaN	NaN	NaN	1	NaN	NaN	0	1	1
1057	'>gi|251831112|ref|YP_003024031.1| ATP synthase F0 subunit 6 (mitochondrion) [Homo sapiens]'	NaN	NaN	NaN	NaN	NaN	NaN	1	NaN	0	1	1
1058	'>gi|253970504|ref|NP_001156758.1| RNA-binding protein EWS isoform 4 [Homo sapiens]'	NaN	NaN	NaN	1	NaN	NaN	NaN	NaN	0	1	1
1059	'>gi|256017153|ref|NP_001157743.1| rho GTPase-activating protein 7 isoform 4 [Homo sapiens]'	NaN	NaN	NaN	NaN	NaN	NaN	1	NaN	0	1	1
1060	'>gi|256222415|ref|NP_001157791.1| filamin-B isoform 4 [Homo sapiens]'	NaN	1	NaN	NaN	NaN	NaN	NaN	NaN	0	1	1
1061	'>gi|256223453|ref|NP_009135.4| probable ATP-dependent RNA helicase DDX20 [Homo sapiens]'	NaN	NaN	NaN	1	NaN	NaN	NaN	NaN	0	1	1
1062	'>gi|256985183|ref|NP_066918.2| sodium-dependent multivitamin transporter [Homo sapiens]'	NaN	NaN	NaN	1	NaN	NaN	NaN	NaN	0	1	1
1063	'>gi|257900451|ref|NP_071351.2| piezo-type mechanosensitive ion channel component 2 [Homo sapiens]'	NaN	NaN	NaN	NaN	NaN	1	NaN	NaN	0	1	1
1064	'>gi|260064077|ref|NP_001159399.1| Meckel syndrome type 1 protein isoform 2 [Homo sapiens]'	NaN	NaN	NaN	NaN	1	NaN	NaN	NaN	0	1	1
1065	'>gi|261824035|ref|NP_060285.2| HAUS augmin-like complex subunit 4 isoform 1 [Homo sapiens]'	NaN	NaN	NaN	NaN	NaN	1	NaN	NaN	0	1	1
1066	'>gi|27363461|ref|NP_057153.8| mitochondrial import inner membrane translocase subunit TIM16 [Homo sapiens]'	NaN	NaN	NaN	NaN	NaN	NaN	1	NaN	0	1	1
1067	'>gi|27477111|ref|NP_006416.3| pre-mRNA-splicing factor SLU7 [Homo sapiens]'	NaN	NaN	NaN	1	NaN	NaN	NaN	NaN	0	1	1
1068	'>gi|27545323|ref|NP_078812.2| chondroitin sulfate synthase 2 isoform 1 [Homo sapiens]'	NaN	NaN	NaN	1	NaN	NaN	NaN	NaN	0	1	1
1069	'>gi|281182404|ref|NP_060830.2| gamma-taxilin isoform 1 [Homo sapiens]'	NaN	1	NaN	NaN	NaN	NaN	NaN	NaN	0	1	1
1070	'>gi|283436224|ref|NP_001164007.1| ATPase family AAA domain-containing protein 3A isoform 3 [Homo sapiens]'	1	NaN	NaN	NaN	NaN	NaN	NaN	NaN	0	1	1
1071	'>gi|283806705|ref|NP_001164608.1| spermatid perinuclear RNA-binding protein isoform 2 [Homo sapiens]'	NaN	NaN	NaN	NaN	NaN	1	NaN	NaN	0	1	1
1072	'>gi|283837920|ref|NP_001164641.1| mitochondrial 2-oxodicarboxylate carrier isoform 2 [Homo sapiens]'	NaN	NaN	NaN	NaN	NaN	1	NaN	NaN	0	1	1
1073	'>gi|28933465|ref|NP_803173.1| syntaxin-12 [Homo sapiens]'	NaN	NaN	NaN	NaN	NaN	1	NaN	NaN	0	1	1
1074	'>gi|291219929|ref|NP_001167460.1| rab-like protein 6 isoform 4 [Homo sapiens]'	NaN	1	NaN	NaN	NaN	NaN	NaN	NaN	0	1	1
1075	'>gi|296010852|ref|NP_001171548.1| asparagine synthetase [glutamine-hydrolyzing] isoform c [Homo sapiens]'	NaN	NaN	NaN	NaN	1	NaN	NaN	NaN	0	1	1
1076	'>gi|300388183|ref|NP_001177966.1| 26S proteasome non-ATPase regulatory subunit 1 isoform 2 [Homo sapiens]'	NaN	NaN	NaN	1	NaN	NaN	NaN	NaN	0	1	1
1077	'>gi|301129187|ref|NP_001180304.1| NADH dehydrogenase [ubiquinone] 1 alpha subcomplex subunit 11 isoform 2 [Homo sapiens]'	NaN	NaN	NaN	NaN	NaN	NaN	1	NaN	0	1	1
1078	'>gi|301897469|ref|NP_001967.3| beta-enolase isoform 1 [Homo sapiens]'	1	NaN	NaN	NaN	NaN	NaN	NaN	NaN	0	1	1
1079	'>gi|304766239|ref|NP_776195.2| protein YIPF6 isoform A [Homo sapiens]'	NaN	NaN	NaN	NaN	NaN	NaN	1	NaN	0	1	1
1080	'>gi|30520350|ref|NP_848930.1| ADP-ribosylation factor-like protein 5B [Homo sapiens]'	NaN	NaN	NaN	NaN	NaN	NaN	1	NaN	0	1	1
1081	'>gi|31044432|ref|NP_851853.1| LEM domain-containing protein 2 isoform 1 [Homo sapiens]'	NaN	NaN	NaN	NaN	1	NaN	NaN	NaN	0	1	1
1082	'>gi|310772255|ref|NP_001185585.1| A-kinase anchor protein 2 isoform 3 [Homo sapiens]'	NaN	NaN	1	NaN	NaN	NaN	NaN	NaN	0	1	1
1083	'>gi|311893365|ref|NP_001185798.1| calpain-1 catalytic subunit [Homo sapiens]'	NaN	NaN	NaN	NaN	NaN	NaN	NaN	1	0	1	1
1084	'>gi|313569770|ref|NP_001186270.1| 60S ribosomal protein L17 isoform a [Homo sapiens]'	NaN	NaN	NaN	NaN	NaN	1	NaN	NaN	0	1	1
1085	'>gi|31377705|ref|NP_078824.2| centrosomal protein of 97 kDa [Homo sapiens]'	NaN	NaN	1	NaN	NaN	NaN	NaN	NaN	0	1	1
1086	'>gi|31377722|ref|NP_071404.2| p53 apoptosis effector related to PMP-22 [Homo sapiens]'	NaN	NaN	1	NaN	NaN	NaN	NaN	NaN	0	1	1
1087	'>gi|315360620|ref|NP_001186745.1| gamma-glutamylcyclotransferase isoform 3 [Homo sapiens]'	NaN	NaN	NaN	NaN	NaN	1	NaN	NaN	0	1	1
1088	'>gi|315360622|ref|NP_001186746.1| gamma-glutamylcyclotransferase isoform 4 [Homo sapiens]'	NaN	NaN	NaN	NaN	NaN	NaN	NaN	1	0	1	1
1089	'>gi|31543415|ref|NP_443082.2| growth arrest and DNA damage-inducible proteins-interacting protein 1 [Homo sapiens]'	NaN	NaN	NaN	NaN	NaN	1	NaN	NaN	0	1	1
1090	'>gi|31543630|ref|NP_005406.3| sodium-dependent phosphate transporter 1 [Homo sapiens]'	NaN	NaN	NaN	1	NaN	NaN	NaN	NaN	0	1	1
1091	'>gi|31712030|ref|NP_853553.1| ancient ubiquitous protein 1 [Homo sapiens]'	NaN	NaN	NaN	NaN	1	NaN	NaN	NaN	0	1	1
1092	'>gi|319004144|ref|NP_001188299.1| RING-box protein 2 isoform 4 [Homo sapiens]'	NaN	NaN	NaN	NaN	NaN	NaN	1	NaN	0	1	1
1093	'>gi|32130536|ref|NP_849199.2| CKLF-like MARVEL transmembrane domain-containing protein 8 [Homo sapiens]'	NaN	NaN	NaN	NaN	NaN	NaN	1	NaN	0	1	1
1094	'>gi|321400120|ref|NP_001189477.1| SYNJ2BP-COX16 protein isoform 2 [Homo sapiens]'	NaN	NaN	NaN	NaN	NaN	NaN	1	NaN	0	1	1
1095	'>gi|323668330|ref|NP_001191121.1| tumor protein p73 isoform m [Homo sapiens]'	NaN	NaN	NaN	NaN	1	NaN	NaN	NaN	0	1	1
1096	'>gi|32454741|ref|NP_001226.2| serpin H1 precursor [Homo sapiens]'	NaN	NaN	NaN	NaN	1	NaN	NaN	NaN	0	1	1
1097	'>gi|325121006|ref|NP_001191407.1| uncharacterized protein LOC100533496 [Homo sapiens]'	NaN	NaN	NaN	NaN	NaN	1	NaN	NaN	0	1	1
1098	'>gi|32967597|ref|NP_870986.1| pyruvate kinase PKLR isoform 2 [Homo sapiens]'	NaN	NaN	NaN	NaN	NaN	1	NaN	NaN	0	1	1
1099	'>gi|32967605|ref|NP_872589.1| bromodomain adjacent to zinc finger domain protein 1A isoform b [Homo sapiens]'	NaN	NaN	NaN	NaN	1	NaN	NaN	NaN	0	1	1
1100	'>gi|334688816|ref|NP_001229295.1| proton-coupled folate transporter isoform 2 [Homo sapiens]'	NaN	NaN	NaN	NaN	1	NaN	NaN	NaN	0	1	1
1101	'>gi|33620742|ref|NP_057347.2| fizzy-related protein homolog isoform 2 [Homo sapiens]'	NaN	NaN	NaN	NaN	NaN	NaN	1	NaN	0	1	1
1102	'>gi|33636738|ref|NP_891993.1| cAMP-dependent protein kinase catalytic subunit beta isoform 1 [Homo sapiens]'	NaN	NaN	NaN	NaN	NaN	1	NaN	NaN	0	1	1
1103	'>gi|338968894|ref|NP_001229808.1| elongator complex protein 2 isoform 6 [Homo sapiens]'	NaN	NaN	NaN	1	NaN	NaN	NaN	NaN	0	1	1
1104	'>gi|339275831|ref|NP_001229852.1| eukaryotic translation initiation factor 3 subunit L isoform 2 [Homo sapiens]'	NaN	NaN	NaN	NaN	1	NaN	NaN	NaN	0	1	1
1105	'>gi|34101286|ref|NP_057191.2| zinc finger RNA-binding protein [Homo sapiens]'	NaN	NaN	1	NaN	NaN	NaN	NaN	NaN	0	1	1
1106	'>gi|341926289|ref|NP_001230089.1| TATA box-binding protein-associated factor RNA polymerase I subunit C isoform 6 [Homo sapiens]'	NaN	NaN	NaN	NaN	NaN	1	NaN	NaN	0	1	1
1107	'>gi|342187274|ref|NP_001230111.1| copper-transporting ATPase 2 isoform c [Homo sapiens]'	NaN	NaN	1	NaN	NaN	NaN	NaN	NaN	0	1	1
1108	'>gi|342837704|ref|NP_001230175.1| prolyl 3-hydroxylase 1 isoform 3 precursor [Homo sapiens]'	NaN	NaN	NaN	1	NaN	NaN	NaN	NaN	0	1	1
1109	'>gi|343887344|ref|NP_001230574.1| cofilin-2 isoform 2 [Homo sapiens]'	NaN	NaN	NaN	1	NaN	NaN	NaN	NaN	0	1	1
1110	'>gi|34485722|ref|NP_002258.2| importin subunit alpha-4 [Homo sapiens]'	NaN	NaN	NaN	NaN	1	NaN	NaN	NaN	0	1	1
1111	'>gi|34878735|ref|NP_149438.2| F-box only protein 44 isoform 1 [Homo sapiens]'	NaN	1	NaN	NaN	NaN	NaN	NaN	NaN	0	1	1
1112	'>gi|349732256|ref|NP_001231867.1| thioredoxin isoform 2 [Homo sapiens]'	NaN	NaN	NaN	1	NaN	NaN	NaN	NaN	0	1	1
1113	'''>gi|351542238|ref|NP_001234925.1| arf-GAP with SH3 domain, ANK repeat and PH domain-containing protein 1 isoform 2 [Homo sapiens...'' <Preview truncated at 128 characters>'	NaN	NaN	NaN	NaN	1	NaN	NaN	NaN	0	1	1
1114	'>gi|352962149|ref|NP_001238754.1| transcription factor Sp1 isoform c [Homo sapiens]'	NaN	NaN	NaN	1	NaN	NaN	NaN	NaN	0	1	1
1115	'>gi|357933617|ref|NP_001239546.1| lipocalin-1 isoform 1 precursor [Homo sapiens]'	NaN	1	NaN	NaN	NaN	NaN	NaN	NaN	0	1	1
1116	'>gi|372266129|ref|NP_001243194.1| protein flightless-1 homolog isoform 3 [Homo sapiens]'	NaN	NaN	1	NaN	NaN	NaN	NaN	NaN	0	1	1
1117	'>gi|372266175|ref|NP_001243208.1| zinc finger protein 26 isoform 1 precursor [Homo sapiens]'	NaN	NaN	1	NaN	NaN	NaN	NaN	NaN	0	1	1
1118	'>gi|38027914|ref|NP_937832.1| COP9 signalosome complex subunit 8 isoform 2 [Homo sapiens]'	NaN	NaN	NaN	NaN	NaN	NaN	1	NaN	0	1	1
1119	'>gi|38027923|ref|NP_006828.2| COP9 signalosome complex subunit 5 [Homo sapiens]'	NaN	NaN	NaN	NaN	NaN	1	NaN	NaN	0	1	1
1120	'>gi|38044290|ref|NP_060082.2| zinc finger CCHC domain-containing protein 8 [Homo sapiens]'	NaN	NaN	NaN	1	NaN	NaN	NaN	NaN	0	1	1
1121	'>gi|38455391|ref|NP_006388.2| ribonuclease H2 subunit A [Homo sapiens]'	NaN	NaN	NaN	NaN	NaN	1	NaN	NaN	0	1	1
1122	'>gi|38455402|ref|NP_005555.2| neutrophil gelatinase-associated lipocalin precursor [Homo sapiens]'	NaN	NaN	NaN	1	NaN	NaN	NaN	NaN	0	1	1
1123	'>gi|38488716|ref|NP_060249.2| DEP domain-containing protein 1A isoform b [Homo sapiens]'	NaN	NaN	NaN	NaN	NaN	NaN	1	NaN	0	1	1
1124	'>gi|39930397|ref|NP_065196.1| serine/threonine-protein phosphatase 4 regulatory subunit 3B isoform 2 [Homo sapiens]'	NaN	NaN	NaN	1	NaN	NaN	NaN	NaN	0	1	1
1125	'>gi|39995109|ref|NP_000396.2| ganglioside GM2 activator isoform 1 precursor [Homo sapiens]'	NaN	NaN	NaN	NaN	NaN	1	NaN	NaN	0	1	1
1126	'>gi|40217805|ref|NP_078930.3| polynucleotide 5''-hydroxyl-kinase NOL9 [Homo sapiens]'	NaN	NaN	NaN	1	NaN	NaN	NaN	NaN	0	1	1
1127	'>gi|40217825|ref|NP_115605.2| SLIT and NTRK-like protein 6 precursor [Homo sapiens]'	NaN	1	NaN	NaN	NaN	NaN	NaN	NaN	0	1	1
1128	'>gi|40217847|ref|NP_054733.2| U5 small nuclear ribonucleoprotein 200 kDa helicase [Homo sapiens]'	NaN	1	NaN	NaN	NaN	NaN	NaN	NaN	0	1	1
1129	'>gi|40254851|ref|NP_037487.2| serine/threonine-protein kinase N3 [Homo sapiens]'	NaN	NaN	NaN	1	NaN	NaN	NaN	NaN	0	1	1
1130	'>gi|40789249|ref|NP_060592.2| aspartate--tRNA ligase, mitochondrial [Homo sapiens]'	NaN	NaN	NaN	NaN	1	NaN	NaN	NaN	0	1	1
1131	'>gi|410991931|ref|NP_001258610.1| pyrroline-5-carboxylate reductase 2 isoform 2 [Homo sapiens]'	NaN	NaN	NaN	NaN	NaN	1	NaN	NaN	0	1	1
1132	'>gi|41352721|ref|NP_510968.2| proton-coupled amino acid transporter 1 [Homo sapiens]'	NaN	NaN	NaN	NaN	NaN	1	NaN	NaN	0	1	1
1133	'>gi|414144872|ref|NP_001258664.1| coatomer subunit zeta-1 isoform 3 [Homo sapiens]'	NaN	NaN	NaN	NaN	NaN	NaN	1	NaN	0	1	1
1134	'>gi|422398896|ref|NP_001258717.1| cytoplasmic dynein 1 intermediate chain 2 isoform 3 [Homo sapiens]'	NaN	NaN	NaN	1	NaN	NaN	NaN	NaN	0	1	1
1135	'>gi|42716302|ref|NP_976075.1| CD59 glycoprotein preproprotein [Homo sapiens]'	NaN	NaN	NaN	NaN	NaN	1	NaN	NaN	0	1	1
1136	'>gi|42741684|ref|NP_976225.1| zinc finger Ran-binding domain-containing protein 2 isoform 1 [Homo sapiens]'	1	NaN	NaN	NaN	NaN	NaN	NaN	NaN	0	1	1
1137	'>gi|429836877|ref|NP_001258847.1| signal peptidase complex catalytic subunit SEC11A isoform 5 [Homo sapiens]'	NaN	NaN	NaN	NaN	NaN	NaN	1	NaN	0	1	1
1138	'>gi|4502015|ref|NP_003479.1| A-kinase anchor protein 1, mitochondrial precursor [Homo sapiens]'	NaN	NaN	1	NaN	NaN	NaN	NaN	NaN	0	1	1
1139	'>gi|4502247|ref|NP_001661.1| armadillo repeat protein deleted in velo-cardio-facial syndrome [Homo sapiens]'	NaN	NaN	NaN	1	NaN	NaN	NaN	NaN	0	1	1
1140	'>gi|4503095|ref|NP_001886.1| casein kinase II subunit alpha isoform a [Homo sapiens]'	NaN	NaN	NaN	NaN	1	NaN	NaN	NaN	0	1	1
1141	'>gi|4503253|ref|NP_001335.1| dolichyl-diphosphooligosaccharide--protein glycosyltransferase subunit DAD1 [Homo sapiens]'	NaN	NaN	NaN	NaN	NaN	NaN	1	NaN	0	1	1
1142	'>gi|4503507|ref|NP_001406.1| eukaryotic translation initiation factor 2 subunit 3 [Homo sapiens]'	NaN	NaN	NaN	NaN	1	NaN	NaN	NaN	0	1	1
1143	'>gi|4503515|ref|NP_003747.1| eukaryotic translation initiation factor 3 subunit H [Homo sapiens]'	NaN	NaN	NaN	NaN	1	NaN	NaN	NaN	0	1	1
1144	'>gi|4503727|ref|NP_002004.1| peptidyl-prolyl cis-trans isomerase FKBP3 [Homo sapiens]'	1	NaN	NaN	NaN	NaN	NaN	NaN	NaN	0	1	1
1145	'>gi|4504349|ref|NP_000509.1| hemoglobin subunit beta [Homo sapiens]'	NaN	NaN	NaN	NaN	NaN	NaN	NaN	1	0	1	1
1146	'>gi|4505371|ref|NP_002487.1| NADH dehydrogenase [ubiquinone] iron-sulfur protein 8, mitochondrial precursor [Homo sapiens]'	NaN	NaN	NaN	NaN	NaN	NaN	1	NaN	0	1	1
1147	'>gi|4505813|ref|NP_003737.1| dynein light chain 1, cytoplasmic [Homo sapiens]'	NaN	NaN	NaN	NaN	NaN	1	NaN	NaN	0	1	1
1148	'>gi|4506017|ref|NP_002706.1| serine/threonine-protein phosphatase 2A catalytic subunit alpha isoform [Homo sapiens]'	NaN	NaN	NaN	NaN	1	NaN	NaN	NaN	0	1	1
1149	'>gi|4506163|ref|NP_000012.1| presenilin-1 isoform I-467 [Homo sapiens]'	NaN	NaN	NaN	NaN	NaN	NaN	1	NaN	0	1	1
1150	'>gi|4506179|ref|NP_002777.1| proteasome subunit alpha type-1 isoform 2 [Homo sapiens]'	NaN	NaN	NaN	NaN	NaN	1	NaN	NaN	0	1	1
1151	'>gi|4506181|ref|NP_002778.1| proteasome subunit alpha type-2 [Homo sapiens]'	NaN	NaN	NaN	NaN	NaN	1	NaN	NaN	0	1	1
1152	'>gi|4506193|ref|NP_002784.1| proteasome subunit beta type-1 [Homo sapiens]'	NaN	NaN	NaN	NaN	NaN	1	NaN	NaN	0	1	1
1153	'>gi|4506489|ref|NP_002906.1| replication factor C subunit 3 isoform 1 [Homo sapiens]'	NaN	NaN	NaN	NaN	NaN	1	NaN	NaN	0	1	1
1154	'>gi|4506567|ref|NP_003790.1| mRNA cap guanine-N7 methyltransferase [Homo sapiens]'	NaN	NaN	NaN	NaN	1	NaN	NaN	NaN	0	1	1
1155	'>gi|4506631|ref|NP_000980.1| 60S ribosomal protein L30 [Homo sapiens]'	NaN	NaN	NaN	NaN	NaN	NaN	1	NaN	0	1	1
1156	'>gi|4506643|ref|NP_000989.1| 60S ribosomal protein L37a [Homo sapiens]'	NaN	NaN	NaN	NaN	NaN	NaN	1	NaN	0	1	1
1157	'>gi|4506663|ref|NP_000964.1| 60S ribosomal protein L8 [Homo sapiens]'	NaN	NaN	NaN	NaN	NaN	1	NaN	NaN	0	1	1
1158	'>gi|4506669|ref|NP_000994.1| 60S acidic ribosomal protein P1 isoform 1 [Homo sapiens]'	NaN	NaN	NaN	NaN	NaN	NaN	1	NaN	0	1	1
1159	'>gi|4506715|ref|NP_001022.1| 40S ribosomal protein S28 [Homo sapiens]'	NaN	NaN	NaN	NaN	NaN	NaN	1	NaN	0	1	1
1160	'>gi|4507131|ref|NP_003086.1| small nuclear ribonucleoprotein F [Homo sapiens]'	NaN	NaN	NaN	NaN	NaN	NaN	1	NaN	0	1	1
1161	'>gi|4507149|ref|NP_000445.1| superoxide dismutase [Cu-Zn] [Homo sapiens]'	NaN	NaN	NaN	NaN	NaN	NaN	1	NaN	0	1	1
1162	'>gi|4507217|ref|NP_003124.1| signal recognition particle 9 kDa protein isoform 2 [Homo sapiens]'	NaN	NaN	NaN	NaN	NaN	NaN	1	NaN	0	1	1
1163	'>gi|4507513|ref|NP_000353.1| metalloproteinase inhibitor 3 precursor [Homo sapiens]'	NaN	NaN	NaN	NaN	NaN	1	NaN	NaN	0	1	1
1164	'>gi|4507577|ref|NP_001057.1| tumor necrosis factor receptor superfamily member 1B precursor [Homo sapiens]'	NaN	NaN	1	NaN	NaN	NaN	NaN	NaN	0	1	1
1165	'>gi|4507789|ref|NP_003338.1| ubiquitin-conjugating enzyme E2 L3 isoform 1 [Homo sapiens]'	NaN	NaN	NaN	NaN	1	NaN	NaN	NaN	0	1	1
1166	'>gi|454544715|ref|NP_001263626.1| cellular tumor antigen p53 isoform j [Homo sapiens]'	NaN	NaN	NaN	NaN	NaN	1	NaN	NaN	0	1	1
1167	'>gi|4557727|ref|NP_000228.1| lipoprotein lipase precursor [Homo sapiens]'	NaN	NaN	NaN	NaN	1	NaN	NaN	NaN	0	1	1
1168	'>gi|4557759|ref|NP_000241.1| myeloperoxidase precursor [Homo sapiens]'	NaN	NaN	NaN	1	NaN	NaN	NaN	NaN	0	1	1
1169	'>gi|4557871|ref|NP_001054.1| serotransferrin precursor [Homo sapiens]'	NaN	NaN	1	NaN	NaN	NaN	NaN	NaN	0	1	1
1170	'>gi|45935393|ref|NP_079215.2| epithelial splicing regulatory protein 2 [Homo sapiens]'	NaN	NaN	NaN	1	NaN	NaN	NaN	NaN	0	1	1
1171	'>gi|459642365|ref|NP_001264044.1| dynein heavy chain 11, axonemal [Homo sapiens]'	NaN	NaN	NaN	NaN	NaN	1	NaN	NaN	0	1	1
1172	'>gi|47174859|ref|NP_079334.3| tripartite motif-containing protein 46 isoform 1 [Homo sapiens]'	NaN	NaN	NaN	NaN	NaN	NaN	NaN	1	0	1	1
1173	'>gi|47578099|ref|NP_065184.2| selenoprotein N isoform 1 precursor [Homo sapiens]'	NaN	NaN	NaN	NaN	1	NaN	NaN	NaN	0	1	1
1174	'>gi|4758790|ref|NP_004543.1| NADH dehydrogenase [ubiquinone] iron-sulfur protein 5 [Homo sapiens]'	NaN	NaN	NaN	NaN	NaN	NaN	1	NaN	0	1	1
1175	'>gi|48255947|ref|NP_001001323.1| plasma membrane calcium-transporting ATPase 1 isoform 1a [Homo sapiens]'	NaN	NaN	NaN	1	NaN	NaN	NaN	NaN	0	1	1
1176	'>gi|4826898|ref|NP_005013.1| profilin-1 [Homo sapiens]'	NaN	NaN	NaN	1	NaN	NaN	NaN	NaN	0	1	1
1177	'>gi|485836756|ref|NP_001264890.1| stromal interaction molecule 1 isoform 1 precursor [Homo sapiens]'	NaN	NaN	NaN	1	NaN	NaN	NaN	NaN	0	1	1
1178	'>gi|4885111|ref|NP_005176.1| calmodulin-like protein 3 [Homo sapiens]'	NaN	1	NaN	NaN	NaN	NaN	NaN	NaN	0	1	1
1179	'>gi|4885349|ref|NP_005299.1| G protein-coupled receptor kinase 5 [Homo sapiens]'	NaN	NaN	NaN	NaN	NaN	NaN	NaN	1	0	1	1
1180	'>gi|4885381|ref|NP_005313.1| histone H1.5 [Homo sapiens]'	1	NaN	NaN	NaN	NaN	NaN	NaN	NaN	0	1	1
1181	'>gi|5031611|ref|NP_005859.1| BET1 homolog [Homo sapiens]'	NaN	NaN	NaN	NaN	NaN	NaN	1	NaN	0	1	1
1182	'>gi|5031635|ref|NP_005498.1| cofilin-1 [Homo sapiens]'	NaN	NaN	NaN	NaN	NaN	1	NaN	NaN	0	1	1
1183	'>gi|503774357|ref|NP_001265139.1| nuclear pore complex protein Nup153 isoform 3 [Homo sapiens]'	NaN	NaN	1	NaN	NaN	NaN	NaN	NaN	0	1	1
1184	'>gi|51093861|ref|NP_055365.2| caspase recruitment domain-containing protein 10 [Homo sapiens]'	NaN	NaN	NaN	NaN	NaN	1	NaN	NaN	0	1	1
1185	'>gi|51242955|ref|NP_001003787.1| STE20-related kinase adapter protein alpha isoform 1 [Homo sapiens]'	NaN	NaN	NaN	NaN	1	NaN	NaN	NaN	0	1	1
1186	'>gi|51479129|ref|NP_001003713.1| ATP synthase subunit f, mitochondrial isoform 2b [Homo sapiens]'	NaN	NaN	NaN	NaN	NaN	NaN	1	NaN	0	1	1
1187	'>gi|522020125|ref|NP_001265586.1| polymerase delta-interacting protein 3 isoform 3 [Homo sapiens]'	NaN	NaN	NaN	NaN	1	NaN	NaN	NaN	0	1	1
1188	'>gi|525342616|ref|NP_001266289.1| acyl-protein thioesterase 1 isoform 6 [Homo sapiens]'	NaN	NaN	NaN	NaN	NaN	NaN	1	NaN	0	1	1
1189	'>gi|526118165|ref|NP_001267720.1| surfeit locus protein 4 isoform 4 [Homo sapiens]'	NaN	NaN	NaN	NaN	NaN	1	NaN	NaN	0	1	1
1190	'>gi|530366031|ref|XP_005273106.1| PREDICTED: lysophospholipase-like protein 1 isoform X4 [Homo sapiens]'	NaN	NaN	NaN	NaN	NaN	NaN	1	NaN	0	1	1
1191	'>gi|530382330|ref|XP_005249324.1| PREDICTED: elongation of very long chain fatty acids protein 5 isoform X2 [Homo sapiens]'	NaN	NaN	NaN	NaN	NaN	1	NaN	NaN	0	1	1
1192	'>gi|530387614|ref|XP_005273481.1| PREDICTED: potassium channel subfamily U member 1 isoform X2 [Homo sapiens]'	NaN	1	NaN	NaN	NaN	NaN	NaN	NaN	0	1	1
1193	'>gi|530388934|ref|XP_005250932.1| PREDICTED: E3 SUMO-protein ligase NSE2 isoform X1 [Homo sapiens]'	NaN	NaN	1	NaN	NaN	NaN	NaN	NaN	0	1	1
1194	'>gi|530412751|ref|XP_005257675.1| PREDICTED: signal transducer and activator of transcription 3 isoform X6 [Homo sapiens]'	NaN	NaN	NaN	1	NaN	NaN	NaN	NaN	0	1	1
1195	'>gi|530416098|ref|XP_005258758.1| PREDICTED: hsp70-binding protein 1 isoform X2 [Homo sapiens]'	NaN	NaN	NaN	NaN	NaN	1	NaN	NaN	0	1	1
1196	'>gi|530420021|ref|XP_005261631.1| PREDICTED: small G protein signaling modulator 3 isoform X3 [Homo sapiens]'	NaN	NaN	NaN	1	NaN	NaN	NaN	NaN	0	1	1
1197	'>gi|530422231|ref|XP_005262277.1| PREDICTED: insulin receptor substrate 4 isoform X1 [Homo sapiens]'	NaN	NaN	NaN	NaN	1	NaN	NaN	NaN	0	1	1
1198	'>gi|530426857|ref|XP_005266193.1| PREDICTED: protein transport protein Sec16A isoform X5 [Homo sapiens]'	NaN	1	NaN	NaN	NaN	NaN	NaN	NaN	0	1	1
1199	'>gi|530431101|ref|XP_005277007.1| PREDICTED: protein LSM14 homolog A isoform X3 [Homo sapiens]'	NaN	NaN	NaN	NaN	NaN	1	NaN	NaN	0	1	1
1200	'>gi|531990794|ref|NP_001269086.1| putative tRNA (cytidine(32)/guanosine(34)-2''-O)-methyltransferase isoform c [Homo sapiens]'	NaN	NaN	NaN	NaN	NaN	1	NaN	NaN	0	1	1
1201	'>gi|532524941|ref|NP_001269118.1| UBX domain-containing protein 8 isoform 2 precursor [Homo sapiens]'	NaN	NaN	NaN	NaN	NaN	1	NaN	NaN	0	1	1
1202	'>gi|543583697|ref|NP_001269533.1| prostaglandin E synthase 3 isoform e [Homo sapiens]'	NaN	NaN	NaN	NaN	NaN	NaN	1	NaN	0	1	1
1203	'>gi|544346309|ref|NP_001269656.1| peroxisomal membrane protein PMP34 isoform 3 [Homo sapiens]'	NaN	NaN	NaN	NaN	NaN	1	NaN	NaN	0	1	1
1204	'>gi|5453634|ref|NP_006132.1| cytoplasmic dynein 1 light intermediate chain 2 isoform 1 [Homo sapiens]'	NaN	NaN	NaN	NaN	1	NaN	NaN	NaN	0	1	1
1205	'>gi|5453958|ref|NP_006238.1| serine/threonine-protein phosphatase 5 isoform 1 [Homo sapiens]'	NaN	NaN	NaN	NaN	1	NaN	NaN	NaN	0	1	1
1206	'>gi|5454168|ref|NP_006453.1| ranBP-type and C3HC4-type zinc finger-containing protein 1 isoform 1 [Homo sapiens]'	NaN	NaN	NaN	NaN	1	NaN	NaN	NaN	0	1	1
1207	'>gi|545688925|ref|NP_001269911.1| transducin-like enhancer protein 3 isoform g [Homo sapiens]'	NaN	NaN	NaN	1	NaN	NaN	NaN	NaN	0	1	1
1208	'>gi|546231677|ref|NP_001271188.1| kinesin-like protein KIF20B isoform 1 [Homo sapiens]'	NaN	NaN	NaN	NaN	NaN	NaN	NaN	1	0	1	1
1209	'>gi|54792136|ref|NP_055897.1| follistatin-related protein 4 precursor [Homo sapiens]'	NaN	NaN	NaN	1	NaN	NaN	NaN	NaN	0	1	1
1210	'>gi|54859722|ref|NP_056046.1| nuclear pore complex protein Nup160 [Homo sapiens]'	NaN	NaN	1	NaN	NaN	NaN	NaN	NaN	0	1	1
1211	'>gi|554506556|ref|NP_001272972.1| medium-chain specific acyl-CoA dehydrogenase, mitochondrial isoform d precursor [Homo sapiens]'	NaN	NaN	NaN	NaN	1	NaN	NaN	NaN	0	1	1
1212	'>gi|556503440|ref|NP_001273295.1| MAP7 domain-containing protein 1 isoform 3 [Homo sapiens]'	NaN	NaN	1	NaN	NaN	NaN	NaN	NaN	0	1	1
1213	'>gi|557440899|ref|NP_001273490.1| nuclear mitotic apparatus protein 1 isoform 2 [Homo sapiens]'	NaN	NaN	NaN	NaN	1	NaN	NaN	NaN	0	1	1
1214	'>gi|55749531|ref|NP_006833.2| splicing factor 3B subunit 2 [Homo sapiens]'	NaN	NaN	1	NaN	NaN	NaN	NaN	NaN	0	1	1
1215	'>gi|55749678|ref|NP_079452.3| ninein-like protein [Homo sapiens]'	NaN	NaN	NaN	NaN	NaN	NaN	NaN	1	0	1	1
1216	'>gi|557786188|ref|NP_001273587.1| TBC1 domain family member 4 isoform 2 [Homo sapiens]'	NaN	NaN	1	NaN	NaN	NaN	NaN	NaN	0	1	1
1217	'>gi|56243533|ref|NP_071327.2| stromal cell-derived factor 2-like protein 1 precursor [Homo sapiens]'	NaN	NaN	NaN	NaN	NaN	1	NaN	NaN	0	1	1
1218	'>gi|565324223|ref|NP_001274268.1| calcium-binding protein 39-like [Homo sapiens]'	NaN	NaN	NaN	NaN	NaN	1	NaN	NaN	0	1	1
1219	'>gi|568815719|ref|NP_001275582.1| clathrin heavy chain 1 isoform 2 [Homo sapiens]'	NaN	NaN	1	NaN	NaN	NaN	NaN	NaN	0	1	1
1220	'>gi|570359601|ref|NP_001275668.1| dynamin-1 isoform 4 [Homo sapiens]'	NaN	NaN	NaN	1	NaN	NaN	NaN	NaN	0	1	1
1221	'>gi|574957204|ref|NP_001276334.1| MMS19 nucleotide excision repair protein homolog isoform 1 [Homo sapiens]'	NaN	NaN	NaN	1	NaN	NaN	NaN	NaN	0	1	1
1222	'>gi|57634534|ref|NP_055950.1| nuclear pore complex protein Nup205 [Homo sapiens]'	NaN	NaN	1	NaN	NaN	NaN	NaN	NaN	0	1	1
1223	'>gi|57634536|ref|NP_055970.1| la-related protein 4B [Homo sapiens]'	NaN	NaN	NaN	1	NaN	NaN	NaN	NaN	0	1	1
1224	'>gi|57863259|ref|NP_001008897.1| T-complex protein 1 subunit alpha isoform b [Homo sapiens]'	NaN	NaN	NaN	NaN	1	NaN	NaN	NaN	0	1	1
1225	'>gi|57863298|ref|NP_055811.1| 1-phosphatidylinositol 4,5-bisphosphate phosphodiesterase eta-1 isoform b [Homo sapiens]'	NaN	NaN	1	NaN	NaN	NaN	NaN	NaN	0	1	1
1226	'>gi|578798274|ref|XP_006710371.1| PREDICTED: dnaJ homolog subfamily B member 4 isoform X2 [Homo sapiens]'	NaN	NaN	NaN	NaN	NaN	1	NaN	NaN	0	1	1
1227	'>gi|578800215|ref|XP_006711147.1| PREDICTED: heterogeneous nuclear ribonucleoprotein C-like 1-like [Homo sapiens]'	NaN	NaN	NaN	NaN	1	NaN	NaN	NaN	0	1	1
1228	'>gi|578804333|ref|XP_006712589.1| PREDICTED: low-density lipoprotein receptor-related protein 2 isoform X1 [Homo sapiens]'	NaN	NaN	1	NaN	NaN	NaN	NaN	NaN	0	1	1
1229	'>gi|578806127|ref|XP_006713228.1| PREDICTED: small integral membrane protein 4 isoform X1, partial [Homo sapiens]'	NaN	NaN	NaN	NaN	NaN	NaN	1	NaN	0	1	1
1230	'>gi|578814771|ref|XP_006716244.1| PREDICTED: mitochondrial-processing peptidase subunit beta isoform X4 [Homo sapiens]'	NaN	1	NaN	NaN	NaN	NaN	NaN	NaN	0	1	1
1231	'>gi|578826542|ref|XP_006720432.1| PREDICTED: secretory carrier-associated membrane protein 2 isoform X1 [Homo sapiens]'	NaN	NaN	NaN	NaN	NaN	1	NaN	NaN	0	1	1
1232	'>gi|578829936|ref|XP_006721602.1| PREDICTED: derlin-2 isoform X2 [Homo sapiens]'	NaN	NaN	NaN	NaN	NaN	1	NaN	NaN	0	1	1
1233	'>gi|578836330|ref|XP_006723981.1| PREDICTED: histone H2B type F-S-like [Homo sapiens]'	NaN	NaN	NaN	1	NaN	NaN	NaN	NaN	0	1	1
1234	'>gi|578837067|ref|XP_006724253.1| PREDICTED: RNA binding protein fox-1 homolog 2 isoform X16 [Homo sapiens]'	NaN	NaN	NaN	1	NaN	NaN	NaN	NaN	0	1	1
1235	'''>gi|578839125|ref|XP_006724962.1| PREDICTED: putative V-set and immunoglobulin domain-containing-like protein IGHV4OR15-8-like [...'' <Preview truncated at 128 characters>'	NaN	NaN	NaN	1	NaN	NaN	NaN	NaN	0	1	1
1236	'>gi|578842191|ref|XP_006726110.1| PREDICTED: HLA class I histocompatibility antigen, A-26 alpha chain isoform X2 [Homo sapiens]'	NaN	NaN	NaN	1	NaN	NaN	NaN	NaN	0	1	1
1237	'>gi|5802968|ref|NP_006809.1| protein AF1q [Homo sapiens]'	NaN	NaN	NaN	NaN	NaN	NaN	1	NaN	0	1	1
1238	'>gi|5803040|ref|NP_006849.1| transmembrane emp24 domain-containing protein 1 precursor [Homo sapiens]'	NaN	NaN	NaN	NaN	NaN	1	NaN	NaN	0	1	1
1239	'>gi|5803165|ref|NP_006799.1| protein transport protein Sec61 subunit beta [Homo sapiens]'	NaN	NaN	NaN	NaN	NaN	NaN	1	NaN	0	1	1
1240	'>gi|58331144|ref|NP_787118.2| proline-rich protein 18 [Homo sapiens]'	NaN	NaN	NaN	NaN	NaN	NaN	1	NaN	0	1	1
1241	'>gi|58331268|ref|NP_060139.2| DNA excision repair protein ERCC-6-like [Homo sapiens]'	NaN	NaN	1	NaN	NaN	NaN	NaN	NaN	0	1	1
1242	'>gi|588480511|ref|NP_001277059.1| protein O-linked-mannose beta-1,2-N-acetylglucosaminyltransferase 1 isoform 4 [Homo sapiens]'	NaN	NaN	NaN	NaN	1	NaN	NaN	NaN	0	1	1
1243	'>gi|589269125|ref|NP_001277141.1| tetraspanin-10 isoform a [Homo sapiens]'	NaN	NaN	NaN	1	NaN	NaN	NaN	NaN	0	1	1
1244	'>gi|5902054|ref|NP_008844.1| E3 ubiquitin-protein ligase RNF5 [Homo sapiens]'	NaN	NaN	NaN	NaN	NaN	NaN	1	NaN	0	1	1
1245	'>gi|5902064|ref|NP_008918.1| rab effector Noc2 isoform 1 [Homo sapiens]'	NaN	NaN	1	NaN	NaN	NaN	NaN	NaN	0	1	1
1246	'>gi|597709787|ref|NP_001278017.1| WD repeat-containing protein 87 isoform 1 [Homo sapiens]'	NaN	NaN	NaN	NaN	1	NaN	NaN	NaN	0	1	1
1247	'>gi|614458181|ref|NP_001092007.2| patatin-like phospholipase domain-containing protein 7 isoform a [Homo sapiens]'	NaN	NaN	NaN	NaN	1	NaN	NaN	NaN	0	1	1
1248	'>gi|614458217|ref|NP_997244.4| FRAS1-related extracellular matrix protein 2 precursor [Homo sapiens]'	NaN	1	NaN	NaN	NaN	NaN	NaN	NaN	0	1	1
1249	'>gi|61743916|ref|NP_057436.2| carboxypeptidase A4 preproprotein [Homo sapiens]'	NaN	NaN	NaN	NaN	NaN	1	NaN	NaN	0	1	1
1250	'>gi|618468299|ref|NP_001278532.1| dynein light chain Tctex-type 1 isoform 3 [Homo sapiens]'	NaN	NaN	NaN	NaN	NaN	NaN	1	NaN	0	1	1
1251	'>gi|62530384|ref|NP_001910.2| enoyl-CoA delta isomerase 1, mitochondrial isoform 1 precursor [Homo sapiens]'	NaN	NaN	NaN	NaN	NaN	1	NaN	NaN	0	1	1
1252	'>gi|62955829|ref|NP_219500.1| transmembrane protein 261 [Homo sapiens]'	NaN	NaN	NaN	NaN	NaN	NaN	1	NaN	0	1	1
1253	'>gi|63252886|ref|NP_000908.2| prolyl 4-hydroxylase subunit alpha-1 isoform 1 precursor [Homo sapiens]'	NaN	NaN	NaN	NaN	1	NaN	NaN	NaN	0	1	1
1254	'>gi|632794837|ref|NP_001278845.1| small nuclear ribonucleoprotein Sm D1 isoform 2 [Homo sapiens]'	NaN	NaN	NaN	NaN	NaN	NaN	1	NaN	0	1	1
1255	'>gi|661902998|ref|NP_001284347.1| heterogeneous nuclear ribonucleoprotein M isoform c [Homo sapiens]'	NaN	NaN	NaN	NaN	NaN	1	NaN	NaN	0	1	1
1256	'>gi|664806009|ref|NP_001287745.1| zinc finger CCHC domain-containing protein 10 isoform 1 [Homo sapiens]'	1	NaN	NaN	NaN	NaN	NaN	NaN	NaN	0	1	1
1257	'''>gi|665821217|ref|NP_001287921.1| eukaryotic translation initiation factor 3 subunit K {ECO:0000255|HAMAP-Rule:MF_03010} isoform...'' <Preview truncated at 128 characters>'	NaN	NaN	NaN	NaN	NaN	1	NaN	NaN	0	1	1
1258	'>gi|666638015|ref|NP_001287997.1| ADP-ribosylation factor-like protein 1 isoform 2 [Homo sapiens]'	NaN	NaN	NaN	NaN	NaN	1	NaN	NaN	0	1	1
1259	'>gi|66773040|ref|NP_982278.3| presqualene diphosphate phosphatase [Homo sapiens]'	NaN	NaN	NaN	NaN	NaN	1	NaN	NaN	0	1	1
1260	'>gi|66933016|ref|NP_000875.2| inosine-5''-monophosphate dehydrogenase 2 [Homo sapiens]'	NaN	NaN	NaN	NaN	NaN	NaN	1	NaN	0	1	1
1261	'>gi|67782311|ref|NP_008860.4| helicase SKI2W [Homo sapiens]'	NaN	NaN	1	NaN	NaN	NaN	NaN	NaN	0	1	1
1262	'>gi|7019471|ref|NP_037380.1| NTF2-related export protein 1 [Homo sapiens]'	NaN	NaN	NaN	NaN	NaN	NaN	1	NaN	0	1	1
1263	'>gi|73623035|ref|NP_006452.3| sperm-associated antigen 5 [Homo sapiens]'	NaN	NaN	1	NaN	NaN	NaN	NaN	NaN	0	1	1
1264	'>gi|73747915|ref|NP_000535.3| antigen peptide transporter 2 isoform 1 [Homo sapiens]'	NaN	NaN	NaN	NaN	1	NaN	NaN	NaN	0	1	1
1265	'>gi|7661708|ref|NP_054772.1| feline leukemia virus subgroup C receptor-related protein 1 [Homo sapiens]'	NaN	NaN	NaN	NaN	1	NaN	NaN	NaN	0	1	1
1266	'>gi|7705421|ref|NP_057455.1| 3-keto-steroid reductase [Homo sapiens]'	NaN	NaN	NaN	NaN	NaN	1	NaN	NaN	0	1	1
1267	'>gi|7705748|ref|NP_057062.1| serine/threonine-protein kinase TNNI3K [Homo sapiens]'	NaN	1	NaN	NaN	NaN	NaN	NaN	NaN	0	1	1
1268	'>gi|7705893|ref|NP_057305.1| dynactin subunit 4 isoform b [Homo sapiens]'	NaN	NaN	NaN	NaN	1	NaN	NaN	NaN	0	1	1
1269	'>gi|7706254|ref|NP_057018.1| nucleolar protein 58 [Homo sapiens]'	NaN	NaN	NaN	NaN	1	NaN	NaN	NaN	0	1	1
1270	'>gi|7706351|ref|NP_057161.1| peptidyl-tRNA hydrolase 2, mitochondrial precursor [Homo sapiens]'	NaN	NaN	NaN	NaN	NaN	NaN	1	NaN	0	1	1
1271	'>gi|7770075|ref|NP_054702.1| protachykinin-1 isoform alpha precursor [Homo sapiens]'	NaN	NaN	NaN	NaN	NaN	NaN	1	NaN	0	1	1
1272	'>gi|83715985|ref|NP_001032900.1| 3-hydroxyacyl-CoA dehydrogenase type-2 isoform 2 [Homo sapiens]'	NaN	NaN	NaN	NaN	NaN	1	NaN	NaN	0	1	1
1273	'>gi|83921614|ref|NP_085056.2| cytochrome b5 type B [Homo sapiens]'	NaN	NaN	NaN	NaN	NaN	1	NaN	NaN	0	1	1
1274	'>gi|88759337|ref|NP_060536.3| GPN-loop GTPase 2 [Homo sapiens]'	NaN	NaN	NaN	NaN	NaN	1	NaN	NaN	0	1	1
1275	'>gi|8922944|ref|NP_060832.1| protein lin-7 homolog C [Homo sapiens]'	NaN	NaN	NaN	NaN	NaN	1	NaN	NaN	0	1	1
1276	'>gi|8923460|ref|NP_060316.1| tRNA selenocysteine 1-associated protein 1 [Homo sapiens]'	NaN	NaN	NaN	NaN	1	NaN	NaN	NaN	0	1	1
1277	'>gi|8923532|ref|NP_060352.1| ceroid-lipofuscinosis neuronal protein 6 [Homo sapiens]'	NaN	NaN	NaN	NaN	NaN	1	NaN	NaN	0	1	1
1278	'>gi|89353281|ref|NP_001034796.1| serologically defined colon cancer antigen 3 isoform 1 [Homo sapiens]'	NaN	NaN	NaN	NaN	1	NaN	NaN	NaN	0	1	1
1279	'>gi|95113664|ref|NP_060684.4| leucine-rich repeat-containing protein 1 [Homo sapiens]'	NaN	NaN	NaN	NaN	1	NaN	NaN	NaN	0	1	1
1280	'>gi|96975097|ref|NP_057661.3| ras-related protein Rab-6B [Homo sapiens]'	NaN	NaN	NaN	NaN	NaN	NaN	1	NaN	0	1	1
1281	'>gi|98986464|ref|NP_006818.3| transmembrane emp24 domain-containing protein 10 precursor [Homo sapiens]'	NaN	NaN	NaN	NaN	NaN	NaN	1	NaN	0	1	1
1282	'>gi|9955963|ref|NP_005680.1| ATP-binding cassette sub-family B member 6, mitochondrial [Homo sapiens]'	NaN	NaN	NaN	NaN	1	NaN	NaN	NaN	0	1	1
1283	'>gi|119395750|ref|NP_006112.3| keratin, type II cytoskeletal 1 [Homo sapiens]'	290	215	371	295	297	350	190	189	1	371	2197
1284	'>gi|55956899|ref|NP_000217.2| keratin, type I cytoskeletal 9 [Homo sapiens]'	209	164	268	248	240	225	193	269	1	269	1816
1285	'>gi|47132620|ref|NP_000414.2| keratin, type II cytoskeletal 2 epidermal [Homo sapiens]'	3	115	204	177	129	189	75	99	1	204	991
1286	'>sp|K22E_HUMAN|(Common contaminant protein)'	140	1	1	1	2	1	NaN	1	1	140	147
1287	'>gi|195972866|ref|NP_000412.3| keratin, type I cytoskeletal 10 [Homo sapiens]'	1	NaN	103	99	91	107	NaN	138	1	138	539
1288	'>gi|24430192|ref|NP_005548.2| keratin, type I cytoskeletal 16 [Homo sapiens]'	10	22	13	19	14	133	6	5	1	133	222
1289	'>sp|ALBU_BOVIN|(Common contaminant protein)'	17	20	110	26	40	19	11	5	1	110	248
1290	'>sp|K1C10_HUMAN|(Common contaminant protein)'	105	NaN	1	NaN	4	NaN	66	NaN	1	105	176
1291	'>gi|530412176|ref|XP_005257400.1| PREDICTED: keratin, type I cytoskeletal 10 isoform X1 [Homo sapiens]'	NaN	103	NaN	NaN	NaN	NaN	1	NaN	1	103	104
1292	'>gi|119395754|ref|NP_000415.2| keratin, type II cytoskeletal 5 [Homo sapiens]'	49	46	49	52	53	75	35	36	1	75	395
1293	'>sp|TRYP_PIG|(Common contaminant protein)'	54	64	55	54	47	49	57	52	1	64	432
1294	'>gi|15431310|ref|NP_000517.2| keratin, type I cytoskeletal 14 [Homo sapiens]'	33	41	39	44	39	59	28	41	1	59	324
1295	'>gi|194018511|ref|NP_778253.2| keratin, type II cytoskeletal 1b [Homo sapiens]'	5	9	14	12	NaN	46	4	8	1	46	98
1296	'>gi|5031839|ref|NP_005545.1| keratin, type II cytoskeletal 6A [Homo sapiens]'	NaN	2	20	1	16	40	NaN	4	1	40	83
1297	'>gi|119703753|ref|NP_005546.2| keratin, type II cytoskeletal 6B [Homo sapiens]'	8	18	1	29	NaN	7	13	2	1	29	78
1298	'>gi|4557701|ref|NP_000413.1| keratin, type I cytoskeletal 17 [Homo sapiens]'	2	11	5	11	1	28	NaN	NaN	1	28	58
1299	'>Reverse >gi|339275831|ref|NP_001229852.1| eukaryotic translation initiation factor 3 subunit L isoform 2 [Homo sapiens]'	3	NaN	25	NaN	NaN	NaN	NaN	NaN	1	25	28
1300	'>sp|ALBU_HUMAN|(Common contaminant protein)'	NaN	NaN	8	16	NaN	12	NaN	NaN	1	16	36
1301	'>Reverse >gi|578794903|ref|XP_006710210.1| PREDICTED: Sjoegren syndrome nuclear autoantigen 1 homolog [Homo sapiens]'	2	NaN	15	NaN	NaN	2	NaN	NaN	1	15	19
1302	'''>Reverse >gi|578837252|ref|XP_006724323.1| PREDICTED: eukaryotic translation initiation factor 3 subunit L isoform X2 [Homo sapi...'' <Preview truncated at 128 characters>'	NaN	15	NaN	NaN	NaN	NaN	NaN	NaN	1	15	15
1303	'>gi|4504919|ref|NP_002264.1| keratin, type II cytoskeletal 8 isoform 2 [Homo sapiens]'	NaN	NaN	1	NaN	14	1	NaN	NaN	1	14	16
1304	'>gi|24234699|ref|NP_002267.2| keratin, type I cytoskeletal 19 [Homo sapiens]'	NaN	1	NaN	NaN	8	13	NaN	NaN	1	13	22
1305	'>gi|89357932|ref|NP_775487.2| keratin, type II cytoskeletal 78 isoform 1 [Homo sapiens]'	9	8	8	6	4	12	1	8	1	12	56
1306	'>gi|15618995|ref|NP_258259.1| keratin, type II cytoskeletal 71 [Homo sapiens]'	NaN	11	NaN	NaN	NaN	2	3	3	1	11	19
1307	'>gi|1373325|gb|AAB08064.1| Enhanced Green Fluorescent Protein [Cloning vector pEGFP-N3](Common contaminant protein)'	NaN	NaN	NaN	10	3	4	NaN	NaN	1	10	17
1308	'>Reverse >gi|45446749|ref|NP_004975.2| kinesin heavy chain isoform 5A [Homo sapiens]'	NaN	NaN	NaN	NaN	NaN	10	NaN	NaN	1	10	10
1309	'>gi|331999954|ref|NP_002263.3| keratin, type II cytoskeletal 4 [Homo sapiens]'	NaN	NaN	NaN	NaN	NaN	8	NaN	1	1	8	9
1310	'>gi|40354195|ref|NP_954657.1| keratin, type I cytoskeletal 18 [Homo sapiens]'	NaN	NaN	NaN	NaN	8	NaN	NaN	NaN	1	8	8
1311	'>gi|153945736|ref|NP_853515.2| keratin, type I cytoskeletal 27 [Homo sapiens]'	NaN	7	NaN	NaN	NaN	4	3	NaN	1	7	14
1312	'>Reverse >gi|378925625|ref|NP_001243779.1| titin isoform N2BA [Homo sapiens]'	7	NaN	NaN	NaN	NaN	NaN	NaN	NaN	1	7	7
1313	'>gi|125628636|ref|NP_872313.2| keratin, type II cytoskeletal 80 isoform K80 [Homo sapiens]'	NaN	3	3	6	1	5	3	4	1	6	25
1314	'>gi|153791670|ref|NP_056932.2| keratin, type II cytoskeletal 2 oral [Homo sapiens]'	NaN	6	NaN	NaN	NaN	NaN	NaN	NaN	1	6	6
1315	'>gi|28372503|ref|NP_542785.1| keratin, type II cytoskeletal 72 isoform 1 [Homo sapiens]'	NaN	5	4	2	1	2	1	1	1	5	16
1316	'>gi|27894339|ref|NP_056330.3| keratin, type I cytoskeletal 23 isoform 1 [Homo sapiens]'	NaN	2	NaN	NaN	NaN	5	NaN	NaN	1	5	7
1317	'>Reverse >gi|4507987|ref|NP_003428.1| zinc finger protein 136 [Homo sapiens]'	NaN	NaN	NaN	NaN	NaN	NaN	NaN	5	1	5	5
1318	'>Reverse >gi|530416814|ref|XP_005259103.1| PREDICTED: putative L-aspartate dehydrogenase isoform X2 [Homo sapiens]'	5	NaN	NaN	NaN	NaN	NaN	NaN	NaN	1	5	5
1319	'>Reverse >gi|154240671|ref|NP_775760.3| maestro heat-like repeat-containing protein family member 2B [Homo sapiens]'	NaN	3	1	2	4	1	2	4	1	4	17
1320	'>gi|109148552|ref|NP_476429.2| keratin, type II cytoskeletal 3 [Homo sapiens]'	3	3	4	1	NaN	3	1	NaN	1	4	15
1321	'>sp|CAS1_BOVIN|(Common contaminant protein)'	1	1	1	1	1	4	2	1	1	4	12
1322	'>Reverse >gi|55956899|ref|NP_000217.2| keratin, type I cytoskeletal 9 [Homo sapiens]'	NaN	NaN	3	3	NaN	1	4	NaN	1	4	11
1323	'>Reverse >gi|322302755|ref|NP_001189788.1| SHC-transforming protein 1 isoform 5 precursor [Homo sapiens]'	NaN	NaN	NaN	NaN	NaN	2	3	4	1	4	9
1324	'>gi|28173564|ref|NP_778238.1| keratin, type II cytoskeletal 73 [Homo sapiens]'	NaN	3	NaN	NaN	1	4	NaN	NaN	1	4	8
1325	'>Reverse >gi|21361834|ref|NP_065105.2| solute carrier family 22 member 17 isoform a [Homo sapiens]'	NaN	NaN	NaN	NaN	4	NaN	NaN	NaN	1	4	4
1326	'>Reverse >gi|578794661|ref|XP_006710191.1| PREDICTED: uncharacterized protein LOC102725453 [Homo sapiens]'	NaN	NaN	NaN	4	NaN	NaN	NaN	NaN	1	4	4
1327	'>Reverse >gi|661902998|ref|NP_001284347.1| heterogeneous nuclear ribonucleoprotein M isoform c [Homo sapiens]'	NaN	NaN	NaN	NaN	NaN	NaN	NaN	4	1	4	4
1328	'>Reverse >gi|46560555|ref|NP_997196.1| transmembrane protein 132E precursor [Homo sapiens]'	3	2	1	1	NaN	1	2	1	1	3	11
1329	'>Reverse >gi|134133240|ref|NP_115527.3| pterin-4-alpha-carbinolamine dehydratase 2 [Homo sapiens]'	NaN	NaN	NaN	NaN	NaN	NaN	3	NaN	1	3	3
1330	'>Reverse >gi|14043072|ref|NP_112533.1| heterogeneous nuclear ribonucleoproteins A2/B1 isoform B1 [Homo sapiens]'	3	NaN	NaN	NaN	NaN	NaN	NaN	NaN	1	3	3
1331	'>Reverse >gi|167614485|ref|NP_006102.2| 3-ketoacyl-CoA thiolase, mitochondrial [Homo sapiens]'	NaN	NaN	NaN	NaN	NaN	NaN	3	NaN	1	3	3
1332	'>Reverse >gi|530406610|ref|XP_005254804.1| PREDICTED: probable E3 ubiquitin-protein ligase HERC1 isoform X6 [Homo sapiens]'	NaN	NaN	NaN	3	NaN	NaN	NaN	NaN	1	3	3
1333	'>Reverse >gi|73623035|ref|NP_006452.3| sperm-associated antigen 5 [Homo sapiens]'	3	NaN	NaN	NaN	NaN	NaN	NaN	NaN	1	3	3
1334	'>gi|254675185|ref|NP_853517.2| keratin, type I cytoskeletal 26 [Homo sapiens]'	NaN	3	NaN	NaN	NaN	NaN	NaN	NaN	1	3	3
1335	'>Reverse >gi|122939159|ref|NP_031391.2| protein-arginine deiminase type-2 [Homo sapiens]'	2	2	NaN	NaN	NaN	2	1	NaN	1	2	7
1336	'>gi|155969697|ref|NP_775109.2| keratin, type II cytoskeletal 6C [Homo sapiens]'	2	2	NaN	1	NaN	NaN	NaN	NaN	1	2	5
1337	'>sp|K1C15_SHEEP|(Common contaminant protein)'	NaN	2	NaN	2	NaN	NaN	1	NaN	1	2	5
1338	'>Reverse >gi|11761619|ref|NP_037466.2| mannose-1-phosphate guanyltransferase beta isoform 1 [Homo sapiens]'	NaN	NaN	NaN	NaN	2	NaN	NaN	2	1	2	4
1339	'>Reverse >gi|311771714|ref|NP_001185730.1| eukaryotic translation initiation factor 4 gamma 3 isoform 1 [Homo sapiens]'	1	NaN	NaN	NaN	NaN	NaN	1	2	1	2	4
1340	'>Reverse >gi|39780588|ref|NP_060598.3| pre-rRNA-processing protein TSR1 homolog [Homo sapiens]'	NaN	NaN	2	NaN	NaN	2	NaN	NaN	1	2	4
1341	'>Reverse >gi|147904340|ref|NP_079498.2| WD repeat-containing protein 82 [Homo sapiens]'	NaN	NaN	NaN	1	2	NaN	NaN	NaN	1	2	3
1342	'>Reverse >gi|32261320|ref|NP_037422.2| homologous-pairing protein 2 homolog isoform 1 [Homo sapiens]'	1	NaN	NaN	NaN	NaN	NaN	NaN	2	1	2	3
1343	'>Reverse >gi|50312655|ref|NP_149099.2| heat shock transcription factor, Y-linked isoform 1 [Homo sapiens]'	1	NaN	NaN	2	NaN	NaN	NaN	NaN	1	2	3
1344	'>gi|114431246|ref|NP_853513.2| keratin, type I cytoskeletal 28 [Homo sapiens]'	NaN	2	NaN	NaN	NaN	NaN	NaN	1	1	2	3
1345	'>gi|148612803|ref|NP_778223.2| keratin, type II cytoskeletal 74 [Homo sapiens]'	1	2	NaN	NaN	NaN	NaN	NaN	NaN	1	2	3
1346	'>gi|32567786|ref|NP_787028.1| keratin, type II cytoskeletal 79 [Homo sapiens]'	NaN	1	2	NaN	NaN	NaN	NaN	NaN	1	2	3
1347	'>Reverse >gi|114796644|ref|NP_001041659.1| regulator of chromosome condensation isoform a [Homo sapiens]'	NaN	2	NaN	NaN	NaN	NaN	NaN	NaN	1	2	2
1348	'>Reverse >gi|145312241|ref|NP_071330.3| differentially expressed in FDCP 6 homolog [Homo sapiens]'	NaN	NaN	NaN	NaN	NaN	2	NaN	NaN	1	2	2
1349	'>Reverse >gi|156616290|ref|NP_001096078.1| collagen alpha-6(VI) chain precursor [Homo sapiens]'	NaN	NaN	NaN	2	NaN	NaN	NaN	NaN	1	2	2
1350	'>Reverse >gi|167466272|ref|NP_689728.3| cytoskeleton-associated protein 2-like [Homo sapiens]'	NaN	NaN	NaN	NaN	2	NaN	NaN	NaN	1	2	2
1351	'>Reverse >gi|168823443|ref|NP_055921.2| helicase ARIP4 [Homo sapiens]'	NaN	NaN	NaN	2	NaN	NaN	NaN	NaN	1	2	2
1352	'>Reverse >gi|222537752|ref|NP_064594.3| SH2 domain-containing adapter protein D [Homo sapiens]'	NaN	NaN	NaN	NaN	NaN	NaN	2	NaN	1	2	2
1353	'>Reverse >gi|282165810|ref|NP_001163887.1| tight junction protein ZO-2 isoform 3 [Homo sapiens]'	NaN	NaN	NaN	NaN	NaN	NaN	2	NaN	1	2	2
1354	'''>Reverse >gi|295821183|ref|NP_001171475.1| propionyl-CoA carboxylase alpha chain, mitochondrial isoform c precursor [Homo sapien...'' <Preview truncated at 128 characters>'	NaN	NaN	NaN	NaN	2	NaN	NaN	NaN	1	2	2
1355	'>Reverse >gi|34452684|ref|NP_057204.2| E3 ubiquitin-protein ligase RLIM [Homo sapiens]'	2	NaN	NaN	NaN	NaN	NaN	NaN	NaN	1	2	2
1356	'>Reverse >gi|375151585|ref|NP_001243502.1| neuronal acetylcholine receptor subunit alpha-4 isoform 2 [Homo sapiens]'	NaN	NaN	2	NaN	NaN	NaN	NaN	NaN	1	2	2
1357	'>Reverse >gi|40805823|ref|NP_690848.1| collagen alpha-1(XXII) chain precursor [Homo sapiens]'	NaN	NaN	NaN	2	NaN	NaN	NaN	NaN	1	2	2
1358	'>Reverse >gi|4501945|ref|NP_001115.1| ADM precursor [Homo sapiens]'	NaN	NaN	NaN	NaN	NaN	NaN	2	NaN	1	2	2
1359	'>Reverse >gi|4504403|ref|NP_002111.1| HLA class II histocompatibility antigen, DO beta chain precursor [Homo sapiens]'	NaN	NaN	2	NaN	NaN	NaN	NaN	NaN	1	2	2
1360	'>Reverse >gi|4504615|ref|NP_000587.1| insulin-like growth factor-binding protein 1 precursor [Homo sapiens]'	NaN	2	NaN	NaN	NaN	NaN	NaN	NaN	1	2	2
1361	'>Reverse >gi|4505379|ref|NP_003195.1| nuclear factor erythroid 2-related factor 1 [Homo sapiens]'	NaN	NaN	NaN	NaN	NaN	NaN	NaN	2	1	2	2
1362	'>Reverse >gi|45827701|ref|NP_005119.2| protein dopey-2 [Homo sapiens]'	NaN	NaN	2	NaN	NaN	NaN	NaN	NaN	1	2	2
1363	'>Reverse >gi|533112494|ref|NP_775871.2| mucin-19 precursor [Homo sapiens]'	NaN	2	NaN	NaN	NaN	NaN	NaN	NaN	1	2	2
1364	'>Reverse >gi|55749544|ref|NP_055446.2| SH3 and PX domain-containing protein 2A [Homo sapiens]'	NaN	NaN	NaN	NaN	NaN	NaN	2	NaN	1	2	2
1365	'>Reverse >gi|578836248|ref|XP_006723956.1| PREDICTED: RNA-binding protein 39 isoform X4 [Homo sapiens]'	2	NaN	NaN	NaN	NaN	NaN	NaN	NaN	1	2	2
1366	'>Reverse >gi|590121974|ref|NP_001277192.1| dedicator of cytokinesis protein 10 DOCK10.2 [Homo sapiens]'	NaN	NaN	NaN	NaN	NaN	2	NaN	NaN	1	2	2
1367	'>Reverse >gi|62988361|ref|NP_001615.1| absent in melanoma 1 protein [Homo sapiens]'	NaN	NaN	NaN	NaN	NaN	NaN	NaN	2	1	2	2
1368	'>Reverse >gi|63252863|ref|NP_115820.2| structure-specific endonuclease subunit SLX4 [Homo sapiens]'	NaN	NaN	NaN	NaN	NaN	NaN	2	NaN	1	2	2
1369	'>gi|131412225|ref|NP_705694.2| keratin, type I cytoskeletal 13 isoform a [Homo sapiens]'	NaN	NaN	NaN	NaN	NaN	2	NaN	NaN	1	2	2
1370	'>gi|31559829|ref|NP_853512.1| keratin, type I cytoskeletal 25 [Homo sapiens]'	NaN	2	NaN	NaN	NaN	NaN	NaN	NaN	1	2	2
1371	'>sp|CASB_BOVIN|(Common contaminant protein)'	1	1	NaN	1	1	NaN	NaN	NaN	1	1	4
1372	'>Reverse >gi|148886718|ref|NP_079212.2| zinc finger CCHC domain-containing protein 4 [Homo sapiens]'	1	NaN	NaN	1	NaN	NaN	NaN	NaN	1	1	2
1373	'>Reverse >gi|507417947|ref|NP_001265253.1| tastin isoform 3 [Homo sapiens]'	NaN	NaN	NaN	1	1	NaN	NaN	NaN	1	1	2
1374	'>Reverse >gi|557878673|ref|NP_001273644.1| cytosolic carboxypeptidase 1 isoform a [Homo sapiens]'	1	1	NaN	NaN	NaN	NaN	NaN	NaN	1	1	2
1375	'''>Reverse >gi|578811764|ref|XP_006715191.1| PREDICTED: threonylcarbamoyladenosine tRNA methylthiotransferase isoform X2 [Homo sap...'' <Preview truncated at 128 characters>'	NaN	NaN	NaN	1	NaN	NaN	NaN	1	1	1	2
1376	'>Reverse >gi|96974985|ref|NP_060191.3| coiled-coil and C2 domain-containing protein 1A [Homo sapiens]'	NaN	1	NaN	NaN	NaN	NaN	1	NaN	1	1	2
1377	'>Reverse >gi|105990532|ref|NP_000375.2| apolipoprotein B-100 precursor [Homo sapiens]'	NaN	NaN	NaN	NaN	1	NaN	NaN	NaN	1	1	1
1378	'>Reverse >gi|106049295|ref|NP_000911.2| pyruvate carboxylase, mitochondrial precursor [Homo sapiens]'	NaN	NaN	NaN	NaN	NaN	NaN	NaN	1	1	1	1
1379	'>Reverse >gi|113722116|ref|NP_079455.3| plexin-A2 precursor [Homo sapiens]'	NaN	NaN	1	NaN	NaN	NaN	NaN	NaN	1	1	1
1380	'>Reverse >gi|11386189|ref|NP_006674.2| epididymal secretory protein E3-alpha precursor [Homo sapiens]'	NaN	NaN	NaN	NaN	1	NaN	NaN	NaN	1	1	1
1381	'>Reverse >gi|116256464|ref|NP_997245.2| uncharacterized protein KIAA1211-like [Homo sapiens]'	NaN	NaN	NaN	NaN	1	NaN	NaN	NaN	1	1	1
1382	'>Reverse >gi|119964721|ref|NP_005237.2| tyrosine-protein kinase Fer [Homo sapiens]'	NaN	NaN	NaN	NaN	NaN	1	NaN	NaN	1	1	1
1383	'>Reverse >gi|121114287|ref|NP_056131.2| apoptosis-stimulating of p53 protein 1 [Homo sapiens]'	NaN	NaN	NaN	NaN	1	NaN	NaN	NaN	1	1	1
1384	'>Reverse >gi|13899233|ref|NP_113609.1| tetratricopeptide repeat protein 25 [Homo sapiens]'	NaN	1	NaN	NaN	NaN	NaN	NaN	NaN	1	1	1
1385	'>Reverse >gi|14149764|ref|NP_115491.1| potassium channel subfamily K member 16 isoform 2 [Homo sapiens]'	NaN	NaN	NaN	NaN	1	NaN	NaN	NaN	1	1	1
1386	'>Reverse >gi|14211540|ref|NP_066014.1| putative helicase MOV-10 isoform 1 [Homo sapiens]'	NaN	NaN	NaN	NaN	NaN	NaN	1	NaN	1	1	1
1387	'>Reverse >gi|153251229|ref|NP_001258.2| chondroadherin precursor [Homo sapiens]'	NaN	NaN	NaN	NaN	NaN	1	NaN	NaN	1	1	1
1388	'>Reverse >gi|197245440|ref|NP_056052.2| uncharacterized protein KIAA1107 [Homo sapiens]'	1	NaN	NaN	NaN	NaN	NaN	NaN	NaN	1	1	1
1389	'>Reverse >gi|209862994|ref|NP_003673.3| MAP kinase-activating death domain protein isoform d [Homo sapiens]'	NaN	1	NaN	NaN	NaN	NaN	NaN	NaN	1	1	1
1390	'>Reverse >gi|211971008|ref|NP_001130010.1| acyl-CoA dehydrogenase family member 10 isoform a [Homo sapiens]'	NaN	NaN	NaN	NaN	NaN	1	NaN	NaN	1	1	1
1391	'>Reverse >gi|21687020|ref|NP_660288.1| EVI5-like protein isoform 2 [Homo sapiens]'	NaN	1	NaN	NaN	NaN	NaN	NaN	NaN	1	1	1
1392	'>Reverse >gi|22035594|ref|NP_663619.1| 39S ribosomal protein L35, mitochondrial isoform b [Homo sapiens]'	NaN	NaN	NaN	NaN	NaN	NaN	NaN	1	1	1	1
1393	'>Reverse >gi|222136583|ref|NP_001558.3| phosphatidylinositol 3,4,5-trisphosphate 5-phosphatase 2 [Homo sapiens]'	NaN	NaN	NaN	NaN	NaN	NaN	NaN	1	1	1	1
1394	'>Reverse >gi|224586880|ref|NP_001139120.1| ras-specific guanine nucleotide-releasing factor 1 isoform 3 [Homo sapiens]'	NaN	NaN	NaN	NaN	NaN	1	NaN	NaN	1	1	1
1395	'>Reverse >gi|22748999|ref|NP_689687.1| uncharacterized protein C19orf18 precursor [Homo sapiens]'	NaN	1	NaN	NaN	NaN	NaN	NaN	NaN	1	1	1
1396	'>Reverse >gi|23097308|ref|NP_149062.1| nesprin-1 isoform 2 [Homo sapiens]'	NaN	NaN	NaN	NaN	NaN	NaN	1	NaN	1	1	1
1397	'>Reverse >gi|238814322|ref|NP_001029345.2| mitochondrial 10-formyltetrahydrofolate dehydrogenase precursor [Homo sapiens]'	NaN	NaN	NaN	NaN	NaN	1	NaN	NaN	1	1	1
1398	'>Reverse >gi|24308273|ref|NP_067066.1| costars family protein ABRACL [Homo sapiens]'	1	NaN	NaN	NaN	NaN	NaN	NaN	NaN	1	1	1
1399	'>Reverse >gi|24308382|ref|NP_443157.1| leukocyte receptor cluster member 8 [Homo sapiens]'	NaN	NaN	NaN	NaN	NaN	1	NaN	NaN	1	1	1
1400	'>Reverse >gi|24371272|ref|NP_714968.1| probable palmitoyltransferase ZDHHC14 isoform 2 [Homo sapiens]'	NaN	NaN	NaN	NaN	1	NaN	NaN	NaN	1	1	1
1401	'''>Reverse >gi|269847558|ref|NP_001161384.1| ventricular zone-expressed PH domain-containing protein homolog 1 isoform 1 [Homo sap...'' <Preview truncated at 128 characters>'	NaN	NaN	NaN	NaN	NaN	NaN	NaN	1	1	1	1
1402	'>Reverse >gi|27436953|ref|NP_525023.2| ATP-binding cassette sub-family A member 6 [Homo sapiens]'	NaN	NaN	NaN	NaN	NaN	NaN	1	NaN	1	1	1
1403	'>Reverse >gi|27735113|ref|NP_775774.1| EF-hand calcium-binding domain-containing protein 3 isoform b [Homo sapiens]'	NaN	NaN	1	NaN	NaN	NaN	NaN	NaN	1	1	1
1404	'>Reverse >gi|283436224|ref|NP_001164007.1| ATPase family AAA domain-containing protein 3A isoform 3 [Homo sapiens]'	NaN	NaN	NaN	NaN	NaN	NaN	NaN	1	1	1	1
1405	'>Reverse >gi|299758394|ref|NP_001177645.1| dynamin-2 isoform 5 [Homo sapiens]'	1	NaN	NaN	NaN	NaN	NaN	NaN	NaN	1	1	1
1406	'>Reverse >gi|31795563|ref|NP_775489.2| tryptophan 5-hydroxylase 2 [Homo sapiens]'	NaN	NaN	NaN	NaN	NaN	NaN	NaN	1	1	1	1
1407	'>Reverse >gi|325053678|ref|NP_001191347.1| regulator of G-protein signaling 6 isoform 4 [Homo sapiens]'	NaN	NaN	1	NaN	NaN	NaN	NaN	NaN	1	1	1
1408	'>Reverse >gi|33519440|ref|NP_878272.1| E3 ubiquitin-protein ligase CCNB1IP1 [Homo sapiens]'	NaN	NaN	NaN	NaN	1	NaN	NaN	NaN	1	1	1
1409	'>Reverse >gi|344925930|ref|NP_001230715.1| V(D)J recombination-activating protein 2 [Homo sapiens]'	NaN	NaN	NaN	NaN	1	NaN	NaN	NaN	1	1	1
1410	'>Reverse >gi|358679318|ref|NP_001240628.1| protein LAP2 isoform 8 [Homo sapiens]'	NaN	NaN	NaN	NaN	NaN	NaN	NaN	1	1	1	1
1411	'>Reverse >gi|39930371|ref|NP_059986.1| ras-related protein Rab-39A [Homo sapiens]'	NaN	NaN	NaN	NaN	NaN	1	NaN	NaN	1	1	1
1412	'>Reverse >gi|39930463|ref|NP_085142.1| protein BHLHb9 [Homo sapiens]'	NaN	NaN	NaN	1	NaN	NaN	NaN	NaN	1	1	1
1413	'>Reverse >gi|42476024|ref|NP_060206.2| THUMP domain-containing protein 1 [Homo sapiens]'	NaN	1	NaN	NaN	NaN	NaN	NaN	NaN	1	1	1
1414	'>Reverse >gi|44917604|ref|NP_065813.1| SLIT-ROBO Rho GTPase-activating protein 1 [Homo sapiens]'	NaN	NaN	1	NaN	NaN	NaN	NaN	NaN	1	1	1
1415	'>Reverse >gi|4503923|ref|NP_000796.1| gastrin preproprotein [Homo sapiens]'	NaN	NaN	1	NaN	NaN	NaN	NaN	NaN	1	1	1
1416	'>Reverse >gi|4506039|ref|NP_003972.1| protein regulator of cytokinesis 1 isoform 1 [Homo sapiens]'	NaN	NaN	1	NaN	NaN	NaN	NaN	NaN	1	1	1
1417	'>Reverse >gi|4506283|ref|NP_003454.1| protein tyrosine phosphatase type IVA 1 [Homo sapiens]'	NaN	NaN	1	NaN	NaN	NaN	NaN	NaN	1	1	1
1418	'>Reverse >gi|4507101|ref|NP_003073.1| snRNA-activating protein complex subunit 1 [Homo sapiens]'	NaN	NaN	NaN	1	NaN	NaN	NaN	NaN	1	1	1
1419	'>Reverse >gi|4826816|ref|NP_005088.1| leucine-rich glioma-inactivated protein 1 precursor [Homo sapiens]'	NaN	NaN	NaN	NaN	1	NaN	NaN	NaN	1	1	1
1420	'>Reverse >gi|4885193|ref|NP_005215.1| AT-rich interactive domain-containing protein 3A [Homo sapiens]'	NaN	NaN	NaN	1	NaN	NaN	NaN	NaN	1	1	1
1421	'>Reverse >gi|50083293|ref|NP_116205.3| centrosomal protein of 89 kDa [Homo sapiens]'	NaN	NaN	NaN	1	NaN	NaN	NaN	NaN	1	1	1
1422	'>Reverse >gi|51242955|ref|NP_001003787.1| STE20-related kinase adapter protein alpha isoform 1 [Homo sapiens]'	NaN	NaN	NaN	1	NaN	NaN	NaN	NaN	1	1	1
1423	'>Reverse >gi|51896039|ref|NP_001004106.1| G protein-coupled receptor kinase 6 isoform A [Homo sapiens]'	NaN	NaN	NaN	NaN	NaN	1	NaN	NaN	1	1	1
1424	'>Reverse >gi|523704333|ref|NP_005818.2| solute carrier family 35 member B1 isoform 1 [Homo sapiens]'	NaN	NaN	NaN	NaN	NaN	NaN	1	NaN	1	1	1
1425	'>Reverse >gi|530357935|ref|XP_005275995.1| PREDICTED: rootletin-like [Homo sapiens]'	NaN	1	NaN	NaN	NaN	NaN	NaN	NaN	1	1	1
1426	'>Reverse >gi|530367265|ref|XP_005264214.1| PREDICTED: COMM domain-containing protein 1 isoform X1 [Homo sapiens]'	NaN	NaN	NaN	NaN	1	NaN	NaN	NaN	1	1	1
1427	'>Reverse >gi|530374913|ref|XP_005247654.1| PREDICTED: YEATS domain-containing protein 2 isoform X1 [Homo sapiens]'	NaN	NaN	NaN	NaN	1	NaN	NaN	NaN	1	1	1
1428	'>Reverse >gi|530383304|ref|XP_005266849.1| PREDICTED: transmembrane protein FLJ37396 isoform X1 [Homo sapiens]'	NaN	NaN	1	NaN	NaN	NaN	NaN	NaN	1	1	1
1429	'>Reverse >gi|530383986|ref|XP_005267166.1| PREDICTED: sphingomyelin phosphodiesterase 2 isoform X2 [Homo sapiens]'	NaN	NaN	NaN	NaN	NaN	NaN	1	NaN	1	1	1
1430	'''>Reverse >gi|530386889|ref|XP_005249999.1| PREDICTED: arf-GAP with GTPase, ANK repeat and PH domain-containing protein 3 isoform...'' <Preview truncated at 128 characters>'	NaN	NaN	1	NaN	NaN	NaN	NaN	NaN	1	1	1
1431	'>Reverse >gi|530407381|ref|XP_005255064.1| PREDICTED: uncharacterized protein LOC101927662 isoform X1 [Homo sapiens]'	NaN	NaN	NaN	NaN	NaN	1	NaN	NaN	1	1	1
1432	'>Reverse >gi|530415206|ref|XP_005260136.1| PREDICTED: occludin/ELL domain-containing protein 1 isoform X1 [Homo sapiens]'	NaN	NaN	NaN	NaN	1	NaN	NaN	NaN	1	1	1
1433	'''>Reverse >gi|530420097|ref|XP_005261665.1| PREDICTED: beta-1,4-mannosyl-glycoprotein 4-beta-N-acetylglucosaminyltransferase isof...'' <Preview truncated at 128 characters>'	NaN	NaN	NaN	NaN	NaN	NaN	1	NaN	1	1	1
1434	'>Reverse >gi|545688691|ref|NP_001269970.1| ubiquitin carboxyl-terminal hydrolase 25 isoform USP25m [Homo sapiens]'	NaN	1	NaN	NaN	NaN	NaN	NaN	NaN	1	1	1
1435	'>Reverse >gi|555289992|ref|NP_001273135.1| centrosomal protein of 162 kDa isoform b [Homo sapiens]'	NaN	1	NaN	NaN	NaN	NaN	NaN	NaN	1	1	1
1436	'>Reverse >gi|568384734|ref|NP_001275511.1| tetratricopeptide repeat protein 14 isoform c [Homo sapiens]'	NaN	1	NaN	NaN	NaN	NaN	NaN	NaN	1	1	1
1437	'>Reverse >gi|570359601|ref|NP_001275668.1| dynamin-1 isoform 4 [Homo sapiens]'	1	NaN	NaN	NaN	NaN	NaN	NaN	NaN	1	1	1
1438	'>Reverse >gi|578823155|ref|XP_006719245.1| PREDICTED: tastin isoform X2 [Homo sapiens]'	NaN	1	NaN	NaN	NaN	NaN	NaN	NaN	1	1	1
1439	'>Reverse >gi|58219064|ref|NP_001010846.1| SH2 domain-containing adapter protein E [Homo sapiens]'	NaN	NaN	1	NaN	NaN	NaN	NaN	NaN	1	1	1
1440	'>Reverse >gi|604723370|ref|NP_699165.3| scavenger receptor class F member 2 isoform 1 precursor [Homo sapiens]'	NaN	NaN	NaN	NaN	NaN	1	NaN	NaN	1	1	1
1441	'>Reverse >gi|665821155|ref|NP_001287877.1| lon protease homolog 2, peroxisomal isoform 2 [Homo sapiens]'	NaN	NaN	NaN	1	NaN	NaN	NaN	NaN	1	1	1
1442	'>Reverse >gi|669174625|ref|NP_001288177.1| ELKS/Rab6-interacting/CAST family member 1 isoform zeta [Homo sapiens]'	NaN	NaN	1	NaN	NaN	NaN	NaN	NaN	1	1	1
1443	'>Reverse >gi|66932999|ref|NP_006276.2| dual specificity testis-specific protein kinase 1 [Homo sapiens]'	NaN	NaN	NaN	NaN	1	NaN	NaN	NaN	1	1	1
1444	'>Reverse >gi|7657198|ref|NP_055288.1| probable dimethyladenosine transferase [Homo sapiens]'	NaN	NaN	NaN	NaN	NaN	NaN	NaN	1	1	1	1
1445	'>Reverse >gi|84872173|ref|NP_003423.1| zinc finger protein 131 isoform 2 [Homo sapiens]'	NaN	NaN	NaN	1	NaN	NaN	NaN	NaN	1	1	1
1446	'>Reverse >gi|87298939|ref|NP_689607.2| glutamate-rich protein 6 [Homo sapiens]'	1	NaN	NaN	NaN	NaN	NaN	NaN	NaN	1	1	1
1447	'>Reverse >gi|90819229|ref|NP_758441.2| cTAGE family member 2 [Homo sapiens]'	NaN	1	NaN	NaN	NaN	NaN	NaN	NaN	1	1	1
1448	'>Reverse >gi|93204867|ref|NP_065803.2| probable G-protein coupled receptor 158 precursor [Homo sapiens]'	NaN	NaN	NaN	NaN	NaN	NaN	NaN	1	1	1	1
1449	'>gi|192807292|ref|NP_061889.2| keratin, type I cytoskeletal 24 [Homo sapiens]'	NaN	1	NaN	NaN	NaN	NaN	NaN	NaN	1	1	1
1450	'>gi|27477127|ref|NP_149022.3| keratin, type II cuticular Hb2 [Homo sapiens]'	NaN	1	NaN	NaN	NaN	NaN	NaN	NaN	1	1	1
1451	'>gi|27894337|ref|NP_061883.1| keratin, type I cytoskeletal 20 [Homo sapiens]'	NaN	1	NaN	NaN	NaN	NaN	NaN	NaN	1	1	1
1452	'>gi|67782365|ref|NP_005547.3| keratin, type II cytoskeletal 7 [Homo sapiens]'	NaN	1	NaN	NaN	NaN	NaN	NaN	NaN	1	1	1
1453	'>sp|CAS2_BOVIN|(Common contaminant protein)'	NaN	NaN	1	NaN	NaN	NaN	NaN	NaN	1	1	1
1454	'>sp|K2C1_HUMAN|(Common contaminant protein)'	NaN	NaN	NaN	NaN	1	NaN	NaN	NaN	1	1	1
1455	'>sp|TRY1_BOVIN|(Common contaminant protein)'	1	NaN	NaN	NaN	NaN	NaN	NaN	NaN	1	1	1
